# Supplementary material for: Profiling the RNA editomes of wild-type C. elegans and ADAR mutants
Source: HighWire-hosted journal article supplement (doi:10.1101/gr.176107.114), 2014-11-04
Supplement: Revised_Supplemental_Tables.xlsx [file Revised_Supplemental_Tables.xlsx]

## Sheet: Supplementary Table 2
Strain	Dev. stage	RNA-seq
		Data amount				Data quality
		Total read pairs	Read length	Duplication rate	Effective read pairs	rRNA rate	Exonic rate	Intronic rate	Intergenic rate	Strand Specificity	Genes detected
wild type (N2)	Embryo	106463992	2╳100nt	0.79	11156411	0.001	0.964	0.025	0.01	0.999	16952
	L1	104501318	2╳100nt	0.731	14012340	0.002	0.967	0.024	0.009	0.999	17812
	L2	98171780	2╳100nt	0.763	11579034	0.001	0.974	0.02	0.006	0.999	16017
	L4	100934306	2╳100nt	0.75	12563369	0.002	0.979	0.017	0.004	0.999	16706
	Day1Adult	102571656	2╳100nt	0.752	12686681	0.002	0.977	0.018	0.005	0.999	15845
	Day8Adult	108934716	2╳100nt	0.717	15388310	0.003	0.967	0.026	0.007	0.999	18076
adr-1 (BB2)	Embryo	103020304	2╳100nt	0.842	8111493	0.001	0.965	0.026	0.009	0.998	17027
	L1	112032334	2╳90nt	0.713	16056526	0.006	0.967	0.023	0.01	0.999	18448
	L4	106873036	2╳100nt	0.821	9545789	0.001	0.977	0.019	0.005	0.999	16311
	Day1Adult	105832720	2╳100nt	0.702	15733556	0.004	0.979	0.017	0.003	0.998	16309
adr-2 (BB3)	Embryo	104744254	2╳100nt	0.884	6065309	0.001	0.958	0.031	0.011	0.999	17453
	L1	119420890	2╳90nt	0.766	13985246	0.001	0.963	0.024	0.012	0.999	18014
	L4	101764630	2╳100nt	0.835	8363394	0.002	0.974	0.02	0.005	0.998	16295
	Day1Adult	106672716	2╳100nt	0.747	13425975	0.003	0.975	0.02	0.005	0.999	16638
adr-1; adr-2 (BB4)	Embryo	106730294	2╳100nt	0.886	6037775	0.001	0.955	0.032	0.013	0.999	17217
	L1	116383540	2╳90nt	0.763	13795048	0.01	0.956	0.029	0.015	0.999	19368
	L4	105825984	2╳100nt	0.884	6103498	0.001	0.977	0.019	0.005	0.999	16640
	Day1Adult	102264622	2╳100nt	0.784	10972053	0.003	0.976	0.018	0.005	0.998	16371

## Sheet: Supplemental Table 3
Strain	Dev. stage	DNA-seq
		Total read pairs	Read length	Effective read pairs	Genome coverage	Mean depth	Median depth
wild type (N2)	Day1Adult	179129684	2╳90nt	134670589	99151467	244X	246X
adr-1 (BB2)	Day1Adult	168142481	2╳90nt	132653251	99038257	240X	236X
adr-2 (BB3)	Day1Adult	56798904	2╳100nt	39752115	92816914	84X	20X
adr-1; adr-2 (BB4)	Day1Adult	185210991	2╳90nt	150278654	99096017	272X	275X

## Sheet: Supplemental Table 4
						Wild type																		adr-1
						Embryo			L1			L2			L4			Day1 adult			Day8 adult			Embryo			L1			L4			Day1 adult
Chr	Position	Editing_type	strand	location	neighboring_gene	Depth	Edited_reads	Editing_frequency	Depth	Edited_reads	Editing_frequency	Depth	Edited_reads	Editing_frequency	Depth	Edited_reads	Editing_frequency	Depth	Edited_reads	Editing_frequency	Depth	Edited_reads	Editing_frequency	Depth	Edited_reads	Editing_frequency	Depth	Edited_reads	Editing_frequency	Depth	Edited_reads	Editing_frequency	Depth	Edited_reads	Editing_frequency
I	1000736	A-G	+	antisense	null	0	0	-	0	0	-	0	0	-	0	0	-	0	0	-	0	0	-	1	1	1	2	1	0.5	0	0	-	0	0	-
I	1000743	A-G	+	antisense	null	0	0	-	0	0	-	0	0	-	0	0	-	0	0	-	0	0	-	1	1	1	2	2	1	0	0	-	0	0	-
I	1000750	A-G	+	antisense	null	0	0	-	0	0	-	0	0	-	0	0	-	0	0	-	0	0	-	1	1	1	2	1	0.5	0	0	-	0	0	-
I	1000755	A-G	+	antisense	null	0	0	-	0	0	-	0	0	-	0	0	-	0	0	-	0	0	-	1	1	1	2	2	1	0	0	-	0	0	-
I	1000758	A-G	+	antisense	null	0	0	-	0	0	-	0	0	-	0	0	-	0	0	-	0	0	-	1	1	1	2	2	1	0	0	-	0	0	-
I	10064026	A-G	-	upstream	Y106G6C.1	0	0	-	0	0	-	0	0	-	0	0	-	0	0	-	0	0	-	0	0	-	0	0	-	0	0	-	0	0	-
I	10064031	A-G	-	upstream	Y106G6C.1	0	0	-	0	0	-	0	0	-	0	0	-	0	0	-	0	0	-	0	0	-	0	0	-	0	0	-	0	0	-
I	10064511	A-G	-	integenic	-	0	0	-	0	0	-	0	0	-	0	0	-	0	0	-	0	0	-	0	0	-	0	0	-	0	0	-	0	0	-
I	10064535	A-G	-	integenic	-	0	0	-	0	0	-	0	0	-	0	0	-	0	0	-	0	0	-	0	0	-	0	0	-	0	0	-	0	0	-
I	10064541	A-G	-	integenic	-	0	0	-	0	0	-	0	0	-	0	0	-	0	0	-	0	0	-	0	0	-	0	0	-	0	0	-	0	0	-
I	10064543	A-G	-	integenic	-	0	0	-	0	0	-	0	0	-	0	0	-	0	0	-	0	0	-	0	0	-	0	0	-	0	0	-	0	0	-
I	10064544	A-G	-	integenic	-	0	0	-	0	0	-	0	0	-	0	0	-	0	0	-	0	0	-	0	0	-	0	0	-	0	0	-	0	0	-
I	10064556	A-G	-	integenic	-	0	0	-	0	0	-	0	0	-	0	0	-	0	0	-	0	0	-	0	0	-	0	0	-	0	0	-	0	0	-
I	10064557	A-G	-	integenic	-	0	0	-	0	0	-	0	0	-	0	0	-	0	0	-	0	0	-	0	0	-	0	0	-	0	0	-	0	0	-
I	1016083	A-G	+	upstream	C54G6.5	0	0	-	0	0	-	0	0	-	0	0	-	1	1	1	0	0	-	0	0	-	0	0	-	2	0	0	7	2	0.285714
I	10169028	A-G	-	downstream	C25A1.4	0	0	-	0	0	-	0	0	-	0	0	-	0	0	-	0	0	-	0	0	-	0	0	-	0	0	-	0	0	-
I	10171175	A-G	-	intron	C25A1.4	0	0	-	0	0	-	0	0	-	0	0	-	0	0	-	0	0	-	0	0	-	0	0	-	0	0	-	0	0	-
I	10176661	A-G	+	upstream	C25A1.5	0	0	-	2	2	1	0	0	-	0	0	-	0	0	-	0	0	-	0	0	-	1	0	0	0	0	-	0	0	-
I	10176662	A-G	+	upstream	C25A1.5	0	0	-	2	2	1	0	0	-	0	0	-	0	0	-	0	0	-	0	0	-	1	0	0	0	0	-	0	0	-
I	1017804	A-G	+	downstream	C54G6.5	0	0	-	0	0	-	0	0	-	0	0	-	1	0	0	0	0	-	0	0	-	0	0	-	0	0	-	5	2	0.4
I	1017851	A-G	+	downstream	C54G6.5	0	0	-	0	0	-	0	0	-	0	0	-	1	0	0	0	0	-	0	0	-	0	0	-	0	0	-	5	2	0.4
I	1017852	A-G	+	downstream	C54G6.5	0	0	-	0	0	-	0	0	-	0	0	-	1	0	0	0	0	-	0	0	-	0	0	-	0	0	-	5	2	0.4
I	10184003	A-G	+	downstream	C25A1.7	12	0	0	16	0	0	9	0	0	1	0	0	15	0	0	1	0	0	3	1	0.333333	7	1	0.142857	8	0	0	5	1	0.2
I	10184004	A-G	+	downstream	C25A1.7	12	2	0.166667	16	1	0.0625	9	0	0	1	0	0	15	2	0.133333	1	0	0	3	0	0	7	3	0.428571	8	1	0.125	5	1	0.2
I	10184036	A-G	+	downstream	C25A1.7	10	1	0.1	14	1	0.0714286	7	0	0	1	0	0	12	2	0.166667	0	0	-	3	0	0	6	0	0	8	1	0.125	5	1	0.2
I	10184096	A-G	+	downstream	C25A1.7	0	0	-	1	0	0	1	0	0	0	0	-	0	0	-	0	0	-	1	1	1	0	0	-	1	0	0	1	1	1
I	10184269	A-G	+	downstream	C25A1.7	11	0	0	11	3	0.272727	13	0	0	3	0	0	11	1	0.0909091	1	0	0	4	1	0.25	7	3	0.428571	6	1	0.166667	6	1	0.166667
I	1018860	A-C	+	CDS	Y34D9A.11	0	0	-	70	2	0.0285714	6	0	0	25	9	0.36	51	5	0.0980392	23	0	0	1	0	0	47	0	0	20	3	0.15	81	11	0.135802
I	1018869	A-C	+	CDS	Y34D9A.11	0	0	-	83	2	0.0240964	6	0	0	28	9	0.321429	75	5	0.0666667	31	0	0	2	0	0	61	0	0	29	3	0.103448	94	11	0.117021
I	1018873	T-C	+	CDS	Y34D9A.11	0	0	-	98	2	0.0204082	6	0	0	31	9	0.290323	86	5	0.0581395	40	0	0	2	0	0	72	0	0	34	3	0.0882353	108	11	0.101852
I	1020231	A-G	-	intron	Y34D9A.1;Y34D9A.8	0	0	-	0	0	-	0	0	-	0	0	-	0	0	-	0	0	-	0	0	-	0	0	-	0	0	-	0	0	-
I	1020232	A-G	-	intron	Y34D9A.1;Y34D9A.8	0	0	-	0	0	-	0	0	-	0	0	-	0	0	-	0	0	-	0	0	-	0	0	-	0	0	-	0	0	-
I	1020253	A-G	-	intron	Y34D9A.1;Y34D9A.8	0	0	-	0	0	-	0	0	-	0	0	-	0	0	-	0	0	-	0	0	-	0	0	-	0	0	-	0	0	-
I	1020254	A-G	-	intron	Y34D9A.1;Y34D9A.8	0	0	-	0	0	-	0	0	-	0	0	-	0	0	-	0	0	-	0	0	-	0	0	-	0	0	-	0	0	-
I	1020257	A-G	-	intron	Y34D9A.1;Y34D9A.8	0	0	-	0	0	-	0	0	-	0	0	-	0	0	-	0	0	-	0	0	-	0	0	-	0	0	-	0	0	-
I	1020305	A-G	-	intron	Y34D9A.1;Y34D9A.8	0	0	-	0	0	-	0	0	-	0	0	-	0	0	-	0	0	-	0	0	-	0	0	-	0	0	-	0	0	-
I	1020306	A-G	-	intron	Y34D9A.1;Y34D9A.8	0	0	-	0	0	-	0	0	-	0	0	-	0	0	-	0	0	-	0	0	-	0	0	-	0	0	-	0	0	-
I	1020313	A-G	-	intron	Y34D9A.1;Y34D9A.8	0	0	-	0	0	-	0	0	-	0	0	-	0	0	-	0	0	-	0	0	-	0	0	-	0	0	-	0	0	-
I	1020315	A-G	-	intron	Y34D9A.1;Y34D9A.8	0	0	-	0	0	-	0	0	-	0	0	-	0	0	-	0	0	-	0	0	-	0	0	-	0	0	-	0	0	-
I	1020316	A-G	-	intron	Y34D9A.1;Y34D9A.8	0	0	-	0	0	-	0	0	-	0	0	-	0	0	-	0	0	-	0	0	-	0	0	-	0	0	-	0	0	-
I	1020322	A-G	-	intron	Y34D9A.1;Y34D9A.8	0	0	-	0	0	-	0	0	-	0	0	-	0	0	-	0	0	-	0	0	-	0	0	-	0	0	-	0	0	-
I	1020329	A-G	-	intron	Y34D9A.1;Y34D9A.8	0	0	-	0	0	-	0	0	-	0	0	-	0	0	-	0	0	-	0	0	-	0	0	-	0	0	-	0	0	-
I	1020343	A-G	-	intron	Y34D9A.1;Y34D9A.8	0	0	-	0	0	-	0	0	-	0	0	-	0	0	-	0	0	-	0	0	-	0	0	-	0	0	-	0	0	-
I	1020346	A-G	-	intron	Y34D9A.1;Y34D9A.8	0	0	-	0	0	-	0	0	-	0	0	-	0	0	-	0	0	-	0	0	-	0	0	-	0	0	-	0	0	-
I	1020369	A-G	-	intron	Y34D9A.1;Y34D9A.8	0	0	-	0	0	-	0	0	-	0	0	-	0	0	-	0	0	-	0	0	-	0	0	-	0	0	-	0	0	-
I	1020374	A-G	-	intron	Y34D9A.1;Y34D9A.8	0	0	-	0	0	-	0	0	-	0	0	-	0	0	-	0	0	-	0	0	-	0	0	-	0	0	-	0	0	-
I	1020375	A-G	-	intron	Y34D9A.1;Y34D9A.8	0	0	-	0	0	-	0	0	-	0	0	-	0	0	-	0	0	-	0	0	-	0	0	-	0	0	-	0	0	-
I	1020407	A-G	-	intron	Y34D9A.1;Y34D9A.8	0	0	-	0	0	-	0	0	-	0	0	-	0	0	-	0	0	-	0	0	-	0	0	-	0	0	-	0	0	-
I	1020416	A-G	-	intron	Y34D9A.1;Y34D9A.8	0	0	-	0	0	-	0	0	-	0	0	-	0	0	-	0	0	-	0	0	-	0	0	-	0	0	-	0	0	-
I	1020417	A-G	-	intron	Y34D9A.1;Y34D9A.8	0	0	-	0	0	-	0	0	-	0	0	-	0	0	-	0	0	-	0	0	-	0	0	-	0	0	-	0	0	-
I	1020418	A-G	-	intron	Y34D9A.1;Y34D9A.8	0	0	-	0	0	-	0	0	-	0	0	-	0	0	-	0	0	-	0	0	-	0	0	-	0	0	-	0	0	-
I	1020730	A-G	-	intron	Y34D9A.1;Y34D9A.8	0	0	-	0	0	-	0	0	-	0	0	-	0	0	-	0	0	-	0	0	-	0	0	-	0	0	-	0	0	-
I	1020742	A-G	-	intron	Y34D9A.1;Y34D9A.8	0	0	-	0	0	-	0	0	-	0	0	-	0	0	-	0	0	-	0	0	-	0	0	-	0	0	-	0	0	-
I	1020762	A-G	-	intron	Y34D9A.1;Y34D9A.8	0	0	-	0	0	-	0	0	-	0	0	-	0	0	-	0	0	-	0	0	-	0	0	-	0	0	-	0	0	-
I	1020763	A-G	-	intron	Y34D9A.1;Y34D9A.8	0	0	-	0	0	-	0	0	-	0	0	-	0	0	-	0	0	-	0	0	-	0	0	-	0	0	-	0	0	-
I	1020764	A-G	-	intron	Y34D9A.1;Y34D9A.8	0	0	-	0	0	-	0	0	-	0	0	-	0	0	-	0	0	-	0	0	-	0	0	-	0	0	-	0	0	-
I	1020777	A-G	-	intron	Y34D9A.1;Y34D9A.8	0	0	-	0	0	-	0	0	-	0	0	-	0	0	-	0	0	-	0	0	-	0	0	-	0	0	-	0	0	-
I	1020784	A-G	-	intron	Y34D9A.1;Y34D9A.8	0	0	-	0	0	-	0	0	-	0	0	-	0	0	-	0	0	-	0	0	-	0	0	-	0	0	-	0	0	-
I	1020789	A-G	-	intron	Y34D9A.1;Y34D9A.8	0	0	-	0	0	-	0	0	-	0	0	-	0	0	-	0	0	-	0	0	-	0	0	-	0	0	-	0	0	-
I	1020806	A-G	-	intron	Y34D9A.1;Y34D9A.8	0	0	-	0	0	-	0	0	-	0	0	-	0	0	-	0	0	-	0	0	-	0	0	-	0	0	-	0	0	-
I	1021486	A-G	-	intron	Y34D9A.1;Y34D9A.8	0	0	-	0	0	-	0	0	-	0	0	-	0	0	-	0	0	-	0	0	-	0	0	-	0	0	-	0	0	-
I	1021497	A-G	-	intron	Y34D9A.1;Y34D9A.8	0	0	-	0	0	-	0	0	-	0	0	-	0	0	-	0	0	-	0	0	-	0	0	-	0	0	-	0	0	-
I	1021502	A-G	-	intron	Y34D9A.1;Y34D9A.8	0	0	-	0	0	-	0	0	-	0	0	-	0	0	-	0	0	-	0	0	-	0	0	-	0	0	-	0	0	-
I	1021503	A-G	-	intron	Y34D9A.1;Y34D9A.8	0	0	-	0	0	-	0	0	-	0	0	-	0	0	-	0	0	-	0	0	-	0	0	-	0	0	-	0	0	-
I	1021738	A-G	-	intron	Y34D9A.1;Y34D9A.8	0	0	-	0	0	-	0	0	-	0	0	-	0	0	-	0	0	-	0	0	-	0	0	-	0	0	-	0	0	-
I	1021741	A-G	-	intron	Y34D9A.1;Y34D9A.8	0	0	-	0	0	-	0	0	-	0	0	-	0	0	-	0	0	-	0	0	-	0	0	-	0	0	-	0	0	-
I	1021758	A-G	-	intron	Y34D9A.1;Y34D9A.8	0	0	-	0	0	-	0	0	-	0	0	-	0	0	-	0	0	-	0	0	-	0	0	-	0	0	-	0	0	-
I	1021763	A-G	-	intron	Y34D9A.1;Y34D9A.8	0	0	-	0	0	-	0	0	-	0	0	-	0	0	-	0	0	-	0	0	-	0	0	-	0	0	-	0	0	-
I	1021764	A-G	-	intron	Y34D9A.1;Y34D9A.8	0	0	-	0	0	-	0	0	-	0	0	-	0	0	-	0	0	-	0	0	-	0	0	-	0	0	-	0	0	-
I	1021765	A-G	-	intron	Y34D9A.1;Y34D9A.8	0	0	-	0	0	-	0	0	-	0	0	-	0	0	-	0	0	-	0	0	-	0	0	-	0	0	-	0	0	-
I	1021766	A-G	-	intron	Y34D9A.1;Y34D9A.8	0	0	-	0	0	-	0	0	-	0	0	-	0	0	-	0	0	-	0	0	-	0	0	-	0	0	-	0	0	-
I	1021767	A-G	-	intron	Y34D9A.1;Y34D9A.8	0	0	-	0	0	-	0	0	-	0	0	-	0	0	-	0	0	-	0	0	-	0	0	-	0	0	-	0	0	-
I	1022394	A-G	-	intron	Y34D9A.1;Y34D9A.8	0	0	-	0	0	-	0	0	-	0	0	-	0	0	-	0	0	-	0	0	-	0	0	-	0	0	-	0	0	-
I	1022773	A-G	-	intron	Y34D9A.1;Y34D9A.8	0	0	-	0	0	-	0	0	-	0	0	-	0	0	-	0	0	-	0	0	-	0	0	-	0	0	-	0	0	-
I	1022806	A-G	-	intron	Y34D9A.1;Y34D9A.8	0	0	-	0	0	-	0	0	-	0	0	-	0	0	-	0	0	-	0	0	-	0	0	-	0	0	-	0	0	-
I	1022807	A-G	-	intron	Y34D9A.1;Y34D9A.8	0	0	-	0	0	-	0	0	-	0	0	-	0	0	-	0	0	-	0	0	-	0	0	-	0	0	-	0	0	-
I	10234186	A-G	-	downstream	Y106G6E.7	0	0	-	0	0	-	0	0	-	0	0	-	0	0	-	0	0	-	0	0	-	0	0	-	0	0	-	0	0	-
I	10234208	A-G	-	downstream	Y106G6E.7	0	0	-	0	0	-	0	0	-	0	0	-	0	0	-	0	0	-	0	0	-	0	0	-	0	0	-	0	0	-
I	10234209	A-G	-	downstream	Y106G6E.7	0	0	-	0	0	-	0	0	-	0	0	-	0	0	-	0	0	-	0	0	-	0	0	-	0	0	-	0	0	-
I	1024320	A-G	-	intron	Y34D9A.1;Y34D9A.8	0	0	-	0	0	-	0	0	-	0	0	-	0	0	-	0	0	-	0	0	-	0	0	-	0	0	-	0	0	-
I	1024341	A-G	-	intron	Y34D9A.1;Y34D9A.8	0	0	-	0	0	-	0	0	-	0	0	-	0	0	-	0	0	-	0	0	-	0	0	-	0	0	-	0	0	-
I	1024342	A-G	-	intron	Y34D9A.1;Y34D9A.8	0	0	-	0	0	-	0	0	-	0	0	-	0	0	-	0	0	-	0	0	-	0	0	-	0	0	-	0	0	-
I	1024376	A-G	-	intron	Y34D9A.1;Y34D9A.8	0	0	-	0	0	-	0	0	-	0	0	-	0	0	-	0	0	-	0	0	-	0	0	-	0	0	-	0	0	-
I	1024377	A-G	-	intron	Y34D9A.1;Y34D9A.8	0	0	-	0	0	-	0	0	-	0	0	-	0	0	-	0	0	-	0	0	-	0	0	-	0	0	-	0	0	-
I	1025045	A-G	-	intron	Y34D9A.1;Y34D9A.8	0	0	-	0	0	-	0	0	-	0	0	-	0	0	-	0	0	-	0	0	-	0	0	-	0	0	-	0	0	-
I	1025127	A-G	-	intron	Y34D9A.1;Y34D9A.8	0	0	-	0	0	-	0	0	-	0	0	-	0	0	-	0	0	-	0	0	-	0	0	-	0	0	-	0	0	-
I	1025129	A-G	-	intron	Y34D9A.1;Y34D9A.8	0	0	-	0	0	-	0	0	-	0	0	-	0	0	-	0	0	-	0	0	-	0	0	-	0	0	-	0	0	-
I	1025137	A-G	-	intron	Y34D9A.1;Y34D9A.8	0	0	-	0	0	-	0	0	-	0	0	-	0	0	-	0	0	-	0	0	-	0	0	-	0	0	-	0	0	-
I	1025400	A-G	-	intron	Y34D9A.1;Y34D9A.8	0	0	-	0	0	-	0	0	-	0	0	-	0	0	-	0	0	-	0	0	-	0	0	-	0	0	-	0	0	-
I	1025430	A-G	-	intron	Y34D9A.1;Y34D9A.8	0	0	-	0	0	-	0	0	-	0	0	-	0	0	-	0	0	-	0	0	-	0	0	-	0	0	-	0	0	-
I	1025442	A-G	-	intron	Y34D9A.1;Y34D9A.8	0	0	-	0	0	-	0	0	-	0	0	-	0	0	-	0	0	-	0	0	-	0	0	-	0	0	-	0	0	-
I	1025443	A-G	-	intron	Y34D9A.1;Y34D9A.8	0	0	-	0	0	-	0	0	-	0	0	-	0	0	-	0	0	-	0	0	-	0	0	-	0	0	-	0	0	-
I	1025447	A-G	-	intron	Y34D9A.1;Y34D9A.8	0	0	-	0	0	-	0	0	-	0	0	-	0	0	-	0	0	-	0	0	-	0	0	-	0	0	-	0	0	-
I	1025452	A-G	-	intron	Y34D9A.1;Y34D9A.8	0	0	-	0	0	-	0	0	-	0	0	-	0	0	-	0	0	-	0	0	-	0	0	-	0	0	-	0	0	-
I	1025457	A-G	-	intron	Y34D9A.1;Y34D9A.8	0	0	-	0	0	-	0	0	-	0	0	-	0	0	-	0	0	-	0	0	-	0	0	-	0	0	-	0	0	-
I	1025471	A-G	-	intron	Y34D9A.1;Y34D9A.8	0	0	-	0	0	-	0	0	-	0	0	-	0	0	-	0	0	-	0	0	-	0	0	-	0	0	-	0	0	-
I	1025472	A-G	-	intron	Y34D9A.1;Y34D9A.8	0	0	-	0	0	-	0	0	-	0	0	-	0	0	-	0	0	-	0	0	-	0	0	-	0	0	-	0	0	-
I	1025473	A-G	-	intron	Y34D9A.1;Y34D9A.8	0	0	-	0	0	-	0	0	-	0	0	-	0	0	-	0	0	-	0	0	-	0	0	-	0	0	-	0	0	-
I	1025496	A-G	-	intron	Y34D9A.1;Y34D9A.8	0	0	-	0	0	-	0	0	-	0	0	-	0	0	-	0	0	-	0	0	-	0	0	-	0	0	-	0	0	-
I	1025498	A-G	-	intron	Y34D9A.1;Y34D9A.8	0	0	-	0	0	-	0	0	-	0	0	-	0	0	-	0	0	-	0	0	-	0	0	-	0	0	-	0	0	-
I	1025503	A-G	-	intron	Y34D9A.1;Y34D9A.8	0	0	-	0	0	-	0	0	-	0	0	-	0	0	-	0	0	-	0	0	-	0	0	-	0	0	-	0	0	-
I	1025504	A-G	-	intron	Y34D9A.1;Y34D9A.8	0	0	-	0	0	-	0	0	-	0	0	-	0	0	-	0	0	-	0	0	-	0	0	-	0	0	-	0	0	-
I	1025507	A-G	-	intron	Y34D9A.1;Y34D9A.8	0	0	-	0	0	-	0	0	-	0	0	-	0	0	-	0	0	-	0	0	-	0	0	-	0	0	-	0	0	-
I	1025516	A-G	-	intron	Y34D9A.1;Y34D9A.8	0	0	-	0	0	-	0	0	-	0	0	-	0	0	-	0	0	-	0	0	-	0	0	-	0	0	-	0	0	-
I	1025520	A-G	-	intron	Y34D9A.1;Y34D9A.8	0	0	-	0	0	-	0	0	-	0	0	-	0	0	-	0	0	-	0	0	-	0	0	-	0	0	-	0	0	-
I	1025526	A-G	-	intron	Y34D9A.1;Y34D9A.8	0	0	-	0	0	-	0	0	-	0	0	-	0	0	-	0	0	-	0	0	-	0	0	-	0	0	-	0	0	-
I	1025530	A-G	-	intron	Y34D9A.1;Y34D9A.8	0	0	-	0	0	-	0	0	-	0	0	-	0	0	-	0	0	-	0	0	-	0	0	-	0	0	-	0	0	-
I	1025531	A-G	-	intron	Y34D9A.1;Y34D9A.8	0	0	-	0	0	-	0	0	-	0	0	-	0	0	-	0	0	-	0	0	-	0	0	-	0	0	-	0	0	-
I	1025540	A-G	-	intron	Y34D9A.1;Y34D9A.8	0	0	-	0	0	-	0	0	-	0	0	-	0	0	-	0	0	-	0	0	-	0	0	-	0	0	-	0	0	-
I	1025619	A-G	-	intron	Y34D9A.1;Y34D9A.8	0	0	-	0	0	-	0	0	-	0	0	-	0	0	-	0	0	-	0	0	-	0	0	-	0	0	-	0	0	-
I	1025627	A-G	-	intron	Y34D9A.1;Y34D9A.8	0	0	-	0	0	-	0	0	-	0	0	-	0	0	-	0	0	-	0	0	-	0	0	-	0	0	-	0	0	-
I	1025636	A-G	-	intron	Y34D9A.1;Y34D9A.8	0	0	-	0	0	-	0	0	-	0	0	-	0	0	-	0	0	-	0	0	-	0	0	-	0	0	-	0	0	-
I	1025642	A-G	-	intron	Y34D9A.1;Y34D9A.8	0	0	-	0	0	-	0	0	-	0	0	-	0	0	-	0	0	-	0	0	-	0	0	-	0	0	-	0	0	-
I	1025643	A-G	-	intron	Y34D9A.1;Y34D9A.8	0	0	-	0	0	-	0	0	-	0	0	-	0	0	-	0	0	-	0	0	-	0	0	-	0	0	-	0	0	-
I	1025647	A-G	-	intron	Y34D9A.1;Y34D9A.8	0	0	-	0	0	-	0	0	-	0	0	-	0	0	-	0	0	-	0	0	-	0	0	-	0	0	-	0	0	-
I	1025683	A-G	-	intron	Y34D9A.1;Y34D9A.8	0	0	-	0	0	-	0	0	-	0	0	-	0	0	-	0	0	-	0	0	-	0	0	-	0	0	-	0	0	-
I	1025687	A-G	-	intron	Y34D9A.1;Y34D9A.8	0	0	-	0	0	-	0	0	-	0	0	-	0	0	-	0	0	-	0	0	-	0	0	-	0	0	-	0	0	-
I	1025696	A-G	-	intron	Y34D9A.1;Y34D9A.8	0	0	-	0	0	-	0	0	-	0	0	-	0	0	-	0	0	-	0	0	-	0	0	-	0	0	-	0	0	-
I	1025718	A-G	-	intron	Y34D9A.1;Y34D9A.8	0	0	-	0	0	-	0	0	-	0	0	-	0	0	-	0	0	-	0	0	-	0	0	-	0	0	-	0	0	-
I	1025816	A-G	-	intron	Y34D9A.1;Y34D9A.8	0	0	-	0	0	-	0	0	-	0	0	-	0	0	-	0	0	-	0	0	-	0	0	-	0	0	-	0	0	-
I	1025829	A-G	-	intron	Y34D9A.1;Y34D9A.8	0	0	-	0	0	-	0	0	-	0	0	-	0	0	-	0	0	-	0	0	-	0	0	-	0	0	-	0	0	-
I	1025833	A-G	-	intron	Y34D9A.1;Y34D9A.8	0	0	-	0	0	-	0	0	-	0	0	-	0	0	-	0	0	-	0	0	-	0	0	-	0	0	-	0	0	-
I	1025842	A-G	-	intron	Y34D9A.1;Y34D9A.8	0	0	-	0	0	-	0	0	-	0	0	-	0	0	-	0	0	-	0	0	-	0	0	-	0	0	-	0	0	-
I	1025864	A-G	-	intron	Y34D9A.1;Y34D9A.8	0	0	-	0	0	-	0	0	-	0	0	-	0	0	-	0	0	-	0	0	-	0	0	-	0	0	-	0	0	-
I	1025875	A-G	-	intron	Y34D9A.1;Y34D9A.8	0	0	-	0	0	-	0	0	-	0	0	-	0	0	-	0	0	-	0	0	-	0	0	-	0	0	-	0	0	-
I	1025880	A-G	-	intron	Y34D9A.1;Y34D9A.8	0	0	-	0	0	-	0	0	-	0	0	-	0	0	-	0	0	-	0	0	-	0	0	-	0	0	-	0	0	-
I	1025882	A-G	-	intron	Y34D9A.1;Y34D9A.8	0	0	-	0	0	-	0	0	-	0	0	-	0	0	-	0	0	-	0	0	-	0	0	-	0	0	-	0	0	-
I	1025885	A-G	-	intron	Y34D9A.1;Y34D9A.8	0	0	-	0	0	-	0	0	-	0	0	-	0	0	-	0	0	-	0	0	-	0	0	-	0	0	-	0	0	-
I	1025893	A-G	-	intron	Y34D9A.1;Y34D9A.8	0	0	-	0	0	-	0	0	-	0	0	-	0	0	-	0	0	-	0	0	-	0	0	-	0	0	-	0	0	-
I	1025931	A-G	-	intron	Y34D9A.1;Y34D9A.8	0	0	-	0	0	-	0	0	-	0	0	-	0	0	-	0	0	-	0	0	-	0	0	-	0	0	-	0	0	-
I	1025942	A-G	-	intron	Y34D9A.1;Y34D9A.8	0	0	-	0	0	-	0	0	-	0	0	-	0	0	-	0	0	-	0	0	-	0	0	-	0	0	-	0	0	-
I	1025949	A-G	-	intron	Y34D9A.1;Y34D9A.8	0	0	-	0	0	-	0	0	-	0	0	-	0	0	-	0	0	-	0	0	-	0	0	-	0	0	-	0	0	-
I	1025957	A-G	-	intron	Y34D9A.1;Y34D9A.8	0	0	-	0	0	-	0	0	-	0	0	-	0	0	-	0	0	-	0	0	-	0	0	-	0	0	-	0	0	-
I	1025969	A-G	-	intron	Y34D9A.1;Y34D9A.8	0	0	-	0	0	-	0	0	-	0	0	-	0	0	-	0	0	-	0	0	-	0	0	-	0	0	-	0	0	-
I	10268368	A-C	-	CDS	ZC247.1	0	0	-	0	0	-	0	0	-	0	0	-	0	0	-	0	0	-	0	0	-	0	0	-	0	0	-	0	0	-
I	10268680	C-T	-	CDS	ZC247.1	0	0	-	0	0	-	0	0	-	0	0	-	0	0	-	0	0	-	0	0	-	0	0	-	0	0	-	0	0	-
I	10270298	A-C	-	CDS	ZC247.1	0	0	-	0	0	-	0	0	-	0	0	-	0	0	-	0	0	-	0	0	-	0	0	-	0	0	-	0	0	-
I	1031165	A-G	-	intron	Y34D9A.4;Y34D9A.8	0	0	-	0	0	-	0	0	-	0	0	-	1	0	0	0	0	-	0	0	-	0	0	-	0	0	-	0	0	-
I	1031168	A-G	-	intron	Y34D9A.4;Y34D9A.8	0	0	-	0	0	-	0	0	-	0	0	-	1	0	0	0	0	-	0	0	-	0	0	-	0	0	-	0	0	-
I	1031169	A-G	-	intron	Y34D9A.4;Y34D9A.8	0	0	-	0	0	-	0	0	-	0	0	-	1	0	0	0	0	-	0	0	-	0	0	-	0	0	-	0	0	-
I	1031171	A-G	-	intron	Y34D9A.4;Y34D9A.8	0	0	-	0	0	-	0	0	-	0	0	-	1	0	0	0	0	-	0	0	-	0	0	-	0	0	-	0	0	-
I	1031172	A-G	-	intron	Y34D9A.4;Y34D9A.8	0	0	-	0	0	-	0	0	-	0	0	-	1	0	0	0	0	-	0	0	-	0	0	-	0	0	-	0	0	-
I	1031182	A-G	-	intron	Y34D9A.4;Y34D9A.8	0	0	-	1	0	0	0	0	-	1	0	0	1	0	0	0	0	-	0	0	-	0	0	-	0	0	-	0	0	-
I	1031194	A-G	-	intron	Y34D9A.4;Y34D9A.8	0	0	-	1	0	0	0	0	-	1	0	0	1	0	0	0	0	-	0	0	-	0	0	-	0	0	-	0	0	-
I	1031196	A-G	+	antisense	Y34D9A.4;Y34D9A.8	0	0	-	1	1	1	0	0	-	1	1	1	1	1	1	0	0	-	0	0	-	0	0	-	0	0	-	0	0	-
I	1031199	A-G	+	antisense	Y34D9A.4;Y34D9A.8	0	0	-	1	1	1	0	0	-	1	1	1	1	0	0	0	0	-	0	0	-	0	0	-	0	0	-	0	0	-
I	1031202	A-G	-	intron	Y34D9A.4;Y34D9A.8	0	0	-	1	0	0	0	0	-	1	0	0	1	0	0	0	0	-	0	0	-	0	0	-	0	0	-	0	0	-
I	1031205	A-G	+	antisense	Y34D9A.4;Y34D9A.8	0	0	-	1	1	1	0	0	-	1	1	1	1	1	1	0	0	-	0	0	-	0	0	-	0	0	-	0	0	-
I	1031206	A-G	+	antisense	Y34D9A.4;Y34D9A.8	0	0	-	1	1	1	0	0	-	1	1	1	1	1	1	0	0	-	0	0	-	0	0	-	0	0	-	0	0	-
I	1031207	A-G	+	antisense	Y34D9A.4;Y34D9A.8	0	0	-	1	0	0	0	0	-	1	1	1	1	1	1	0	0	-	0	0	-	0	0	-	0	0	-	0	0	-
I	1031208	A-G	+	antisense	Y34D9A.4;Y34D9A.8	0	0	-	1	1	1	0	0	-	1	1	1	1	1	1	0	0	-	0	0	-	0	0	-	0	0	-	0	0	-
I	1031209	A-G	-	intron	Y34D9A.4;Y34D9A.8	0	0	-	1	0	0	0	0	-	1	0	0	1	0	0	0	0	-	0	0	-	0	0	-	0	0	-	0	0	-
I	1031210	A-G	-	intron	Y34D9A.4;Y34D9A.8	0	0	-	1	0	0	0	0	-	1	0	0	1	0	0	0	0	-	0	0	-	0	0	-	0	0	-	0	0	-
I	1031211	A-G	-	intron	Y34D9A.4;Y34D9A.8	0	0	-	1	0	0	0	0	-	1	0	0	1	0	0	0	0	-	0	0	-	0	0	-	0	0	-	0	0	-
I	1031220	A-G	-	intron	Y34D9A.4;Y34D9A.8	0	0	-	1	0	0	0	0	-	1	0	0	1	0	0	0	0	-	0	0	-	0	0	-	0	0	-	0	0	-
I	1031223	A-G	-	intron	Y34D9A.4;Y34D9A.8	0	0	-	1	0	0	0	0	-	1	0	0	1	0	0	0	0	-	0	0	-	0	0	-	0	0	-	0	0	-
I	1031246	A-G	-	intron	Y34D9A.4;Y34D9A.8	0	0	-	1	0	0	0	0	-	1	0	0	1	0	0	0	0	-	0	0	-	0	0	-	1	0	0	1	0	0
I	1031262	A-G	-	intron	Y34D9A.4;Y34D9A.8	0	0	-	1	0	0	0	0	-	1	0	0	1	0	0	0	0	-	0	0	-	0	0	-	1	0	0	1	0	0
I	1031264	A-G	-	intron	Y34D9A.4;Y34D9A.8	0	0	-	1	0	0	0	0	-	1	0	0	1	0	0	0	0	-	0	0	-	0	0	-	1	0	0	1	0	0
I	1031265	A-G	+	antisense	Y34D9A.4;Y34D9A.8	0	0	-	1	1	1	0	0	-	1	1	1	0	0	-	0	0	-	0	0	-	0	0	-	1	1	1	1	0	0
I	1031271	A-G	-	intron	Y34D9A.4;Y34D9A.8	0	0	-	1	0	0	0	0	-	1	0	0	0	0	-	0	0	-	0	0	-	0	0	-	1	0	0	1	0	0
I	1031292	A-G	-	intron	Y34D9A.4;Y34D9A.8	0	0	-	1	0	0	0	0	-	1	0	0	1	0	0	0	0	-	0	0	-	0	0	-	1	0	0	1	0	0
I	1031293	A-G	+	antisense	Y34D9A.4;Y34D9A.8	0	0	-	1	0	0	0	0	-	1	0	0	1	0	0	0	0	-	0	0	-	0	0	-	1	1	1	1	1	1
I	1031294	A-G	+	antisense	Y34D9A.4;Y34D9A.8	0	0	-	1	1	1	0	0	-	1	1	1	1	0	0	0	0	-	0	0	-	0	0	-	1	1	1	1	1	1
I	1031300	A-G	-	intron	Y34D9A.4;Y34D9A.8	0	0	-	1	0	0	0	0	-	1	0	0	1	0	0	0	0	-	0	0	-	0	0	-	1	0	0	1	0	0
I	1031301	A-G	-	intron	Y34D9A.4;Y34D9A.8	0	0	-	1	0	0	0	0	-	1	0	0	1	0	0	0	0	-	0	0	-	0	0	-	1	0	0	1	0	0
I	1031312	A-G	+	antisense	Y34D9A.4;Y34D9A.8	0	0	-	1	1	1	0	0	-	1	1	1	1	1	1	0	0	-	0	0	-	0	0	-	1	1	1	1	1	1
I	1031320	A-G	-	intron	Y34D9A.4;Y34D9A.8	0	0	-	1	0	0	0	0	-	1	0	0	1	0	0	0	0	-	0	0	-	0	0	-	1	0	0	1	0	0
I	1031322	A-G	+	antisense	Y34D9A.4;Y34D9A.8	0	0	-	1	1	1	0	0	-	1	1	1	1	0	0	0	0	-	0	0	-	0	0	-	1	0	0	1	0	0
I	1031323	A-G	+	antisense	Y34D9A.4;Y34D9A.8	0	0	-	1	1	1	0	0	-	1	1	1	1	1	1	0	0	-	0	0	-	0	0	-	1	0	0	1	0	0
I	1031324	A-G	+	antisense	Y34D9A.4;Y34D9A.8	0	0	-	1	1	1	0	0	-	1	1	1	1	0	0	0	0	-	0	0	-	0	0	-	1	1	1	1	0	0
I	1031330	A-G	-	intron	Y34D9A.4;Y34D9A.8	0	0	-	1	0	0	0	0	-	1	0	0	1	0	0	0	0	-	0	0	-	0	0	-	1	0	0	1	0	0
I	1031331	A-G	+	antisense	Y34D9A.4;Y34D9A.8	0	0	-	1	1	1	0	0	-	1	0	0	1	0	0	0	0	-	0	0	-	0	0	-	1	1	1	1	1	1
I	1031332	A-G	+	antisense	Y34D9A.4;Y34D9A.8	0	0	-	1	1	1	0	0	-	1	1	1	1	0	0	0	0	-	0	0	-	0	0	-	1	1	1	1	0	0
I	1031337	A-G	+	antisense	Y34D9A.4;Y34D9A.8	0	0	-	1	1	1	0	0	-	1	1	1	1	1	1	0	0	-	0	0	-	0	0	-	1	1	1	1	1	1
I	1031366	A-G	+	antisense	Y34D9A.4;Y34D9A.8	0	0	-	0	0	-	0	0	-	1	1	1	1	1	1	0	0	-	0	0	-	0	0	-	1	1	1	1	1	1
I	1031371	A-G	+	antisense	Y34D9A.4;Y34D9A.8	0	0	-	0	0	-	0	0	-	1	1	1	1	1	1	0	0	-	0	0	-	0	0	-	1	0	0	1	1	1
I	1031374	A-G	+	antisense	Y34D9A.4;Y34D9A.8	0	0	-	0	0	-	0	0	-	1	1	1	1	1	1	0	0	-	0	0	-	0	0	-	1	1	1	1	0	0
I	1031375	A-G	+	antisense	Y34D9A.4;Y34D9A.8	0	0	-	0	0	-	0	0	-	1	1	1	1	1	1	0	0	-	0	0	-	0	0	-	1	1	1	1	1	1
I	1031391	A-G	+	antisense	Y34D9A.4;Y34D9A.8	0	0	-	0	0	-	0	0	-	0	0	-	0	0	-	0	0	-	0	0	-	0	0	-	1	1	1	1	1	1
I	1031404	A-G	+	antisense	Y34D9A.4;Y34D9A.8	0	0	-	0	0	-	0	0	-	0	0	-	0	0	-	0	0	-	0	0	-	0	0	-	1	1	1	1	1	1
I	1031864	A-G	-	intron	Y34D9A.4;Y34D9A.8	0	0	-	0	0	-	0	0	-	0	0	-	0	0	-	0	0	-	0	0	-	0	0	-	0	0	-	0	0	-
I	1031865	A-G	-	intron	Y34D9A.4;Y34D9A.8	0	0	-	0	0	-	0	0	-	0	0	-	0	0	-	0	0	-	0	0	-	0	0	-	0	0	-	0	0	-
I	1031868	A-G	-	intron	Y34D9A.4;Y34D9A.8	0	0	-	0	0	-	0	0	-	0	0	-	0	0	-	0	0	-	0	0	-	0	0	-	0	0	-	0	0	-
I	1031891	A-G	-	intron	Y34D9A.4;Y34D9A.8	0	0	-	0	0	-	0	0	-	0	0	-	0	0	-	0	0	-	0	0	-	0	0	-	0	0	-	0	0	-
I	1031898	A-G	-	intron	Y34D9A.4;Y34D9A.8	0	0	-	0	0	-	0	0	-	0	0	-	0	0	-	0	0	-	0	0	-	0	0	-	0	0	-	0	0	-
I	1040031	A-G	-	intron	Y34D9A.8	0	0	-	0	0	-	0	0	-	0	0	-	0	0	-	0	0	-	0	0	-	0	0	-	0	0	-	0	0	-
I	1040037	A-G	-	intron	Y34D9A.8	0	0	-	0	0	-	0	0	-	0	0	-	0	0	-	0	0	-	0	0	-	0	0	-	0	0	-	0	0	-
I	10468996	A-G	-	intron	Y106G6H.12	0	0	-	0	0	-	0	0	-	0	0	-	0	0	-	0	0	-	0	0	-	0	0	-	0	0	-	0	0	-
I	10469011	A-G	-	intron	Y106G6H.12	0	0	-	0	0	-	0	0	-	0	0	-	0	0	-	0	0	-	0	0	-	0	0	-	0	0	-	0	0	-
I	10469026	A-G	-	intron	Y106G6H.12	0	0	-	0	0	-	0	0	-	0	0	-	0	0	-	0	0	-	0	0	-	0	0	-	0	0	-	0	0	-
I	104821	A-G	-	intron	Y48G1C.8	0	0	-	0	0	-	0	0	-	0	0	-	0	0	-	0	0	-	0	0	-	0	0	-	0	0	-	0	0	-
I	104822	A-G	-	intron	Y48G1C.8	0	0	-	0	0	-	0	0	-	0	0	-	0	0	-	0	0	-	0	0	-	0	0	-	0	0	-	0	0	-
I	104828	A-G	-	intron	Y48G1C.8	0	0	-	0	0	-	0	0	-	0	0	-	0	0	-	0	0	-	0	0	-	0	0	-	0	0	-	0	0	-
I	104853	A-G	-	intron	Y48G1C.8	0	0	-	0	0	-	0	0	-	0	0	-	0	0	-	0	0	-	0	0	-	0	0	-	0	0	-	0	0	-
I	104854	A-G	-	intron	Y48G1C.8	0	0	-	0	0	-	0	0	-	0	0	-	0	0	-	0	0	-	0	0	-	0	0	-	0	0	-	0	0	-
I	104867	A-G	-	intron	Y48G1C.8	0	0	-	0	0	-	0	0	-	0	0	-	0	0	-	0	0	-	0	0	-	0	0	-	0	0	-	0	0	-
I	104872	A-G	-	intron	Y48G1C.8	0	0	-	0	0	-	0	0	-	0	0	-	0	0	-	0	0	-	0	0	-	0	0	-	0	0	-	0	0	-
I	1050777	A-G	-	3UTR/intron	Y34D9A.8	0	0	-	0	0	-	0	0	-	0	0	-	0	0	-	0	0	-	0	0	-	0	0	-	0	0	-	0	0	-
I	1051634	A-G	-	intron	Y34D9A.8	0	0	-	0	0	-	0	0	-	0	0	-	0	0	-	0	0	-	0	0	-	3	0	0	0	0	-	0	0	-
I	1051635	A-G	+	downstream	Y34D9A.6	0	0	-	0	0	-	0	0	-	0	0	-	0	0	-	0	0	-	0	0	-	3	2	0.666667	0	0	-	0	0	-
I	1053015	A-G	-	intron	Y34D9A.8	1	0	0	1	0	0	1	0	0	1	0	0	0	0	-	0	0	-	0	0	-	0	0	-	1	0	0	0	0	-
I	1053016	A-G	-	intron	Y34D9A.8	1	0	0	1	0	0	1	0	0	1	0	0	0	0	-	0	0	-	0	0	-	0	0	-	1	0	0	0	0	-
I	1053025	A-G	-	intron	Y34D9A.8	1	0	0	1	0	0	0	0	-	1	0	0	0	0	-	0	0	-	0	0	-	0	0	-	1	0	0	0	0	-
I	1053071	A-G	-	intron	Y34D9A.8	1	0	0	0	0	-	0	0	-	0	0	-	0	0	-	0	0	-	0	0	-	0	0	-	1	0	0	0	0	-
I	1053974	A-G	-	3UTR/intron	Y34D9A.10	0	0	-	1	0	0	1	0	0	1	0	0	0	0	-	1	0	0	1	0	0	1	0	0	0	0	-	0	0	-
I	10550559	A-G	+	downstream	F25H2.3	0	0	-	1	1	1	0	0	-	1	1	1	0	0	-	0	0	-	0	0	-	0	0	-	0	0	-	0	0	-
I	10550580	A-G	+	downstream	F25H2.3	0	0	-	1	1	1	0	0	-	1	1	1	0	0	-	0	0	-	0	0	-	0	0	-	0	0	-	0	0	-
I	10550585	A-G	+	downstream	F25H2.3	0	0	-	1	1	1	0	0	-	1	1	1	0	0	-	0	0	-	0	0	-	0	0	-	0	0	-	0	0	-
I	10550586	A-G	+	downstream	F25H2.3	0	0	-	1	1	1	0	0	-	1	1	1	0	0	-	0	0	-	0	0	-	0	0	-	0	0	-	0	0	-
I	10550615	A-G	+	downstream	F25H2.3	0	0	-	1	1	1	0	0	-	1	1	1	0	0	-	0	0	-	0	0	-	0	0	-	0	0	-	0	0	-
I	10550659	A-G	+	downstream	F25H2.3	0	0	-	2	1	0.5	0	0	-	1	1	1	0	0	-	0	0	-	0	0	-	0	0	-	0	0	-	0	0	-
I	1056550	A-G	-	intron	Y34D9A.10	0	0	-	0	0	-	0	0	-	0	0	-	0	0	-	0	0	-	0	0	-	0	0	-	0	0	-	0	0	-
I	1056560	A-G	-	intron	Y34D9A.10	0	0	-	0	0	-	0	0	-	0	0	-	0	0	-	0	0	-	0	0	-	0	0	-	0	0	-	0	0	-
I	1056583	A-G	-	intron	Y34D9A.10	0	0	-	0	0	-	0	0	-	0	0	-	0	0	-	0	0	-	0	0	-	0	0	-	0	0	-	0	0	-
I	1056614	A-G	-	intron	Y34D9A.10	0	0	-	0	0	-	0	0	-	0	0	-	0	0	-	0	0	-	0	0	-	0	0	-	0	0	-	0	0	-
I	1056619	A-G	-	intron	Y34D9A.10	0	0	-	0	0	-	0	0	-	0	0	-	0	0	-	0	0	-	0	0	-	0	0	-	0	0	-	0	0	-
I	1056625	A-G	-	intron	Y34D9A.10	0	0	-	0	0	-	0	0	-	0	0	-	0	0	-	0	0	-	0	0	-	0	0	-	0	0	-	0	0	-
I	1056626	A-G	-	intron	Y34D9A.10	0	0	-	0	0	-	0	0	-	0	0	-	0	0	-	0	0	-	0	0	-	0	0	-	0	0	-	0	0	-
I	1056632	A-G	-	intron	Y34D9A.10	0	0	-	0	0	-	0	0	-	0	0	-	0	0	-	0	0	-	0	0	-	0	0	-	0	0	-	0	0	-
I	1056637	A-G	-	intron	Y34D9A.10	0	0	-	0	0	-	0	0	-	0	0	-	0	0	-	0	0	-	0	0	-	0	0	-	0	0	-	0	0	-
I	1056638	A-G	-	intron	Y34D9A.10	0	0	-	0	0	-	0	0	-	0	0	-	0	0	-	0	0	-	0	0	-	0	0	-	0	0	-	0	0	-
I	1056652	A-G	-	intron	Y34D9A.10	0	0	-	0	0	-	0	0	-	0	0	-	0	0	-	0	0	-	0	0	-	0	0	-	0	0	-	0	0	-
I	1056653	A-G	-	intron	Y34D9A.10	0	0	-	0	0	-	0	0	-	0	0	-	0	0	-	0	0	-	0	0	-	0	0	-	0	0	-	0	0	-
I	1056739	A-G	-	intron	Y34D9A.10	0	0	-	0	0	-	0	0	-	0	0	-	0	0	-	0	0	-	0	0	-	0	0	-	0	0	-	0	0	-
I	1056772	A-G	-	intron	Y34D9A.10	0	0	-	0	0	-	0	0	-	0	0	-	0	0	-	0	0	-	0	0	-	0	0	-	0	0	-	0	0	-
I	1056773	A-G	-	intron	Y34D9A.10	0	0	-	0	0	-	0	0	-	0	0	-	0	0	-	0	0	-	0	0	-	0	0	-	0	0	-	0	0	-
I	1056790	A-G	-	intron	Y34D9A.10	0	0	-	0	0	-	0	0	-	0	0	-	0	0	-	0	0	-	0	0	-	0	0	-	0	0	-	0	0	-
I	1056797	A-G	-	intron	Y34D9A.10	0	0	-	0	0	-	0	0	-	0	0	-	0	0	-	0	0	-	0	0	-	0	0	-	0	0	-	0	0	-
I	1056799	A-G	-	intron	Y34D9A.10	0	0	-	0	0	-	0	0	-	0	0	-	0	0	-	0	0	-	0	0	-	0	0	-	0	0	-	0	0	-
I	1056801	A-G	-	intron	Y34D9A.10	0	0	-	0	0	-	0	0	-	0	0	-	0	0	-	0	0	-	0	0	-	0	0	-	0	0	-	0	0	-
I	1056802	A-G	-	intron	Y34D9A.10	0	0	-	0	0	-	0	0	-	0	0	-	0	0	-	0	0	-	0	0	-	0	0	-	0	0	-	0	0	-
I	1056813	A-G	-	intron	Y34D9A.10	0	0	-	0	0	-	0	0	-	0	0	-	0	0	-	0	0	-	0	0	-	0	0	-	0	0	-	0	0	-
I	1056840	A-G	-	intron	Y34D9A.10	0	0	-	0	0	-	0	0	-	0	0	-	0	0	-	0	0	-	0	0	-	0	0	-	0	0	-	0	0	-
I	1056841	A-G	-	intron	Y34D9A.10	0	0	-	0	0	-	0	0	-	0	0	-	0	0	-	0	0	-	0	0	-	0	0	-	0	0	-	0	0	-
I	1058148	A-G	-	intron	Y34D9A.10	0	0	-	0	0	-	0	0	-	0	0	-	0	0	-	0	0	-	0	0	-	0	0	-	0	0	-	0	0	-
I	1058162	A-G	-	intron	Y34D9A.10	0	0	-	0	0	-	0	0	-	0	0	-	0	0	-	0	0	-	0	0	-	0	0	-	0	0	-	0	0	-
I	1058163	A-G	-	intron	Y34D9A.10	0	0	-	0	0	-	0	0	-	0	0	-	0	0	-	0	0	-	0	0	-	0	0	-	0	0	-	0	0	-
I	1058164	A-G	-	intron	Y34D9A.10	0	0	-	0	0	-	0	0	-	0	0	-	0	0	-	0	0	-	0	0	-	0	0	-	0	0	-	0	0	-
I	1058165	A-G	-	intron	Y34D9A.10	0	0	-	0	0	-	0	0	-	0	0	-	0	0	-	0	0	-	0	0	-	0	0	-	0	0	-	0	0	-
I	1058167	A-G	-	intron	Y34D9A.10	0	0	-	0	0	-	0	0	-	0	0	-	0	0	-	0	0	-	0	0	-	0	0	-	0	0	-	0	0	-
I	1058173	A-G	-	intron	Y34D9A.10	0	0	-	0	0	-	0	0	-	0	0	-	0	0	-	0	0	-	0	0	-	0	0	-	0	0	-	0	0	-
I	1058174	A-G	-	intron	Y34D9A.10	0	0	-	0	0	-	0	0	-	0	0	-	0	0	-	0	0	-	0	0	-	0	0	-	0	0	-	0	0	-
I	1058189	A-G	-	intron	Y34D9A.10	0	0	-	0	0	-	0	0	-	0	0	-	0	0	-	0	0	-	0	0	-	0	0	-	0	0	-	0	0	-
I	1058190	A-G	-	intron	Y34D9A.10	0	0	-	0	0	-	0	0	-	0	0	-	0	0	-	0	0	-	0	0	-	0	0	-	0	0	-	0	0	-
I	1058191	A-G	-	intron	Y34D9A.10	0	0	-	0	0	-	0	0	-	0	0	-	0	0	-	0	0	-	0	0	-	0	0	-	0	0	-	0	0	-
I	1058196	A-G	-	intron	Y34D9A.10	0	0	-	0	0	-	0	0	-	0	0	-	0	0	-	0	0	-	0	0	-	0	0	-	0	0	-	0	0	-
I	1058203	A-G	-	intron	Y34D9A.10	0	0	-	0	0	-	0	0	-	0	0	-	0	0	-	0	0	-	0	0	-	0	0	-	0	0	-	0	0	-
I	1058207	A-G	-	intron	Y34D9A.10	0	0	-	0	0	-	0	0	-	0	0	-	0	0	-	0	0	-	0	0	-	0	0	-	0	0	-	0	0	-
I	1058212	A-G	-	intron	Y34D9A.10	0	0	-	0	0	-	0	0	-	0	0	-	0	0	-	0	0	-	0	0	-	0	0	-	0	0	-	0	0	-
I	1058222	A-G	-	intron	Y34D9A.10	0	0	-	0	0	-	0	0	-	0	0	-	0	0	-	0	0	-	0	0	-	0	0	-	0	0	-	0	0	-
I	1058227	A-G	-	intron	Y34D9A.10	0	0	-	0	0	-	0	0	-	0	0	-	0	0	-	0	0	-	0	0	-	0	0	-	0	0	-	0	0	-
I	1058228	A-G	-	intron	Y34D9A.10	0	0	-	0	0	-	0	0	-	0	0	-	0	0	-	0	0	-	0	0	-	0	0	-	0	0	-	0	0	-
I	1058245	A-G	-	intron	Y34D9A.10	0	0	-	0	0	-	0	0	-	0	0	-	0	0	-	0	0	-	0	0	-	0	0	-	0	0	-	0	0	-
I	1058246	A-G	-	intron	Y34D9A.10	0	0	-	0	0	-	0	0	-	0	0	-	0	0	-	0	0	-	0	0	-	0	0	-	0	0	-	0	0	-
I	1058252	A-G	-	intron	Y34D9A.10	0	0	-	0	0	-	0	0	-	0	0	-	0	0	-	0	0	-	0	0	-	0	0	-	0	0	-	0	0	-
I	1058255	A-G	-	intron	Y34D9A.10	0	0	-	0	0	-	0	0	-	0	0	-	0	0	-	0	0	-	0	0	-	0	0	-	0	0	-	0	0	-
I	1058256	A-G	-	intron	Y34D9A.10	0	0	-	0	0	-	0	0	-	0	0	-	0	0	-	0	0	-	0	0	-	0	0	-	0	0	-	0	0	-
I	1058262	A-G	-	intron	Y34D9A.10	0	0	-	0	0	-	0	0	-	0	0	-	0	0	-	0	0	-	0	0	-	0	0	-	0	0	-	0	0	-
I	1058270	A-G	-	intron	Y34D9A.10	0	0	-	0	0	-	0	0	-	0	0	-	0	0	-	0	0	-	0	0	-	0	0	-	0	0	-	0	0	-
I	1058275	A-G	-	intron	Y34D9A.10	0	0	-	0	0	-	0	0	-	0	0	-	0	0	-	0	0	-	0	0	-	0	0	-	0	0	-	0	0	-
I	1058278	A-G	-	intron	Y34D9A.10	0	0	-	0	0	-	0	0	-	0	0	-	0	0	-	0	0	-	0	0	-	0	0	-	0	0	-	0	0	-
I	1058499	A-G	-	intron	Y34D9A.10	0	0	-	0	0	-	0	0	-	0	0	-	0	0	-	0	0	-	0	0	-	0	0	-	0	0	-	0	0	-
I	1058509	A-G	-	intron	Y34D9A.10	0	0	-	0	0	-	0	0	-	0	0	-	0	0	-	0	0	-	0	0	-	0	0	-	0	0	-	0	0	-
I	1058548	A-G	-	intron	Y34D9A.10	0	0	-	0	0	-	0	0	-	0	0	-	0	0	-	0	0	-	0	0	-	0	0	-	0	0	-	0	0	-
I	1058565	A-G	-	intron	Y34D9A.10	0	0	-	0	0	-	0	0	-	0	0	-	0	0	-	0	0	-	0	0	-	0	0	-	0	0	-	0	0	-
I	1058575	A-G	-	intron	Y34D9A.10	0	0	-	0	0	-	0	0	-	0	0	-	0	0	-	0	0	-	0	0	-	0	0	-	0	0	-	0	0	-
I	1058590	A-G	-	intron	Y34D9A.10	0	0	-	0	0	-	0	0	-	0	0	-	0	0	-	0	0	-	0	0	-	0	0	-	0	0	-	0	0	-
I	1058643	A-G	-	intron	Y34D9A.10	0	0	-	0	0	-	0	0	-	0	0	-	0	0	-	0	0	-	0	0	-	0	0	-	0	0	-	0	0	-
I	1058649	A-G	-	intron	Y34D9A.10	0	0	-	0	0	-	0	0	-	0	0	-	0	0	-	0	0	-	0	0	-	0	0	-	0	0	-	0	0	-
I	1058670	A-G	-	intron	Y34D9A.10	0	0	-	0	0	-	0	0	-	0	0	-	0	0	-	0	0	-	0	0	-	0	0	-	0	0	-	0	0	-
I	1058671	A-G	-	intron	Y34D9A.10	0	0	-	0	0	-	0	0	-	0	0	-	0	0	-	0	0	-	0	0	-	0	0	-	0	0	-	0	0	-
I	10636360	A-G	-	downstream/upstream	B0511.13;B0511.8	0	0	-	0	0	-	0	0	-	0	0	-	0	0	-	0	0	-	0	0	-	0	0	-	0	0	-	0	0	-
I	1064093	A-G	-	intron	Y34D9A.10	0	0	-	0	0	-	0	0	-	0	0	-	0	0	-	0	0	-	0	0	-	1	0	0	0	0	-	0	0	-
I	1064115	A-G	-	intron	Y34D9A.10	0	0	-	0	0	-	0	0	-	0	0	-	0	0	-	0	0	-	0	0	-	0	0	-	0	0	-	0	0	-
I	1064120	A-G	-	intron	Y34D9A.10	0	0	-	0	0	-	0	0	-	0	0	-	0	0	-	0	0	-	0	0	-	0	0	-	0	0	-	0	0	-
I	1064125	A-G	-	intron	Y34D9A.10	0	0	-	0	0	-	0	0	-	0	0	-	0	0	-	0	0	-	0	0	-	0	0	-	0	0	-	0	0	-
I	1064130	A-G	-	intron	Y34D9A.10	0	0	-	0	0	-	0	0	-	0	0	-	0	0	-	0	0	-	0	0	-	0	0	-	0	0	-	0	0	-
I	1064131	A-G	-	intron	Y34D9A.10	0	0	-	0	0	-	0	0	-	0	0	-	0	0	-	0	0	-	0	0	-	0	0	-	0	0	-	0	0	-
I	1064138	A-G	-	intron	Y34D9A.10	0	0	-	0	0	-	0	0	-	0	0	-	0	0	-	0	0	-	0	0	-	0	0	-	0	0	-	0	0	-
I	1065182	A-G	+	3UTR	Y34D9A.2	8	0	0	13	0	0	5	0	0	4	0	0	2	0	0	2	0	0	10	1	0.1	57	7	0.122807	10	0	0	6	0	0
I	10728323	A-G	-	intron	B0205.13	0	0	-	0	0	-	0	0	-	0	0	-	0	0	-	0	0	-	0	0	-	0	0	-	0	0	-	0	0	-
I	10728325	A-G	-	intron	B0205.13	0	0	-	0	0	-	0	0	-	0	0	-	0	0	-	0	0	-	0	0	-	0	0	-	0	0	-	0	0	-
I	10731945	A-G	+	downstream	B0205.12	0	0	-	2	2	1	0	0	-	0	0	-	0	0	-	0	0	-	0	0	-	1	0	0	0	0	-	0	0	-
I	10731953	A-G	+	downstream	B0205.12	0	0	-	2	2	1	0	0	-	0	0	-	0	0	-	0	0	-	0	0	-	1	0	0	0	0	-	0	0	-
I	10731965	A-G	+	downstream	B0205.12	0	0	-	2	2	1	0	0	-	0	0	-	0	0	-	0	0	-	0	0	-	1	1	1	0	0	-	0	0	-
I	10731966	A-G	+	downstream	B0205.12	0	0	-	2	2	1	0	0	-	0	0	-	0	0	-	0	0	-	0	0	-	1	1	1	0	0	-	0	0	-
I	10731970	A-G	+	downstream	B0205.12	0	0	-	2	2	1	0	0	-	0	0	-	0	0	-	0	0	-	0	0	-	1	0	0	0	0	-	0	0	-
I	10732061	A-G	+	downstream	B0205.12	0	0	-	2	2	1	0	0	-	0	0	-	0	0	-	1	1	1	0	0	-	1	0	0	0	0	-	0	0	-
I	10748058	A-G	+	upstream	H36N01.4	0	0	-	0	0	-	0	0	-	0	0	-	0	0	-	0	0	-	0	0	-	1	1	1	1	1	1	0	0	-
I	10774375	A-G	+	intron	R13H8.1	1	0	0	1	1	1	2	0	0	2	0	0	0	0	-	1	0	0	0	0	-	3	0	0	2	1	0.5	2	1	0.5
I	10774383	A-G	+	intron	R13H8.1	1	1	1	1	1	1	2	0	0	2	2	1	0	0	-	1	0	0	0	0	-	3	2	0.666667	2	2	1	2	2	1
I	10774395	A-G	+	intron	R13H8.1	1	1	1	1	0	0	1	1	1	1	0	0	0	0	-	1	1	1	0	0	-	3	1	0.333333	2	1	0.5	2	0	0
I	10774396	A-G	+	intron	R13H8.1	1	1	1	1	0	0	1	1	1	1	0	0	0	0	-	1	1	1	0	0	-	1	0	0	2	1	0.5	2	0	0
I	10774400	A-G	+	intron	R13H8.1	0	0	-	1	1	1	1	1	1	1	0	0	0	0	-	1	1	1	0	0	-	1	1	1	2	1	0.5	2	2	1
I	10774407	A-G	+	intron	R13H8.1	1	1	1	1	1	1	2	2	1	2	2	1	0	0	-	1	1	1	0	0	-	1	1	1	2	2	1	2	2	1
I	10774413	A-G	+	intron	R13H8.1	1	0	0	1	1	1	2	1	0.5	2	0	0	0	0	-	1	0	0	0	0	-	1	1	1	2	0	0	2	2	1
I	10774422	A-G	+	intron	R13H8.1	1	1	1	1	0	0	2	1	0.5	2	1	0.5	0	0	-	1	0	0	0	0	-	3	0	0	2	0	0	2	1	0.5
I	10774429	A-G	+	intron	R13H8.1	1	1	1	1	1	1	2	2	1	2	2	1	0	0	-	1	1	1	0	0	-	3	2	0.666667	2	2	1	2	1	0.5
I	10774430	A-G	+	intron	R13H8.1	1	1	1	1	1	1	2	2	1	2	2	1	0	0	-	1	1	1	0	0	-	3	1	0.333333	2	2	1	2	0	0
I	10774431	A-G	+	intron	R13H8.1	1	0	0	1	1	1	2	0	0	2	2	1	0	0	-	1	1	1	0	0	-	3	0	0	2	1	0.5	2	1	0.5
I	10774613	A-G	+	intron	R13H8.1	0	0	-	1	1	1	1	1	1	0	0	-	0	0	-	0	0	-	0	0	-	0	0	-	0	0	-	0	0	-
I	10774626	A-G	+	intron	R13H8.1	0	0	-	1	1	1	1	1	1	0	0	-	0	0	-	0	0	-	0	0	-	1	0	0	0	0	-	0	0	-
I	10774627	A-G	+	intron	R13H8.1	0	0	-	1	1	1	1	1	1	0	0	-	0	0	-	0	0	-	0	0	-	1	0	0	0	0	-	0	0	-
I	10774639	A-G	+	intron	R13H8.1	0	0	-	2	2	1	1	0	0	0	0	-	0	0	-	0	0	-	0	0	-	1	0	0	0	0	-	0	0	-
I	10774649	A-G	+	intron	R13H8.1	0	0	-	2	2	1	1	1	1	0	0	-	0	0	-	0	0	-	0	0	-	1	0	0	0	0	-	0	0	-
I	10774652	A-G	+	intron	R13H8.1	0	0	-	2	2	1	1	0	0	0	0	-	0	0	-	0	0	-	0	0	-	1	0	0	0	0	-	0	0	-
I	10774672	A-G	+	intron	R13H8.1	0	0	-	3	3	1	1	0	0	0	0	-	0	0	-	0	0	-	0	0	-	1	0	0	0	0	-	0	0	-
I	10774681	A-G	+	intron	R13H8.1	0	0	-	3	2	0.666667	1	0	0	0	0	-	0	0	-	0	0	-	0	0	-	1	0	0	0	0	-	0	0	-
I	10774682	A-G	+	intron	R13H8.1	0	0	-	3	2	0.666667	1	1	1	0	0	-	0	0	-	0	0	-	0	0	-	1	0	0	0	0	-	0	0	-
I	10778667	A-G	-	antisense	R13H8.1	0	0	-	0	0	-	0	0	-	0	0	-	0	0	-	0	0	-	0	0	-	0	0	-	0	0	-	0	0	-
I	10778668	A-G	-	antisense	R13H8.1	0	0	-	0	0	-	0	0	-	0	0	-	0	0	-	0	0	-	0	0	-	0	0	-	0	0	-	0	0	-
I	10778675	A-G	-	antisense	R13H8.1	0	0	-	0	0	-	0	0	-	0	0	-	0	0	-	0	0	-	0	0	-	0	0	-	0	0	-	0	0	-
I	10778678	A-G	-	antisense	R13H8.1	0	0	-	0	0	-	0	0	-	0	0	-	0	0	-	0	0	-	0	0	-	0	0	-	0	0	-	0	0	-
I	10778679	A-G	-	antisense	R13H8.1	0	0	-	0	0	-	0	0	-	0	0	-	0	0	-	0	0	-	0	0	-	0	0	-	0	0	-	0	0	-
I	10778687	A-G	-	antisense	R13H8.1	0	0	-	0	0	-	0	0	-	0	0	-	0	0	-	0	0	-	0	0	-	0	0	-	0	0	-	0	0	-
I	10778688	A-G	-	antisense	R13H8.1	0	0	-	0	0	-	0	0	-	0	0	-	0	0	-	0	0	-	0	0	-	0	0	-	0	0	-	0	0	-
I	10778689	A-G	-	antisense	R13H8.1	0	0	-	0	0	-	0	0	-	0	0	-	0	0	-	0	0	-	0	0	-	0	0	-	0	0	-	0	0	-
I	10778706	A-G	-	integenic	-	0	0	-	0	0	-	0	0	-	0	0	-	0	0	-	0	0	-	0	0	-	0	0	-	0	0	-	0	0	-
I	10778913	A-G	-	integenic	-	0	0	-	0	0	-	0	0	-	0	0	-	0	0	-	0	0	-	0	0	-	2	0	0	0	0	-	0	0	-
I	10778934	A-G	-	integenic	-	0	0	-	0	0	-	0	0	-	0	0	-	0	0	-	0	0	-	0	0	-	2	0	0	0	0	-	0	0	-
I	10778947	A-G	-	integenic	-	0	0	-	0	0	-	0	0	-	0	0	-	0	0	-	0	0	-	0	0	-	2	0	0	0	0	-	0	0	-
I	10778948	A-G	-	integenic	-	0	0	-	0	0	-	0	0	-	0	0	-	0	0	-	0	0	-	0	0	-	2	0	0	0	0	-	0	0	-
I	10778990	A-G	-	integenic	-	0	0	-	0	0	-	0	0	-	0	0	-	0	0	-	1	0	0	0	0	-	1	0	0	0	0	-	0	0	-
I	10779336	A-G	-	downstream	null	0	0	-	0	0	-	0	0	-	0	0	-	0	0	-	0	0	-	0	0	-	0	0	-	0	0	-	0	0	-
I	10779373	A-G	-	downstream	null	0	0	-	0	0	-	0	0	-	0	0	-	0	0	-	0	0	-	0	0	-	0	0	-	0	0	-	0	0	-
I	10779389	A-G	-	downstream	null	0	0	-	0	0	-	0	0	-	0	0	-	0	0	-	0	0	-	0	0	-	0	0	-	0	0	-	0	0	-
I	10779390	A-G	-	downstream	null	0	0	-	0	0	-	0	0	-	0	0	-	0	0	-	0	0	-	0	0	-	0	0	-	0	0	-	0	0	-
I	10779391	A-G	-	downstream	null	0	0	-	0	0	-	0	0	-	0	0	-	0	0	-	0	0	-	0	0	-	0	0	-	0	0	-	0	0	-
I	10779409	A-G	-	downstream	null	0	0	-	0	0	-	0	0	-	0	0	-	0	0	-	0	0	-	0	0	-	0	0	-	0	0	-	0	0	-
I	10779415	A-G	-	downstream	null	0	0	-	0	0	-	0	0	-	0	0	-	0	0	-	0	0	-	0	0	-	0	0	-	0	0	-	0	0	-
I	10779416	A-G	-	downstream	null	0	0	-	0	0	-	0	0	-	0	0	-	0	0	-	0	0	-	0	0	-	0	0	-	0	0	-	0	0	-
I	10779420	A-G	-	downstream	null	0	0	-	0	0	-	0	0	-	0	0	-	0	0	-	0	0	-	0	0	-	0	0	-	0	0	-	0	0	-
I	10779421	A-G	-	downstream	null	0	0	-	0	0	-	0	0	-	0	0	-	0	0	-	0	0	-	0	0	-	0	0	-	0	0	-	0	0	-
I	10779422	A-G	-	downstream	null	0	0	-	0	0	-	0	0	-	0	0	-	0	0	-	0	0	-	0	0	-	0	0	-	0	0	-	0	0	-
I	10779443	A-G	-	downstream	null	0	0	-	0	0	-	0	0	-	0	0	-	0	0	-	0	0	-	0	0	-	0	0	-	0	0	-	0	0	-
I	10779450	A-G	-	downstream	null	0	0	-	0	0	-	0	0	-	0	0	-	0	0	-	0	0	-	0	0	-	0	0	-	0	0	-	0	0	-
I	10779898	A-G	-	downstream	null	0	0	-	0	0	-	0	0	-	0	0	-	0	0	-	0	0	-	0	0	-	1	0	0	0	0	-	0	0	-
I	10779903	A-G	-	downstream	null	0	0	-	0	0	-	0	0	-	0	0	-	0	0	-	0	0	-	0	0	-	1	0	0	0	0	-	0	0	-
I	10779922	A-G	-	downstream	null	0	0	-	0	0	-	0	0	-	0	0	-	0	0	-	0	0	-	0	0	-	1	0	0	0	0	-	0	0	-
I	10779923	A-G	-	downstream	null	0	0	-	0	0	-	0	0	-	0	0	-	0	0	-	0	0	-	0	0	-	1	0	0	0	0	-	0	0	-
I	10779954	A-G	-	downstream	null	0	0	-	0	0	-	0	0	-	0	0	-	0	0	-	0	0	-	0	0	-	0	0	-	0	0	-	0	0	-
I	10780072	A-G	-	downstream	null	1	0	0	0	0	-	0	0	-	0	0	-	0	0	-	0	0	-	0	0	-	0	0	-	0	0	-	0	0	-
I	10780079	A-G	-	downstream	null	1	0	0	0	0	-	0	0	-	0	0	-	0	0	-	0	0	-	0	0	-	0	0	-	0	0	-	0	0	-
I	10780124	A-G	-	downstream	null	3	0	0	0	0	-	0	0	-	0	0	-	0	0	-	0	0	-	0	0	-	0	0	-	0	0	-	0	0	-
I	10780134	A-G	-	downstream	null	3	0	0	0	0	-	0	0	-	0	0	-	0	0	-	0	0	-	0	0	-	0	0	-	0	0	-	0	0	-
I	10781145	A-G	-	downstream	null	6	0	0	1	0	0	0	0	-	0	0	-	0	0	-	2	0	0	4	0	0	0	0	-	0	0	-	0	0	-
I	10781301	A-G	-	noncoding	null	12	0	0	0	0	-	0	0	-	0	0	-	0	0	-	4	0	0	8	0	0	0	0	-	0	0	-	1	0	0
I	10781333	A-G	-	noncoding	null	13	0	0	0	0	-	0	0	-	0	0	-	0	0	-	3	0	0	7	0	0	0	0	-	0	0	-	1	0	0
I	10781370	A-G	-	noncoding	null	13	0	0	0	0	-	0	0	-	0	0	-	0	0	-	3	0	0	7	0	0	0	0	-	0	0	-	1	0	0
I	10781384	A-G	-	noncoding	null	13	0	0	1	0	0	0	0	-	0	0	-	0	0	-	3	0	0	8	0	0	0	0	-	0	0	-	1	0	0
I	10781417	A-G	-	upstream	null	10	0	0	1	0	0	0	0	-	0	0	-	0	0	-	3	0	0	8	0	0	1	0	0	0	0	-	1	0	0
I	10781427	A-G	-	upstream	null	9	0	0	1	0	0	0	0	-	0	0	-	0	0	-	3	0	0	8	0	0	1	0	0	0	0	-	1	0	0
I	10781624	A-G	-	downstream/upstream	F55A3.5	8	0	0	2	0	0	0	0	-	0	0	-	0	0	-	0	0	-	6	0	0	1	0	0	0	0	-	0	0	-
I	10781625	A-G	-	downstream/upstream	F55A3.5	8	0	0	2	0	0	0	0	-	0	0	-	0	0	-	0	0	-	6	0	0	1	0	0	0	0	-	0	0	-
I	10781626	A-G	-	downstream/upstream	F55A3.5	8	0	0	2	0	0	0	0	-	0	0	-	0	0	-	0	0	-	6	0	0	1	0	0	0	0	-	0	0	-
I	10781661	A-G	-	downstream/upstream	F55A3.5	8	0	0	2	0	0	0	0	-	0	0	-	0	0	-	0	0	-	6	0	0	1	0	0	0	0	-	0	0	-
I	10781666	A-G	-	downstream/upstream	F55A3.5	8	0	0	2	0	0	0	0	-	0	0	-	0	0	-	0	0	-	6	0	0	1	0	0	0	0	-	0	0	-
I	10781667	A-G	-	downstream/upstream	F55A3.5	8	0	0	2	0	0	0	0	-	0	0	-	0	0	-	0	0	-	6	0	0	1	0	0	0	0	-	0	0	-
I	10781668	A-G	-	downstream/upstream	F55A3.5	8	0	0	2	0	0	0	0	-	0	0	-	0	0	-	0	0	-	6	0	0	1	0	0	0	0	-	0	0	-
I	10781741	A-G	-	downstream/upstream	F55A3.5	1	0	0	1	0	0	0	0	-	0	0	-	0	0	-	0	0	-	2	0	0	0	0	-	0	0	-	0	0	-
I	10781742	A-G	-	downstream/upstream	F55A3.5	1	0	0	1	0	0	0	0	-	0	0	-	0	0	-	0	0	-	2	0	0	0	0	-	0	0	-	0	0	-
I	10781753	A-G	-	downstream/upstream	F55A3.5	1	0	0	1	0	0	0	0	-	0	0	-	0	0	-	0	0	-	2	0	0	0	0	-	0	0	-	0	0	-
I	10781758	A-G	-	downstream/upstream	F55A3.5	1	0	0	1	0	0	0	0	-	0	0	-	0	0	-	0	0	-	2	0	0	0	0	-	0	0	-	0	0	-
I	10781760	A-G	-	downstream/upstream	F55A3.5	1	0	0	1	0	0	0	0	-	0	0	-	0	0	-	0	0	-	2	0	0	0	0	-	0	0	-	0	0	-
I	10781809	A-G	-	downstream	F55A3.5	1	0	0	1	0	0	0	0	-	0	0	-	0	0	-	1	0	0	2	0	0	0	0	-	0	0	-	0	0	-
I	10781817	A-G	-	downstream	F55A3.5	1	0	0	1	0	0	0	0	-	0	0	-	0	0	-	1	0	0	2	0	0	0	0	-	0	0	-	0	0	-
I	10781820	A-G	-	downstream	F55A3.5	1	0	0	1	0	0	0	0	-	0	0	-	0	0	-	1	0	0	2	0	0	0	0	-	0	0	-	0	0	-
I	10781823	A-G	-	downstream	F55A3.5	1	0	0	1	0	0	0	0	-	0	0	-	0	0	-	1	0	0	2	0	0	0	0	-	0	0	-	0	0	-
I	10781824	A-G	-	downstream	F55A3.5	1	0	0	1	0	0	0	0	-	0	0	-	0	0	-	1	0	0	2	0	0	0	0	-	0	0	-	0	0	-
I	10781830	A-G	-	downstream	F55A3.5	1	0	0	1	0	0	0	0	-	0	0	-	0	0	-	1	0	0	2	0	0	0	0	-	0	0	-	0	0	-
I	10781831	A-G	-	downstream	F55A3.5	1	0	0	1	0	0	0	0	-	0	0	-	0	0	-	1	0	0	2	0	0	0	0	-	0	0	-	0	0	-
I	10781917	A-G	-	downstream	F55A3.5	3	0	0	1	0	0	0	0	-	0	0	-	0	0	-	0	0	-	2	0	0	0	0	-	0	0	-	0	0	-
I	10781920	A-G	-	downstream	F55A3.5	3	0	0	1	0	0	0	0	-	0	0	-	0	0	-	1	0	0	3	0	0	0	0	-	0	0	-	0	0	-
I	10806031	A-G	+	intron	F55A3.1	1	0	0	1	1	1	0	0	-	0	0	-	1	1	1	0	0	-	0	0	-	1	1	1	0	0	-	0	0	-
I	10813	A-G	-	upstream	Y74C9A.3	0	0	-	0	0	-	0	0	-	0	0	-	0	0	-	0	0	-	0	0	-	0	0	-	1	0	0	0	0	-
I	10819145	A-G	+	downstream	C35E7.6	387	167	0.431525	173	79	0.456647	174	56	0.321839	51	19	0.372549	57	16	0.280702	41	26	0.634146	208	53	0.254808	248	103	0.415323	83	23	0.277108	13	3	0.230769
I	10819147	A-G	+	downstream	C35E7.6	390	174	0.446154	173	91	0.526012	176	65	0.369318	51	24	0.470588	57	18	0.315789	41	22	0.536585	209	21	0.100478	248	59	0.237903	84	6	0.0714286	13	1	0.0769231
I	10819169	A-G	+	downstream	C35E7.6	228	144	0.631579	83	56	0.674699	85	52	0.611765	27	20	0.740741	21	13	0.619048	16	12	0.75	100	6	0.06	116	13	0.112069	40	2	0.05	2	0	0
I	10819171	A-G	+	downstream	C35E7.6	227	21	0.092511	83	7	0.0843373	87	7	0.0804598	26	1	0.0384615	20	3	0.15	16	2	0.125	100	1	0.01	117	4	0.034188	40	1	0.025	2	0	0
I	10819178	A-G	+	downstream	C35E7.6	215	19	0.0883721	78	10	0.128205	84	13	0.154762	22	0	0	19	1	0.0526316	13	2	0.153846	97	2	0.0206186	110	7	0.0636364	38	2	0.0526316	2	0	0
I	10819179	A-G	+	downstream	C35E7.6	212	7	0.0330189	78	4	0.0512821	84	1	0.0119048	22	0	0	19	0	0	14	0	0	95	1	0.0105263	111	2	0.018018	39	0	0	2	0	0
I	10819183	A-G	+	downstream	C35E7.6	209	159	0.760766	78	68	0.871795	83	64	0.771084	23	18	0.782609	20	16	0.8	12	9	0.75	90	17	0.188889	105	34	0.32381	39	8	0.205128	2	2	1
I	10819184	A-G	+	downstream	C35E7.6	207	38	0.183575	78	21	0.269231	81	10	0.123457	24	3	0.125	20	3	0.15	12	5	0.416667	92	8	0.0869565	104	22	0.211538	40	3	0.075	2	0	0
I	10819185	A-G	+	downstream	C35E7.6	212	29	0.136792	79	20	0.253165	84	12	0.142857	24	4	0.166667	20	1	0.05	12	3	0.25	93	3	0.0322581	105	14	0.133333	40	4	0.1	2	0	0
I	10819186	A-G	+	downstream	C35E7.6	213	126	0.591549	80	60	0.75	84	40	0.47619	23	14	0.608696	20	11	0.55	13	11	0.846154	93	10	0.107527	104	30	0.288462	40	6	0.15	2	1	0.5
I	10819187	A-G	+	downstream	C35E7.6	217	53	0.24424	80	28	0.35	87	25	0.287356	25	6	0.24	21	3	0.142857	16	6	0.375	97	4	0.0412371	103	9	0.0873786	42	4	0.0952381	3	2	0.666667
I	10819188	A-G	+	downstream	C35E7.6	218	57	0.261468	82	33	0.402439	87	27	0.310345	25	6	0.24	21	6	0.285714	15	9	0.6	99	16	0.161616	104	21	0.201923	42	4	0.0952381	3	1	0.333333
I	10819193	A-G	+	downstream	C35E7.6	218	21	0.0963303	82	9	0.109756	85	16	0.188235	24	3	0.125	21	2	0.0952381	16	2	0.125	100	0	0	105	4	0.0380952	42	2	0.047619	3	0	0
I	10819196	A-G	+	downstream	C35E7.6	218	51	0.233945	82	28	0.341463	87	17	0.195402	25	11	0.44	21	8	0.380952	16	8	0.5	99	16	0.161616	108	38	0.351852	42	16	0.380952	3	1	0.333333
I	10819197	A-G	+	downstream	C35E7.6	218	4	0.0183486	81	4	0.0493827	87	2	0.0229885	24	0	0	20	0	0	15	0	0	98	1	0.0102041	114	5	0.0438596	42	3	0.0714286	3	0	0
I	10819198	A-G	+	downstream	C35E7.6	219	34	0.155251	81	22	0.271605	87	12	0.137931	24	5	0.208333	20	3	0.15	16	3	0.1875	99	19	0.191919	113	22	0.19469	42	8	0.190476	3	1	0.333333
I	10819199	A-G	+	downstream	C35E7.6	218	7	0.0321101	81	5	0.0617284	86	4	0.0465116	25	1	0.04	20	1	0.05	15	0	0	98	2	0.0204082	112	11	0.0982143	42	5	0.119048	3	1	0.333333
I	10819209	A-G	+	downstream	C35E7.6	208	1	0.00480769	80	4	0.05	82	3	0.0365854	23	1	0.0434783	19	0	0	15	0	0	85	1	0.0117647	103	5	0.0485437	37	3	0.0810811	3	0	0
I	10819211	A-G	+	downstream	C35E7.6	207	41	0.198068	80	32	0.4	87	20	0.229885	22	7	0.318182	19	6	0.315789	15	9	0.6	84	7	0.0833333	99	22	0.222222	38	5	0.131579	3	2	0.666667
I	10819221	A-G	+	downstream	C35E7.6	195	38	0.194872	77	15	0.194805	81	14	0.17284	24	3	0.125	18	1	0.0555556	15	5	0.333333	80	10	0.125	87	20	0.229885	36	5	0.138889	3	1	0.333333
I	10819224	A-G	+	downstream	C35E7.6	185	55	0.297297	73	25	0.342466	80	19	0.2375	23	7	0.304348	17	5	0.294118	15	5	0.333333	81	5	0.0617284	81	15	0.185185	34	4	0.117647	3	1	0.333333
I	10819229	A-G	+	downstream	C35E7.6	195	47	0.241026	80	35	0.4375	83	18	0.216867	23	6	0.26087	16	5	0.3125	15	8	0.533333	91	6	0.0659341	65	11	0.169231	38	2	0.0526316	3	2	0.666667
I	10819230	A-G	+	downstream	C35E7.6	202	56	0.277228	82	29	0.353659	86	24	0.27907	24	8	0.333333	18	2	0.111111	15	4	0.266667	94	6	0.0638298	64	11	0.171875	41	4	0.097561	3	2	0.666667
I	10819232	A-G	+	downstream	C35E7.6	215	11	0.0511628	81	6	0.0740741	83	2	0.0240964	25	1	0.04	20	2	0.1	16	3	0.1875	99	2	0.020202	58	0	0	43	0	0	3	0	0
I	10819233	A-G	+	downstream	C35E7.6	212	6	0.0283019	79	5	0.0632911	81	3	0.037037	24	1	0.0416667	19	0	0	16	2	0.125	99	1	0.010101	56	0	0	42	2	0.047619	3	0	0
I	10819238	A-G	+	downstream	C35E7.6	211	209	0.990521	82	82	1	84	84	1	25	24	0.96	20	20	1	17	17	1	100	93	0.93	75	70	0.933333	43	39	0.906977	3	3	1
I	10819254	A-G	+	downstream	C35E7.6	220	6	0.0272727	86	4	0.0465116	87	3	0.0344828	23	0	0	19	0	0	18	3	0.166667	102	7	0.0686275	124	7	0.0564516	45	4	0.0888889	3	0	0
I	10819257	A-G	+	downstream	C35E7.6	226	15	0.0663717	88	8	0.0909091	88	6	0.0681818	24	2	0.0833333	20	1	0.05	19	1	0.0526316	102	1	0.00980392	128	3	0.0234375	45	1	0.0222222	3	0	0
I	10819262	A-G	+	downstream	C35E7.6	224	53	0.236607	88	23	0.261364	88	18	0.204545	26	5	0.192308	21	7	0.333333	19	8	0.421053	100	17	0.17	128	37	0.289062	44	8	0.181818	3	0	0
I	10819268	A-G	+	downstream	C35E7.6	227	155	0.682819	89	58	0.651685	89	55	0.617978	23	18	0.782609	21	15	0.714286	19	14	0.736842	102	33	0.323529	128	61	0.476562	44	14	0.318182	4	3	0.75
I	10819269	A-G	+	downstream	C35E7.6	225	164	0.728889	91	70	0.769231	89	67	0.752809	26	17	0.653846	21	18	0.857143	19	13	0.684211	101	38	0.376238	127	75	0.590551	44	21	0.477273	4	1	0.25
I	10819270	A-G	+	downstream	C35E7.6	226	60	0.265487	90	30	0.333333	88	27	0.306818	26	4	0.153846	21	3	0.142857	19	5	0.263158	102	10	0.0980392	128	15	0.117188	44	5	0.113636	4	1	0.25
I	10819274	A-G	+	downstream	C35E7.6	226	71	0.314159	89	38	0.426966	89	29	0.325843	26	12	0.461538	21	4	0.190476	19	9	0.473684	103	23	0.223301	129	48	0.372093	43	13	0.302326	4	2	0.5
I	10819276	A-G	+	downstream	C35E7.6	227	169	0.744493	90	66	0.733333	89	67	0.752809	26	14	0.538462	21	14	0.666667	19	16	0.842105	103	50	0.485437	129	75	0.581395	43	25	0.581395	4	1	0.25
I	10819282	A-G	+	downstream	C35E7.6	225	43	0.191111	85	31	0.364706	85	22	0.258824	25	3	0.12	18	3	0.166667	19	6	0.315789	99	5	0.0505051	121	6	0.0495868	41	0	0	4	0	0
I	10819287	A-G	+	downstream	C35E7.6	197	61	0.309645	77	33	0.428571	69	18	0.26087	19	6	0.315789	16	5	0.3125	13	2	0.153846	88	26	0.295455	103	46	0.446602	35	11	0.314286	4	4	1
I	10819288	A-G	+	downstream	C35E7.6	190	72	0.378947	74	35	0.472973	66	18	0.272727	20	6	0.3	16	4	0.25	13	3	0.230769	86	32	0.372093	104	46	0.442308	35	12	0.342857	4	2	0.5
I	10819289	A-G	+	downstream	C35E7.6	191	45	0.235602	72	26	0.361111	67	13	0.19403	20	5	0.25	16	3	0.1875	13	0	0	84	33	0.392857	103	45	0.436893	35	7	0.2	4	1	0.25
I	10819291	A-G	+	downstream	C35E7.6	189	39	0.206349	72	11	0.152778	66	9	0.136364	20	5	0.25	16	3	0.1875	13	8	0.615385	83	9	0.108434	104	15	0.144231	35	6	0.171429	4	1	0.25
I	10819296	A-G	+	downstream	C35E7.6	191	94	0.492147	73	39	0.534247	68	26	0.382353	20	6	0.3	15	8	0.533333	13	10	0.769231	86	9	0.104651	105	33	0.314286	35	7	0.2	4	1	0.25
I	10819297	A-G	+	downstream	C35E7.6	191	53	0.277487	73	22	0.30137	68	14	0.205882	20	5	0.25	16	5	0.3125	13	6	0.461538	86	9	0.104651	104	33	0.317308	35	8	0.228571	4	1	0.25
I	10819298	A-G	+	downstream	C35E7.6	191	83	0.434555	73	36	0.493151	68	27	0.397059	20	9	0.45	16	6	0.375	13	10	0.769231	86	21	0.244186	104	38	0.365385	35	11	0.314286	4	1	0.25
I	10819299	A-G	+	downstream	C35E7.6	191	43	0.225131	73	22	0.30137	68	16	0.235294	20	7	0.35	16	2	0.125	13	6	0.461538	86	8	0.0930233	105	24	0.228571	35	4	0.114286	4	1	0.25
I	10819300	A-G	+	downstream	C35E7.6	191	5	0.026178	73	3	0.0410959	68	1	0.0147059	20	0	0	16	1	0.0625	13	0	0	86	0	0	104	7	0.0673077	35	0	0	4	0	0
I	10819303	A-G	+	downstream	C35E7.6	189	186	0.984127	72	71	0.986111	68	67	0.985294	20	20	1	16	16	1	13	13	1	86	86	1	104	102	0.980769	35	33	0.942857	4	4	1
I	10819319	A-G	+	downstream	C35E7.6	184	101	0.548913	71	34	0.478873	65	33	0.507692	19	9	0.473684	15	9	0.6	12	6	0.5	83	29	0.349398	94	46	0.489362	32	4	0.125	4	3	0.75
I	10819321	A-G	+	downstream	C35E7.6	183	53	0.289617	71	32	0.450704	66	17	0.257576	20	7	0.35	15	3	0.2	12	6	0.5	83	35	0.421687	95	53	0.557895	33	26	0.787879	4	3	0.75
I	10819341	A-G	+	downstream	C35E7.6	46	15	0.326087	18	9	0.5	10	2	0.2	3	2	0.666667	1	0	0	3	1	0.333333	16	0	0	14	0	0	4	0	0	2	1	0.5
I	10819342	A-G	+	downstream	C35E7.6	47	19	0.404255	18	6	0.333333	10	3	0.3	4	2	0.5	1	0	0	3	2	0.666667	16	0	0	14	2	0.142857	4	0	0	2	0	0
I	10819343	A-G	+	downstream	C35E7.6	47	12	0.255319	18	5	0.277778	9	5	0.555556	4	0	0	1	0	0	3	3	1	16	1	0.0625	13	4	0.307692	4	1	0.25	2	0	0
I	10819344	A-G	+	downstream	C35E7.6	47	9	0.191489	18	3	0.166667	9	1	0.111111	4	1	0.25	1	0	0	3	1	0.333333	16	1	0.0625	12	1	0.0833333	4	0	0	2	0	0
I	10819350	A-G	+	downstream	C35E7.6	47	6	0.12766	17	1	0.0588235	9	1	0.111111	4	0	0	1	0	0	3	1	0.333333	16	0	0	13	0	0	4	1	0.25	2	0	0
I	10819354	A-G	+	downstream	C35E7.6	47	13	0.276596	18	2	0.111111	10	2	0.2	4	1	0.25	1	0	0	3	2	0.666667	15	1	0.0666667	15	3	0.2	4	1	0.25	2	0	0
I	10819355	A-G	+	downstream	C35E7.6	46	6	0.130435	18	2	0.111111	10	2	0.2	4	1	0.25	1	0	0	3	1	0.333333	15	1	0.0666667	15	2	0.133333	4	1	0.25	2	0	0
I	10819356	A-G	+	downstream	C35E7.6	47	4	0.0851064	18	2	0.111111	10	1	0.1	4	0	0	1	0	0	3	0	0	15	0	0	16	1	0.0625	4	1	0.25	2	1	0.5
I	10819357	A-G	+	downstream	C35E7.6	47	3	0.0638298	18	0	0	10	1	0.1	4	0	0	1	0	0	3	0	0	15	3	0.2	15	2	0.133333	4	1	0.25	2	0	0
I	10819374	A-G	+	downstream	C35E7.6	56	18	0.321429	18	5	0.277778	14	3	0.214286	3	1	0.333333	2	0	0	3	1	0.333333	18	0	0	17	5	0.294118	9	4	0.444444	2	1	0.5
I	10819380	A-G	+	downstream	C35E7.6	59	35	0.59322	18	10	0.555556	14	6	0.428571	3	2	0.666667	2	0	0	4	3	0.75	18	12	0.666667	16	11	0.6875	9	6	0.666667	3	3	1
I	10819381	A-G	+	downstream	C35E7.6	62	61	0.983871	22	22	1	17	15	0.882353	3	3	1	2	2	1	5	5	1	19	19	1	17	16	0.941176	9	8	0.888889	3	3	1
I	10819382	A-G	+	downstream	C35E7.6	61	11	0.180328	22	7	0.318182	17	2	0.117647	3	1	0.333333	2	0	0	5	1	0.2	19	0	0	17	0	0	9	0	0	3	0	0
I	10819383	A-G	+	downstream	C35E7.6	62	10	0.16129	22	4	0.181818	17	2	0.117647	3	0	0	2	0	0	5	1	0.2	19	2	0.105263	17	1	0.0588235	9	0	0	4	1	0.25
I	10819384	A-G	+	downstream	C35E7.6	62	6	0.0967742	22	3	0.136364	17	0	0	3	0	0	2	0	0	5	1	0.2	19	2	0.105263	17	1	0.0588235	9	0	0	4	0	0
I	10819388	A-G	+	downstream	C35E7.6	63	9	0.142857	21	4	0.190476	17	5	0.294118	3	1	0.333333	2	0	0	5	2	0.4	19	4	0.210526	16	4	0.25	9	1	0.111111	3	1	0.333333
I	10819389	A-G	+	downstream	C35E7.6	63	29	0.460317	21	12	0.571429	17	10	0.588235	3	1	0.333333	2	1	0.5	5	2	0.4	19	8	0.421053	16	11	0.6875	9	5	0.555556	4	3	0.75
I	10819396	A-G	+	downstream	C35E7.6	64	4	0.0625	21	1	0.047619	19	2	0.105263	3	0	0	2	0	0	5	0	0	19	1	0.0526316	18	1	0.0555556	9	0	0	4	0	0
I	10819397	A-G	+	downstream	C35E7.6	64	5	0.078125	21	1	0.047619	19	1	0.0526316	3	0	0	2	0	0	5	0	0	19	0	0	19	0	0	9	0	0	4	0	0
I	10819406	A-G	+	downstream	C35E7.6	65	25	0.384615	20	9	0.45	19	7	0.368421	3	2	0.666667	2	1	0.5	5	3	0.6	19	5	0.263158	17	8	0.470588	9	5	0.555556	4	1	0.25
I	10819408	A-G	+	downstream	C35E7.6	66	3	0.0454545	20	1	0.05	19	2	0.105263	3	0	0	2	0	0	5	0	0	20	0	0	17	2	0.117647	10	0	0	4	0	0
I	10819416	A-G	+	downstream	C35E7.6	69	6	0.0869565	20	0	0	20	2	0.1	2	0	0	2	0	0	5	1	0.2	21	0	0	19	0	0	10	0	0	4	0	0
I	10819419	A-G	+	downstream	C35E7.6	70	9	0.128571	21	0	0	20	3	0.15	2	2	1	2	0	0	5	3	0.6	21	0	0	19	2	0.105263	10	0	0	4	0	0
I	10819442	A-G	+	downstream	C35E7.6	62	3	0.0483871	19	0	0	19	3	0.157895	3	1	0.333333	1	0	0	3	0	0	17	1	0.0588235	17	1	0.0588235	9	0	0	4	0	0
I	10819443	A-G	+	downstream	C35E7.6	60	6	0.1	20	2	0.1	19	0	0	3	1	0.333333	1	0	0	3	1	0.333333	18	1	0.0555556	17	2	0.117647	9	2	0.222222	4	0	0
I	10819452	A-G	+	downstream	C35E7.6	53	42	0.792453	16	12	0.75	18	12	0.666667	2	1	0.5	1	0	0	2	1	0.5	17	7	0.411765	13	7	0.538462	8	5	0.625	4	1	0.25
I	10819453	A-G	+	downstream	C35E7.6	53	7	0.132075	16	1	0.0625	18	0	0	2	0	0	1	0	0	2	0	0	17	3	0.176471	13	3	0.230769	9	2	0.222222	4	0	0
I	10819462	A-G	+	downstream	C35E7.6	49	19	0.387755	15	6	0.4	18	4	0.222222	2	0	0	2	0	0	3	1	0.333333	18	0	0	13	0	0	10	0	0	3	2	0.666667
I	10819468	A-G	+	downstream	C35E7.6	55	4	0.0727273	17	0	0	21	0	0	3	1	0.333333	2	0	0	3	0	0	17	0	0	13	0	0	10	0	0	4	1	0.25
I	10819469	A-G	+	downstream	C35E7.6	55	18	0.327273	17	3	0.176471	21	9	0.428571	3	0	0	2	1	0.5	3	2	0.666667	17	4	0.235294	14	3	0.214286	11	2	0.181818	4	2	0.5
I	10819473	A-G	+	downstream	C35E7.6	55	38	0.690909	17	13	0.764706	21	14	0.666667	3	3	1	2	1	0.5	3	2	0.666667	17	5	0.294118	16	5	0.3125	10	4	0.4	4	2	0.5
I	10819474	A-G	+	downstream	C35E7.6	55	7	0.127273	16	4	0.25	21	3	0.142857	3	0	0	2	0	0	3	0	0	17	0	0	16	1	0.0625	10	1	0.1	4	1	0.25
I	10819476	A-G	+	downstream	C35E7.6	55	8	0.145455	17	2	0.117647	21	3	0.142857	3	1	0.333333	1	0	0	3	1	0.333333	17	0	0	15	3	0.2	10	0	0	4	0	0
I	10819477	A-G	+	downstream	C35E7.6	55	8	0.145455	17	0	0	21	1	0.047619	3	0	0	2	0	0	3	1	0.333333	17	1	0.0588235	16	3	0.1875	10	1	0.1	4	1	0.25
I	10819485	A-G	+	downstream	C35E7.6	52	6	0.115385	15	1	0.0666667	21	4	0.190476	3	0	0	2	0	0	3	0	0	18	1	0.0555556	16	0	0	11	0	0	4	0	0
I	10819493	A-G	+	downstream	C35E7.6	51	33	0.647059	16	13	0.8125	20	14	0.7	3	3	1	2	1	0.5	3	1	0.333333	18	10	0.555556	13	8	0.615385	10	8	0.8	4	2	0.5
I	10819495	A-G	+	downstream	C35E7.6	52	3	0.0576923	16	2	0.125	20	3	0.15	3	0	0	1	0	0	3	0	0	18	0	0	13	0	0	10	0	0	4	0	0
I	10819502	A-G	+	downstream	C35E7.6	54	0	0	20	1	0.05	22	2	0.0909091	3	0	0	3	1	0.333333	4	1	0.25	19	1	0.0526316	16	3	0.1875	11	3	0.272727	4	0	0
I	10819507	A-G	+	downstream	C35E7.6	55	25	0.454545	21	12	0.571429	21	11	0.52381	3	2	0.666667	4	2	0.5	4	3	0.75	19	1	0.0526316	15	4	0.266667	12	1	0.0833333	4	0	0
I	10819508	A-G	+	downstream	C35E7.6	55	5	0.0909091	22	1	0.0454545	21	5	0.238095	3	0	0	4	1	0.25	4	0	0	20	0	0	15	0	0	12	1	0.0833333	4	0	0
I	10819511	A-G	+	downstream	C35E7.6	54	21	0.388889	23	3	0.130435	22	3	0.136364	4	1	0.25	4	1	0.25	4	2	0.5	21	3	0.142857	16	0	0	13	2	0.153846	5	2	0.4
I	10819513	A-G	+	downstream	C35E7.6	52	6	0.115385	23	0	0	21	0	0	4	0	0	4	0	0	4	0	0	20	0	0	17	0	0	14	1	0.0714286	5	1	0.2
I	10819514	A-G	+	downstream	C35E7.6	51	3	0.0588235	23	1	0.0434783	21	1	0.047619	3	0	0	4	0	0	4	0	0	21	1	0.047619	20	3	0.15	14	5	0.357143	4	0	0
I	10819519	A-G	+	downstream	C35E7.6	51	2	0.0392157	23	3	0.130435	22	4	0.181818	3	0	0	4	1	0.25	4	0	0	21	0	0	19	0	0	16	2	0.125	6	0	0
I	10819521	A-G	+	downstream	C35E7.6	52	3	0.0576923	22	4	0.181818	21	2	0.0952381	3	0	0	4	0	0	4	1	0.25	21	2	0.0952381	20	0	0	17	1	0.0588235	6	0	0
I	10819522	A-G	+	downstream	C35E7.6	52	15	0.288462	24	7	0.291667	20	6	0.3	3	2	0.666667	4	1	0.25	4	2	0.5	21	4	0.190476	21	8	0.380952	18	7	0.388889	6	2	0.333333
I	10819533	A-G	+	downstream	C35E7.6	61	14	0.229508	31	8	0.258065	25	2	0.08	5	0	0	5	1	0.2	4	0	0	28	5	0.178571	23	6	0.26087	22	6	0.272727	6	0	0
I	10819539	A-G	+	downstream	C35E7.6	70	4	0.0571429	34	2	0.0588235	25	3	0.12	5	1	0.2	6	1	0.166667	4	1	0.25	31	0	0	26	3	0.115385	28	1	0.0357143	6	0	0
I	10819544	A-G	+	downstream	C35E7.6	80	19	0.2375	40	7	0.175	27	2	0.0740741	5	1	0.2	8	0	0	4	0	0	35	5	0.142857	32	0	0	33	0	0	7	0	0
I	10819549	A-G	+	downstream	C35E7.6	86	16	0.186047	42	6	0.142857	29	6	0.206897	5	0	0	8	0	0	4	0	0	39	4	0.102564	32	4	0.125	34	3	0.0882353	8	2	0.25
I	10819554	A-G	+	downstream	C35E7.6	96	28	0.291667	51	12	0.235294	37	8	0.216216	5	1	0.2	10	5	0.5	4	2	0.5	42	2	0.047619	35	3	0.0857143	36	1	0.0277778	8	1	0.125
I	10819557	A-G	+	downstream	C35E7.6	96	3	0.03125	51	1	0.0196078	38	2	0.0526316	5	0	0	9	0	0	3	0	0	43	1	0.0232558	35	1	0.0285714	37	0	0	9	0	0
I	10819565	A-G	+	downstream	C35E7.6	96	2	0.0208333	52	1	0.0192308	37	0	0	6	0	0	10	1	0.1	2	0	0	40	5	0.125	40	3	0.075	36	2	0.0555556	8	2	0.25
I	10819569	A-G	+	downstream	C35E7.6	98	60	0.612245	56	36	0.642857	37	20	0.540541	6	5	0.833333	10	6	0.6	2	2	1	42	13	0.309524	41	8	0.195122	37	4	0.108108	8	4	0.5
I	10819570	A-G	+	downstream	C35E7.6	102	49	0.480392	57	25	0.438596	37	18	0.486486	6	5	0.833333	10	5	0.5	2	1	0.5	43	26	0.604651	41	18	0.439024	38	25	0.657895	8	6	0.75
I	10819573	A-G	+	downstream	C35E7.6	103	17	0.165049	56	13	0.232143	37	6	0.162162	6	0	0	10	1	0.1	2	1	0.5	43	7	0.162791	43	12	0.27907	38	15	0.394737	8	3	0.375
I	10819575	A-G	+	downstream	C35E7.6	103	20	0.194175	57	11	0.192982	37	7	0.189189	6	2	0.333333	10	2	0.2	2	0	0	42	4	0.0952381	43	4	0.0930233	38	6	0.157895	8	2	0.25
I	10819584	A-G	+	downstream	C35E7.6	103	15	0.145631	56	8	0.142857	36	11	0.305556	6	0	0	10	2	0.2	2	1	0.5	42	9	0.214286	43	6	0.139535	39	7	0.179487	9	3	0.333333
I	10819585	A-G	+	downstream	C35E7.6	102	19	0.186275	55	8	0.145455	36	9	0.25	6	1	0.166667	9	0	0	2	1	0.5	42	5	0.119048	43	3	0.0697674	39	5	0.128205	9	3	0.333333
I	10819607	A-G	+	downstream	C35E7.6	112	5	0.0446429	59	2	0.0338983	39	2	0.0512821	8	0	0	10	1	0.1	3	1	0.333333	47	0	0	38	1	0.0263158	40	1	0.025	8	0	0
I	10819608	A-G	+	downstream	C35E7.6	112	3	0.0267857	59	4	0.0677966	39	1	0.025641	8	0	0	10	1	0.1	3	0	0	47	0	0	37	1	0.027027	40	1	0.025	8	2	0.25
I	10819609	A-G	+	downstream	C35E7.6	112	3	0.0267857	59	4	0.0677966	39	1	0.025641	8	0	0	10	3	0.3	3	1	0.333333	46	2	0.0434783	40	0	0	40	1	0.025	8	2	0.25
I	10819622	A-G	+	downstream	C35E7.6	111	52	0.468468	56	30	0.535714	39	21	0.538462	9	5	0.555556	9	2	0.222222	3	3	1	45	6	0.133333	42	10	0.238095	36	6	0.166667	7	2	0.285714
I	10819625	A-G	+	downstream	C35E7.6	101	17	0.168317	48	8	0.166667	35	6	0.171429	9	0	0	9	3	0.333333	4	2	0.5	39	2	0.0512821	39	1	0.025641	34	1	0.0294118	8	0	0
I	10819631	A-G	+	downstream	C35E7.6	100	53	0.53	44	23	0.522727	33	16	0.484848	8	4	0.5	9	6	0.666667	4	4	1	37	8	0.216216	35	13	0.371429	32	7	0.21875	8	3	0.375
I	10819645	A-G	+	downstream	C35E7.6	105	105	1	50	47	0.94	35	33	0.942857	9	9	1	9	9	1	4	4	1	41	41	1	44	43	0.977273	37	36	0.972973	8	8	1
I	10819656	A-G	+	downstream	C35E7.6	106	91	0.858491	51	44	0.862745	35	24	0.685714	9	7	0.777778	10	5	0.5	4	4	1	41	12	0.292683	44	12	0.272727	39	10	0.25641	8	4	0.5
I	10819669	A-G	+	downstream	C35E7.6	101	1	0.00990099	49	2	0.0408163	33	4	0.121212	8	0	0	9	0	0	3	0	0	41	0	0	41	0	0	39	1	0.025641	8	0	0
I	10819672	A-G	+	downstream	C35E7.6	100	8	0.08	49	3	0.0612245	33	3	0.0909091	8	1	0.125	9	0	0	3	0	0	40	9	0.225	42	4	0.0952381	39	5	0.128205	8	2	0.25
I	10819680	A-G	+	downstream	C35E7.6	104	10	0.0961538	48	2	0.0416667	33	7	0.212121	8	0	0	9	2	0.222222	3	0	0	42	0	0	40	0	0	38	0	0	8	0	0
I	10819682	A-G	+	downstream	C35E7.6	104	85	0.817308	48	36	0.75	33	22	0.666667	8	5	0.625	9	7	0.777778	3	3	1	42	18	0.428571	39	11	0.282051	37	19	0.513514	8	7	0.875
I	10819686	A-G	+	downstream	C35E7.6	104	10	0.0961538	48	2	0.0416667	33	3	0.0909091	8	0	0	9	2	0.222222	3	1	0.333333	41	8	0.195122	44	4	0.0909091	38	3	0.0789474	7	1	0.142857
I	10819687	A-G	+	downstream	C35E7.6	104	39	0.375	48	17	0.354167	33	12	0.363636	8	4	0.5	9	5	0.555556	3	1	0.333333	41	14	0.341463	46	17	0.369565	38	13	0.342105	8	4	0.5
I	10819710	A-G	+	downstream	C35E7.6	95	94	0.989474	43	43	1	27	27	1	6	6	1	7	7	1	3	3	1	32	32	1	37	35	0.945946	35	35	1	7	7	1
I	10819712	A-G	+	downstream	C35E7.6	94	4	0.0425532	43	8	0.186047	27	1	0.037037	6	1	0.166667	7	0	0	2	1	0.5	32	1	0.03125	37	0	0	35	0	0	7	0	0
I	10819713	A-G	+	downstream	C35E7.6	94	9	0.0957447	43	5	0.116279	27	3	0.111111	6	0	0	7	0	0	3	2	0.666667	32	2	0.0625	37	7	0.189189	35	4	0.114286	7	2	0.285714
I	10819717	A-G	+	downstream	C35E7.6	94	20	0.212766	43	9	0.209302	27	5	0.185185	6	2	0.333333	7	2	0.285714	2	0	0	32	10	0.3125	37	9	0.243243	33	9	0.272727	7	2	0.285714
I	10819721	A-G	+	downstream	C35E7.6	98	67	0.683673	42	23	0.547619	27	12	0.444444	6	4	0.666667	7	4	0.571429	3	2	0.666667	33	7	0.212121	36	6	0.166667	34	12	0.352941	7	2	0.285714
I	10819726	A-G	+	downstream	C35E7.6	97	15	0.154639	41	2	0.0487805	26	3	0.115385	6	1	0.166667	7	1	0.142857	3	1	0.333333	32	1	0.03125	31	3	0.0967742	33	0	0	6	1	0.166667
I	10819729	A-G	+	downstream	C35E7.6	98	5	0.0510204	41	1	0.0243902	26	4	0.153846	6	0	0	7	0	0	3	2	0.666667	32	9	0.28125	33	5	0.151515	33	10	0.30303	6	3	0.5
I	10819730	A-G	+	downstream	C35E7.6	98	22	0.22449	41	9	0.219512	26	11	0.423077	6	0	0	7	1	0.142857	2	0	0	32	16	0.5	33	15	0.454545	34	13	0.382353	6	2	0.333333
I	10819737	A-G	+	downstream	C35E7.6	48	5	0.104167	15	5	0.333333	11	1	0.0909091	5	1	0.2	3	0	0	3	1	0.333333	16	3	0.1875	16	2	0.125	14	4	0.285714	2	0	0
I	10819749	A-G	+	downstream	C35E7.6	41	17	0.414634	9	2	0.222222	8	2	0.25	4	0	0	2	0	0	3	2	0.666667	12	5	0.416667	14	7	0.5	7	2	0.285714	1	0	0
I	10819750	A-G	+	downstream	C35E7.6	39	21	0.538462	9	4	0.444444	8	3	0.375	4	2	0.5	2	0	0	3	1	0.333333	11	7	0.636364	14	11	0.785714	7	6	0.857143	1	1	1
I	10819756	A-G	+	downstream	C35E7.6	33	0	0	8	0	0	4	1	0.25	4	0	0	1	0	0	3	1	0.333333	10	0	0	14	1	0.0714286	6	1	0.166667	1	0	0
I	10819758	A-G	+	downstream	C35E7.6	33	13	0.393939	9	4	0.444444	3	2	0.666667	5	5	1	0	0	-	3	1	0.333333	9	1	0.111111	15	3	0.2	7	0	0	0	0	-
I	10819759	A-G	+	downstream	C35E7.6	32	13	0.40625	9	6	0.666667	3	1	0.333333	5	5	1	0	0	-	3	3	1	10	7	0.7	14	7	0.5	7	3	0.428571	0	0	-
I	10819760	A-G	+	downstream	C35E7.6	32	1	0.03125	9	0	0	3	0	0	4	0	0	0	0	-	3	0	0	10	1	0.1	15	0	0	7	1	0.142857	0	0	-
I	10819885	A-G	+	downstream	C35E7.6	223	42	0.188341	127	31	0.244094	64	5	0.078125	13	2	0.153846	26	8	0.307692	23	9	0.391304	81	5	0.0617284	109	16	0.146789	53	3	0.0566038	17	0	0
I	10819886	A-G	+	downstream	C35E7.6	226	94	0.415929	129	65	0.503876	65	17	0.261538	13	3	0.230769	26	9	0.346154	23	20	0.869565	81	33	0.407407	108	42	0.388889	54	18	0.333333	16	3	0.1875
I	10819888	A-G	+	downstream	C35E7.6	230	3	0.0130435	130	6	0.0461538	67	1	0.0149254	13	1	0.0769231	26	0	0	23	3	0.130435	82	0	0	110	2	0.0181818	54	0	0	16	0	0
I	10819900	A-G	+	downstream	C35E7.6	235	53	0.225532	139	36	0.258993	74	14	0.189189	15	2	0.133333	24	5	0.208333	25	10	0.4	80	24	0.3	105	32	0.304762	55	13	0.236364	16	4	0.25
I	10819901	A-G	+	downstream	C35E7.6	239	81	0.338912	142	58	0.408451	75	28	0.373333	15	4	0.266667	24	7	0.291667	26	17	0.653846	80	44	0.55	107	57	0.53271	55	24	0.436364	17	10	0.588235
I	10819904	A-G	+	downstream	C35E7.6	238	6	0.0252101	148	1	0.00675676	78	0	0	15	0	0	24	0	0	26	3	0.115385	78	1	0.0128205	111	8	0.0720721	53	2	0.0377358	17	0	0
I	10819911	A-G	+	downstream	C35E7.6	243	45	0.185185	149	22	0.147651	79	8	0.101266	16	1	0.0625	25	2	0.08	24	7	0.291667	79	21	0.265823	102	42	0.411765	53	12	0.226415	18	3	0.166667
I	10819916	A-G	+	downstream	C35E7.6	241	7	0.0290456	149	2	0.0134228	79	1	0.0126582	16	0	0	24	0	0	25	1	0.04	76	2	0.0263158	95	6	0.0631579	52	2	0.0384615	17	0	0
I	10819926	A-G	+	downstream	C35E7.6	255	3	0.0117647	153	2	0.0130719	80	0	0	17	0	0	24	0	0	23	3	0.130435	86	5	0.0581395	111	19	0.171171	57	5	0.0877193	19	1	0.0526316
I	10819927	A-G	+	downstream	C35E7.6	254	8	0.0314961	153	14	0.0915033	80	5	0.0625	17	0	0	24	2	0.0833333	24	4	0.166667	87	6	0.0689655	111	16	0.144144	58	7	0.12069	19	1	0.0526316
I	10819928	A-G	+	downstream	C35E7.6	254	90	0.354331	152	70	0.460526	81	34	0.419753	16	6	0.375	24	8	0.333333	25	16	0.64	87	17	0.195402	112	39	0.348214	58	18	0.310345	19	4	0.210526
I	10819929	A-G	+	downstream	C35E7.6	252	128	0.507937	151	87	0.576159	80	42	0.525	17	10	0.588235	24	13	0.541667	24	12	0.5	88	12	0.136364	110	17	0.154545	58	14	0.241379	18	1	0.0555556
I	10819930	A-G	+	downstream	C35E7.6	253	136	0.537549	150	89	0.593333	79	50	0.632911	17	6	0.352941	24	16	0.666667	25	16	0.64	88	9	0.102273	108	20	0.185185	58	7	0.12069	18	1	0.0555556
I	10819932	A-G	+	downstream	C35E7.6	255	253	0.992157	150	148	0.986667	81	79	0.975309	17	16	0.941176	24	24	1	24	24	1	86	85	0.988372	108	106	0.981481	58	57	0.982759	18	18	1
I	10819952	A-G	+	downstream	C35E7.6	253	34	0.134387	143	29	0.202797	79	15	0.189873	16	3	0.1875	20	3	0.15	21	5	0.238095	85	5	0.0588235	106	5	0.0471698	57	2	0.0350877	16	0	0
I	10819959	A-G	+	downstream	C35E7.6	248	4	0.016129	148	10	0.0675676	80	1	0.0125	15	0	0	22	0	0	24	3	0.125	83	0	0	115	7	0.0608696	58	1	0.0172414	19	2	0.105263
I	10819960	A-G	+	downstream	C35E7.6	246	44	0.178862	148	40	0.27027	79	18	0.227848	15	1	0.0666667	22	3	0.136364	23	11	0.478261	82	6	0.0731707	112	22	0.196429	58	4	0.0689655	19	1	0.0526316
I	10819961	A-G	+	downstream	C35E7.6	244	13	0.0532787	147	16	0.108844	80	5	0.0625	15	2	0.133333	21	1	0.047619	23	4	0.173913	80	2	0.025	111	7	0.0630631	58	4	0.0689655	18	1	0.0555556
I	10819962	A-G	+	downstream	C35E7.6	246	30	0.121951	145	28	0.193103	80	13	0.1625	15	1	0.0666667	21	0	0	23	8	0.347826	80	3	0.0375	107	12	0.11215	58	7	0.12069	19	0	0
I	10819968	A-G	+	downstream	C35E7.6	242	8	0.0330579	142	7	0.0492958	77	2	0.025974	14	1	0.0714286	20	2	0.1	22	3	0.136364	75	0	0	95	3	0.0315789	57	2	0.0350877	16	1	0.0625
I	10819976	A-G	+	downstream	C35E7.6	232	6	0.0258621	144	5	0.0347222	78	0	0	16	0	0	20	0	0	23	2	0.0869565	79	0	0	78	0	0	53	0	0	19	0	0
I	10819983	A-G	+	downstream	C35E7.6	231	60	0.25974	146	60	0.410959	78	22	0.282051	15	6	0.4	23	6	0.26087	23	12	0.521739	76	29	0.381579	93	39	0.419355	52	23	0.442308	19	7	0.368421
I	10819985	A-G	+	downstream	C35E7.6	229	13	0.0567686	141	6	0.0425532	78	5	0.0641026	15	0	0	24	1	0.0416667	21	2	0.0952381	75	0	0	94	3	0.0319149	49	3	0.0612245	18	1	0.0555556
I	10819987	A-G	+	downstream	C35E7.6	231	118	0.510823	141	74	0.524823	76	42	0.552632	15	7	0.466667	24	12	0.5	21	13	0.619048	75	16	0.213333	93	26	0.27957	48	7	0.145833	18	1	0.0555556
I	10819995	A-G	+	downstream	C35E7.6	250	5	0.02	146	3	0.0205479	79	3	0.0379747	17	0	0	26	0	0	26	1	0.0384615	83	7	0.0843373	106	1	0.00943396	54	1	0.0185185	19	1	0.0526316
I	10819997	A-G	+	downstream	C35E7.6	250	196	0.784	145	106	0.731034	79	60	0.759494	17	14	0.823529	26	20	0.769231	26	23	0.884615	83	30	0.361446	102	49	0.480392	54	24	0.444444	19	8	0.421053
I	10819998	A-G	+	downstream	C35E7.6	250	237	0.948	146	133	0.910959	79	76	0.962025	17	16	0.941176	26	24	0.923077	26	24	0.923077	83	70	0.843373	105	94	0.895238	54	45	0.833333	19	18	0.947368
I	10820001	A-G	+	downstream	C35E7.6	250	102	0.408	145	67	0.462069	80	32	0.4	18	5	0.277778	26	10	0.384615	26	12	0.461538	83	16	0.192771	114	22	0.192982	54	13	0.240741	19	2	0.105263
I	10820002	A-G	+	downstream	C35E7.6	250	24	0.096	147	21	0.142857	80	6	0.075	18	1	0.0555556	26	4	0.153846	26	6	0.230769	83	9	0.108434	118	14	0.118644	54	6	0.111111	19	1	0.0526316
I	10820004	A-G	+	downstream	C35E7.6	249	8	0.0321285	147	13	0.0884354	79	2	0.0253165	18	0	0	26	0	0	26	3	0.115385	83	11	0.13253	126	20	0.15873	53	11	0.207547	19	0	0
I	10820005	A-G	+	downstream	C35E7.6	249	60	0.240964	146	45	0.308219	79	15	0.189873	18	5	0.277778	26	2	0.0769231	26	15	0.576923	83	30	0.361446	124	55	0.443548	53	19	0.358491	19	9	0.473684
I	10820015	A-G	+	downstream	C35E7.6	199	1	0.00502513	127	1	0.00787402	59	2	0.0338983	15	0	0	21	0	0	21	0	0	68	0	0	105	6	0.0571429	42	4	0.0952381	12	0	0
I	10820024	A-G	+	downstream	C35E7.6	169	63	0.372781	106	49	0.462264	48	17	0.354167	15	7	0.466667	19	7	0.368421	15	11	0.733333	56	10	0.178571	85	27	0.317647	31	7	0.225806	7	2	0.285714
I	10820025	A-G	+	downstream	C35E7.6	156	120	0.769231	101	80	0.792079	46	31	0.673913	14	10	0.714286	18	14	0.777778	14	14	1	49	33	0.673469	81	58	0.716049	27	16	0.592593	7	3	0.428571
I	10820026	A-G	+	downstream	C35E7.6	155	32	0.206452	101	21	0.207921	45	8	0.177778	14	0	0	19	2	0.105263	14	2	0.142857	49	22	0.44898	82	40	0.487805	27	12	0.444444	6	2	0.333333
I	10820027	A-G	+	downstream	C35E7.6	156	8	0.0512821	101	2	0.019802	46	1	0.0217391	14	0	0	19	0	0	14	6	0.428571	49	4	0.0816327	82	10	0.121951	27	4	0.148148	6	3	0.5
I	10820032	A-G	+	downstream	C35E7.6	156	40	0.25641	101	39	0.386139	47	13	0.276596	14	5	0.357143	19	6	0.315789	14	6	0.428571	48	8	0.166667	85	13	0.152941	26	3	0.115385	5	0	0
I	10820035	A-G	+	downstream	C35E7.6	153	8	0.0522876	96	3	0.03125	44	0	0	14	1	0.0714286	16	0	0	14	1	0.0714286	48	0	0	84	0	0	25	0	0	6	0	0
I	10820038	A-G	+	downstream	C35E7.6	149	25	0.167785	97	25	0.257732	45	7	0.155556	15	4	0.266667	17	1	0.0588235	14	6	0.428571	49	2	0.0408163	80	5	0.0625	26	0	0	6	0	0
I	10820039	A-G	+	downstream	C35E7.6	150	71	0.473333	97	62	0.639175	46	22	0.478261	15	9	0.6	17	7	0.411765	14	11	0.785714	49	11	0.22449	81	25	0.308642	26	5	0.192308	6	2	0.333333
I	10820040	A-G	+	downstream	C35E7.6	150	60	0.4	97	43	0.443299	46	20	0.434783	15	3	0.2	17	5	0.294118	14	5	0.357143	50	3	0.06	81	13	0.160494	26	1	0.0384615	6	2	0.333333
I	10820041	A-G	+	downstream	C35E7.6	150	9	0.06	97	6	0.0618557	46	4	0.0869565	15	0	0	17	3	0.176471	14	1	0.0714286	50	0	0	83	3	0.0361446	26	0	0	6	1	0.166667
I	10820047	A-G	+	downstream	C35E7.6	154	10	0.0649351	94	10	0.106383	45	3	0.0666667	15	0	0	17	1	0.0588235	13	2	0.153846	51	2	0.0392157	84	8	0.0952381	25	0	0	6	1	0.166667
I	10820050	A-G	+	downstream	C35E7.6	160	2	0.0125	96	1	0.0104167	46	0	0	14	1	0.0714286	19	0	0	15	2	0.133333	53	0	0	88	2	0.0227273	28	0	0	8	0	0
I	10820059	A-G	+	downstream	C35E7.6	162	4	0.0246914	95	2	0.0210526	47	2	0.0425532	14	0	0	19	0	0	15	2	0.133333	54	1	0.0185185	88	0	0	29	0	0	8	0	0
I	10820066	A-G	+	downstream	C35E7.6	162	6	0.037037	95	8	0.0842105	46	3	0.0652174	14	0	0	20	0	0	15	1	0.0666667	54	1	0.0185185	86	9	0.104651	29	2	0.0689655	8	0	0
I	10820067	A-G	+	downstream	C35E7.6	165	9	0.0545455	97	10	0.103093	50	4	0.08	14	1	0.0714286	20	2	0.1	15	3	0.2	57	4	0.0701754	90	11	0.122222	29	4	0.137931	9	0	0
I	10820071	A-G	+	downstream	C35E7.6	146	2	0.0136986	83	1	0.0120482	41	0	0	13	1	0.0769231	17	1	0.0588235	13	2	0.153846	53	0	0	83	2	0.0240964	28	3	0.107143	10	1	0.1
I	10820072	A-G	+	downstream	C35E7.6	126	11	0.0873016	73	9	0.123288	34	3	0.0882353	11	1	0.0909091	12	1	0.0833333	10	2	0.2	43	4	0.0930233	73	7	0.0958904	23	2	0.0869565	9	0	0
I	10820075	A-G	+	downstream	C35E7.6	116	100	0.862069	67	55	0.820896	34	28	0.823529	12	10	0.833333	11	10	0.909091	10	9	0.9	41	28	0.682927	69	50	0.724638	22	16	0.727273	9	6	0.666667
I	10820079	A-G	+	downstream	C35E7.6	104	14	0.134615	55	6	0.109091	26	5	0.192308	12	3	0.25	9	2	0.222222	9	1	0.111111	39	0	0	58	7	0.12069	21	2	0.0952381	9	1	0.111111
I	10820081	A-G	+	downstream	C35E7.6	90	1	0.0111111	49	3	0.0612245	24	1	0.0416667	10	1	0.1	6	1	0.166667	8	4	0.5	38	3	0.0789474	51	5	0.0980392	22	1	0.0454545	8	1	0.125
I	10820082	A-G	+	downstream	C35E7.6	86	21	0.244186	47	15	0.319149	23	7	0.304348	9	4	0.444444	6	1	0.166667	8	8	1	38	12	0.315789	45	19	0.422222	22	10	0.454545	8	2	0.25
I	10820083	A-G	+	downstream	C35E7.6	85	9	0.105882	43	2	0.0465116	23	2	0.0869565	8	0	0	6	2	0.333333	8	2	0.25	38	3	0.0789474	46	6	0.130435	22	2	0.0909091	8	0	0
I	10820087	A-G	+	downstream	C35E7.6	81	5	0.0617284	43	7	0.162791	23	0	0	8	0	0	5	0	0	8	1	0.125	36	2	0.0555556	45	0	0	22	1	0.0454545	8	1	0.125
I	10820089	A-G	+	downstream	C35E7.6	78	11	0.141026	41	8	0.195122	22	4	0.181818	8	1	0.125	5	2	0.4	7	1	0.142857	36	1	0.0277778	44	4	0.0909091	19	1	0.0526316	6	0	0
I	10820093	A-G	+	downstream	C35E7.6	48	9	0.1875	23	2	0.0869565	16	3	0.1875	5	0	0	3	1	0.333333	1	1	1	22	2	0.0909091	27	4	0.148148	12	1	0.0833333	6	0	0
I	10820095	A-G	+	downstream	C35E7.6	42	1	0.0238095	18	2	0.111111	14	0	0	5	2	0.4	3	0	0	1	0	0	22	0	0	23	1	0.0434783	10	1	0.1	5	0	0
I	10820102	A-G	+	downstream	C35E7.6	42	8	0.190476	18	7	0.388889	14	3	0.214286	5	2	0.4	3	0	0	1	0	0	22	1	0.0454545	22	1	0.0454545	10	0	0	6	2	0.333333
I	10820103	A-G	+	downstream	C35E7.6	42	19	0.452381	18	6	0.333333	14	4	0.285714	5	3	0.6	3	2	0.666667	1	1	1	22	4	0.181818	23	3	0.130435	10	0	0	6	0	0
I	10820114	A-G	+	downstream	C35E7.6	41	3	0.0731707	18	2	0.111111	14	1	0.0714286	4	0	0	3	0	0	0	0	-	22	0	0	21	0	0	10	0	0	6	0	0
I	10820117	A-G	+	downstream	C35E7.6	42	6	0.142857	17	5	0.294118	14	3	0.214286	4	2	0.5	3	0	0	1	0	0	21	1	0.047619	21	1	0.047619	10	1	0.1	6	0	0
I	10820121	A-G	+	downstream	C35E7.6	40	2	0.05	17	1	0.0588235	13	0	0	4	0	0	3	0	0	1	0	0	19	0	0	19	0	0	10	0	0	6	1	0.166667
I	10820126	A-G	+	downstream	C35E7.6	41	37	0.902439	15	10	0.666667	13	11	0.846154	4	3	0.75	3	2	0.666667	1	1	1	17	4	0.235294	19	7	0.368421	9	2	0.222222	6	3	0.5
I	10820127	A-G	+	downstream	C35E7.6	40	39	0.975	15	13	0.866667	14	11	0.785714	4	4	1	3	2	0.666667	1	1	1	17	15	0.882353	19	16	0.842105	9	9	1	6	5	0.833333
I	10820132	A-G	+	downstream	C35E7.6	39	16	0.410256	15	6	0.4	14	4	0.285714	5	1	0.2	3	0	0	1	1	1	18	5	0.277778	20	7	0.35	10	2	0.2	6	1	0.166667
I	10820133	A-G	+	downstream	C35E7.6	39	9	0.230769	16	4	0.25	14	4	0.285714	5	0	0	4	0	0	1	1	1	19	8	0.421053	19	4	0.210526	10	0	0	5	2	0.4
I	10820138	A-G	+	downstream	C35E7.6	41	4	0.097561	18	2	0.111111	14	0	0	4	0	0	6	1	0.166667	1	0	0	20	0	0	16	0	0	10	0	0	6	0	0
I	10820140	A-G	+	downstream	C35E7.6	41	4	0.097561	18	2	0.111111	14	2	0.142857	4	0	0	6	1	0.166667	1	1	1	20	0	0	14	2	0.142857	11	0	0	6	0	0
I	10820141	A-G	+	downstream	C35E7.6	42	6	0.142857	18	1	0.0555556	14	0	0	4	0	0	6	0	0	1	1	1	20	3	0.15	15	6	0.4	11	2	0.181818	6	4	0.666667
I	10820158	A-G	+	downstream	C35E7.6	41	4	0.097561	18	2	0.111111	14	4	0.285714	4	2	0.5	6	0	0	0	0	-	17	2	0.117647	16	1	0.0625	10	2	0.2	6	2	0.333333
I	10820164	A-G	+	downstream	C35E7.6	48	15	0.3125	19	2	0.105263	16	2	0.125	4	2	0.5	8	2	0.25	1	0	0	25	6	0.24	18	6	0.333333	12	4	0.333333	6	2	0.333333
I	10820170	A-G	+	downstream	C35E7.6	51	36	0.705882	21	12	0.571429	17	9	0.529412	5	4	0.8	8	6	0.75	2	1	0.5	27	9	0.333333	27	7	0.259259	13	4	0.307692	6	1	0.166667
I	10820171	A-G	+	downstream	C35E7.6	53	20	0.377358	21	8	0.380952	17	5	0.294118	5	3	0.6	8	2	0.25	2	0	0	27	3	0.111111	27	7	0.259259	13	1	0.0769231	6	1	0.166667
I	10820177	A-G	+	downstream	C35E7.6	56	14	0.25	21	6	0.285714	18	4	0.222222	5	1	0.2	8	1	0.125	2	1	0.5	27	6	0.222222	28	10	0.357143	13	3	0.230769	6	2	0.333333
I	10820178	A-G	+	downstream	C35E7.6	56	28	0.5	22	7	0.318182	19	8	0.421053	5	2	0.4	8	3	0.375	2	0	0	27	5	0.185185	27	9	0.333333	13	2	0.153846	6	1	0.166667
I	10820179	A-G	+	downstream	C35E7.6	56	11	0.196429	21	2	0.0952381	20	4	0.2	5	1	0.2	8	0	0	2	0	0	27	5	0.185185	27	3	0.111111	13	1	0.0769231	6	1	0.166667
I	10820180	A-G	+	downstream	C35E7.6	57	15	0.263158	21	10	0.47619	20	5	0.25	5	1	0.2	8	1	0.125	2	2	1	28	9	0.321429	27	6	0.222222	13	0	0	6	0	0
I	10820181	A-G	+	downstream	C35E7.6	56	13	0.232143	22	7	0.318182	20	6	0.3	5	0	0	8	1	0.125	3	2	0.666667	28	3	0.107143	27	4	0.148148	13	0	0	6	0	0
I	10820186	A-G	+	downstream	C35E7.6	57	16	0.280702	23	3	0.130435	21	1	0.047619	5	1	0.2	8	2	0.25	3	0	0	29	6	0.206897	27	6	0.222222	14	5	0.357143	6	1	0.166667
I	10820189	A-G	+	downstream	C35E7.6	60	3	0.05	28	5	0.178571	24	2	0.0833333	5	0	0	9	1	0.111111	3	0	0	33	3	0.0909091	27	5	0.185185	14	1	0.0714286	6	0	0
I	10820190	A-G	+	downstream	C35E7.6	60	1	0.0166667	28	2	0.0714286	25	1	0.04	4	0	0	9	0	0	3	0	0	34	3	0.0882353	27	0	0	14	0	0	6	0	0
I	10820191	A-G	+	downstream	C35E7.6	60	8	0.133333	29	3	0.103448	25	3	0.12	4	0	0	9	0	0	3	1	0.333333	35	1	0.0285714	27	3	0.111111	14	0	0	6	1	0.166667
I	10820197	A-G	+	downstream	C35E7.6	63	41	0.650794	31	18	0.580645	26	14	0.538462	4	4	1	9	5	0.555556	3	3	1	35	21	0.6	30	17	0.566667	14	5	0.357143	6	4	0.666667
I	10820198	A-G	+	downstream	C35E7.6	63	19	0.301587	30	7	0.233333	26	6	0.230769	4	1	0.25	9	2	0.222222	3	0	0	35	21	0.6	30	8	0.266667	14	6	0.428571	6	4	0.666667
I	10820199	A-G	+	downstream	C35E7.6	63	11	0.174603	30	7	0.233333	26	6	0.230769	4	0	0	9	0	0	3	1	0.333333	35	9	0.257143	30	6	0.2	14	3	0.214286	6	2	0.333333
I	10820203	A-G	+	downstream	C35E7.6	63	18	0.285714	31	8	0.258065	26	8	0.307692	4	1	0.25	9	2	0.222222	3	2	0.666667	35	4	0.114286	31	5	0.16129	14	2	0.142857	6	1	0.166667
I	10820204	A-G	+	downstream	C35E7.6	64	57	0.890625	31	27	0.870968	26	23	0.884615	4	4	1	9	6	0.666667	3	3	1	35	20	0.571429	32	22	0.6875	14	10	0.714286	6	4	0.666667
I	10820218	A-G	+	downstream	C35E7.6	67	48	0.716418	28	24	0.857143	26	18	0.692308	4	2	0.5	9	7	0.777778	3	2	0.666667	36	16	0.444444	31	13	0.419355	14	6	0.428571	5	1	0.2
I	10820223	A-G	+	downstream	C35E7.6	74	4	0.0540541	29	1	0.0344828	26	0	0	4	0	0	9	0	0	3	1	0.333333	38	1	0.0263158	29	1	0.0344828	14	0	0	6	0	0
I	10820235	A-G	+	downstream	C35E7.6	75	10	0.133333	26	3	0.115385	24	2	0.0833333	3	1	0.333333	7	0	0	3	1	0.333333	36	0	0	28	3	0.107143	12	0	0	5	0	0
I	10820240	A-G	+	downstream	C35E7.6	68	44	0.647059	25	19	0.76	23	14	0.608696	2	2	1	6	3	0.5	3	2	0.666667	32	7	0.21875	23	10	0.434783	12	2	0.166667	5	2	0.4
I	10820241	A-G	+	downstream	C35E7.6	70	33	0.471429	25	10	0.4	24	15	0.625	2	1	0.5	6	0	0	3	2	0.666667	32	6	0.1875	23	8	0.347826	12	1	0.0833333	5	1	0.2
I	10820242	A-G	+	downstream	C35E7.6	71	21	0.295775	24	9	0.375	25	9	0.36	2	0	0	7	0	0	3	2	0.666667	32	0	0	23	1	0.0434783	12	1	0.0833333	5	0	0
I	10820246	A-G	+	downstream	C35E7.6	71	13	0.183099	24	1	0.0416667	26	5	0.192308	2	1	0.5	8	1	0.125	3	1	0.333333	32	2	0.0625	23	2	0.0869565	12	0	0	5	0	0
I	10820247	A-G	+	downstream	C35E7.6	72	5	0.0694444	24	3	0.125	26	3	0.115385	2	0	0	9	0	0	3	1	0.333333	32	0	0	23	1	0.0434783	12	1	0.0833333	5	0	0
I	10820250	A-G	+	downstream	C35E7.6	73	43	0.589041	25	15	0.6	26	10	0.384615	2	0	0	9	2	0.222222	3	2	0.666667	32	14	0.4375	23	10	0.434783	12	2	0.166667	5	2	0.4
I	10820251	A-G	+	downstream	C35E7.6	73	3	0.0410959	25	0	0	26	1	0.0384615	2	0	0	9	0	0	3	0	0	32	1	0.03125	23	2	0.0869565	13	3	0.230769	5	1	0.2
I	10820253	A-G	+	downstream	C35E7.6	73	26	0.356164	24	7	0.291667	26	11	0.423077	2	1	0.5	8	1	0.125	3	1	0.333333	32	6	0.1875	22	9	0.409091	13	5	0.384615	5	1	0.2
I	10820254	A-G	+	downstream	C35E7.6	71	8	0.112676	24	2	0.0833333	25	1	0.04	2	1	0.5	9	1	0.111111	3	0	0	32	1	0.03125	23	2	0.0869565	14	1	0.0714286	4	0	0
I	10820259	A-G	+	downstream	C35E7.6	58	4	0.0689655	17	2	0.117647	19	1	0.0526316	1	0	0	10	0	0	2	0	0	28	4	0.142857	17	0	0	11	1	0.0909091	2	0	0
I	10820263	A-G	+	downstream	C35E7.6	53	19	0.358491	14	8	0.571429	17	5	0.294118	1	0	0	9	0	0	2	0	0	24	1	0.0416667	14	3	0.214286	10	0	0	0	0	-
I	10820264	A-G	+	downstream	C35E7.6	55	18	0.327273	13	8	0.615385	18	6	0.333333	1	0	0	9	0	0	2	0	0	24	1	0.0416667	14	2	0.142857	10	0	0	0	0	-
I	10820275	A-G	+	downstream	C35E7.6	57	26	0.45614	16	9	0.5625	21	8	0.380952	1	0	0	9	1	0.111111	3	3	1	31	12	0.387097	20	6	0.3	9	3	0.333333	0	0	-
I	10820276	A-G	+	downstream	C35E7.6	58	28	0.482759	16	9	0.5625	22	11	0.5	1	0	0	9	0	0	3	3	1	31	8	0.258065	19	5	0.263158	9	0	0	0	0	-
I	10820281	A-G	+	downstream	C35E7.6	59	44	0.745763	18	11	0.611111	23	17	0.73913	1	1	1	9	6	0.666667	3	2	0.666667	32	19	0.59375	21	17	0.809524	11	5	0.454545	0	0	-
I	10820291	A-G	+	downstream	C35E7.6	59	5	0.0847458	19	0	0	23	2	0.0869565	1	0	0	9	2	0.222222	4	1	0.25	32	5	0.15625	22	6	0.272727	11	1	0.0909091	0	0	-
I	10820292	A-G	+	downstream	C35E7.6	59	2	0.0338983	19	0	0	23	0	0	1	0	0	9	0	0	4	0	0	32	0	0	22	5	0.227273	11	1	0.0909091	0	0	-
I	10820293	A-G	+	downstream	C35E7.6	59	5	0.0847458	19	0	0	23	0	0	1	0	0	9	0	0	4	0	0	32	3	0.09375	21	0	0	11	1	0.0909091	0	0	-
I	10820295	A-G	+	downstream	C35E7.6	59	28	0.474576	17	5	0.294118	23	8	0.347826	1	0	0	9	2	0.222222	4	1	0.25	32	30	0.9375	22	21	0.954545	11	10	0.909091	0	0	-
I	10820301	A-G	+	downstream	C35E7.6	60	24	0.4	18	8	0.444444	23	6	0.26087	1	0	0	13	4	0.307692	5	2	0.4	35	3	0.0857143	24	4	0.166667	12	2	0.166667	0	0	-
I	10820302	A-G	+	downstream	C35E7.6	60	49	0.816667	19	15	0.789474	22	15	0.681818	1	1	1	13	9	0.692308	5	5	1	35	6	0.171429	24	6	0.25	12	3	0.25	0	0	-
I	10820303	A-G	+	downstream	C35E7.6	61	59	0.967213	19	18	0.947368	23	22	0.956522	1	1	1	14	14	1	5	5	1	35	5	0.142857	24	6	0.25	12	2	0.166667	0	0	-
I	10820304	A-G	+	downstream	C35E7.6	62	54	0.870968	19	19	1	22	22	1	1	1	1	15	15	1	5	5	1	35	4	0.114286	24	6	0.25	12	1	0.0833333	0	0	-
I	10820308	A-G	+	downstream	C35E7.6	67	2	0.0298507	20	1	0.05	22	1	0.0454545	1	0	0	19	0	0	5	0	0	38	3	0.0789474	28	0	0	12	0	0	0	0	-
I	10820310	A-G	+	downstream	C35E7.6	67	3	0.0447761	21	4	0.190476	23	1	0.0434783	1	0	0	21	0	0	5	0	0	39	0	0	28	0	0	12	0	0	0	0	-
I	10820316	A-G	+	downstream	C35E7.6	69	53	0.768116	20	16	0.8	26	17	0.653846	1	1	1	21	13	0.619048	5	2	0.4	39	25	0.641026	29	23	0.793103	12	8	0.666667	0	0	-
I	10820320	A-G	+	downstream	C35E7.6	73	3	0.0410959	22	2	0.0909091	32	3	0.09375	1	0	0	22	0	0	7	3	0.428571	46	1	0.0217391	35	3	0.0857143	13	1	0.0769231	0	0	-
I	10820321	A-G	+	downstream	C35E7.6	76	27	0.355263	28	9	0.321429	35	10	0.285714	3	1	0.333333	25	3	0.12	8	4	0.5	51	10	0.196078	42	20	0.47619	13	1	0.0769231	0	0	-
I	10820322	A-G	+	downstream	C35E7.6	79	30	0.379747	30	12	0.4	36	11	0.305556	4	1	0.25	25	3	0.12	9	5	0.555556	54	23	0.425926	46	27	0.586957	13	4	0.307692	0	0	-
I	10820323	A-G	+	downstream	C35E7.6	83	7	0.0843373	31	2	0.0645161	37	4	0.108108	4	0	0	25	1	0.04	9	0	0	53	13	0.245283	48	18	0.375	14	2	0.142857	0	0	-
I	10820331	A-G	+	downstream	C35E7.6	100	18	0.18	38	15	0.394737	49	5	0.102041	4	0	0	29	2	0.0689655	11	5	0.454545	63	8	0.126984	52	18	0.346154	16	2	0.125	0	0	-
I	10820332	A-G	+	downstream	C35E7.6	100	3	0.03	38	3	0.0789474	49	5	0.102041	4	0	0	29	1	0.0344828	11	2	0.181818	63	6	0.0952381	51	15	0.294118	15	0	0	0	0	-
I	10820333	A-G	+	downstream	C35E7.6	103	20	0.194175	39	13	0.333333	49	9	0.183673	4	0	0	29	2	0.0689655	12	4	0.333333	64	6	0.09375	53	17	0.320755	15	2	0.133333	0	0	-
I	10820348	A-G	+	downstream	C35E7.6	156	65	0.416667	59	22	0.372881	71	19	0.267606	8	2	0.25	29	9	0.310345	23	10	0.434783	91	17	0.186813	81	25	0.308642	16	3	0.1875	2	0	0
I	10820350	A-G	+	downstream	C35E7.6	167	108	0.646707	64	44	0.6875	80	43	0.5375	13	9	0.692308	31	14	0.451613	24	18	0.75	95	18	0.189474	85	28	0.329412	16	1	0.0625	3	0	0
I	10820353	A-G	+	downstream	C35E7.6	177	79	0.446328	67	42	0.626866	88	22	0.25	14	6	0.428571	32	11	0.34375	26	19	0.730769	100	16	0.16	104	33	0.317308	17	3	0.176471	3	0	0
I	10820357	A-G	+	downstream	C35E7.6	185	28	0.151351	72	23	0.319444	89	9	0.101124	13	3	0.230769	32	3	0.09375	25	11	0.44	104	7	0.0673077	107	4	0.0373832	19	2	0.105263	3	0	0
I	10820366	A-G	+	downstream	C35E7.6	204	50	0.245098	78	20	0.25641	95	28	0.294737	14	1	0.0714286	35	6	0.171429	30	9	0.3	108	36	0.333333	123	53	0.430894	33	13	0.393939	3	3	1
I	10820367	A-G	+	downstream	C35E7.6	206	83	0.402913	78	45	0.576923	96	37	0.385417	14	6	0.428571	36	13	0.361111	32	14	0.4375	109	39	0.357798	123	35	0.284553	32	10	0.3125	3	1	0.333333
I	10820374	A-G	+	downstream	C35E7.6	208	52	0.25	76	21	0.276316	96	16	0.166667	14	6	0.428571	38	2	0.0526316	32	13	0.40625	110	10	0.0909091	128	15	0.117188	34	2	0.0588235	3	0	0
I	10820375	A-G	+	downstream	C35E7.6	212	15	0.0707547	83	7	0.0843373	97	5	0.0515464	14	1	0.0714286	38	1	0.0263158	32	5	0.15625	112	4	0.0357143	130	11	0.0846154	35	1	0.0285714	3	1	0.333333
I	10820376	A-G	+	downstream	C35E7.6	214	19	0.088785	84	9	0.107143	97	6	0.0618557	15	2	0.133333	39	1	0.025641	32	8	0.25	112	3	0.0267857	130	5	0.0384615	35	0	0	3	0	0
I	10820378	A-G	+	downstream	C35E7.6	218	39	0.178899	81	16	0.197531	95	13	0.136842	15	0	0	38	6	0.157895	32	12	0.375	115	8	0.0695652	129	14	0.108527	35	0	0	3	0	0
I	10820393	A-G	+	downstream	C35E7.6	276	24	0.0869565	107	16	0.149533	116	6	0.0517241	24	3	0.125	49	3	0.0612245	37	4	0.108108	129	10	0.0775194	146	8	0.0547945	39	1	0.025641	5	2	0.4
I	10820395	A-G	+	downstream	C35E7.6	287	69	0.240418	117	44	0.376068	127	26	0.204724	25	7	0.28	51	10	0.196078	39	19	0.487179	134	36	0.268657	152	60	0.394737	40	9	0.225	4	3	0.75
I	10820401	A-G	+	downstream	C35E7.6	298	146	0.489933	122	70	0.57377	137	64	0.467153	32	14	0.4375	49	15	0.306122	49	34	0.693878	140	77	0.55	157	98	0.624204	48	28	0.583333	5	4	0.8
I	10820402	A-G	+	downstream	C35E7.6	296	111	0.375	121	49	0.404959	134	38	0.283582	32	14	0.4375	49	9	0.183673	50	22	0.44	139	60	0.431655	157	80	0.509554	47	23	0.489362	5	1	0.2
I	10820405	A-G	+	downstream	C35E7.6	302	31	0.102649	126	12	0.0952381	140	7	0.05	32	3	0.09375	47	6	0.12766	49	8	0.163265	141	8	0.0567376	157	11	0.0700637	48	3	0.0625	5	0	0
I	10820407	A-G	+	downstream	C35E7.6	303	256	0.844884	128	114	0.890625	140	115	0.821429	32	30	0.9375	46	34	0.73913	49	45	0.918367	141	80	0.567376	160	96	0.6	48	27	0.5625	5	2	0.4
I	10820408	A-G	+	downstream	C35E7.6	304	223	0.733553	124	89	0.717742	138	97	0.702899	32	25	0.78125	46	31	0.673913	50	37	0.74	140	60	0.428571	157	66	0.420382	48	22	0.458333	5	0	0
I	10820409	A-G	+	downstream	C35E7.6	306	18	0.0588235	129	2	0.0155039	138	8	0.057971	32	0	0	44	1	0.0227273	49	5	0.102041	139	1	0.00719424	156	0	0	48	1	0.0208333	5	0	0
I	10820416	A-G	+	downstream	C35E7.6	311	66	0.212219	135	46	0.340741	142	25	0.176056	32	8	0.25	47	9	0.191489	51	31	0.607843	143	5	0.034965	150	12	0.08	48	2	0.0416667	6	0	0
I	10820417	A-G	+	downstream	C35E7.6	311	201	0.646302	137	98	0.715328	145	93	0.641379	32	21	0.65625	50	33	0.66	52	42	0.807692	142	18	0.126761	151	43	0.284768	49	8	0.163265	6	2	0.333333
I	10820418	A-G	+	downstream	C35E7.6	311	80	0.257235	134	40	0.298507	143	27	0.188811	32	7	0.21875	50	16	0.32	52	30	0.576923	140	3	0.0214286	149	20	0.134228	46	7	0.152174	6	1	0.166667
I	10820419	A-G	+	downstream	C35E7.6	311	6	0.0192926	137	9	0.0656934	142	2	0.0140845	32	0	0	53	1	0.0188679	51	5	0.0980392	140	0	0	149	0	0	47	0	0	6	0	0
I	10820421	A-G	+	downstream	C35E7.6	299	0	0	133	1	0.0075188	143	1	0.00699301	32	0	0	51	0	0	51	4	0.0784314	135	0	0	146	0	0	47	1	0.0212766	6	0	0
I	10820423	A-G	+	downstream	C35E7.6	297	19	0.0639731	133	13	0.0977444	143	7	0.048951	32	2	0.0625	53	1	0.0188679	51	13	0.254902	133	1	0.0075188	150	7	0.0466667	47	0	0	6	0	0
I	10820425	A-G	+	downstream	C35E7.6	295	30	0.101695	133	26	0.195489	138	14	0.101449	32	2	0.0625	53	2	0.0377358	50	20	0.4	129	4	0.0310078	149	9	0.0604027	45	1	0.0222222	6	0	0
I	10820426	A-G	+	downstream	C35E7.6	287	3	0.010453	132	3	0.0227273	138	0	0	32	0	0	53	0	0	52	5	0.0961538	129	0	0	149	1	0.00671141	45	0	0	6	0	0
I	10820431	A-G	+	downstream	C35E7.6	281	6	0.0213523	127	5	0.0393701	130	1	0.00769231	32	0	0	48	1	0.0208333	51	3	0.0588235	124	1	0.00806452	154	2	0.012987	42	1	0.0238095	6	0	0
I	10820442	A-G	+	downstream	C35E7.6	291	46	0.158076	134	22	0.164179	134	16	0.119403	32	2	0.0625	54	6	0.111111	53	19	0.358491	139	6	0.0431655	129	9	0.0697674	45	1	0.0222222	6	0	0
I	10820444	A-G	+	downstream	C35E7.6	292	24	0.0821918	137	16	0.116788	139	14	0.100719	32	1	0.03125	54	3	0.0555556	53	8	0.150943	141	2	0.0141844	127	3	0.023622	45	2	0.0444444	6	0	0
I	10820450	A-G	+	downstream	C35E7.6	295	42	0.142373	140	36	0.257143	136	10	0.0735294	32	4	0.125	55	3	0.0545455	54	19	0.351852	148	4	0.027027	164	6	0.0365854	46	3	0.0652174	6	1	0.166667
I	10820451	A-G	+	downstream	C35E7.6	295	86	0.291525	138	55	0.398551	135	28	0.207407	32	14	0.4375	55	10	0.181818	54	33	0.611111	149	14	0.0939597	165	18	0.109091	46	6	0.130435	6	0	0
I	10820462	A-G	+	downstream	C35E7.6	298	49	0.16443	141	23	0.163121	137	20	0.145985	33	4	0.121212	54	10	0.185185	55	13	0.236364	156	8	0.0512821	190	22	0.115789	44	3	0.0681818	6	0	0
I	10820464	A-G	+	downstream	C35E7.6	302	139	0.460265	144	83	0.576389	139	61	0.438849	33	22	0.666667	53	15	0.283019	54	30	0.555556	159	12	0.0754717	199	34	0.170854	45	2	0.0444444	6	0	0
I	10820465	A-G	+	downstream	C35E7.6	306	267	0.872549	143	129	0.902098	136	117	0.860294	33	31	0.939394	54	41	0.759259	55	51	0.927273	158	80	0.506329	199	120	0.603015	45	24	0.533333	6	2	0.333333
I	10820466	A-G	+	downstream	C35E7.6	304	26	0.0855263	141	13	0.0921986	138	9	0.0652174	33	2	0.0606061	53	1	0.0188679	52	7	0.134615	159	20	0.125786	202	37	0.183168	47	11	0.234043	6	0	0
I	10820467	A-G	+	downstream	C35E7.6	302	67	0.221854	141	33	0.234043	138	16	0.115942	33	8	0.242424	51	5	0.0980392	51	18	0.352941	156	25	0.160256	204	62	0.303922	48	10	0.208333	6	2	0.333333
I	10820475	A-G	+	downstream	C35E7.6	304	236	0.776316	148	126	0.851351	139	108	0.776978	33	27	0.818182	50	36	0.72	60	57	0.95	159	70	0.440252	213	110	0.516432	52	21	0.403846	6	4	0.666667
I	10820480	A-G	+	downstream	C35E7.6	315	5	0.015873	152	5	0.0328947	141	5	0.035461	33	1	0.030303	50	0	0	56	4	0.0714286	165	0	0	221	7	0.0316742	55	0	0	8	0	0
I	10820488	A-G	+	downstream	C35E7.6	319	139	0.435737	147	60	0.408163	140	57	0.407143	32	15	0.46875	54	20	0.37037	59	36	0.610169	180	27	0.15	206	44	0.213592	57	6	0.105263	8	0	0
I	10820496	A-G	+	downstream	C35E7.6	335	5	0.0149254	154	7	0.0454545	143	3	0.020979	34	0	0	57	0	0	64	4	0.0625	192	4	0.0208333	230	20	0.0869565	57	2	0.0350877	10	1	0.1
I	10820497	A-G	+	downstream	C35E7.6	336	164	0.488095	154	86	0.558442	142	45	0.316901	33	18	0.545455	57	17	0.298246	63	37	0.587302	190	59	0.310526	230	116	0.504348	58	16	0.275862	10	5	0.5
I	10820499	A-G	+	downstream	C35E7.6	335	56	0.167164	157	29	0.184713	141	30	0.212766	34	5	0.147059	57	13	0.22807	61	13	0.213115	189	41	0.216931	239	50	0.209205	58	9	0.155172	11	0	0
I	10820505	A-G	+	downstream	C35E7.6	343	1	0.00291545	162	3	0.0185185	147	1	0.00680272	34	0	0	56	0	0	64	5	0.078125	205	2	0.0097561	254	6	0.023622	65	1	0.0153846	12	0	0
I	10820506	A-G	+	downstream	C35E7.6	342	10	0.0292398	161	13	0.0807453	147	5	0.0340136	34	1	0.0294118	56	0	0	63	10	0.15873	204	5	0.0245098	257	16	0.0622568	65	1	0.0153846	12	0	0
I	10820507	A-G	+	downstream	C35E7.6	341	17	0.0498534	162	35	0.216049	147	11	0.0748299	34	1	0.0294118	56	5	0.0892857	64	19	0.296875	203	4	0.0197044	261	16	0.0613027	66	4	0.0606061	12	1	0.0833333
I	10820508	A-G	+	downstream	C35E7.6	342	43	0.125731	162	39	0.240741	147	19	0.129252	34	6	0.176471	56	3	0.0535714	64	18	0.28125	206	3	0.0145631	262	18	0.0687023	66	3	0.0454545	12	0	0
I	10820522	A-G	+	downstream	C35E7.6	313	18	0.057508	148	21	0.141892	126	7	0.0555556	29	2	0.0689655	44	0	0	57	5	0.0877193	205	5	0.0243902	247	16	0.0647773	68	2	0.0294118	12	1	0.0833333
I	10871443	A-G	-	intron	Y37F4.6	0	0	-	0	0	-	0	0	-	0	0	-	0	0	-	0	0	-	0	0	-	0	0	-	0	0	-	0	0	-
I	10871444	A-G	-	intron	Y37F4.6	0	0	-	0	0	-	0	0	-	0	0	-	0	0	-	0	0	-	0	0	-	0	0	-	0	0	-	0	0	-
I	10871461	A-G	-	intron	Y37F4.6	0	0	-	0	0	-	0	0	-	0	0	-	0	0	-	0	0	-	0	0	-	0	0	-	0	0	-	0	0	-
I	10871465	A-G	-	intron	Y37F4.6	0	0	-	0	0	-	0	0	-	0	0	-	0	0	-	0	0	-	0	0	-	0	0	-	0	0	-	0	0	-
I	10871483	A-G	-	intron	Y37F4.6	0	0	-	0	0	-	0	0	-	0	0	-	0	0	-	0	0	-	0	0	-	0	0	-	0	0	-	0	0	-
I	10871487	A-G	-	intron	Y37F4.6	0	0	-	0	0	-	0	0	-	0	0	-	0	0	-	0	0	-	0	0	-	0	0	-	0	0	-	0	0	-
I	10871493	A-G	-	intron	Y37F4.6	0	0	-	0	0	-	0	0	-	0	0	-	0	0	-	0	0	-	0	0	-	0	0	-	0	0	-	0	0	-
I	10939332	A-G	+	intron	F49D11.1	0	0	-	3	3	1	0	0	-	0	0	-	0	0	-	0	0	-	0	0	-	2	1	0.5	0	0	-	0	0	-
I	10939333	A-G	+	intron	F49D11.1	0	0	-	3	2	0.666667	0	0	-	0	0	-	0	0	-	0	0	-	0	0	-	2	1	0.5	0	0	-	0	0	-
I	10939347	A-G	+	intron	F49D11.1	0	0	-	3	2	0.666667	0	0	-	0	0	-	0	0	-	2	1	0.5	0	0	-	2	1	0.5	0	0	-	0	0	-
I	10939348	A-G	+	intron	F49D11.1	0	0	-	4	3	0.75	0	0	-	0	0	-	0	0	-	2	0	0	0	0	-	2	1	0.5	0	0	-	0	0	-
I	10939352	A-G	+	intron	F49D11.1	0	0	-	4	3	0.75	0	0	-	0	0	-	0	0	-	2	2	1	0	0	-	2	1	0.5	1	1	1	0	0	-
I	10939364	A-G	+	intron	F49D11.1	0	0	-	4	4	1	0	0	-	0	0	-	0	0	-	2	2	1	0	0	-	2	2	1	1	0	0	0	0	-
I	10939369	A-G	+	intron	F49D11.1	0	0	-	4	3	0.75	0	0	-	0	0	-	0	0	-	2	0	0	0	0	-	2	1	0.5	1	1	1	0	0	-
I	10939378	A-G	+	intron	F49D11.1	0	0	-	4	4	1	0	0	-	0	0	-	0	0	-	2	2	1	0	0	-	2	2	1	1	1	1	0	0	-
I	10939379	A-G	+	intron	F49D11.1	0	0	-	4	2	0.5	0	0	-	0	0	-	0	0	-	2	0	0	0	0	-	2	0	0	1	0	0	0	0	-
I	10939385	A-G	+	intron	F49D11.1	0	0	-	4	3	0.75	0	0	-	0	0	-	0	0	-	2	1	0.5	0	0	-	1	0	0	1	0	0	0	0	-
I	10939390	A-G	+	intron	F49D11.1	0	0	-	4	4	1	0	0	-	0	0	-	0	0	-	2	1	0.5	0	0	-	2	2	1	1	0	0	0	0	-
I	10939400	A-G	+	intron	F49D11.1	0	0	-	4	4	1	0	0	-	0	0	-	0	0	-	2	2	1	0	0	-	2	0	0	1	0	0	0	0	-
I	10939403	A-G	+	intron	F49D11.1	0	0	-	4	1	0.25	0	0	-	0	0	-	0	0	-	2	1	0.5	0	0	-	2	0	0	1	0	0	0	0	-
I	10944756	A-G	+	intron	Y95D11A.1	0	0	-	1	1	1	0	0	-	0	0	-	1	1	1	2	2	1	0	0	-	0	0	-	0	0	-	0	0	-
I	10945109	A-G	+	intron	Y95D11A.1	2	0	0	6	2	0.333333	0	0	-	0	0	-	0	0	-	0	0	-	1	0	0	0	0	-	0	0	-	0	0	-
I	10945120	A-G	+	intron	Y95D11A.1	2	1	0.5	7	4	0.571429	0	0	-	0	0	-	0	0	-	0	0	-	1	0	0	0	0	-	0	0	-	0	0	-
I	10945121	A-G	+	intron	Y95D11A.1	2	0	0	7	2	0.285714	0	0	-	0	0	-	0	0	-	0	0	-	1	0	0	0	0	-	0	0	-	0	0	-
I	10945130	A-G	+	intron	Y95D11A.1	2	0	0	7	2	0.285714	1	0	0	0	0	-	0	0	-	0	0	-	1	0	0	0	0	-	0	0	-	0	0	-
I	10979866	A-G	-	3UTR/intron	Y52B11A.4	0	0	-	0	0	-	0	0	-	0	0	-	0	0	-	0	0	-	0	0	-	0	0	-	0	0	-	0	0	-
I	11011466	A-G	+	upstream	Y52B11A.12	0	0	-	0	0	-	4	2	0.5	0	0	-	0	0	-	0	0	-	0	0	-	0	0	-	2	0	0	0	0	-
I	11011467	A-G	+	upstream	Y52B11A.12	0	0	-	0	0	-	4	2	0.5	0	0	-	0	0	-	0	0	-	0	0	-	0	0	-	2	0	0	0	0	-
I	11011468	A-G	+	upstream	Y52B11A.12	0	0	-	0	0	-	4	2	0.5	0	0	-	0	0	-	0	0	-	0	0	-	0	0	-	2	0	0	0	0	-
I	11011472	A-G	+	upstream	Y52B11A.12	0	0	-	0	0	-	4	2	0.5	0	0	-	0	0	-	0	0	-	0	0	-	0	0	-	2	0	0	0	0	-
I	11011478	A-G	+	upstream	Y52B11A.12	0	0	-	0	0	-	4	2	0.5	0	0	-	0	0	-	0	0	-	0	0	-	0	0	-	2	0	0	0	0	-
I	11011486	A-G	+	upstream	Y52B11A.12	0	0	-	0	0	-	4	2	0.5	0	0	-	0	0	-	0	0	-	0	0	-	1	0	0	2	0	0	0	0	-
I	11011489	A-G	+	upstream	Y52B11A.12	0	0	-	0	0	-	4	2	0.5	0	0	-	0	0	-	0	0	-	0	0	-	1	0	0	2	0	0	0	0	-
I	11011522	A-G	+	upstream	Y52B11A.12	0	0	-	0	0	-	6	2	0.333333	0	0	-	0	0	-	0	0	-	0	0	-	2	1	0.5	1	0	0	0	0	-
I	11012069	A-G	+	upstream	Y52B11A.12	0	0	-	1	1	1	1	1	1	0	0	-	0	0	-	0	0	-	0	0	-	0	0	-	0	0	-	0	0	-
I	11012070	A-G	-	intron/noncoding	Y52B11A.13	0	0	-	1	0	0	1	0	0	0	0	-	0	0	-	0	0	-	0	0	-	0	0	-	0	0	-	0	0	-
I	11012074	A-G	+	upstream	Y52B11A.12	0	0	-	1	1	1	1	1	1	0	0	-	0	0	-	0	0	-	0	0	-	0	0	-	0	0	-	0	0	-
I	11012081	A-G	-	intron/noncoding	Y52B11A.13	0	0	-	1	0	0	1	0	0	0	0	-	0	0	-	0	0	-	0	0	-	0	0	-	0	0	-	0	0	-
I	11012190	A-G	-	intron/noncoding	Y52B11A.13	0	0	-	0	0	-	1	0	0	0	0	-	0	0	-	0	0	-	0	0	-	1	0	0	0	0	-	0	0	-
I	11012304	A-G	-	intron/noncoding	Y52B11A.13	0	0	-	0	0	-	1	0	0	0	0	-	0	0	-	0	0	-	0	0	-	1	0	0	0	0	-	0	0	-
I	11012354	A-G	-	intron/noncoding	Y52B11A.13	0	0	-	0	0	-	2	0	0	0	0	-	0	0	-	0	0	-	0	0	-	0	0	-	0	0	-	0	0	-
I	11012356	A-G	-	intron/noncoding	Y52B11A.13	0	0	-	0	0	-	2	0	0	0	0	-	0	0	-	0	0	-	0	0	-	0	0	-	0	0	-	0	0	-
I	11012358	A-G	+	upstream	Y52B11A.12	0	0	-	0	0	-	2	2	1	0	0	-	0	0	-	0	0	-	0	0	-	0	0	-	0	0	-	0	0	-
I	11012361	A-G	-	intron/noncoding	Y52B11A.13	0	0	-	0	0	-	2	0	0	0	0	-	0	0	-	0	0	-	0	0	-	0	0	-	0	0	-	0	0	-
I	11012373	A-G	-	intron/noncoding	Y52B11A.13	0	0	-	0	0	-	2	0	0	0	0	-	0	0	-	0	0	-	0	0	-	0	0	-	0	0	-	0	0	-
I	11012445	A-G	-	intron/noncoding	Y52B11A.13	0	0	-	0	0	-	1	0	0	0	0	-	0	0	-	0	0	-	0	0	-	0	0	-	0	0	-	0	0	-
I	11012446	A-G	-	intron/noncoding	Y52B11A.13	0	0	-	0	0	-	1	0	0	0	0	-	0	0	-	0	0	-	0	0	-	0	0	-	0	0	-	0	0	-
I	11012755	A-G	-	intron/noncoding	Y52B11A.13	0	0	-	0	0	-	0	0	-	1	0	0	0	0	-	0	0	-	0	0	-	0	0	-	0	0	-	0	0	-
I	11012771	A-G	-	intron/noncoding	Y52B11A.13	0	0	-	0	0	-	0	0	-	1	0	0	0	0	-	0	0	-	0	0	-	0	0	-	0	0	-	0	0	-
I	11012793	A-G	-	intron/noncoding	Y52B11A.13	0	0	-	0	0	-	0	0	-	1	0	0	0	0	-	0	0	-	0	0	-	0	0	-	0	0	-	0	0	-
I	11012798	A-G	-	intron/noncoding	Y52B11A.13	0	0	-	0	0	-	0	0	-	1	0	0	0	0	-	0	0	-	0	0	-	0	0	-	0	0	-	0	0	-
I	11013045	A-G	+	CDS/noncoding	Y52B11A.12	23	0	0	2	2	1	4	4	1	0	0	-	1	0	0	9	0	0	27	0	0	5	0	0	2	2	1	0	0	-
I	11013051	A-G	+	CDS/noncoding	Y52B11A.12	23	0	0	1	1	1	4	1	0.25	0	0	-	1	0	0	10	0	0	27	0	0	5	0	0	2	0	0	0	0	-
I	11013067	A-G	+	CDS/noncoding	Y52B11A.12	25	0	0	3	0	0	3	2	0.666667	0	0	-	1	0	0	13	0	0	28	0	0	5	0	0	2	1	0.5	0	0	-
I	11013075	A-G	+	CDS/noncoding	Y52B11A.12	29	0	0	3	2	0.666667	3	1	0.333333	0	0	-	1	0	0	15	0	0	32	0	0	5	0	0	2	0	0	0	0	-
I	11013150	A-G	+	CDS/noncoding	Y52B11A.12	25	0	0	3	2	0.666667	1	1	1	0	0	-	0	0	-	13	0	0	18	0	0	1	0	0	1	0	0	0	0	-
I	11013456	A-G	+	CDS/noncoding	Y52B11A.12	10	0	0	1	0	0	2	2	1	0	0	-	0	0	-	4	0	0	8	0	0	0	0	-	0	0	-	0	0	-
I	11013614	A-G	-	intron/noncoding	null	15	0	0	1	0	0	2	0	0	1	0	0	0	0	-	11	0	0	18	0	0	1	0	0	0	0	-	0	0	-
I	11013661	A-G	-	intron/noncoding	null	15	0	0	1	0	0	1	0	0	2	0	0	0	0	-	5	0	0	18	0	0	1	0	0	0	0	-	0	0	-
I	11013662	A-G	-	intron/noncoding	null	15	0	0	1	0	0	1	0	0	2	0	0	0	0	-	5	0	0	18	0	0	1	0	0	0	0	-	0	0	-
I	11013747	A-G	-	intron/noncoding	null	23	0	0	1	0	0	1	0	0	1	0	0	0	0	-	5	0	0	23	0	0	3	0	0	0	0	-	0	0	-
I	11035932	A-G	-	intron	Y52B11A.9	0	0	-	0	0	-	0	0	-	0	0	-	0	0	-	0	0	-	0	0	-	0	0	-	0	0	-	0	0	-
I	11035940	A-G	-	intron	Y52B11A.9	0	0	-	0	0	-	0	0	-	0	0	-	0	0	-	0	0	-	0	0	-	0	0	-	0	0	-	0	0	-
I	11035941	A-G	-	intron	Y52B11A.9	0	0	-	0	0	-	0	0	-	0	0	-	0	0	-	0	0	-	0	0	-	0	0	-	0	0	-	0	0	-
I	11035971	A-G	-	intron	Y52B11A.9	0	0	-	0	0	-	0	0	-	0	0	-	0	0	-	0	0	-	0	0	-	0	0	-	0	0	-	0	0	-
I	11057054	A-G	-	integenic	-	0	0	-	0	0	-	0	0	-	0	0	-	0	0	-	0	0	-	0	0	-	0	0	-	0	0	-	0	0	-
I	11057056	A-G	-	integenic	-	0	0	-	0	0	-	0	0	-	0	0	-	0	0	-	0	0	-	0	0	-	0	0	-	0	0	-	0	0	-
I	11057057	A-G	-	integenic	-	0	0	-	0	0	-	0	0	-	0	0	-	0	0	-	0	0	-	0	0	-	0	0	-	0	0	-	0	0	-
I	11057088	A-G	-	integenic	-	0	0	-	0	0	-	0	0	-	0	0	-	0	0	-	0	0	-	0	0	-	0	0	-	0	0	-	0	0	-
I	11057093	A-G	-	integenic	-	0	0	-	0	0	-	0	0	-	0	0	-	0	0	-	0	0	-	0	0	-	0	0	-	0	0	-	0	0	-
I	11057109	A-G	-	integenic	-	0	0	-	0	0	-	0	0	-	0	0	-	0	0	-	0	0	-	0	0	-	0	0	-	0	0	-	0	0	-
I	11057114	A-G	-	integenic	-	0	0	-	0	0	-	0	0	-	0	0	-	0	0	-	0	0	-	0	0	-	0	0	-	0	0	-	0	0	-
I	11057144	A-G	-	integenic	-	0	0	-	0	0	-	0	0	-	0	0	-	0	0	-	0	0	-	0	0	-	0	0	-	0	0	-	0	0	-
I	11083215	A-G	-	intron	W02B9.1	0	0	-	0	0	-	0	0	-	0	0	-	0	0	-	0	0	-	0	0	-	0	0	-	0	0	-	0	0	-
I	11083222	A-G	-	intron	W02B9.1	0	0	-	0	0	-	0	0	-	0	0	-	0	0	-	0	0	-	0	0	-	0	0	-	0	0	-	0	0	-
I	11083234	A-G	-	intron	W02B9.1	0	0	-	0	0	-	0	0	-	0	0	-	0	0	-	0	0	-	0	0	-	0	0	-	0	0	-	0	0	-
I	11083235	A-G	-	intron	W02B9.1	0	0	-	0	0	-	0	0	-	0	0	-	0	0	-	0	0	-	0	0	-	0	0	-	0	0	-	0	0	-
I	11083258	A-G	-	intron	W02B9.1	0	0	-	0	0	-	0	0	-	0	0	-	0	0	-	0	0	-	0	0	-	0	0	-	0	0	-	0	0	-
I	11165615	A-G	-	intron	Y52B11C.1	0	0	-	0	0	-	0	0	-	0	0	-	0	0	-	0	0	-	0	0	-	0	0	-	0	0	-	0	0	-
I	11165620	A-G	-	intron	Y52B11C.1	0	0	-	0	0	-	0	0	-	0	0	-	0	0	-	0	0	-	0	0	-	0	0	-	0	0	-	0	0	-
I	11165621	A-G	-	intron	Y52B11C.1	0	0	-	0	0	-	0	0	-	0	0	-	0	0	-	0	0	-	0	0	-	0	0	-	0	0	-	0	0	-
I	11165630	A-G	-	intron	Y52B11C.1	0	0	-	0	0	-	0	0	-	0	0	-	0	0	-	0	0	-	0	0	-	0	0	-	0	0	-	0	0	-
I	11165637	A-G	-	intron	Y52B11C.1	0	0	-	0	0	-	0	0	-	0	0	-	0	0	-	0	0	-	0	0	-	0	0	-	0	0	-	0	0	-
I	11165645	A-G	-	intron	Y52B11C.1	0	0	-	0	0	-	0	0	-	0	0	-	0	0	-	0	0	-	0	0	-	0	0	-	0	0	-	0	0	-
I	11165662	A-G	-	intron	Y52B11C.1	0	0	-	0	0	-	0	0	-	0	0	-	0	0	-	0	0	-	0	0	-	0	0	-	0	0	-	0	0	-
I	11170081	A-G	-	intron	F28D9.1;F28D9.4;Y52B11C.1	11	0	0	4	0	0	1	0	0	0	0	-	1	0	0	0	0	-	6	0	0	0	0	-	1	0	0	0	0	-
I	11170091	A-G	-	intron	F28D9.1;F28D9.4;Y52B11C.1	7	0	0	4	0	0	1	0	0	0	0	-	1	0	0	0	0	-	3	0	0	0	0	-	0	0	-	0	0	-
I	11170092	A-G	+	antisense	F28D9.1;F28D9.4;Y52B11C.1	7	3	0.428571	4	4	1	1	0	0	0	0	-	1	1	1	0	0	-	3	2	0.666667	0	0	-	0	0	-	0	0	-
I	11170100	A-G	-	intron	F28D9.1;F28D9.4;Y52B11C.1	7	0	0	4	0	0	1	0	0	0	0	-	1	0	0	0	0	-	3	0	0	0	0	-	0	0	-	0	0	-
I	11170102	A-G	+	antisense	F28D9.1;F28D9.4;Y52B11C.1	7	1	0.142857	4	1	0.25	1	0	0	0	0	-	1	1	1	0	0	-	3	0	0	0	0	-	0	0	-	0	0	-
I	11170103	A-G	-	intron	F28D9.1;F28D9.4;Y52B11C.1	7	0	0	4	0	0	1	0	0	0	0	-	1	0	0	0	0	-	3	0	0	0	0	-	0	0	-	0	0	-
I	11170104	A-G	-	intron	F28D9.1;F28D9.4;Y52B11C.1	7	0	0	4	0	0	1	0	0	0	0	-	1	0	0	0	0	-	3	0	0	0	0	-	0	0	-	0	0	-
I	11170105	A-G	-	intron	F28D9.1;F28D9.4;Y52B11C.1	7	0	0	4	0	0	1	0	0	0	0	-	1	0	0	0	0	-	3	0	0	0	0	-	0	0	-	0	0	-
I	11170112	A-G	-	intron	F28D9.1;F28D9.4;Y52B11C.1	4	0	0	2	0	0	1	0	0	0	0	-	1	0	0	0	0	-	2	0	0	0	0	-	0	0	-	0	0	-
I	11170113	A-G	-	intron	F28D9.1;F28D9.4;Y52B11C.1	4	0	0	2	0	0	1	0	0	0	0	-	1	0	0	0	0	-	2	0	0	0	0	-	0	0	-	0	0	-
I	11170114	A-G	-	intron	F28D9.1;F28D9.4;Y52B11C.1	4	0	0	2	0	0	1	0	0	0	0	-	1	0	0	0	0	-	2	0	0	0	0	-	0	0	-	0	0	-
I	11170116	A-G	-	intron	F28D9.1;F28D9.4;Y52B11C.1	4	0	0	2	0	0	1	0	0	0	0	-	1	0	0	0	0	-	2	0	0	0	0	-	0	0	-	0	0	-
I	11170125	A-G	-	intron	F28D9.1;F28D9.4;Y52B11C.1	4	0	0	2	0	0	1	0	0	0	0	-	1	0	0	0	0	-	2	0	0	0	0	-	0	0	-	0	0	-
I	11170126	A-G	-	intron	F28D9.1;F28D9.4;Y52B11C.1	4	0	0	2	0	0	1	0	0	0	0	-	1	0	0	0	0	-	2	0	0	0	0	-	0	0	-	0	0	-
I	11170127	A-G	+	antisense	F28D9.1;F28D9.4;Y52B11C.1	4	3	0.75	2	2	1	1	1	1	0	0	-	1	1	1	0	0	-	2	2	1	0	0	-	0	0	-	0	0	-
I	11170130	A-G	+	antisense	F28D9.1;F28D9.4;Y52B11C.1	5	4	0.8	2	2	1	1	0	0	0	0	-	1	1	1	0	0	-	2	1	0.5	0	0	-	0	0	-	0	0	-
I	11170136	A-G	-	intron	F28D9.1;F28D9.4;Y52B11C.1	5	0	0	2	0	0	1	0	0	0	0	-	1	0	0	0	0	-	2	0	0	0	0	-	0	0	-	0	0	-
I	11170139	A-G	-	intron	F28D9.1;F28D9.4;Y52B11C.1	5	0	0	2	0	0	1	0	0	0	0	-	1	0	0	0	0	-	2	0	0	0	0	-	0	0	-	0	0	-
I	11170140	A-G	+	antisense	F28D9.1;F28D9.4;Y52B11C.1	5	3	0.6	2	2	1	1	1	1	0	0	-	1	0	0	0	0	-	2	2	1	0	0	-	0	0	-	0	0	-
I	11170141	A-G	+	antisense	F28D9.1;F28D9.4;Y52B11C.1	5	4	0.8	2	2	1	1	1	1	0	0	-	1	1	1	0	0	-	2	1	0.5	0	0	-	0	0	-	0	0	-
I	11170147	A-G	-	intron	F28D9.1;F28D9.4;Y52B11C.1	5	0	0	2	0	0	1	0	0	0	0	-	1	0	0	0	0	-	2	0	0	0	0	-	0	0	-	0	0	-
I	11170152	A-G	-	intron	F28D9.1;F28D9.4;Y52B11C.1	5	0	0	2	0	0	1	0	0	0	0	-	0	0	-	0	0	-	1	0	0	0	0	-	0	0	-	0	0	-
I	11170180	A-G	+	antisense	F28D9.1;F28D9.4;Y52B11C.1	4	3	0.75	1	0	0	1	1	1	0	0	-	1	1	1	0	0	-	2	2	1	2	1	0.5	0	0	-	0	0	-
I	11170181	A-G	+	antisense	F28D9.1;F28D9.4;Y52B11C.1	4	1	0.25	1	0	0	1	1	1	0	0	-	1	1	1	0	0	-	2	2	1	2	1	0.5	0	0	-	0	0	-
I	11170184	A-G	-	intron	F28D9.1;F28D9.4;Y52B11C.1	4	0	0	1	0	0	1	0	0	0	0	-	1	0	0	0	0	-	2	0	0	2	0	0	0	0	-	0	0	-
I	11170185	A-G	-	intron	F28D9.1;F28D9.4;Y52B11C.1	4	0	0	1	0	0	1	0	0	0	0	-	1	0	0	0	0	-	2	0	0	2	0	0	0	0	-	0	0	-
I	11170189	A-G	-	intron	F28D9.1;F28D9.4;Y52B11C.1	4	0	0	1	0	0	1	0	0	0	0	-	1	0	0	0	0	-	2	0	0	2	0	0	0	0	-	0	0	-
I	11170191	A-G	+	antisense	F28D9.1;F28D9.4;Y52B11C.1	4	1	0.25	1	0	0	1	0	0	0	0	-	1	0	0	0	0	-	2	1	0.5	2	2	1	0	0	-	0	0	-
I	11170192	A-G	+	antisense	F28D9.1;F28D9.4;Y52B11C.1	4	0	0	1	0	0	1	0	0	0	0	-	1	0	0	0	0	-	2	2	1	2	1	0.5	0	0	-	0	0	-
I	11170193	A-G	+	antisense	F28D9.1;F28D9.4;Y52B11C.1	4	1	0.25	1	1	1	1	0	0	0	0	-	1	0	0	0	0	-	2	1	0.5	2	2	1	0	0	-	0	0	-
I	11170195	A-G	+	antisense	F28D9.1;F28D9.4;Y52B11C.1	4	1	0.25	1	0	0	1	0	0	0	0	-	1	0	0	0	0	-	2	1	0.5	2	1	0.5	0	0	-	0	0	-
I	11170196	A-G	+	antisense	F28D9.1;F28D9.4;Y52B11C.1	4	3	0.75	1	1	1	1	1	1	0	0	-	1	1	1	0	0	-	2	1	0.5	2	2	1	0	0	-	0	0	-
I	11170203	A-G	+	antisense	F28D9.1;F28D9.4;Y52B11C.1	4	3	0.75	1	1	1	1	1	1	0	0	-	1	1	1	0	0	-	2	1	0.5	2	2	1	0	0	-	0	0	-
I	11170207	A-G	-	intron	F28D9.1;F28D9.4;Y52B11C.1	4	0	0	1	0	0	1	0	0	0	0	-	1	0	0	0	0	-	2	0	0	2	0	0	0	0	-	0	0	-
I	11170209	A-G	+	antisense	F28D9.1;F28D9.4;Y52B11C.1	4	2	0.5	1	1	1	1	1	1	0	0	-	1	1	1	0	0	-	2	1	0.5	2	2	1	0	0	-	0	0	-
I	11170216	A-G	-	intron	F28D9.1;F28D9.4;Y52B11C.1	4	0	0	1	0	0	1	0	0	0	0	-	1	0	0	0	0	-	2	0	0	2	0	0	0	0	-	0	0	-
I	11170217	A-G	+	antisense	F28D9.1;F28D9.4;Y52B11C.1	4	3	0.75	1	1	1	1	1	1	0	0	-	1	1	1	0	0	-	2	2	1	2	2	1	0	0	-	0	0	-
I	11170225	A-G	+	antisense	F28D9.1;F28D9.4;Y52B11C.1	4	1	0.25	1	0	0	1	0	0	0	0	-	1	0	0	0	0	-	2	1	0.5	2	1	0.5	0	0	-	0	0	-
I	11170226	A-G	+	antisense	F28D9.1;F28D9.4;Y52B11C.1	4	0	0	1	0	0	1	0	0	0	0	-	1	0	0	0	0	-	2	2	1	2	2	1	0	0	-	0	0	-
I	11170230	A-G	-	intron	F28D9.1;F28D9.4;Y52B11C.1	4	0	0	1	0	0	1	0	0	0	0	-	1	0	0	0	0	-	2	0	0	2	0	0	0	0	-	0	0	-
I	11170232	A-G	-	intron	F28D9.1;F28D9.4;Y52B11C.1	4	0	0	1	0	0	1	0	0	0	0	-	1	0	0	0	0	-	2	0	0	2	0	0	0	0	-	0	0	-
I	11170233	A-G	+	antisense	F28D9.1;F28D9.4;Y52B11C.1	4	1	0.25	1	1	1	1	0	0	0	0	-	1	1	1	0	0	-	2	0	0	2	2	1	0	0	-	0	0	-
I	11170234	A-G	+	antisense	F28D9.1;F28D9.4;Y52B11C.1	4	2	0.5	1	1	1	1	1	1	0	0	-	1	1	1	0	0	-	2	1	0.5	2	1	0.5	0	0	-	0	0	-
I	11170249	A-G	-	intron	F28D9.1;F28D9.4;Y52B11C.1	5	0	0	1	0	0	1	0	0	0	0	-	1	0	0	0	0	-	2	0	0	1	0	0	0	0	-	0	0	-
I	11170250	A-G	-	intron	F28D9.1;F28D9.4;Y52B11C.1	5	0	0	1	0	0	1	0	0	0	0	-	1	0	0	0	0	-	2	0	0	1	0	0	0	0	-	0	0	-
I	11170252	A-G	-	intron	F28D9.1;F28D9.4;Y52B11C.1	5	0	0	1	0	0	1	0	0	0	0	-	1	0	0	0	0	-	2	0	0	0	0	-	0	0	-	0	0	-
I	11170253	A-G	+	antisense	F28D9.1;F28D9.4;Y52B11C.1	5	2	0.4	1	1	1	1	0	0	0	0	-	1	0	0	0	0	-	2	2	1	0	0	-	0	0	-	0	0	-
I	11170264	A-G	-	intron	F28D9.1;F28D9.4;Y52B11C.1	2	0	0	1	0	0	0	0	-	0	0	-	0	0	-	0	0	-	1	0	0	2	0	0	0	0	-	0	0	-
I	11170271	A-G	-	intron	F28D9.1;F28D9.4;Y52B11C.1	3	0	0	0	0	-	0	0	-	0	0	-	0	0	-	0	0	-	2	0	0	2	0	0	0	0	-	0	0	-
I	11170276	A-G	-	intron	F28D9.1;F28D9.4;Y52B11C.1	3	0	0	0	0	-	0	0	-	0	0	-	0	0	-	0	0	-	2	0	0	2	0	0	0	0	-	0	0	-
I	11170277	A-G	-	intron	F28D9.1;F28D9.4;Y52B11C.1	3	0	0	0	0	-	0	0	-	0	0	-	0	0	-	0	0	-	2	0	0	2	0	0	0	0	-	0	0	-
I	11170283	A-G	-	intron	F28D9.1;F28D9.4;Y52B11C.1	3	0	0	0	0	-	0	0	-	0	0	-	0	0	-	0	0	-	2	0	0	2	0	0	0	0	-	0	0	-
I	11170285	A-G	+	antisense	F28D9.1;F28D9.4;Y52B11C.1	3	2	0.666667	0	0	-	0	0	-	0	0	-	0	0	-	0	0	-	2	2	1	2	2	1	0	0	-	0	0	-
I	11170287	A-G	+	antisense	F28D9.1;F28D9.4;Y52B11C.1	3	2	0.666667	0	0	-	0	0	-	0	0	-	0	0	-	0	0	-	2	1	0.5	2	2	1	0	0	-	0	0	-
I	11170288	A-G	+	antisense	F28D9.1;F28D9.4;Y52B11C.1	3	2	0.666667	0	0	-	0	0	-	0	0	-	0	0	-	0	0	-	2	2	1	2	2	1	0	0	-	0	0	-
I	11170312	A-G	+	antisense	F28D9.1;F28D9.4;Y52B11C.1	3	1	0.333333	0	0	-	0	0	-	0	0	-	0	0	-	0	0	-	2	1	0.5	2	1	0.5	0	0	-	0	0	-
I	11170313	A-G	+	antisense	F28D9.1;F28D9.4;Y52B11C.1	3	1	0.333333	0	0	-	0	0	-	0	0	-	0	0	-	0	0	-	2	1	0.5	2	2	1	0	0	-	0	0	-
I	11170334	A-G	+	antisense	F28D9.1;F28D9.4;Y52B11C.1	2	1	0.5	0	0	-	0	0	-	0	0	-	0	0	-	0	0	-	2	2	1	2	2	1	0	0	-	0	0	-
I	11170335	A-G	+	antisense	F28D9.1;F28D9.4;Y52B11C.1	2	2	1	0	0	-	0	0	-	0	0	-	0	0	-	0	0	-	2	2	1	2	2	1	0	0	-	0	0	-
I	11170340	A-G	+	antisense	F28D9.1;F28D9.4;Y52B11C.1	2	2	1	0	0	-	0	0	-	0	0	-	0	0	-	0	0	-	2	2	1	2	2	1	0	0	-	0	0	-
I	11170341	A-G	+	antisense	F28D9.1;F28D9.4;Y52B11C.1	2	2	1	0	0	-	0	0	-	0	0	-	0	0	-	0	0	-	2	2	1	2	2	1	0	0	-	0	0	-
I	11170362	A-G	+	antisense	F28D9.1;F28D9.4;Y52B11C.1	2	2	1	0	0	-	0	0	-	0	0	-	0	0	-	0	0	-	1	1	1	0	0	-	0	0	-	0	0	-
I	11170374	A-G	+	antisense	F28D9.1;F28D9.4;Y52B11C.1	2	2	1	0	0	-	0	0	-	0	0	-	0	0	-	0	0	-	0	0	-	0	0	-	0	0	-	0	0	-
I	11170375	A-G	+	antisense	F28D9.1;F28D9.4;Y52B11C.1	3	2	0.666667	0	0	-	0	0	-	0	0	-	0	0	-	0	0	-	0	0	-	0	0	-	0	0	-	0	0	-
I	11170384	A-G	+	antisense	F28D9.1;F28D9.4;Y52B11C.1	5	5	1	0	0	-	0	0	-	0	0	-	0	0	-	0	0	-	1	0	0	0	0	-	0	0	-	0	0	-
I	11170400	A-G	+	antisense	F28D9.1;F28D9.4;Y52B11C.1	5	2	0.4	0	0	-	0	0	-	0	0	-	0	0	-	1	1	1	1	0	0	0	0	-	0	0	-	0	0	-
I	11170409	A-G	+	antisense	F28D9.1;F28D9.4;Y52B11C.1	6	3	0.5	0	0	-	0	0	-	0	0	-	0	0	-	1	0	0	1	0	0	0	0	-	0	0	-	0	0	-
I	11170410	A-G	+	antisense	F28D9.1;F28D9.4;Y52B11C.1	6	6	1	0	0	-	0	0	-	0	0	-	0	0	-	1	0	0	1	1	1	0	0	-	0	0	-	0	0	-
I	11170429	A-G	+	antisense	F28D9.1;F28D9.4;Y52B11C.1	5	2	0.4	0	0	-	0	0	-	0	0	-	0	0	-	1	1	1	1	0	0	0	0	-	0	0	-	0	0	-
I	11170430	A-G	+	antisense	F28D9.1;F28D9.4;Y52B11C.1	5	5	1	0	0	-	0	0	-	0	0	-	0	0	-	1	1	1	1	1	1	0	0	-	0	0	-	0	0	-
I	11170435	A-G	+	antisense	F28D9.1;F28D9.4;Y52B11C.1	5	5	1	0	0	-	0	0	-	0	0	-	0	0	-	1	1	1	1	0	0	0	0	-	0	0	-	0	0	-
I	11170440	A-G	+	antisense	F28D9.1;F28D9.4;Y52B11C.1	5	5	1	0	0	-	0	0	-	0	0	-	0	0	-	1	1	1	1	1	1	0	0	-	0	0	-	0	0	-
I	11170442	A-G	+	antisense	F28D9.1;F28D9.4;Y52B11C.1	5	2	0.4	0	0	-	0	0	-	0	0	-	0	0	-	1	1	1	1	0	0	0	0	-	0	0	-	0	0	-
I	11170462	A-G	+	antisense	F28D9.1;F28D9.4;Y52B11C.1	6	3	0.5	0	0	-	0	0	-	0	0	-	0	0	-	1	1	1	1	0	0	0	0	-	0	0	-	0	0	-
I	11170469	A-G	+	antisense	F28D9.1;F28D9.4;Y52B11C.1	5	3	0.6	0	0	-	0	0	-	0	0	-	0	0	-	1	1	1	1	1	1	0	0	-	0	0	-	0	0	-
I	11170470	A-G	+	antisense	F28D9.1;F28D9.4;Y52B11C.1	5	1	0.2	0	0	-	0	0	-	0	0	-	0	0	-	1	1	1	1	1	1	0	0	-	0	0	-	0	0	-
I	11170473	A-G	+	antisense	F28D9.1;F28D9.4;Y52B11C.1	5	4	0.8	0	0	-	0	0	-	0	0	-	0	0	-	1	1	1	1	0	0	0	0	-	0	0	-	0	0	-
I	11170479	A-G	+	antisense	F28D9.1;F28D9.4;Y52B11C.1	5	1	0.2	0	0	-	0	0	-	0	0	-	0	0	-	2	2	1	0	0	-	0	0	-	0	0	-	0	0	-
I	11170482	A-G	+	antisense	F28D9.1;F28D9.4;Y52B11C.1	5	1	0.2	0	0	-	0	0	-	0	0	-	0	0	-	2	1	0.5	0	0	-	0	0	-	0	0	-	0	0	-
I	11170485	A-G	+	antisense	F28D9.1;F28D9.4;Y52B11C.1	5	2	0.4	0	0	-	0	0	-	0	0	-	0	0	-	2	1	0.5	0	0	-	0	0	-	0	0	-	0	0	-
I	11170489	A-G	+	antisense	F28D9.1;F28D9.4;Y52B11C.1	5	2	0.4	0	0	-	0	0	-	0	0	-	0	0	-	2	0	0	0	0	-	0	0	-	0	0	-	0	0	-
I	11170490	A-G	+	antisense	F28D9.1;F28D9.4;Y52B11C.1	5	4	0.8	0	0	-	0	0	-	0	0	-	0	0	-	2	2	1	0	0	-	0	0	-	0	0	-	0	0	-
I	11172034	A-G	-	intron	F28D9.1;F28D9.4;Y52B11C.1	0	0	-	0	0	-	0	0	-	0	0	-	0	0	-	0	0	-	0	0	-	1	0	0	0	0	-	0	0	-
I	11172055	A-G	-	intron	F28D9.1;F28D9.4;Y52B11C.1	0	0	-	0	0	-	0	0	-	0	0	-	0	0	-	0	0	-	0	0	-	1	0	0	0	0	-	0	0	-
I	11172064	A-G	-	intron	F28D9.1;F28D9.4;Y52B11C.1	0	0	-	0	0	-	0	0	-	0	0	-	0	0	-	0	0	-	0	0	-	1	0	0	0	0	-	0	0	-
I	11172065	A-G	-	intron	F28D9.1;F28D9.4;Y52B11C.1	0	0	-	0	0	-	0	0	-	0	0	-	0	0	-	0	0	-	0	0	-	1	0	0	0	0	-	0	0	-
I	11172066	A-G	-	intron	F28D9.1;F28D9.4;Y52B11C.1	0	0	-	0	0	-	0	0	-	0	0	-	0	0	-	0	0	-	0	0	-	1	0	0	0	0	-	0	0	-
I	11172067	A-G	-	intron	F28D9.1;F28D9.4;Y52B11C.1	0	0	-	0	0	-	0	0	-	0	0	-	0	0	-	0	0	-	0	0	-	0	0	-	0	0	-	0	0	-
I	11172072	A-G	-	intron	F28D9.1;F28D9.4;Y52B11C.1	0	0	-	0	0	-	0	0	-	0	0	-	0	0	-	0	0	-	0	0	-	1	0	0	0	0	-	0	0	-
I	11172080	A-G	-	intron	F28D9.1;F28D9.4;Y52B11C.1	0	0	-	0	0	-	0	0	-	0	0	-	0	0	-	0	0	-	0	0	-	0	0	-	0	0	-	0	0	-
I	11172086	A-G	-	intron	F28D9.1;F28D9.4;Y52B11C.1	0	0	-	0	0	-	0	0	-	0	0	-	0	0	-	0	0	-	0	0	-	0	0	-	0	0	-	0	0	-
I	11172093	A-G	-	intron	F28D9.1;F28D9.4;Y52B11C.1	2	0	0	0	0	-	0	0	-	0	0	-	0	0	-	0	0	-	0	0	-	0	0	-	0	0	-	0	0	-
I	11172094	A-G	-	intron	F28D9.1;F28D9.4;Y52B11C.1	2	0	0	0	0	-	0	0	-	0	0	-	0	0	-	0	0	-	0	0	-	0	0	-	0	0	-	0	0	-
I	11172095	A-G	-	intron	F28D9.1;F28D9.4;Y52B11C.1	2	0	0	0	0	-	0	0	-	0	0	-	0	0	-	0	0	-	0	0	-	0	0	-	0	0	-	0	0	-
I	11172108	A-G	-	intron	F28D9.1;F28D9.4;Y52B11C.1	2	0	0	0	0	-	0	0	-	0	0	-	0	0	-	0	0	-	0	0	-	0	0	-	0	0	-	0	0	-
I	11172109	A-G	-	intron	F28D9.1;F28D9.4;Y52B11C.1	3	0	0	0	0	-	0	0	-	0	0	-	0	0	-	0	0	-	0	0	-	0	0	-	0	0	-	0	0	-
I	11172122	A-G	-	intron	F28D9.1;F28D9.4;Y52B11C.1	5	0	0	1	0	0	0	0	-	0	0	-	0	0	-	0	0	-	0	0	-	1	0	0	1	0	0	0	0	-
I	11172123	A-G	-	intron	F28D9.1;F28D9.4;Y52B11C.1	5	0	0	1	0	0	0	0	-	0	0	-	0	0	-	0	0	-	0	0	-	1	0	0	1	0	0	0	0	-
I	11172124	A-G	-	intron	F28D9.1;F28D9.4;Y52B11C.1	5	0	0	1	0	0	0	0	-	0	0	-	0	0	-	0	0	-	0	0	-	0	0	-	1	0	0	0	0	-
I	11172125	A-G	-	intron	F28D9.1;F28D9.4;Y52B11C.1	5	0	0	1	0	0	0	0	-	0	0	-	0	0	-	0	0	-	0	0	-	0	0	-	1	0	0	0	0	-
I	11172126	A-G	-	intron	F28D9.1;F28D9.4;Y52B11C.1	5	0	0	1	0	0	0	0	-	0	0	-	0	0	-	0	0	-	0	0	-	1	0	0	1	0	0	0	0	-
I	11172137	A-G	+	antisense	F28D9.1;F28D9.4;Y52B11C.1	6	4	0.666667	1	0	0	0	0	-	0	0	-	0	0	-	0	0	-	0	0	-	1	1	1	1	0	0	0	0	-
I	11172142	A-G	+	antisense	F28D9.1;F28D9.4;Y52B11C.1	5	2	0.4	2	2	1	0	0	-	0	0	-	0	0	-	0	0	-	4	0	0	1	0	0	1	0	0	0	0	-
I	11172143	A-G	-	intron	F28D9.1;F28D9.4;Y52B11C.1	6	0	0	2	0	0	0	0	-	0	0	-	0	0	-	0	0	-	4	0	0	1	0	0	1	0	0	0	0	-
I	11172148	A-G	-	intron	F28D9.1;F28D9.4;Y52B11C.1	6	0	0	2	0	0	0	0	-	0	0	-	0	0	-	0	0	-	4	0	0	2	0	0	1	0	0	0	0	-
I	11172149	A-G	-	intron	F28D9.1;F28D9.4;Y52B11C.1	7	0	0	2	0	0	0	0	-	0	0	-	0	0	-	0	0	-	4	0	0	3	0	0	1	0	0	0	0	-
I	11172150	A-G	+	antisense	F28D9.1;F28D9.4;Y52B11C.1	7	6	0.857143	2	2	1	0	0	-	0	0	-	0	0	-	0	0	-	4	4	1	3	2	0.666667	1	0	0	0	0	-
I	11172156	A-G	-	intron	F28D9.1;F28D9.4;Y52B11C.1	7	0	0	2	0	0	0	0	-	0	0	-	0	0	-	0	0	-	4	0	0	4	0	0	1	0	0	0	0	-
I	11172157	A-G	-	intron	F28D9.1;F28D9.4;Y52B11C.1	7	0	0	2	0	0	0	0	-	0	0	-	0	0	-	0	0	-	4	0	0	4	0	0	1	0	0	0	0	-
I	11172159	A-G	-	intron	F28D9.1;F28D9.4;Y52B11C.1	8	0	0	2	0	0	0	0	-	0	0	-	0	0	-	0	0	-	4	0	0	4	0	0	1	0	0	0	0	-
I	11172162	A-G	-	intron	F28D9.1;F28D9.4;Y52B11C.1	7	0	0	3	0	0	0	0	-	0	0	-	0	0	-	0	0	-	4	0	0	4	0	0	1	0	0	0	0	-
I	11172163	A-G	+	antisense	F28D9.1;F28D9.4;Y52B11C.1	8	8	1	3	3	1	0	0	-	0	0	-	0	0	-	1	1	1	5	5	1	4	4	1	1	1	1	0	0	-
I	11172164	A-G	+	antisense	F28D9.1;F28D9.4;Y52B11C.1	8	6	0.75	3	2	0.666667	0	0	-	0	0	-	0	0	-	1	0	0	5	3	0.6	4	1	0.25	1	0	0	0	0	-
I	11172166	A-G	+	antisense	F28D9.1;F28D9.4;Y52B11C.1	8	4	0.5	3	1	0.333333	0	0	-	0	0	-	0	0	-	1	0	0	5	1	0.2	4	3	0.75	1	0	0	0	0	-
I	11172167	A-G	+	antisense	F28D9.1;F28D9.4;Y52B11C.1	8	0	0	3	0	0	0	0	-	0	0	-	0	0	-	1	0	0	5	0	0	4	2	0.5	1	0	0	0	0	-
I	11172173	A-G	+	antisense	F28D9.1;F28D9.4;Y52B11C.1	7	4	0.571429	3	2	0.666667	0	0	-	0	0	-	0	0	-	1	1	1	6	2	0.333333	4	3	0.75	1	0	0	0	0	-
I	11172175	A-G	+	antisense	F28D9.1;F28D9.4;Y52B11C.1	7	3	0.428571	3	2	0.666667	0	0	-	0	0	-	0	0	-	1	1	1	6	0	0	4	1	0.25	1	0	0	0	0	-
I	11172176	A-G	+	antisense	F28D9.1;F28D9.4;Y52B11C.1	7	3	0.428571	3	3	1	0	0	-	0	0	-	0	0	-	1	0	0	6	2	0.333333	4	3	0.75	1	0	0	0	0	-
I	11172184	A-G	+	antisense	F28D9.1;F28D9.4;Y52B11C.1	9	5	0.555556	3	2	0.666667	0	0	-	0	0	-	0	0	-	1	1	1	6	1	0.166667	4	1	0.25	1	0	0	0	0	-
I	11172185	A-G	+	antisense	F28D9.1;F28D9.4;Y52B11C.1	9	6	0.666667	3	1	0.333333	0	0	-	0	0	-	0	0	-	1	0	0	6	2	0.333333	4	3	0.75	1	0	0	0	0	-
I	11172186	A-G	+	antisense	F28D9.1;F28D9.4;Y52B11C.1	9	2	0.222222	3	0	0	0	0	-	0	0	-	0	0	-	1	0	0	6	0	0	4	1	0.25	1	0	0	0	0	-
I	11172187	A-G	-	intron	F28D9.1;F28D9.4;Y52B11C.1	8	0	0	3	0	0	0	0	-	0	0	-	0	0	-	1	0	0	6	0	0	4	0	0	1	0	0	0	0	-
I	11172189	A-G	+	antisense	F28D9.1;F28D9.4;Y52B11C.1	9	3	0.333333	3	1	0.333333	0	0	-	0	0	-	0	0	-	1	0	0	6	1	0.166667	4	2	0.5	1	0	0	0	0	-
I	11172194	A-G	+	antisense	F28D9.1;F28D9.4;Y52B11C.1	9	0	0	3	0	0	0	0	-	0	0	-	0	0	-	1	0	0	6	2	0.333333	4	0	0	1	0	0	0	0	-
I	11172197	A-G	-	intron	F28D9.1;F28D9.4;Y52B11C.1	9	0	0	3	0	0	0	0	-	0	0	-	0	0	-	1	0	0	6	0	0	4	0	0	1	0	0	0	0	-
I	11172210	A-G	+	antisense	F28D9.1;F28D9.4;Y52B11C.1	9	6	0.666667	3	2	0.666667	0	0	-	0	0	-	0	0	-	1	1	1	6	3	0.5	3	3	1	1	0	0	0	0	-
I	11172212	A-G	+	antisense	F28D9.1;F28D9.4;Y52B11C.1	9	4	0.444444	3	1	0.333333	0	0	-	0	0	-	0	0	-	1	0	0	6	1	0.166667	3	0	0	1	0	0	0	0	-
I	11172215	A-G	+	antisense	F28D9.1;F28D9.4;Y52B11C.1	10	1	0.1	3	1	0.333333	0	0	-	0	0	-	0	0	-	1	0	0	6	0	0	3	2	0.666667	1	0	0	0	0	-
I	11172217	A-G	-	intron	F28D9.1;F28D9.4;Y52B11C.1	9	0	0	2	0	0	0	0	-	0	0	-	0	0	-	1	0	0	6	0	0	3	0	0	1	0	0	0	0	-
I	11173736	A-G	-	intron	F28D9.1;F28D9.4;Y52B11C.1	0	0	-	0	0	-	0	0	-	0	0	-	0	0	-	0	0	-	0	0	-	0	0	-	0	0	-	0	0	-
I	11173744	A-G	-	intron	F28D9.1;F28D9.4;Y52B11C.1	0	0	-	0	0	-	0	0	-	0	0	-	0	0	-	0	0	-	0	0	-	0	0	-	0	0	-	0	0	-
I	11173752	A-G	-	intron	F28D9.1;F28D9.4;Y52B11C.1	0	0	-	0	0	-	0	0	-	0	0	-	0	0	-	0	0	-	0	0	-	0	0	-	0	0	-	0	0	-
I	11173775	A-G	-	intron	F28D9.1;F28D9.4;Y52B11C.1	0	0	-	0	0	-	0	0	-	0	0	-	0	0	-	0	0	-	0	0	-	0	0	-	0	0	-	0	0	-
I	11173787	A-G	-	intron	F28D9.1;F28D9.4;Y52B11C.1	0	0	-	0	0	-	0	0	-	0	0	-	0	0	-	0	0	-	0	0	-	0	0	-	0	0	-	0	0	-
I	11173789	A-G	-	intron	F28D9.1;F28D9.4;Y52B11C.1	0	0	-	0	0	-	0	0	-	0	0	-	0	0	-	0	0	-	0	0	-	0	0	-	0	0	-	0	0	-
I	11173799	A-G	-	intron	F28D9.1;F28D9.4;Y52B11C.1	0	0	-	0	0	-	0	0	-	0	0	-	0	0	-	0	0	-	0	0	-	0	0	-	0	0	-	0	0	-
I	11173839	A-G	-	intron	F28D9.1;F28D9.4;Y52B11C.1	0	0	-	0	0	-	0	0	-	0	0	-	0	0	-	0	0	-	0	0	-	0	0	-	0	0	-	0	0	-
I	11173855	A-G	-	intron	F28D9.1;F28D9.4;Y52B11C.1	0	0	-	0	0	-	0	0	-	0	0	-	0	0	-	0	0	-	0	0	-	0	0	-	0	0	-	0	0	-
I	11173872	A-G	-	intron	F28D9.1;F28D9.4;Y52B11C.1	0	0	-	0	0	-	0	0	-	0	0	-	0	0	-	0	0	-	0	0	-	0	0	-	0	0	-	0	0	-
I	11173879	A-G	-	intron	F28D9.1;F28D9.4;Y52B11C.1	0	0	-	0	0	-	0	0	-	0	0	-	0	0	-	0	0	-	0	0	-	0	0	-	0	0	-	0	0	-
I	11173894	A-G	-	intron	F28D9.1;F28D9.4;Y52B11C.1	0	0	-	0	0	-	0	0	-	0	0	-	0	0	-	0	0	-	0	0	-	0	0	-	0	0	-	0	0	-
I	11173903	A-G	-	intron	F28D9.1;F28D9.4;Y52B11C.1	0	0	-	0	0	-	0	0	-	0	0	-	0	0	-	0	0	-	0	0	-	0	0	-	0	0	-	0	0	-
I	11173913	A-G	-	intron	F28D9.1;F28D9.4;Y52B11C.1	0	0	-	0	0	-	0	0	-	0	0	-	0	0	-	0	0	-	0	0	-	0	0	-	0	0	-	0	0	-
I	11173924	A-G	-	intron	F28D9.1;F28D9.4;Y52B11C.1	0	0	-	0	0	-	0	0	-	0	0	-	0	0	-	0	0	-	0	0	-	0	0	-	0	0	-	0	0	-
I	11173926	A-G	-	intron	F28D9.1;F28D9.4;Y52B11C.1	0	0	-	0	0	-	0	0	-	0	0	-	0	0	-	0	0	-	0	0	-	0	0	-	0	0	-	0	0	-
I	11173965	A-G	-	intron	F28D9.1;F28D9.4;Y52B11C.1	0	0	-	0	0	-	0	0	-	0	0	-	0	0	-	0	0	-	0	0	-	0	0	-	0	0	-	0	0	-
I	11173967	A-G	-	intron	F28D9.1;F28D9.4;Y52B11C.1	0	0	-	0	0	-	0	0	-	0	0	-	0	0	-	0	0	-	0	0	-	0	0	-	0	0	-	0	0	-
I	11173970	A-G	-	intron	F28D9.1;F28D9.4;Y52B11C.1	0	0	-	0	0	-	0	0	-	0	0	-	0	0	-	0	0	-	0	0	-	0	0	-	0	0	-	0	0	-
I	11173978	A-G	-	intron	F28D9.1;F28D9.4;Y52B11C.1	0	0	-	0	0	-	0	0	-	0	0	-	0	0	-	0	0	-	0	0	-	0	0	-	0	0	-	0	0	-
I	11173979	A-G	-	intron	F28D9.1;F28D9.4;Y52B11C.1	0	0	-	0	0	-	0	0	-	0	0	-	0	0	-	0	0	-	0	0	-	0	0	-	0	0	-	0	0	-
I	11173986	A-G	-	intron	F28D9.1;F28D9.4;Y52B11C.1	0	0	-	0	0	-	0	0	-	0	0	-	0	0	-	0	0	-	0	0	-	0	0	-	0	0	-	0	0	-
I	11173989	A-G	-	intron	F28D9.1;F28D9.4;Y52B11C.1	0	0	-	0	0	-	0	0	-	0	0	-	0	0	-	0	0	-	0	0	-	0	0	-	0	0	-	0	0	-
I	11173990	A-G	-	intron	F28D9.1;F28D9.4;Y52B11C.1	0	0	-	0	0	-	0	0	-	0	0	-	0	0	-	0	0	-	0	0	-	0	0	-	0	0	-	0	0	-
I	11173991	A-G	-	intron	F28D9.1;F28D9.4;Y52B11C.1	0	0	-	0	0	-	0	0	-	0	0	-	0	0	-	0	0	-	0	0	-	0	0	-	0	0	-	0	0	-
I	11174000	A-G	-	intron	F28D9.1;F28D9.4;Y52B11C.1	0	0	-	0	0	-	0	0	-	0	0	-	0	0	-	0	0	-	0	0	-	0	0	-	0	0	-	0	0	-
I	11174061	A-G	-	intron	F28D9.1;F28D9.4;Y52B11C.1	0	0	-	0	0	-	0	0	-	0	0	-	0	0	-	0	0	-	0	0	-	0	0	-	0	0	-	0	0	-
I	11174081	A-G	-	intron	F28D9.1;F28D9.4;Y52B11C.1	0	0	-	0	0	-	0	0	-	0	0	-	0	0	-	0	0	-	0	0	-	0	0	-	0	0	-	0	0	-
I	11174099	A-G	-	intron	F28D9.1;F28D9.4;Y52B11C.1	0	0	-	0	0	-	0	0	-	0	0	-	0	0	-	0	0	-	0	0	-	0	0	-	0	0	-	0	0	-
I	11174207	A-G	-	intron	F28D9.1;F28D9.4;Y52B11C.1	0	0	-	0	0	-	0	0	-	0	0	-	0	0	-	0	0	-	0	0	-	0	0	-	0	0	-	0	0	-
I	11174208	A-G	-	intron	F28D9.1;F28D9.4;Y52B11C.1	0	0	-	0	0	-	0	0	-	0	0	-	0	0	-	0	0	-	0	0	-	0	0	-	0	0	-	0	0	-
I	11215409	A-G	+	downstream	null	1	1	1	1	1	1	0	0	-	0	0	-	0	0	-	0	0	-	1	0	0	0	0	-	0	0	-	0	0	-
I	11215441	A-G	+	downstream	null	1	1	1	1	1	1	0	0	-	0	0	-	0	0	-	0	0	-	0	0	-	0	0	-	0	0	-	0	0	-
I	11224299	A-G	+	downstream	Y53H1A.2	1	0	0	7	2	0.285714	2	0	0	5	0	0	5	0	0	8	1	0.125	4	0	0	2	0	0	1	0	0	0	0	-
I	11224304	A-G	+	downstream	Y53H1A.2	1	0	0	7	3	0.428571	2	0	0	5	0	0	5	0	0	8	2	0.25	4	0	0	2	0	0	1	0	0	0	0	-
I	11224742	A-G	+	upstream	Y53H1A.5	4	0	0	0	0	-	4	1	0.25	1	0	0	0	0	-	3	1	0.333333	11	2	0.181818	4	2	0.5	0	0	-	0	0	-
I	11224743	A-G	+	upstream	Y53H1A.5	4	2	0.5	0	0	-	4	0	0	1	0	0	0	0	-	3	0	0	11	0	0	3	0	0	0	0	-	0	0	-
I	11224753	A-G	+	upstream	Y53H1A.5	3	0	0	0	0	-	4	0	0	0	0	-	0	0	-	3	0	0	9	1	0.111111	4	1	0.25	0	0	-	0	0	-
I	11224761	A-G	+	upstream	Y53H1A.5	4	2	0.5	0	0	-	4	1	0.25	1	0	0	0	0	-	3	1	0.333333	11	4	0.363636	5	2	0.4	0	0	-	0	0	-
I	11226076	A-G	+	intron	Y53H1A.5	2	0	0	0	0	-	0	0	-	0	0	-	0	0	-	3	0	0	5	1	0.2	3	1	0.333333	1	0	0	2	0	0
I	11226082	A-G	+	intron	Y53H1A.5	2	0	0	0	0	-	0	0	-	0	0	-	0	0	-	3	2	0.666667	5	0	0	3	1	0.333333	1	0	0	2	2	1
I	11226819	A-G	+	intron	Y53H1A.5	0	0	-	0	0	-	0	0	-	0	0	-	1	1	1	0	0	-	2	2	1	1	1	1	0	0	-	1	1	1
I	11226829	A-G	+	intron	Y53H1A.5	1	1	1	0	0	-	0	0	-	0	0	-	1	1	1	0	0	-	3	1	0.333333	1	1	1	0	0	-	1	1	1
I	11226838	A-G	+	intron	Y53H1A.5	1	1	1	0	0	-	0	0	-	0	0	-	1	0	0	1	1	1	3	0	0	1	1	1	0	0	-	1	0	0
I	11226897	A-G	+	intron	Y53H1A.5	1	1	1	0	0	-	0	0	-	0	0	-	1	1	1	1	1	1	3	1	0.333333	1	1	1	0	0	-	1	0	0
I	11226898	A-G	+	intron	Y53H1A.5	1	1	1	0	0	-	0	0	-	0	0	-	1	1	1	1	1	1	3	2	0.666667	1	1	1	0	0	-	1	1	1
I	11226900	A-G	+	intron	Y53H1A.5	1	1	1	0	0	-	0	0	-	0	0	-	1	0	0	1	0	0	3	2	0.666667	1	0	0	0	0	-	1	0	0
I	11226911	A-G	+	intron	Y53H1A.5	1	1	1	0	0	-	0	0	-	0	0	-	1	1	1	1	1	1	3	2	0.666667	0	0	-	0	0	-	1	1	1
I	11227604	A-G	+	intron	Y53H1A.5	2	0	0	0	0	-	2	2	1	0	0	-	0	0	-	3	0	0	0	0	-	0	0	-	0	0	-	0	0	-
I	11227631	A-G	+	intron	Y53H1A.5	2	0	0	0	0	-	2	2	1	0	0	-	0	0	-	3	0	0	0	0	-	0	0	-	0	0	-	0	0	-
I	11227638	A-G	+	intron	Y53H1A.5	2	0	0	0	0	-	2	2	1	0	0	-	0	0	-	3	0	0	0	0	-	0	0	-	0	0	-	0	0	-
I	11227681	A-G	+	intron	Y53H1A.5	2	0	0	0	0	-	2	2	1	0	0	-	0	0	-	3	0	0	0	0	-	0	0	-	0	0	-	0	0	-
I	11227692	A-G	+	intron	Y53H1A.5	2	1	0.5	0	0	-	2	2	1	0	0	-	0	0	-	3	1	0.333333	0	0	-	0	0	-	0	0	-	0	0	-
I	11227693	A-G	+	intron	Y53H1A.5	2	2	1	0	0	-	2	2	1	0	0	-	0	0	-	3	1	0.333333	0	0	-	0	0	-	0	0	-	0	0	-
I	11227699	A-G	+	intron	Y53H1A.5	2	0	0	0	0	-	2	1	0.5	0	0	-	0	0	-	3	1	0.333333	0	0	-	0	0	-	0	0	-	0	0	-
I	11227703	A-G	+	intron	Y53H1A.5	2	2	1	0	0	-	1	1	1	0	0	-	0	0	-	3	1	0.333333	0	0	-	0	0	-	0	0	-	0	0	-
I	11227704	A-G	+	intron	Y53H1A.5	2	2	1	0	0	-	1	1	1	0	0	-	0	0	-	3	1	0.333333	0	0	-	0	0	-	0	0	-	0	0	-
I	11227707	A-G	+	intron	Y53H1A.5	2	1	0.5	0	0	-	1	1	1	0	0	-	0	0	-	3	0	0	0	0	-	0	0	-	0	0	-	0	0	-
I	11227708	A-G	+	intron	Y53H1A.5	2	0	0	0	0	-	1	1	1	0	0	-	0	0	-	3	1	0.333333	0	0	-	0	0	-	0	0	-	0	0	-
I	11227825	A-G	+	intron	Y53H1A.5	0	0	-	0	0	-	0	0	-	1	1	1	0	0	-	1	1	1	0	0	-	1	1	1	0	0	-	0	0	-
I	11227845	A-G	+	intron	Y53H1A.5	0	0	-	0	0	-	0	0	-	1	1	1	0	0	-	1	1	1	0	0	-	1	1	1	0	0	-	0	0	-
I	11227905	A-G	+	intron	Y53H1A.5	4	4	1	0	0	-	0	0	-	1	1	1	3	3	1	1	1	1	1	1	1	0	0	-	1	1	1	1	1	1
I	11227914	A-G	+	intron	Y53H1A.5	5	0	0	1	0	0	0	0	-	1	0	0	3	0	0	1	0	0	1	1	1	1	1	1	1	1	1	1	0	0
I	11227915	A-G	+	intron	Y53H1A.5	5	1	0.2	1	0	0	0	0	-	1	0	0	3	0	0	1	0	0	1	1	1	1	1	1	1	0	0	1	0	0
I	11227919	A-G	+	intron	Y53H1A.5	5	1	0.2	1	1	1	0	0	-	1	0	0	3	1	0.333333	1	1	1	1	0	0	1	0	0	1	0	0	1	0	0
I	11227920	A-G	+	intron	Y53H1A.5	5	3	0.6	1	1	1	0	0	-	1	1	1	3	1	0.333333	1	1	1	1	1	1	1	1	1	1	1	1	1	0	0
I	11227924	A-G	+	intron	Y53H1A.5	5	3	0.6	1	0	0	1	1	1	1	0	0	3	1	0.333333	1	1	1	1	0	0	1	0	0	1	0	0	1	1	1
I	11227926	A-G	+	intron	Y53H1A.5	6	0	0	2	1	0.5	1	0	0	1	0	0	3	0	0	2	0	0	1	0	0	1	1	1	1	1	1	1	0	0
I	11227937	A-G	+	intron	Y53H1A.5	7	7	1	2	2	1	1	1	1	1	1	1	4	4	1	3	3	1	2	2	1	2	2	1	1	1	1	1	1	1
I	11227938	A-G	+	intron	Y53H1A.5	7	5	0.714286	2	1	0.5	1	0	0	1	1	1	4	2	0.5	3	3	1	2	0	0	2	1	0.5	1	1	1	1	1	1
I	11227940	A-G	+	intron	Y53H1A.5	7	4	0.571429	2	1	0.5	1	1	1	1	0	0	4	4	1	3	1	0.333333	2	1	0.5	2	0	0	1	0	0	1	1	1
I	11227941	A-G	+	intron	Y53H1A.5	7	1	0.142857	2	1	0.5	1	1	1	1	0	0	4	1	0.25	3	0	0	2	0	0	1	0	0	1	0	0	1	0	0
I	11227948	A-G	+	intron	Y53H1A.5	7	2	0.285714	2	2	1	1	0	0	1	0	0	4	0	0	3	1	0.333333	2	0	0	3	1	0.333333	1	0	0	1	0	0
I	11227950	A-G	+	intron	Y53H1A.5	7	2	0.285714	2	0	0	1	1	1	1	1	1	4	0	0	3	0	0	2	0	0	3	2	0.666667	1	1	1	1	0	0
I	11227954	A-G	+	intron	Y53H1A.5	7	2	0.285714	2	0	0	1	0	0	1	0	0	4	0	0	3	0	0	2	1	0.5	3	0	0	1	0	0	1	0	0
I	11227956	A-G	+	intron	Y53H1A.5	7	4	0.571429	2	1	0.5	1	1	1	1	1	1	4	3	0.75	3	3	1	2	0	0	3	3	1	0	0	-	1	1	1
I	11227957	A-G	+	intron	Y53H1A.5	7	5	0.714286	2	2	1	1	1	1	1	1	1	4	4	1	3	3	1	2	2	1	3	3	1	0	0	-	1	1	1
I	11227958	A-G	+	intron	Y53H1A.5	5	1	0.2	2	0	0	1	0	0	1	0	0	4	1	0.25	3	0	0	2	1	0.5	3	0	0	0	0	-	1	0	0
I	11227959	A-G	+	intron	Y53H1A.5	7	1	0.142857	2	1	0.5	1	1	1	1	0	0	4	1	0.25	3	0	0	2	1	0.5	3	1	0.333333	0	0	-	1	0	0
I	11227961	A-G	+	intron	Y53H1A.5	6	2	0.333333	2	0	0	1	0	0	1	0	0	4	1	0.25	3	1	0.333333	2	0	0	3	2	0.666667	0	0	-	1	1	1
I	11227965	A-G	+	intron	Y53H1A.5	7	3	0.428571	2	0	0	1	1	1	1	0	0	4	0	0	3	2	0.666667	2	0	0	3	2	0.666667	0	0	-	1	0	0
I	11227968	A-G	+	intron	Y53H1A.5	7	3	0.428571	2	0	0	1	0	0	1	0	0	4	4	1	3	2	0.666667	2	0	0	3	1	0.333333	0	0	-	1	1	1
I	11227969	A-G	+	intron	Y53H1A.5	7	1	0.142857	2	0	0	1	0	0	1	0	0	4	2	0.5	3	0	0	2	0	0	3	1	0.333333	0	0	-	1	0	0
I	11227971	A-G	+	intron	Y53H1A.5	7	1	0.142857	2	1	0.5	1	1	1	1	0	0	4	0	0	3	0	0	2	1	0.5	3	0	0	0	0	-	1	1	1
I	11227972	A-G	+	intron	Y53H1A.5	7	5	0.714286	2	2	1	1	1	1	1	0	0	4	2	0.5	3	2	0.666667	2	1	0.5	3	2	0.666667	0	0	-	1	1	1
I	11227973	A-G	+	intron	Y53H1A.5	7	2	0.285714	2	1	0.5	1	1	1	1	0	0	4	1	0.25	3	0	0	2	0	0	3	0	0	0	0	-	1	0	0
I	11227975	A-G	+	intron	Y53H1A.5	5	1	0.2	2	1	0.5	1	0	0	1	0	0	3	1	0.333333	3	0	0	2	0	0	3	1	0.333333	0	0	-	1	1	1
I	11227976	A-G	+	intron	Y53H1A.5	7	2	0.285714	2	1	0.5	1	1	1	1	1	1	3	0	0	3	1	0.333333	2	2	1	3	1	0.333333	1	0	0	1	1	1
I	11227977	A-G	+	intron	Y53H1A.5	7	0	0	2	1	0.5	1	1	1	1	1	1	4	0	0	3	0	0	2	0	0	3	0	0	1	0	0	1	1	1
I	11227978	A-G	+	intron	Y53H1A.5	7	2	0.285714	2	0	0	1	0	0	1	0	0	4	0	0	3	0	0	2	0	0	3	0	0	1	0	0	1	0	0
I	11227982	A-G	+	intron	Y53H1A.5	6	6	1	2	2	1	1	1	1	1	1	1	4	4	1	3	3	1	2	2	1	3	3	1	1	1	1	1	1	1
I	11227991	A-G	+	intron	Y53H1A.5	4	1	0.25	2	1	0.5	1	0	0	0	0	-	4	1	0.25	3	1	0.333333	2	0	0	4	0	0	1	1	1	1	0	0
I	11227998	A-G	+	intron	Y53H1A.5	5	4	0.8	2	2	1	1	1	1	0	0	-	4	1	0.25	3	0	0	2	2	1	3	2	0.666667	1	1	1	1	1	1
I	11227999	A-G	+	intron	Y53H1A.5	5	2	0.4	2	1	0.5	1	1	1	0	0	-	4	1	0.25	3	3	1	2	1	0.5	3	2	0.666667	1	1	1	1	1	1
I	11228001	A-G	+	intron	Y53H1A.5	5	1	0.2	2	0	0	1	0	0	0	0	-	3	1	0.333333	3	0	0	2	0	0	3	0	0	1	0	0	1	0	0
I	11228005	A-G	+	intron	Y53H1A.5	5	0	0	2	0	0	1	1	1	0	0	-	4	1	0.25	2	0	0	1	1	1	3	0	0	1	0	0	1	0	0
I	11228007	A-G	+	intron	Y53H1A.5	5	3	0.6	2	1	0.5	1	1	1	0	0	-	4	3	0.75	2	2	1	1	0	0	3	1	0.333333	1	0	0	1	1	1
I	11228008	A-G	+	intron	Y53H1A.5	5	5	1	2	2	1	1	1	1	0	0	-	4	4	1	2	2	1	1	0	0	3	3	1	1	1	1	1	1	1
I	11228014	A-G	+	intron	Y53H1A.5	5	1	0.2	2	1	0.5	2	0	0	0	0	-	4	0	0	2	0	0	1	0	0	3	0	0	1	0	0	1	1	1
I	11228015	A-G	+	intron	Y53H1A.5	5	0	0	2	0	0	2	0	0	0	0	-	4	2	0.5	2	0	0	1	0	0	3	0	0	1	0	0	1	0	0
I	11228016	A-G	+	intron	Y53H1A.5	4	0	0	2	0	0	2	1	0.5	0	0	-	4	1	0.25	2	0	0	1	0	0	3	0	0	1	0	0	1	0	0
I	11228017	A-G	+	intron	Y53H1A.5	4	2	0.5	2	0	0	2	1	0.5	0	0	-	4	3	0.75	2	0	0	1	1	1	3	2	0.666667	1	0	0	1	1	1
I	11228018	A-G	+	intron	Y53H1A.5	5	1	0.2	2	0	0	2	0	0	0	0	-	4	1	0.25	2	1	0.5	1	0	0	3	1	0.333333	1	0	0	1	0	0
I	11228025	A-G	+	intron	Y53H1A.5	6	3	0.5	1	1	1	2	1	0.5	0	0	-	4	2	0.5	2	1	0.5	2	0	0	2	1	0.5	1	0	0	1	1	1
I	11228030	A-G	+	intron	Y53H1A.5	6	5	0.833333	2	1	0.5	2	2	1	0	0	-	4	3	0.75	2	1	0.5	2	2	1	2	2	1	1	1	1	1	0	0
I	11228035	A-G	+	intron	Y53H1A.5	6	4	0.666667	2	2	1	2	2	1	0	0	-	4	4	1	2	2	1	2	2	1	3	3	1	1	1	1	1	1	1
I	11228040	A-G	+	intron	Y53H1A.5	6	0	0	2	0	0	2	2	1	0	0	-	5	0	0	2	0	0	2	0	0	2	0	0	1	0	0	1	0	0
I	11228052	A-G	+	intron	Y53H1A.5	7	5	0.714286	2	2	1	2	2	1	0	0	-	5	4	0.8	3	2	0.666667	2	2	1	3	3	1	1	1	1	2	2	1
I	11228062	A-G	+	intron	Y53H1A.5	8	1	0.125	2	0	0	2	0	0	0	0	-	5	1	0.2	3	0	0	2	0	0	3	0	0	1	0	0	2	0	0
I	11228231	A-G	+	intron	Y53H1A.5	3	0	0	2	0	0	0	0	-	0	0	-	1	0	0	4	0	0	0	0	-	8	1	0.125	0	0	-	3	1	0.333333
I	11228237	A-G	+	intron	Y53H1A.5	4	0	0	2	0	0	0	0	-	0	0	-	1	0	0	6	0	0	0	0	-	9	1	0.111111	0	0	-	3	1	0.333333
I	11228251	A-G	+	intron	Y53H1A.5	4	0	0	2	0	0	0	0	-	0	0	-	1	0	0	8	1	0.125	0	0	-	8	1	0.125	0	0	-	3	1	0.333333
I	11228289	A-G	+	intron	Y53H1A.5	3	0	0	1	0	0	0	0	-	0	0	-	0	0	-	6	0	0	0	0	-	8	1	0.125	0	0	-	2	1	0.5
I	11231538	A-G	+	intron	Y53H1A.5	2	0	0	3	1	0.333333	1	1	1	0	0	-	0	0	-	0	0	-	2	1	0.5	5	3	0.6	0	0	-	0	0	-
I	11231543	A-G	+	intron	Y53H1A.5	3	0	0	3	1	0.333333	1	1	1	0	0	-	0	0	-	0	0	-	2	0	0	5	1	0.2	0	0	-	0	0	-
I	11231544	A-G	+	intron	Y53H1A.5	3	0	0	3	2	0.666667	1	1	1	0	0	-	0	0	-	0	0	-	2	0	0	5	1	0.2	0	0	-	0	0	-
I	11231545	A-G	+	intron	Y53H1A.5	3	0	0	3	0	0	1	0	0	0	0	-	0	0	-	0	0	-	2	0	0	5	2	0.4	0	0	-	0	0	-
I	11231546	A-G	+	intron	Y53H1A.5	3	0	0	3	1	0.333333	1	0	0	0	0	-	0	0	-	0	0	-	2	0	0	5	3	0.6	0	0	-	0	0	-
I	11231551	A-G	+	intron	Y53H1A.5	3	0	0	3	2	0.666667	1	0	0	0	0	-	0	0	-	0	0	-	2	1	0.5	5	1	0.2	0	0	-	0	0	-
I	11231558	A-G	+	intron	Y53H1A.5	3	1	0.333333	3	3	1	1	1	1	0	0	-	0	0	-	0	0	-	2	2	1	6	4	0.666667	0	0	-	0	0	-
I	11231565	A-G	+	intron	Y53H1A.5	3	1	0.333333	3	3	1	1	1	1	0	0	-	0	0	-	0	0	-	2	2	1	6	3	0.5	0	0	-	0	0	-
I	11231575	A-G	+	intron	Y53H1A.5	1	0	0	3	3	1	1	1	1	0	0	-	0	0	-	0	0	-	2	0	0	4	0	0	0	0	-	0	0	-
I	11231578	A-G	+	intron	Y53H1A.5	1	0	0	3	1	0.333333	1	1	1	0	0	-	0	0	-	0	0	-	2	0	0	4	0	0	0	0	-	0	0	-
I	11231580	A-G	+	intron	Y53H1A.5	1	0	0	3	2	0.666667	1	0	0	0	0	-	0	0	-	0	0	-	2	1	0.5	4	3	0.75	0	0	-	0	0	-
I	11231581	A-G	+	intron	Y53H1A.5	1	0	0	3	3	1	1	1	1	0	0	-	0	0	-	0	0	-	2	2	1	4	3	0.75	0	0	-	0	0	-
I	11231586	A-G	+	intron	Y53H1A.5	1	0	0	3	2	0.666667	1	0	0	0	0	-	0	0	-	0	0	-	2	1	0.5	4	2	0.5	0	0	-	0	0	-
I	11231587	A-G	+	intron	Y53H1A.5	1	0	0	3	3	1	1	1	1	0	0	-	0	0	-	0	0	-	2	1	0.5	4	0	0	0	0	-	0	0	-
I	11231588	A-G	+	intron	Y53H1A.5	1	0	0	3	3	1	1	0	0	0	0	-	0	0	-	0	0	-	2	0	0	4	0	0	0	0	-	0	0	-
I	11231592	A-G	+	intron	Y53H1A.5	1	0	0	3	3	1	1	0	0	0	0	-	0	0	-	0	0	-	2	1	0.5	4	3	0.75	0	0	-	0	0	-
I	11231595	A-G	+	intron	Y53H1A.5	1	0	0	3	3	1	1	0	0	0	0	-	0	0	-	0	0	-	2	0	0	4	1	0.25	0	0	-	0	0	-
I	11231602	A-G	+	intron	Y53H1A.5	1	0	0	3	3	1	1	0	0	0	0	-	0	0	-	0	0	-	2	1	0.5	5	1	0.2	0	0	-	0	0	-
I	11231623	A-G	+	intron	Y53H1A.5	0	0	-	3	2	0.666667	0	0	-	0	0	-	0	0	-	0	0	-	1	0	0	2	0	0	0	0	-	0	0	-
I	11231638	A-G	+	intron	Y53H1A.5	0	0	-	3	3	1	0	0	-	0	0	-	0	0	-	0	0	-	2	0	0	2	0	0	0	0	-	0	0	-
I	11231646	A-G	+	intron	Y53H1A.5	0	0	-	2	2	1	0	0	-	0	0	-	0	0	-	0	0	-	2	0	0	3	1	0.333333	0	0	-	0	0	-
I	11231647	A-G	+	intron	Y53H1A.5	0	0	-	2	2	1	0	0	-	0	0	-	0	0	-	0	0	-	2	0	0	3	1	0.333333	0	0	-	0	0	-
I	11231650	A-G	+	intron	Y53H1A.5	0	0	-	2	2	1	0	0	-	0	0	-	0	0	-	0	0	-	2	0	0	3	1	0.333333	0	0	-	0	0	-
I	11231667	A-G	+	intron	Y53H1A.5	0	0	-	2	2	1	0	0	-	0	0	-	0	0	-	0	0	-	2	1	0.5	3	1	0.333333	0	0	-	0	0	-
I	11232243	A-G	+	intron	Y53H1A.5	2	2	1	0	0	-	0	0	-	0	0	-	1	1	1	0	0	-	0	0	-	0	0	-	1	1	1	0	0	-
I	11232244	A-G	+	intron	Y53H1A.5	2	2	1	0	0	-	0	0	-	0	0	-	1	0	0	0	0	-	0	0	-	0	0	-	1	0	0	1	0	0
I	11232254	A-G	+	intron	Y53H1A.5	2	1	0.5	0	0	-	0	0	-	0	0	-	1	1	1	0	0	-	0	0	-	0	0	-	1	1	1	1	1	1
I	11232262	A-G	+	intron	Y53H1A.5	2	1	0.5	0	0	-	0	0	-	0	0	-	1	1	1	0	0	-	0	0	-	0	0	-	1	1	1	1	1	1
I	11232267	A-G	+	intron	Y53H1A.5	2	1	0.5	0	0	-	0	0	-	0	0	-	1	1	1	0	0	-	0	0	-	0	0	-	1	1	1	1	1	1
I	11232268	A-G	+	intron	Y53H1A.5	2	1	0.5	0	0	-	0	0	-	0	0	-	1	1	1	0	0	-	0	0	-	0	0	-	1	0	0	1	1	1
I	11232277	A-G	+	intron	Y53H1A.5	2	2	1	0	0	-	0	0	-	0	0	-	1	1	1	0	0	-	0	0	-	0	0	-	1	1	1	1	1	1
I	11232278	A-G	+	intron	Y53H1A.5	2	2	1	0	0	-	0	0	-	0	0	-	1	1	1	0	0	-	0	0	-	0	0	-	0	0	-	1	1	1
I	11232287	A-G	+	intron	Y53H1A.5	1	1	1	0	0	-	0	0	-	0	0	-	1	1	1	0	0	-	0	0	-	0	0	-	1	0	0	1	0	0
I	11232293	A-G	+	intron	Y53H1A.5	1	1	1	0	0	-	0	0	-	0	0	-	1	1	1	0	0	-	0	0	-	0	0	-	0	0	-	1	1	1
I	11232313	A-G	+	intron	Y53H1A.5	2	2	1	0	0	-	0	0	-	0	0	-	1	1	1	0	0	-	0	0	-	0	0	-	1	0	0	1	1	1
I	11232314	A-G	+	intron	Y53H1A.5	2	1	0.5	0	0	-	0	0	-	0	0	-	1	0	0	0	0	-	0	0	-	0	0	-	1	1	1	1	1	1
I	11232315	A-G	+	intron	Y53H1A.5	2	2	1	0	0	-	0	0	-	0	0	-	1	0	0	0	0	-	0	0	-	0	0	-	1	1	1	1	1	1
I	11232316	A-G	+	intron	Y53H1A.5	2	1	0.5	0	0	-	0	0	-	0	0	-	1	0	0	0	0	-	0	0	-	0	0	-	1	1	1	1	1	1
I	11232317	A-G	+	intron	Y53H1A.5	2	2	1	0	0	-	0	0	-	0	0	-	1	0	0	0	0	-	0	0	-	0	0	-	1	1	1	1	0	0
I	11232331	A-G	+	intron	Y53H1A.5	2	2	1	0	0	-	0	0	-	0	0	-	1	0	0	0	0	-	0	0	-	0	0	-	1	1	1	1	0	0
I	11232338	A-G	+	intron	Y53H1A.5	2	2	1	0	0	-	0	0	-	0	0	-	1	0	0	0	0	-	0	0	-	0	0	-	1	0	0	1	0	0
I	11232346	A-G	+	intron	Y53H1A.5	2	2	1	0	0	-	0	0	-	0	0	-	0	0	-	0	0	-	0	0	-	0	0	-	1	1	1	0	0	-
I	11232347	A-G	+	intron	Y53H1A.5	2	2	1	0	0	-	0	0	-	0	0	-	0	0	-	0	0	-	0	0	-	0	0	-	1	1	1	0	0	-
I	11232348	A-G	+	intron	Y53H1A.5	2	2	1	0	0	-	0	0	-	0	0	-	0	0	-	0	0	-	0	0	-	0	0	-	1	0	0	0	0	-
I	11232353	A-G	+	intron	Y53H1A.5	2	2	1	0	0	-	0	0	-	0	0	-	0	0	-	0	0	-	0	0	-	0	0	-	1	1	1	0	0	-
I	11232374	A-G	+	intron	Y53H1A.5	2	2	1	0	0	-	0	0	-	0	0	-	0	0	-	0	0	-	0	0	-	0	0	-	1	0	0	0	0	-
I	11232375	A-G	+	intron	Y53H1A.5	2	2	1	0	0	-	0	0	-	0	0	-	0	0	-	0	0	-	0	0	-	0	0	-	1	0	0	0	0	-
I	11232379	A-G	+	intron	Y53H1A.5	2	2	1	0	0	-	0	0	-	0	0	-	0	0	-	0	0	-	0	0	-	0	0	-	1	0	0	0	0	-
I	11232385	A-G	+	intron	Y53H1A.5	2	2	1	0	0	-	0	0	-	0	0	-	0	0	-	0	0	-	0	0	-	0	0	-	1	0	0	0	0	-
I	11232437	A-G	+	intron	Y53H1A.5	1	1	1	0	0	-	0	0	-	0	0	-	0	0	-	0	0	-	1	1	1	2	2	1	0	0	-	0	0	-
I	11232451	A-G	+	intron	Y53H1A.5	5	4	0.8	1	1	1	0	0	-	1	0	0	0	0	-	0	0	-	1	1	1	3	2	0.666667	0	0	-	0	0	-
I	11232454	A-G	+	intron	Y53H1A.5	5	0	0	2	1	0.5	0	0	-	1	0	0	0	0	-	0	0	-	1	0	0	3	3	1	0	0	-	0	0	-
I	11232474	A-G	+	intron	Y53H1A.5	5	3	0.6	2	1	0.5	0	0	-	1	0	0	0	0	-	0	0	-	2	1	0.5	3	3	1	0	0	-	0	0	-
I	11260331	A-G	+	antisense	F36D1.12;F36D1.8	0	0	-	0	0	-	0	0	-	0	0	-	0	0	-	2	2	1	0	0	-	0	0	-	0	0	-	0	0	-
I	11300712	A-G	+	upstream	Y53H1B.4	1	1	1	1	1	1	0	0	-	0	0	-	0	0	-	0	0	-	0	0	-	2	2	1	0	0	-	0	0	-
I	11300718	A-G	+	upstream	Y53H1B.4	1	1	1	1	1	1	0	0	-	0	0	-	0	0	-	0	0	-	0	0	-	3	1	0.333333	0	0	-	0	0	-
I	11300719	A-G	+	upstream	Y53H1B.4	1	1	1	1	1	1	0	0	-	0	0	-	0	0	-	0	0	-	0	0	-	4	3	0.75	0	0	-	0	0	-
I	11300722	A-G	+	upstream	Y53H1B.4	1	1	1	1	1	1	0	0	-	0	0	-	0	0	-	0	0	-	0	0	-	4	3	0.75	0	0	-	0	0	-
I	11300724	A-G	+	upstream	Y53H1B.4	1	1	1	1	1	1	0	0	-	0	0	-	0	0	-	0	0	-	0	0	-	4	0	0	0	0	-	0	0	-
I	11300734	A-G	+	upstream	Y53H1B.4	1	1	1	1	0	0	0	0	-	0	0	-	0	0	-	0	0	-	0	0	-	5	5	1	0	0	-	0	0	-
I	11300735	A-G	+	CDS	Y53H1B.4	2	2	1	1	1	1	0	0	-	0	0	-	0	0	-	0	0	-	0	0	-	5	5	1	0	0	-	0	0	-
I	11300752	A-G	+	CDS	Y53H1B.4	4	0	0	2	1	0.5	0	0	-	0	0	-	0	0	-	0	0	-	1	0	0	12	2	0.166667	0	0	-	0	0	-
I	11300764	A-G	+	CDS	Y53H1B.4	5	0	0	3	2	0.666667	0	0	-	0	0	-	0	0	-	0	0	-	2	0	0	15	4	0.266667	0	0	-	0	0	-
I	11300765	A-G	+	CDS	Y53H1B.4	5	0	0	3	2	0.666667	0	0	-	0	0	-	0	0	-	0	0	-	2	0	0	16	6	0.375	0	0	-	0	0	-
I	11300771	A-G	+	intron	Y53H1B.4	5	0	0	3	2	0.666667	0	0	-	0	0	-	0	0	-	0	0	-	2	0	0	18	4	0.222222	0	0	-	0	0	-
I	11301252	A-G	+	CDS	Y53H1B.4	0	0	-	2	2	1	0	0	-	0	0	-	0	0	-	0	0	-	1	0	0	4	1	0.25	0	0	-	0	0	-
I	11301257	A-G	+	CDS	Y53H1B.4	0	0	-	2	2	1	0	0	-	0	0	-	0	0	-	0	0	-	1	0	0	4	1	0.25	0	0	-	0	0	-
I	11301270	A-G	+	CDS	Y53H1B.4	0	0	-	1	1	1	0	0	-	0	0	-	0	0	-	0	0	-	1	0	0	5	2	0.4	0	0	-	0	0	-
I	11301271	A-G	+	CDS	Y53H1B.4	0	0	-	2	2	1	0	0	-	0	0	-	0	0	-	0	0	-	1	0	0	5	4	0.8	0	0	-	0	0	-
I	11301272	A-G	+	CDS	Y53H1B.4	0	0	-	2	2	1	0	0	-	0	0	-	0	0	-	0	0	-	1	0	0	5	4	0.8	0	0	-	0	0	-
I	11302190	A-G	+	upstream	H25P06.4;Y53H1B.6	0	0	-	0	0	-	0	0	-	0	0	-	0	0	-	0	0	-	0	0	-	2	2	1	0	0	-	0	0	-
I	11302196	A-G	+	upstream	H25P06.4;Y53H1B.6	0	0	-	0	0	-	0	0	-	0	0	-	0	0	-	0	0	-	0	0	-	2	2	1	0	0	-	0	0	-
I	11325628	A-G	+	intron	H25P06.2	0	0	-	2	2	1	0	0	-	0	0	-	0	0	-	0	0	-	0	0	-	0	0	-	0	0	-	0	0	-
I	11325632	A-G	+	intron	H25P06.2	0	0	-	2	2	1	0	0	-	0	0	-	0	0	-	0	0	-	0	0	-	0	0	-	0	0	-	0	0	-
I	11325633	A-G	+	intron	H25P06.2	0	0	-	2	2	1	0	0	-	0	0	-	0	0	-	0	0	-	0	0	-	0	0	-	0	0	-	0	0	-
I	11325637	A-G	+	intron	H25P06.2	0	0	-	2	2	1	0	0	-	0	0	-	0	0	-	0	0	-	0	0	-	0	0	-	0	0	-	0	0	-
I	11325638	A-G	+	intron	H25P06.2	0	0	-	2	2	1	0	0	-	0	0	-	0	0	-	0	0	-	0	0	-	0	0	-	0	0	-	0	0	-
I	11325677	A-G	+	intron	H25P06.2	0	0	-	3	3	1	0	0	-	0	0	-	0	0	-	0	0	-	0	0	-	0	0	-	0	0	-	0	0	-
I	11325679	A-G	+	intron	H25P06.2	0	0	-	3	2	0.666667	0	0	-	0	0	-	0	0	-	0	0	-	0	0	-	0	0	-	0	0	-	0	0	-
I	11325680	A-G	+	intron	H25P06.2	0	0	-	3	3	1	0	0	-	0	0	-	0	0	-	0	0	-	0	0	-	0	0	-	0	0	-	0	0	-
I	11354307	A-G	+	intron	null	1	0	0	0	0	-	0	0	-	0	0	-	0	0	-	2	2	1	0	0	-	1	1	1	0	0	-	0	0	-
I	11354321	A-G	+	intron	null	1	0	0	0	0	-	0	0	-	0	0	-	0	0	-	2	2	1	0	0	-	1	0	0	0	0	-	0	0	-
I	11354322	A-G	+	intron	null	1	1	1	0	0	-	0	0	-	0	0	-	0	0	-	2	2	1	0	0	-	1	1	1	0	0	-	0	0	-
I	11367218	A-G	-	intron	F56G4.6	0	0	-	0	0	-	0	0	-	0	0	-	0	0	-	0	0	-	0	0	-	0	0	-	0	0	-	0	0	-
I	11367232	A-G	-	intron	F56G4.6	0	0	-	0	0	-	0	0	-	0	0	-	0	0	-	0	0	-	0	0	-	0	0	-	0	0	-	0	0	-
I	11367562	A-G	-	intron	F56G4.6	0	0	-	0	0	-	0	0	-	0	0	-	0	0	-	0	0	-	0	0	-	0	0	-	0	0	-	0	0	-
I	11367599	A-G	-	intron	F56G4.6	0	0	-	0	0	-	0	0	-	0	0	-	0	0	-	0	0	-	0	0	-	0	0	-	0	0	-	0	0	-
I	11367733	A-G	-	intron	F56G4.6	0	0	-	0	0	-	0	0	-	0	0	-	0	0	-	0	0	-	0	0	-	0	0	-	0	0	-	0	0	-
I	11367734	A-G	-	intron	F56G4.6	0	0	-	0	0	-	0	0	-	0	0	-	0	0	-	0	0	-	0	0	-	0	0	-	0	0	-	0	0	-
I	11367735	A-G	-	intron	F56G4.6	0	0	-	0	0	-	0	0	-	0	0	-	0	0	-	0	0	-	0	0	-	0	0	-	0	0	-	0	0	-
I	11367736	A-G	-	intron	F56G4.6	0	0	-	0	0	-	0	0	-	0	0	-	0	0	-	0	0	-	0	0	-	0	0	-	0	0	-	0	0	-
I	11367739	A-G	-	intron	F56G4.6	0	0	-	0	0	-	0	0	-	0	0	-	0	0	-	0	0	-	0	0	-	0	0	-	0	0	-	0	0	-
I	11367771	A-G	-	intron	F56G4.6	0	0	-	0	0	-	0	0	-	0	0	-	0	0	-	0	0	-	0	0	-	0	0	-	0	0	-	0	0	-
I	11367782	A-G	-	intron	F56G4.6	0	0	-	0	0	-	0	0	-	0	0	-	0	0	-	0	0	-	0	0	-	0	0	-	0	0	-	0	0	-
I	11367791	A-G	-	intron	F56G4.6	0	0	-	0	0	-	0	0	-	0	0	-	0	0	-	0	0	-	0	0	-	0	0	-	0	0	-	0	0	-
I	11367792	A-G	-	intron	F56G4.6	0	0	-	0	0	-	0	0	-	0	0	-	0	0	-	0	0	-	0	0	-	0	0	-	0	0	-	0	0	-
I	1138296	A-G	-	intron	Y48G8AL.10;Y48G8AL.9	0	0	-	0	0	-	0	0	-	0	0	-	0	0	-	0	0	-	0	0	-	0	0	-	0	0	-	0	0	-
I	1138300	A-G	-	intron	Y48G8AL.10;Y48G8AL.9	0	0	-	0	0	-	0	0	-	0	0	-	0	0	-	0	0	-	0	0	-	0	0	-	0	0	-	0	0	-
I	1138301	A-G	-	intron	Y48G8AL.10;Y48G8AL.9	0	0	-	0	0	-	0	0	-	0	0	-	0	0	-	0	0	-	0	0	-	0	0	-	0	0	-	0	0	-
I	1138302	A-G	-	intron	Y48G8AL.10;Y48G8AL.9	0	0	-	0	0	-	0	0	-	0	0	-	0	0	-	0	0	-	0	0	-	0	0	-	0	0	-	0	0	-
I	1138308	A-G	-	intron	Y48G8AL.10;Y48G8AL.9	0	0	-	0	0	-	0	0	-	0	0	-	0	0	-	0	0	-	0	0	-	0	0	-	0	0	-	0	0	-
I	1138311	A-G	-	intron	Y48G8AL.10;Y48G8AL.9	0	0	-	0	0	-	0	0	-	0	0	-	0	0	-	0	0	-	0	0	-	0	0	-	0	0	-	0	0	-
I	1138327	A-G	-	intron	Y48G8AL.10;Y48G8AL.9	0	0	-	0	0	-	0	0	-	0	0	-	0	0	-	0	0	-	0	0	-	0	0	-	0	0	-	0	0	-
I	1138329	A-G	-	intron	Y48G8AL.10;Y48G8AL.9	0	0	-	0	0	-	0	0	-	0	0	-	0	0	-	0	0	-	0	0	-	0	0	-	0	0	-	0	0	-
I	1138331	A-G	-	intron	Y48G8AL.10;Y48G8AL.9	0	0	-	0	0	-	0	0	-	0	0	-	0	0	-	0	0	-	0	0	-	0	0	-	0	0	-	0	0	-
I	1138332	A-G	-	intron	Y48G8AL.10;Y48G8AL.9	0	0	-	0	0	-	0	0	-	0	0	-	0	0	-	0	0	-	0	0	-	0	0	-	0	0	-	0	0	-
I	1138339	A-G	-	intron	Y48G8AL.10;Y48G8AL.9	0	0	-	0	0	-	0	0	-	0	0	-	0	0	-	0	0	-	0	0	-	0	0	-	0	0	-	0	0	-
I	1138340	A-G	-	intron	Y48G8AL.10;Y48G8AL.9	0	0	-	0	0	-	0	0	-	0	0	-	0	0	-	0	0	-	0	0	-	0	0	-	0	0	-	0	0	-
I	1138345	A-G	-	intron	Y48G8AL.10;Y48G8AL.9	0	0	-	0	0	-	0	0	-	0	0	-	0	0	-	0	0	-	0	0	-	0	0	-	0	0	-	0	0	-
I	1138353	A-G	-	intron	Y48G8AL.10;Y48G8AL.9	0	0	-	0	0	-	0	0	-	0	0	-	0	0	-	0	0	-	0	0	-	0	0	-	0	0	-	0	0	-
I	1138355	A-G	-	intron	Y48G8AL.10;Y48G8AL.9	0	0	-	0	0	-	0	0	-	0	0	-	0	0	-	0	0	-	0	0	-	0	0	-	0	0	-	0	0	-
I	1138362	A-G	-	intron	Y48G8AL.10;Y48G8AL.9	0	0	-	0	0	-	0	0	-	0	0	-	0	0	-	0	0	-	0	0	-	0	0	-	0	0	-	0	0	-
I	1138365	A-G	-	intron	Y48G8AL.10;Y48G8AL.9	0	0	-	0	0	-	0	0	-	0	0	-	0	0	-	0	0	-	0	0	-	0	0	-	0	0	-	0	0	-
I	1138381	A-G	-	intron	Y48G8AL.10;Y48G8AL.9	0	0	-	0	0	-	0	0	-	0	0	-	0	0	-	0	0	-	0	0	-	0	0	-	0	0	-	0	0	-
I	1138388	A-G	-	intron	Y48G8AL.10;Y48G8AL.9	0	0	-	0	0	-	0	0	-	0	0	-	0	0	-	0	0	-	0	0	-	0	0	-	0	0	-	0	0	-
I	1138442	A-G	-	intron	Y48G8AL.10;Y48G8AL.9	0	0	-	0	0	-	0	0	-	0	0	-	0	0	-	0	0	-	0	0	-	0	0	-	0	0	-	0	0	-
I	1138602	A-G	-	intron	Y48G8AL.10;Y48G8AL.9	0	0	-	0	0	-	0	0	-	0	0	-	0	0	-	0	0	-	0	0	-	0	0	-	0	0	-	0	0	-
I	1138603	A-G	-	intron	Y48G8AL.10;Y48G8AL.9	0	0	-	0	0	-	0	0	-	0	0	-	0	0	-	0	0	-	0	0	-	0	0	-	0	0	-	0	0	-
I	1138607	A-G	-	intron	Y48G8AL.10;Y48G8AL.9	0	0	-	0	0	-	0	0	-	0	0	-	0	0	-	0	0	-	0	0	-	0	0	-	0	0	-	0	0	-
I	1138608	A-G	-	intron	Y48G8AL.10;Y48G8AL.9	0	0	-	0	0	-	0	0	-	0	0	-	0	0	-	0	0	-	0	0	-	0	0	-	0	0	-	0	0	-
I	1138617	A-G	-	intron	Y48G8AL.10;Y48G8AL.9	0	0	-	0	0	-	0	0	-	0	0	-	0	0	-	0	0	-	0	0	-	0	0	-	0	0	-	0	0	-
I	1138618	A-G	-	intron	Y48G8AL.10;Y48G8AL.9	0	0	-	0	0	-	0	0	-	0	0	-	0	0	-	0	0	-	0	0	-	0	0	-	0	0	-	0	0	-
I	1138623	A-G	-	intron	Y48G8AL.10;Y48G8AL.9	0	0	-	0	0	-	0	0	-	0	0	-	0	0	-	0	0	-	0	0	-	0	0	-	0	0	-	0	0	-
I	1138627	A-G	-	intron	Y48G8AL.10;Y48G8AL.9	0	0	-	0	0	-	0	0	-	0	0	-	0	0	-	0	0	-	0	0	-	0	0	-	0	0	-	0	0	-
I	1138630	A-G	-	intron	Y48G8AL.10;Y48G8AL.9	0	0	-	0	0	-	0	0	-	0	0	-	0	0	-	0	0	-	0	0	-	0	0	-	0	0	-	0	0	-
I	1138631	A-G	-	intron	Y48G8AL.10;Y48G8AL.9	0	0	-	0	0	-	0	0	-	0	0	-	0	0	-	0	0	-	0	0	-	0	0	-	0	0	-	0	0	-
I	1138641	A-G	-	intron	Y48G8AL.10;Y48G8AL.9	0	0	-	0	0	-	0	0	-	0	0	-	0	0	-	0	0	-	0	0	-	0	0	-	0	0	-	0	0	-
I	1138642	A-G	-	intron	Y48G8AL.10;Y48G8AL.9	0	0	-	0	0	-	0	0	-	0	0	-	0	0	-	0	0	-	0	0	-	0	0	-	0	0	-	0	0	-
I	1138646	A-G	-	intron	Y48G8AL.10;Y48G8AL.9	0	0	-	0	0	-	0	0	-	0	0	-	0	0	-	0	0	-	0	0	-	0	0	-	0	0	-	0	0	-
I	1138647	A-G	-	intron	Y48G8AL.10;Y48G8AL.9	0	0	-	0	0	-	0	0	-	0	0	-	0	0	-	0	0	-	0	0	-	0	0	-	0	0	-	0	0	-
I	1138651	A-G	-	intron	Y48G8AL.10;Y48G8AL.9	0	0	-	0	0	-	0	0	-	0	0	-	0	0	-	0	0	-	0	0	-	0	0	-	0	0	-	0	0	-
I	1138656	A-G	-	intron	Y48G8AL.10;Y48G8AL.9	0	0	-	0	0	-	0	0	-	0	0	-	0	0	-	0	0	-	0	0	-	0	0	-	0	0	-	0	0	-
I	1138661	A-G	-	intron	Y48G8AL.10;Y48G8AL.9	0	0	-	0	0	-	0	0	-	0	0	-	0	0	-	0	0	-	0	0	-	0	0	-	0	0	-	0	0	-
I	1138662	A-G	-	intron	Y48G8AL.10;Y48G8AL.9	0	0	-	0	0	-	0	0	-	0	0	-	0	0	-	0	0	-	0	0	-	0	0	-	0	0	-	0	0	-
I	1138663	A-G	-	intron	Y48G8AL.10;Y48G8AL.9	0	0	-	0	0	-	0	0	-	0	0	-	0	0	-	0	0	-	0	0	-	0	0	-	0	0	-	0	0	-
I	1138664	A-G	-	intron	Y48G8AL.10;Y48G8AL.9	0	0	-	0	0	-	0	0	-	0	0	-	0	0	-	0	0	-	0	0	-	0	0	-	0	0	-	0	0	-
I	1138672	A-G	-	intron	Y48G8AL.10;Y48G8AL.9	0	0	-	0	0	-	0	0	-	0	0	-	0	0	-	0	0	-	0	0	-	0	0	-	0	0	-	0	0	-
I	1138673	A-G	-	intron	Y48G8AL.10;Y48G8AL.9	0	0	-	0	0	-	0	0	-	0	0	-	0	0	-	0	0	-	0	0	-	0	0	-	0	0	-	0	0	-
I	1138678	A-G	-	intron	Y48G8AL.10;Y48G8AL.9	0	0	-	0	0	-	0	0	-	0	0	-	0	0	-	0	0	-	0	0	-	0	0	-	0	0	-	0	0	-
I	1138679	A-G	-	intron	Y48G8AL.10;Y48G8AL.9	0	0	-	0	0	-	0	0	-	0	0	-	0	0	-	0	0	-	0	0	-	0	0	-	0	0	-	0	0	-
I	1138683	A-G	-	intron	Y48G8AL.10;Y48G8AL.9	0	0	-	0	0	-	0	0	-	0	0	-	0	0	-	0	0	-	0	0	-	0	0	-	0	0	-	0	0	-
I	1138692	A-G	-	intron	Y48G8AL.10;Y48G8AL.9	0	0	-	0	0	-	0	0	-	0	0	-	0	0	-	0	0	-	0	0	-	0	0	-	0	0	-	0	0	-
I	1138696	A-G	-	intron	Y48G8AL.10;Y48G8AL.9	0	0	-	0	0	-	0	0	-	0	0	-	0	0	-	0	0	-	0	0	-	0	0	-	0	0	-	0	0	-
I	1138702	A-G	-	intron	Y48G8AL.10;Y48G8AL.9	0	0	-	0	0	-	0	0	-	0	0	-	0	0	-	0	0	-	0	0	-	0	0	-	0	0	-	0	0	-
I	11387875	A-G	+	intron	F56G4.5	0	0	-	1	1	1	0	0	-	1	1	1	0	0	-	0	0	-	0	0	-	0	0	-	0	0	-	0	0	-
I	11390286	A-G	-	intron	Y53H1C.1	0	0	-	0	0	-	0	0	-	0	0	-	0	0	-	0	0	-	0	0	-	0	0	-	0	0	-	0	0	-
I	11390288	A-G	-	intron	Y53H1C.1	0	0	-	0	0	-	0	0	-	0	0	-	0	0	-	0	0	-	0	0	-	0	0	-	0	0	-	0	0	-
I	1139053	A-G	-	intron	Y48G8AL.10;Y48G8AL.9	0	0	-	0	0	-	0	0	-	0	0	-	0	0	-	0	0	-	0	0	-	0	0	-	0	0	-	0	0	-
I	1139058	A-G	-	intron	Y48G8AL.10;Y48G8AL.9	0	0	-	0	0	-	0	0	-	0	0	-	0	0	-	0	0	-	0	0	-	0	0	-	0	0	-	0	0	-
I	1139103	A-G	-	intron	Y48G8AL.10;Y48G8AL.9	0	0	-	0	0	-	0	0	-	0	0	-	0	0	-	0	0	-	0	0	-	0	0	-	0	0	-	0	0	-
I	1139106	A-G	-	intron	Y48G8AL.10;Y48G8AL.9	0	0	-	0	0	-	0	0	-	0	0	-	0	0	-	0	0	-	0	0	-	0	0	-	0	0	-	0	0	-
I	1139128	A-G	-	intron	Y48G8AL.10;Y48G8AL.9	0	0	-	0	0	-	0	0	-	0	0	-	0	0	-	0	0	-	0	0	-	0	0	-	0	0	-	0	0	-
I	1139161	A-G	-	intron	Y48G8AL.10;Y48G8AL.9	0	0	-	0	0	-	0	0	-	0	0	-	0	0	-	0	0	-	0	0	-	0	0	-	0	0	-	0	0	-
I	1139162	A-G	-	intron	Y48G8AL.10;Y48G8AL.9	0	0	-	0	0	-	0	0	-	0	0	-	0	0	-	0	0	-	0	0	-	0	0	-	0	0	-	0	0	-
I	1139182	A-G	-	intron	Y48G8AL.10;Y48G8AL.9	0	0	-	0	0	-	0	0	-	0	0	-	0	0	-	0	0	-	0	0	-	0	0	-	0	0	-	0	0	-
I	1139387	A-G	-	intron	Y48G8AL.10;Y48G8AL.9	0	0	-	0	0	-	0	0	-	0	0	-	0	0	-	0	0	-	0	0	-	0	0	-	0	0	-	0	0	-
I	1139397	A-G	-	intron	Y48G8AL.10;Y48G8AL.9	0	0	-	0	0	-	0	0	-	0	0	-	0	0	-	0	0	-	0	0	-	0	0	-	0	0	-	0	0	-
I	1139414	A-G	-	intron	Y48G8AL.10;Y48G8AL.9	0	0	-	0	0	-	0	0	-	0	0	-	0	0	-	0	0	-	0	0	-	0	0	-	0	0	-	0	0	-
I	1145407	A-G	-	intron	Y48G8AL.10	0	0	-	0	0	-	0	0	-	0	0	-	0	0	-	0	0	-	0	0	-	0	0	-	0	0	-	0	0	-
I	1145416	A-G	-	intron	Y48G8AL.10	0	0	-	0	0	-	0	0	-	0	0	-	0	0	-	0	0	-	0	0	-	0	0	-	0	0	-	0	0	-
I	1149056	A-G	-	intron	Y48G8AL.10	0	0	-	0	0	-	0	0	-	0	0	-	0	0	-	0	0	-	0	0	-	0	0	-	0	0	-	0	0	-
I	1149060	A-G	-	intron	Y48G8AL.10	0	0	-	0	0	-	0	0	-	0	0	-	0	0	-	0	0	-	0	0	-	0	0	-	0	0	-	0	0	-
I	1149061	A-G	-	intron	Y48G8AL.10	0	0	-	0	0	-	0	0	-	0	0	-	0	0	-	0	0	-	0	0	-	0	0	-	0	0	-	0	0	-
I	1149062	A-G	-	intron	Y48G8AL.10	0	0	-	0	0	-	0	0	-	0	0	-	0	0	-	0	0	-	0	0	-	0	0	-	0	0	-	0	0	-
I	1149069	A-G	-	intron	Y48G8AL.10	0	0	-	0	0	-	0	0	-	0	0	-	0	0	-	0	0	-	0	0	-	0	0	-	0	0	-	0	0	-
I	1149073	A-G	-	intron	Y48G8AL.10	0	0	-	0	0	-	0	0	-	0	0	-	0	0	-	0	0	-	0	0	-	0	0	-	0	0	-	0	0	-
I	1149078	A-G	-	intron	Y48G8AL.10	0	0	-	0	0	-	0	0	-	0	0	-	0	0	-	0	0	-	0	0	-	0	0	-	0	0	-	0	0	-
I	1149082	A-G	-	intron	Y48G8AL.10	0	0	-	0	0	-	0	0	-	0	0	-	0	0	-	0	0	-	0	0	-	0	0	-	0	0	-	0	0	-
I	1149083	A-G	-	intron	Y48G8AL.10	0	0	-	0	0	-	0	0	-	0	0	-	0	0	-	0	0	-	0	0	-	0	0	-	0	0	-	0	0	-
I	1149092	A-G	-	intron	Y48G8AL.10	0	0	-	0	0	-	0	0	-	0	0	-	0	0	-	0	0	-	0	0	-	0	0	-	0	0	-	0	0	-
I	1149093	A-G	-	intron	Y48G8AL.10	0	0	-	0	0	-	0	0	-	0	0	-	0	0	-	0	0	-	0	0	-	0	0	-	0	0	-	0	0	-
I	1149099	A-G	-	intron	Y48G8AL.10	0	0	-	0	0	-	0	0	-	0	0	-	0	0	-	0	0	-	0	0	-	0	0	-	0	0	-	0	0	-
I	1149100	A-G	-	intron	Y48G8AL.10	0	0	-	0	0	-	0	0	-	0	0	-	0	0	-	0	0	-	0	0	-	0	0	-	0	0	-	0	0	-
I	1149115	A-G	-	intron	Y48G8AL.10	0	0	-	0	0	-	0	0	-	0	0	-	0	0	-	0	0	-	0	0	-	0	0	-	0	0	-	0	0	-
I	1149120	A-G	-	intron	Y48G8AL.10	0	0	-	0	0	-	0	0	-	0	0	-	0	0	-	0	0	-	0	0	-	0	0	-	0	0	-	0	0	-
I	1149121	A-G	-	intron	Y48G8AL.10	0	0	-	0	0	-	0	0	-	0	0	-	0	0	-	0	0	-	0	0	-	0	0	-	0	0	-	0	0	-
I	1149122	A-G	-	intron	Y48G8AL.10	0	0	-	0	0	-	0	0	-	0	0	-	0	0	-	0	0	-	0	0	-	0	0	-	0	0	-	0	0	-
I	1149127	A-G	-	intron	Y48G8AL.10	0	0	-	0	0	-	0	0	-	0	0	-	0	0	-	0	0	-	0	0	-	0	0	-	0	0	-	0	0	-
I	1149133	A-G	-	intron	Y48G8AL.10	0	0	-	0	0	-	0	0	-	0	0	-	0	0	-	0	0	-	0	0	-	0	0	-	0	0	-	0	0	-
I	1149134	A-G	-	intron	Y48G8AL.10	0	0	-	0	0	-	0	0	-	0	0	-	0	0	-	0	0	-	0	0	-	0	0	-	0	0	-	0	0	-
I	1149149	A-G	-	intron	Y48G8AL.10	0	0	-	0	0	-	0	0	-	0	0	-	0	0	-	0	0	-	0	0	-	0	0	-	0	0	-	0	0	-
I	1149167	A-G	-	intron	Y48G8AL.10	0	0	-	0	0	-	0	0	-	0	0	-	0	0	-	0	0	-	0	0	-	0	0	-	0	0	-	0	0	-
I	1149182	A-G	-	intron	Y48G8AL.10	0	0	-	0	0	-	0	0	-	0	0	-	0	0	-	0	0	-	0	0	-	0	0	-	0	0	-	0	0	-
I	1149183	A-G	-	intron	Y48G8AL.10	0	0	-	0	0	-	0	0	-	0	0	-	0	0	-	0	0	-	0	0	-	0	0	-	0	0	-	0	0	-
I	1149184	A-G	-	intron	Y48G8AL.10	0	0	-	0	0	-	0	0	-	0	0	-	0	0	-	0	0	-	0	0	-	0	0	-	0	0	-	0	0	-
I	1149185	A-G	-	intron	Y48G8AL.10	0	0	-	0	0	-	0	0	-	0	0	-	0	0	-	0	0	-	0	0	-	0	0	-	0	0	-	0	0	-
I	1149186	A-G	-	intron	Y48G8AL.10	0	0	-	0	0	-	0	0	-	0	0	-	0	0	-	0	0	-	0	0	-	0	0	-	0	0	-	0	0	-
I	1149195	A-G	-	intron	Y48G8AL.10	0	0	-	0	0	-	0	0	-	0	0	-	0	0	-	0	0	-	0	0	-	0	0	-	0	0	-	0	0	-
I	1149196	A-G	-	intron	Y48G8AL.10	0	0	-	0	0	-	0	0	-	0	0	-	0	0	-	0	0	-	0	0	-	0	0	-	0	0	-	0	0	-
I	1149197	A-G	-	intron	Y48G8AL.10	0	0	-	0	0	-	0	0	-	0	0	-	0	0	-	0	0	-	0	0	-	0	0	-	0	0	-	0	0	-
I	1149204	A-G	-	intron	Y48G8AL.10	0	0	-	0	0	-	0	0	-	0	0	-	0	0	-	0	0	-	0	0	-	0	0	-	0	0	-	0	0	-
I	1149211	A-G	-	intron	Y48G8AL.10	0	0	-	0	0	-	0	0	-	0	0	-	0	0	-	0	0	-	0	0	-	0	0	-	0	0	-	0	0	-
I	1149212	A-G	-	intron	Y48G8AL.10	0	0	-	0	0	-	0	0	-	0	0	-	0	0	-	0	0	-	0	0	-	0	0	-	0	0	-	0	0	-
I	1149213	A-G	-	intron	Y48G8AL.10	0	0	-	0	0	-	0	0	-	0	0	-	0	0	-	0	0	-	0	0	-	0	0	-	0	0	-	0	0	-
I	1149214	A-G	-	intron	Y48G8AL.10	0	0	-	0	0	-	0	0	-	0	0	-	0	0	-	0	0	-	0	0	-	0	0	-	0	0	-	0	0	-
I	1149226	A-G	-	intron	Y48G8AL.10	0	0	-	0	0	-	0	0	-	0	0	-	0	0	-	0	0	-	0	0	-	0	0	-	0	0	-	0	0	-
I	1149232	A-G	-	intron	Y48G8AL.10	0	0	-	0	0	-	0	0	-	0	0	-	0	0	-	0	0	-	0	0	-	0	0	-	0	0	-	0	0	-
I	1149243	A-G	-	intron	Y48G8AL.10	0	0	-	0	0	-	0	0	-	0	0	-	0	0	-	0	0	-	0	0	-	0	0	-	0	0	-	0	0	-
I	1149244	A-G	-	intron	Y48G8AL.10	0	0	-	0	0	-	0	0	-	0	0	-	0	0	-	0	0	-	0	0	-	0	0	-	0	0	-	0	0	-
I	1149245	A-G	-	intron	Y48G8AL.10	0	0	-	0	0	-	0	0	-	0	0	-	0	0	-	0	0	-	0	0	-	0	0	-	0	0	-	0	0	-
I	11493497	A-G	-	intron	K08C9.8	0	0	-	0	0	-	0	0	-	0	0	-	0	0	-	0	0	-	0	0	-	0	0	-	0	0	-	0	0	-
I	11493503	A-G	-	intron	K08C9.8	0	0	-	0	0	-	0	0	-	0	0	-	0	0	-	0	0	-	0	0	-	0	0	-	0	0	-	0	0	-
I	11493520	A-G	-	intron	K08C9.8	0	0	-	0	0	-	0	0	-	0	0	-	0	0	-	0	0	-	0	0	-	0	0	-	0	0	-	0	0	-
I	11493537	A-G	-	intron	K08C9.8	0	0	-	0	0	-	0	0	-	0	0	-	0	0	-	0	0	-	0	0	-	0	0	-	0	0	-	0	0	-
I	115122	A-G	+	downstream	F53G12.8	0	0	-	0	0	-	0	0	-	1	1	1	1	1	1	0	0	-	0	0	-	0	0	-	0	0	-	0	0	-
I	115127	A-G	+	downstream	F53G12.8	0	0	-	0	0	-	0	0	-	1	1	1	1	1	1	0	0	-	0	0	-	0	0	-	0	0	-	0	0	-
I	115138	A-G	+	downstream	F53G12.8	0	0	-	0	0	-	0	0	-	1	1	1	1	1	1	0	0	-	0	0	-	0	0	-	0	0	-	0	0	-
I	115149	A-G	+	downstream/upstream	F53G12.7;F53G12.8	0	0	-	0	0	-	0	0	-	1	1	1	1	1	1	0	0	-	0	0	-	0	0	-	0	0	-	0	0	-
I	1154600	A-G	-	intron	null	1	0	0	0	0	-	0	0	-	0	0	-	0	0	-	0	0	-	0	0	-	0	0	-	0	0	-	0	0	-
I	1154606	A-G	-	intron	null	1	0	0	0	0	-	0	0	-	0	0	-	0	0	-	0	0	-	0	0	-	0	0	-	0	0	-	0	0	-
I	1154607	A-G	-	intron	null	1	0	0	0	0	-	0	0	-	0	0	-	0	0	-	0	0	-	0	0	-	0	0	-	0	0	-	0	0	-
I	1154609	A-G	-	intron	null	1	0	0	0	0	-	0	0	-	0	0	-	0	0	-	0	0	-	0	0	-	0	0	-	0	0	-	0	0	-
I	1154636	A-G	-	intron	null	1	0	0	0	0	-	0	0	-	0	0	-	0	0	-	0	0	-	0	0	-	0	0	-	0	0	-	0	0	-
I	1154637	A-G	-	intron	null	1	0	0	0	0	-	0	0	-	0	0	-	0	0	-	0	0	-	0	0	-	0	0	-	0	0	-	0	0	-
I	1154647	A-G	-	intron	null	1	0	0	0	0	-	0	0	-	0	0	-	0	0	-	0	0	-	0	0	-	0	0	-	0	0	-	0	0	-
I	1154648	A-G	-	intron	null	1	0	0	0	0	-	0	0	-	0	0	-	0	0	-	0	0	-	0	0	-	0	0	-	0	0	-	0	0	-
I	1154649	A-G	-	intron	null	1	0	0	0	0	-	0	0	-	0	0	-	0	0	-	0	0	-	0	0	-	0	0	-	0	0	-	0	0	-
I	1154653	A-G	-	intron	null	1	0	0	0	0	-	0	0	-	0	0	-	0	0	-	0	0	-	0	0	-	0	0	-	0	0	-	0	0	-
I	1154654	A-G	-	intron	null	1	0	0	0	0	-	0	0	-	0	0	-	0	0	-	0	0	-	0	0	-	0	0	-	0	0	-	0	0	-
I	1154657	A-G	-	intron	null	1	0	0	0	0	-	0	0	-	0	0	-	0	0	-	0	0	-	0	0	-	0	0	-	0	0	-	0	0	-
I	1154658	A-G	-	intron	null	1	0	0	0	0	-	0	0	-	0	0	-	0	0	-	0	0	-	0	0	-	0	0	-	0	0	-	0	0	-
I	1154659	A-G	-	intron	null	1	0	0	0	0	-	0	0	-	0	0	-	0	0	-	0	0	-	0	0	-	0	0	-	0	0	-	0	0	-
I	1154661	A-G	-	intron	null	1	0	0	0	0	-	0	0	-	0	0	-	0	0	-	0	0	-	0	0	-	0	0	-	0	0	-	0	0	-
I	1154662	A-G	-	intron	null	1	0	0	0	0	-	0	0	-	0	0	-	0	0	-	0	0	-	0	0	-	0	0	-	0	0	-	0	0	-
I	1154663	A-G	-	intron	null	1	0	0	0	0	-	0	0	-	0	0	-	0	0	-	0	0	-	0	0	-	0	0	-	0	0	-	0	0	-
I	1154664	A-G	-	intron	null	1	0	0	0	0	-	0	0	-	0	0	-	0	0	-	0	0	-	0	0	-	0	0	-	0	0	-	0	0	-
I	1154672	A-G	-	intron	null	1	0	0	0	0	-	0	0	-	0	0	-	0	0	-	0	0	-	0	0	-	0	0	-	0	0	-	0	0	-
I	1154673	A-G	-	intron	null	1	0	0	0	0	-	0	0	-	0	0	-	0	0	-	0	0	-	0	0	-	0	0	-	0	0	-	0	0	-
I	1154674	A-G	-	intron	null	1	0	0	0	0	-	0	0	-	0	0	-	0	0	-	0	0	-	0	0	-	0	0	-	0	0	-	0	0	-
I	1154675	A-G	-	intron	null	1	0	0	0	0	-	0	0	-	0	0	-	0	0	-	0	0	-	0	0	-	0	0	-	0	0	-	0	0	-
I	1154677	A-G	-	intron	null	1	0	0	0	0	-	0	0	-	0	0	-	0	0	-	0	0	-	0	0	-	0	0	-	0	0	-	0	0	-
I	1154678	A-G	-	intron	null	1	0	0	0	0	-	0	0	-	0	0	-	0	0	-	0	0	-	0	0	-	0	0	-	0	0	-	0	0	-
I	1154684	A-G	-	intron	null	1	0	0	0	0	-	0	0	-	0	0	-	0	0	-	0	0	-	0	0	-	0	0	-	0	0	-	0	0	-
I	1154686	A-G	-	intron	null	1	0	0	0	0	-	0	0	-	0	0	-	0	0	-	0	0	-	0	0	-	0	0	-	0	0	-	0	0	-
I	1154704	A-G	-	intron	null	1	0	0	0	0	-	0	0	-	0	0	-	0	0	-	0	0	-	0	0	-	0	0	-	0	0	-	0	0	-
I	1154705	A-G	-	intron	null	1	0	0	0	0	-	0	0	-	0	0	-	0	0	-	0	0	-	0	0	-	0	0	-	0	0	-	0	0	-
I	1154706	A-G	-	intron	null	1	0	0	0	0	-	0	0	-	0	0	-	0	0	-	0	0	-	0	0	-	0	0	-	0	0	-	0	0	-
I	1154709	A-G	-	intron	null	1	0	0	0	0	-	0	0	-	0	0	-	0	0	-	0	0	-	0	0	-	0	0	-	0	0	-	0	0	-
I	1154711	A-G	-	intron	null	1	0	0	0	0	-	0	0	-	0	0	-	0	0	-	0	0	-	0	0	-	0	0	-	0	0	-	0	0	-
I	1154712	A-G	-	intron	null	1	0	0	0	0	-	0	0	-	0	0	-	0	0	-	0	0	-	0	0	-	0	0	-	0	0	-	0	0	-
I	1154714	A-G	-	intron	null	1	0	0	0	0	-	0	0	-	0	0	-	0	0	-	0	0	-	0	0	-	0	0	-	0	0	-	0	0	-
I	1154715	A-G	-	intron	null	1	0	0	0	0	-	0	0	-	0	0	-	0	0	-	0	0	-	0	0	-	0	0	-	0	0	-	0	0	-
I	1154728	A-G	-	intron	null	1	0	0	0	0	-	0	0	-	0	0	-	0	0	-	0	0	-	0	0	-	0	0	-	0	0	-	0	0	-
I	1154739	A-G	-	intron	null	1	0	0	0	0	-	0	0	-	0	0	-	0	0	-	0	0	-	0	0	-	0	0	-	0	0	-	0	0	-
I	1154749	A-G	-	intron	null	1	0	0	0	0	-	0	0	-	0	0	-	0	0	-	0	0	-	0	0	-	0	0	-	0	0	-	0	0	-
I	1154757	A-G	-	intron	null	1	0	0	0	0	-	0	0	-	0	0	-	0	0	-	0	0	-	0	0	-	0	0	-	0	0	-	0	0	-
I	1154758	A-G	-	intron	null	1	0	0	0	0	-	0	0	-	0	0	-	0	0	-	0	0	-	0	0	-	0	0	-	0	0	-	0	0	-
I	1154772	A-G	-	intron	null	1	0	0	0	0	-	0	0	-	0	0	-	0	0	-	0	0	-	0	0	-	0	0	-	0	0	-	0	0	-
I	1154773	A-G	-	intron	null	1	0	0	0	0	-	0	0	-	0	0	-	0	0	-	0	0	-	0	0	-	0	0	-	0	0	-	0	0	-
I	1154777	A-G	-	intron	null	1	0	0	0	0	-	0	0	-	0	0	-	0	0	-	0	0	-	0	0	-	0	0	-	0	0	-	0	0	-
I	1154779	A-G	-	intron	null	0	0	-	0	0	-	0	0	-	0	0	-	0	0	-	0	0	-	0	0	-	0	0	-	0	0	-	0	0	-
I	1154780	A-G	-	intron	null	0	0	-	0	0	-	0	0	-	0	0	-	0	0	-	0	0	-	0	0	-	0	0	-	0	0	-	0	0	-
I	1154792	A-G	-	intron	null	0	0	-	0	0	-	0	0	-	0	0	-	0	0	-	0	0	-	0	0	-	0	0	-	0	0	-	0	0	-
I	1154798	A-G	-	intron	null	0	0	-	0	0	-	0	0	-	0	0	-	0	0	-	0	0	-	0	0	-	0	0	-	0	0	-	0	0	-
I	1154813	A-G	-	intron	null	0	0	-	0	0	-	0	0	-	0	0	-	0	0	-	0	0	-	0	0	-	0	0	-	0	0	-	0	0	-
I	1154818	A-G	-	intron	null	0	0	-	0	0	-	0	0	-	0	0	-	0	0	-	0	0	-	0	0	-	0	0	-	0	0	-	0	0	-
I	1154821	A-G	-	intron	null	0	0	-	0	0	-	0	0	-	0	0	-	0	0	-	0	0	-	0	0	-	0	0	-	0	0	-	0	0	-
I	1154825	A-G	-	intron	null	0	0	-	0	0	-	0	0	-	0	0	-	0	0	-	0	0	-	0	0	-	0	0	-	0	0	-	0	0	-
I	1154826	A-G	-	intron	null	0	0	-	0	0	-	0	0	-	0	0	-	0	0	-	0	0	-	0	0	-	0	0	-	0	0	-	0	0	-
I	1154843	A-G	-	intron	null	0	0	-	0	0	-	0	0	-	0	0	-	0	0	-	0	0	-	0	0	-	0	0	-	0	0	-	0	0	-
I	1154848	A-G	-	intron	null	0	0	-	0	0	-	0	0	-	0	0	-	0	0	-	0	0	-	0	0	-	0	0	-	0	0	-	0	0	-
I	1154849	A-G	-	intron	null	0	0	-	0	0	-	0	0	-	0	0	-	0	0	-	0	0	-	0	0	-	0	0	-	0	0	-	0	0	-
I	1154850	A-G	-	intron	null	0	0	-	0	0	-	0	0	-	0	0	-	0	0	-	0	0	-	0	0	-	0	0	-	0	0	-	0	0	-
I	1154851	A-G	-	intron	null	0	0	-	0	0	-	0	0	-	0	0	-	0	0	-	0	0	-	0	0	-	0	0	-	0	0	-	0	0	-
I	1154861	A-G	-	intron	null	0	0	-	0	0	-	0	0	-	0	0	-	0	0	-	0	0	-	0	0	-	0	0	-	0	0	-	0	0	-
I	1154864	A-G	-	intron	null	0	0	-	0	0	-	0	0	-	0	0	-	0	0	-	0	0	-	0	0	-	0	0	-	0	0	-	0	0	-
I	1154866	A-G	-	intron	null	0	0	-	0	0	-	0	0	-	0	0	-	0	0	-	0	0	-	0	0	-	0	0	-	0	0	-	0	0	-
I	1154868	A-G	-	intron	null	0	0	-	0	0	-	0	0	-	0	0	-	0	0	-	0	0	-	0	0	-	0	0	-	0	0	-	0	0	-
I	1154870	A-G	-	intron	null	0	0	-	0	0	-	0	0	-	0	0	-	0	0	-	0	0	-	0	0	-	0	0	-	0	0	-	0	0	-
I	1154873	A-G	-	intron	null	0	0	-	0	0	-	0	0	-	0	0	-	0	0	-	0	0	-	0	0	-	0	0	-	0	0	-	0	0	-
I	1154876	A-G	-	intron	null	0	0	-	0	0	-	0	0	-	0	0	-	0	0	-	0	0	-	0	0	-	0	0	-	0	0	-	0	0	-
I	1154877	A-G	-	intron	null	0	0	-	0	0	-	0	0	-	0	0	-	0	0	-	0	0	-	0	0	-	0	0	-	0	0	-	0	0	-
I	1154881	A-G	-	intron	null	0	0	-	0	0	-	0	0	-	0	0	-	0	0	-	0	0	-	0	0	-	0	0	-	0	0	-	0	0	-
I	1154882	A-G	-	intron	null	0	0	-	0	0	-	0	0	-	0	0	-	0	0	-	0	0	-	0	0	-	0	0	-	0	0	-	0	0	-
I	1154884	A-G	-	intron	null	0	0	-	0	0	-	0	0	-	0	0	-	0	0	-	0	0	-	0	0	-	0	0	-	0	0	-	0	0	-
I	1154890	A-G	-	intron	null	0	0	-	0	0	-	0	0	-	0	0	-	0	0	-	0	0	-	0	0	-	0	0	-	0	0	-	0	0	-
I	1154894	A-G	-	intron	null	0	0	-	0	0	-	0	0	-	0	0	-	0	0	-	0	0	-	0	0	-	0	0	-	0	0	-	0	0	-
I	1154897	A-G	-	intron	null	0	0	-	0	0	-	0	0	-	0	0	-	0	0	-	0	0	-	0	0	-	0	0	-	0	0	-	0	0	-
I	1154898	A-G	-	intron	null	0	0	-	0	0	-	0	0	-	0	0	-	0	0	-	0	0	-	0	0	-	0	0	-	0	0	-	0	0	-
I	1154900	A-G	-	intron	null	0	0	-	0	0	-	0	0	-	0	0	-	0	0	-	0	0	-	0	0	-	0	0	-	0	0	-	0	0	-
I	1154903	A-G	-	intron	null	0	0	-	0	0	-	0	0	-	0	0	-	0	0	-	0	0	-	0	0	-	0	0	-	0	0	-	0	0	-
I	1154915	A-G	-	intron	null	0	0	-	0	0	-	0	0	-	0	0	-	0	0	-	0	0	-	0	0	-	0	0	-	0	0	-	0	0	-
I	1154924	A-G	-	intron	null	0	0	-	0	0	-	0	0	-	0	0	-	0	0	-	0	0	-	0	0	-	0	0	-	0	0	-	0	0	-
I	1154925	A-G	-	intron	null	0	0	-	0	0	-	0	0	-	0	0	-	0	0	-	0	0	-	0	0	-	0	0	-	0	0	-	0	0	-
I	1154926	A-G	-	intron	null	0	0	-	0	0	-	0	0	-	0	0	-	0	0	-	0	0	-	0	0	-	0	0	-	0	0	-	0	0	-
I	1154934	A-G	-	intron	null	0	0	-	0	0	-	0	0	-	0	0	-	0	0	-	0	0	-	0	0	-	0	0	-	0	0	-	0	0	-
I	1154940	A-G	-	intron	null	0	0	-	0	0	-	0	0	-	0	0	-	0	0	-	0	0	-	0	0	-	0	0	-	0	0	-	0	0	-
I	1154941	A-G	-	intron	null	0	0	-	0	0	-	0	0	-	0	0	-	0	0	-	0	0	-	0	0	-	0	0	-	0	0	-	0	0	-
I	1154988	A-G	-	intron	null	0	0	-	0	0	-	0	0	-	0	0	-	0	0	-	0	0	-	0	0	-	0	0	-	0	0	-	0	0	-
I	1154989	A-G	-	intron	null	0	0	-	0	0	-	0	0	-	0	0	-	0	0	-	0	0	-	0	0	-	0	0	-	0	0	-	0	0	-
I	1154990	A-G	-	intron	null	0	0	-	0	0	-	0	0	-	0	0	-	0	0	-	0	0	-	0	0	-	0	0	-	0	0	-	0	0	-
I	1154991	A-G	-	intron	null	0	0	-	0	0	-	0	0	-	0	0	-	0	0	-	0	0	-	0	0	-	0	0	-	0	0	-	0	0	-
I	1154999	A-G	-	intron	null	0	0	-	0	0	-	0	0	-	0	0	-	0	0	-	0	0	-	0	0	-	0	0	-	0	0	-	0	0	-
I	1155000	A-G	-	intron	null	0	0	-	0	0	-	0	0	-	0	0	-	0	0	-	0	0	-	0	0	-	0	0	-	0	0	-	0	0	-
I	1155008	A-G	-	intron	null	0	0	-	0	0	-	0	0	-	0	0	-	0	0	-	0	0	-	0	0	-	0	0	-	0	0	-	0	0	-
I	1155009	A-G	-	intron	null	0	0	-	0	0	-	0	0	-	0	0	-	0	0	-	0	0	-	0	0	-	0	0	-	0	0	-	0	0	-
I	1155023	A-G	-	intron	null	0	0	-	0	0	-	0	0	-	0	0	-	0	0	-	0	0	-	0	0	-	0	0	-	0	0	-	0	0	-
I	1155025	A-G	-	intron	null	0	0	-	0	0	-	0	0	-	0	0	-	0	0	-	0	0	-	0	0	-	0	0	-	0	0	-	0	0	-
I	1155036	A-G	-	intron	null	0	0	-	0	0	-	0	0	-	0	0	-	0	0	-	0	0	-	0	0	-	1	0	0	0	0	-	0	0	-
I	1155041	A-G	-	intron	null	0	0	-	0	0	-	0	0	-	0	0	-	0	0	-	0	0	-	0	0	-	1	0	0	0	0	-	0	0	-
I	1155042	A-G	-	intron	null	0	0	-	0	0	-	0	0	-	0	0	-	0	0	-	0	0	-	0	0	-	1	0	0	0	0	-	0	0	-
I	1155049	A-G	-	intron	null	0	0	-	0	0	-	0	0	-	0	0	-	0	0	-	0	0	-	0	0	-	1	0	0	0	0	-	0	0	-
I	1155058	A-G	-	intron	null	0	0	-	0	0	-	0	0	-	0	0	-	0	0	-	0	0	-	0	0	-	1	0	0	0	0	-	0	0	-
I	1155060	A-G	-	intron	null	0	0	-	0	0	-	0	0	-	0	0	-	0	0	-	0	0	-	0	0	-	1	0	0	0	0	-	0	0	-
I	1155062	A-G	-	intron	null	0	0	-	0	0	-	0	0	-	0	0	-	0	0	-	0	0	-	0	0	-	1	0	0	0	0	-	0	0	-
I	1155064	A-G	-	intron	null	0	0	-	0	0	-	0	0	-	0	0	-	0	0	-	0	0	-	0	0	-	1	0	0	0	0	-	0	0	-
I	1155067	A-G	-	intron	null	0	0	-	0	0	-	0	0	-	0	0	-	0	0	-	0	0	-	0	0	-	1	0	0	0	0	-	0	0	-
I	1155069	A-G	-	intron	null	0	0	-	0	0	-	0	0	-	0	0	-	0	0	-	0	0	-	0	0	-	1	0	0	0	0	-	0	0	-
I	1155070	A-G	-	intron	null	0	0	-	0	0	-	0	0	-	0	0	-	0	0	-	0	0	-	0	0	-	1	0	0	0	0	-	0	0	-
I	1155071	A-G	-	intron	null	0	0	-	0	0	-	0	0	-	0	0	-	0	0	-	0	0	-	0	0	-	1	0	0	0	0	-	0	0	-
I	1155082	A-G	-	intron	null	0	0	-	0	0	-	0	0	-	0	0	-	0	0	-	0	0	-	0	0	-	1	0	0	0	0	-	0	0	-
I	1155083	A-G	-	intron	null	0	0	-	0	0	-	0	0	-	0	0	-	0	0	-	0	0	-	0	0	-	1	0	0	0	0	-	0	0	-
I	1155087	A-G	-	intron	null	0	0	-	0	0	-	0	0	-	0	0	-	0	0	-	0	0	-	0	0	-	1	0	0	0	0	-	0	0	-
I	1155088	A-G	-	intron	null	0	0	-	0	0	-	0	0	-	0	0	-	0	0	-	0	0	-	0	0	-	1	0	0	0	0	-	0	0	-
I	1155089	A-G	-	intron	null	0	0	-	0	0	-	0	0	-	0	0	-	0	0	-	0	0	-	0	0	-	1	0	0	0	0	-	0	0	-
I	1155090	A-G	-	intron	null	0	0	-	0	0	-	0	0	-	0	0	-	0	0	-	0	0	-	0	0	-	1	0	0	0	0	-	0	0	-
I	1155092	A-G	-	intron	null	0	0	-	0	0	-	0	0	-	0	0	-	0	0	-	0	0	-	0	0	-	1	0	0	0	0	-	0	0	-
I	1155094	A-G	-	intron	null	0	0	-	0	0	-	0	0	-	0	0	-	0	0	-	0	0	-	0	0	-	1	0	0	0	0	-	0	0	-
I	1155100	A-G	-	intron	null	0	0	-	0	0	-	0	0	-	0	0	-	0	0	-	0	0	-	0	0	-	1	0	0	0	0	-	0	0	-
I	1155107	A-G	-	intron	null	0	0	-	0	0	-	0	0	-	0	0	-	0	0	-	0	0	-	1	0	0	1	0	0	0	0	-	0	0	-
I	1155110	A-G	-	intron	null	0	0	-	0	0	-	0	0	-	0	0	-	0	0	-	0	0	-	1	0	0	1	0	0	0	0	-	0	0	-
I	1155112	A-G	-	intron	null	0	0	-	0	0	-	0	0	-	0	0	-	0	0	-	0	0	-	1	0	0	1	0	0	0	0	-	0	0	-
I	1155113	A-G	-	intron	null	0	0	-	0	0	-	0	0	-	0	0	-	0	0	-	0	0	-	1	0	0	1	0	0	0	0	-	0	0	-
I	1155118	A-G	-	intron	null	0	0	-	0	0	-	0	0	-	0	0	-	0	0	-	0	0	-	1	0	0	0	0	-	0	0	-	0	0	-
I	1155127	A-G	-	intron	null	0	0	-	0	0	-	0	0	-	0	0	-	0	0	-	0	0	-	1	0	0	0	0	-	0	0	-	0	0	-
I	1155134	A-G	-	intron	null	0	0	-	0	0	-	0	0	-	0	0	-	0	0	-	0	0	-	1	0	0	0	0	-	0	0	-	0	0	-
I	1155137	A-G	-	intron	null	0	0	-	0	0	-	0	0	-	0	0	-	0	0	-	0	0	-	1	0	0	0	0	-	0	0	-	0	0	-
I	1155138	A-G	-	intron	null	0	0	-	0	0	-	0	0	-	0	0	-	0	0	-	0	0	-	1	0	0	1	0	0	0	0	-	0	0	-
I	1155145	A-G	-	intron	null	0	0	-	0	0	-	0	0	-	0	0	-	0	0	-	0	0	-	1	0	0	1	0	0	0	0	-	0	0	-
I	1155149	A-G	-	intron	null	0	0	-	0	0	-	0	0	-	0	0	-	0	0	-	0	0	-	1	0	0	1	0	0	0	0	-	0	0	-
I	1155159	A-G	-	intron	null	0	0	-	0	0	-	0	0	-	0	0	-	0	0	-	0	0	-	1	0	0	1	0	0	0	0	-	0	0	-
I	1155160	A-G	-	intron	null	0	0	-	0	0	-	0	0	-	0	0	-	0	0	-	0	0	-	1	0	0	1	0	0	0	0	-	0	0	-
I	1155164	A-G	-	intron	null	0	0	-	0	0	-	0	0	-	0	0	-	0	0	-	0	0	-	1	0	0	1	0	0	0	0	-	0	0	-
I	1155165	A-G	-	intron	null	0	0	-	0	0	-	0	0	-	0	0	-	0	0	-	0	0	-	1	0	0	1	0	0	0	0	-	0	0	-
I	1155171	A-G	-	intron	null	0	0	-	0	0	-	0	0	-	0	0	-	0	0	-	0	0	-	1	0	0	1	0	0	0	0	-	0	0	-
I	1155172	A-G	-	intron	null	0	0	-	0	0	-	0	0	-	0	0	-	0	0	-	0	0	-	1	0	0	1	0	0	0	0	-	0	0	-
I	1155175	A-G	-	intron	null	0	0	-	0	0	-	0	0	-	0	0	-	0	0	-	0	0	-	1	0	0	1	0	0	0	0	-	0	0	-
I	1155176	A-G	-	intron	null	0	0	-	0	0	-	0	0	-	0	0	-	0	0	-	0	0	-	1	0	0	1	0	0	0	0	-	0	0	-
I	1155177	A-G	-	intron	null	0	0	-	0	0	-	0	0	-	0	0	-	0	0	-	0	0	-	1	0	0	1	0	0	0	0	-	0	0	-
I	1155184	A-G	-	intron	null	0	0	-	0	0	-	0	0	-	0	0	-	0	0	-	0	0	-	1	0	0	1	0	0	0	0	-	0	0	-
I	1155195	A-G	-	intron	null	0	0	-	0	0	-	0	0	-	0	0	-	0	0	-	0	0	-	1	0	0	1	0	0	0	0	-	0	0	-
I	1155196	A-G	-	intron	null	0	0	-	0	0	-	0	0	-	0	0	-	0	0	-	0	0	-	1	0	0	1	0	0	0	0	-	0	0	-
I	1155197	A-G	-	intron	null	0	0	-	0	0	-	0	0	-	0	0	-	0	0	-	0	0	-	1	0	0	1	0	0	0	0	-	0	0	-
I	1155200	A-G	-	intron	null	0	0	-	0	0	-	0	0	-	0	0	-	0	0	-	0	0	-	1	0	0	1	0	0	0	0	-	0	0	-
I	1155201	A-G	-	intron	null	0	0	-	0	0	-	0	0	-	0	0	-	0	0	-	0	0	-	1	0	0	1	0	0	0	0	-	0	0	-
I	1155203	A-G	-	intron	null	0	0	-	0	0	-	0	0	-	0	0	-	0	0	-	0	0	-	1	0	0	1	0	0	0	0	-	0	0	-
I	1155210	A-G	-	intron	null	0	0	-	0	0	-	0	0	-	0	0	-	0	0	-	0	0	-	1	0	0	1	0	0	0	0	-	0	0	-
I	1155213	A-G	-	intron	null	0	0	-	0	0	-	0	0	-	0	0	-	0	0	-	0	0	-	1	0	0	1	0	0	0	0	-	0	0	-
I	1155235	A-G	-	intron	null	0	0	-	0	0	-	0	0	-	0	0	-	0	0	-	0	0	-	1	0	0	1	0	0	0	0	-	0	0	-
I	1155237	A-G	-	intron	null	0	0	-	0	0	-	0	0	-	0	0	-	0	0	-	0	0	-	1	0	0	1	0	0	0	0	-	0	0	-
I	1155275	A-G	-	intron	null	0	0	-	0	0	-	0	0	-	0	0	-	0	0	-	1	0	0	1	0	0	1	0	0	0	0	-	0	0	-
I	1155279	A-G	-	intron	null	0	0	-	0	0	-	0	0	-	0	0	-	0	0	-	1	0	0	1	0	0	1	0	0	0	0	-	0	0	-
I	1155280	A-G	-	intron	null	0	0	-	0	0	-	0	0	-	0	0	-	0	0	-	1	0	0	1	0	0	1	0	0	0	0	-	0	0	-
I	1155286	A-G	-	intron	null	0	0	-	0	0	-	0	0	-	0	0	-	0	0	-	1	0	0	0	0	-	1	0	0	0	0	-	0	0	-
I	1155292	A-G	-	intron	null	0	0	-	0	0	-	0	0	-	0	0	-	0	0	-	1	0	0	0	0	-	1	0	0	0	0	-	0	0	-
I	1155293	A-G	-	intron	null	0	0	-	0	0	-	0	0	-	0	0	-	0	0	-	1	0	0	0	0	-	1	0	0	0	0	-	0	0	-
I	1155303	A-G	-	intron	null	0	0	-	0	0	-	0	0	-	0	0	-	0	0	-	1	0	0	0	0	-	1	0	0	0	0	-	0	0	-
I	1155310	A-G	-	intron	null	0	0	-	0	0	-	0	0	-	0	0	-	0	0	-	1	0	0	0	0	-	1	0	0	0	0	-	0	0	-
I	1155315	A-G	-	intron	null	0	0	-	0	0	-	0	0	-	0	0	-	0	0	-	1	0	0	0	0	-	1	0	0	0	0	-	0	0	-
I	1155325	A-G	-	intron	null	0	0	-	0	0	-	0	0	-	0	0	-	0	0	-	1	0	0	0	0	-	1	0	0	0	0	-	0	0	-
I	1155331	A-G	-	intron	null	0	0	-	0	0	-	0	0	-	0	0	-	0	0	-	1	0	0	0	0	-	1	0	0	0	0	-	0	0	-
I	1155338	A-G	-	intron	null	0	0	-	0	0	-	0	0	-	0	0	-	0	0	-	2	0	0	0	0	-	1	0	0	0	0	-	0	0	-
I	11577314	A-G	-	intron	F15D3.6	0	0	-	1	0	0	0	0	-	0	0	-	0	0	-	0	0	-	0	0	-	0	0	-	0	0	-	0	0	-
I	11589954	A-G	-	integenic	-	0	0	-	0	0	-	0	0	-	0	0	-	0	0	-	0	0	-	0	0	-	0	0	-	0	0	-	0	0	-
I	11589955	A-G	-	integenic	-	0	0	-	0	0	-	0	0	-	0	0	-	0	0	-	0	0	-	0	0	-	0	0	-	0	0	-	0	0	-
I	11596819	A-G	+	intron	C17D12.2	0	0	-	4	2	0.5	0	0	-	0	0	-	0	0	-	1	0	0	0	0	-	4	1	0.25	0	0	-	0	0	-
I	11598034	A-G	+	intron	C17D12.2	0	0	-	0	0	-	0	0	-	1	0	0	0	0	-	0	0	-	1	1	1	3	3	1	0	0	-	0	0	-
I	11598790	A-G	+	intron	C17D12.2	0	0	-	2	2	1	0	0	-	0	0	-	0	0	-	0	0	-	0	0	-	0	0	-	0	0	-	0	0	-
I	11598791	A-G	+	intron	C17D12.2	0	0	-	2	2	1	0	0	-	0	0	-	0	0	-	0	0	-	0	0	-	0	0	-	0	0	-	0	0	-
I	11600106	A-G	+	intron	C17D12.2	1	0	0	1	1	1	0	0	-	0	0	-	0	0	-	0	0	-	0	0	-	5	3	0.6	0	0	-	0	0	-
I	11600123	A-G	+	intron	C17D12.2	1	0	0	1	1	1	0	0	-	0	0	-	0	0	-	0	0	-	0	0	-	6	2	0.333333	0	0	-	0	0	-
I	11601003	A-G	+	intron	C17D12.2	0	0	-	2	0	0	3	0	0	1	0	0	0	0	-	1	0	0	3	1	0.333333	7	2	0.285714	0	0	-	0	0	-
I	11601007	A-G	+	intron	C17D12.2	0	0	-	2	0	0	3	0	0	1	0	0	0	0	-	1	0	0	3	1	0.333333	7	1	0.142857	0	0	-	0	0	-
I	11601020	A-G	+	intron	C17D12.2	2	0	0	4	0	0	4	1	0.25	1	0	0	0	0	-	1	0	0	3	0	0	8	3	0.375	0	0	-	0	0	-
I	11601025	A-G	+	intron	C17D12.2	2	0	0	4	0	0	4	0	0	1	1	1	0	0	-	1	1	1	3	1	0.333333	8	3	0.375	0	0	-	0	0	-
I	11601061	A-G	+	intron	C17D12.2	6	0	0	6	0	0	3	0	0	1	0	0	0	0	-	1	0	0	1	0	0	11	3	0.272727	1	0	0	0	0	-
I	11601069	A-G	+	intron	C17D12.2	6	0	0	6	0	0	3	0	0	1	0	0	0	0	-	1	0	0	1	0	0	9	2	0.222222	1	0	0	0	0	-
I	11603046	A-G	+	downstream	C17D12.2	6	4	0.666667	1	1	1	0	0	-	0	0	-	0	0	-	0	0	-	4	2	0.5	6	6	1	1	1	1	0	0	-
I	11603047	A-G	+	downstream	C17D12.2	6	3	0.5	1	0	0	0	0	-	0	0	-	0	0	-	0	0	-	4	3	0.75	6	5	0.833333	1	0	0	0	0	-
I	11603059	A-G	+	downstream	C17D12.2	7	2	0.285714	1	0	0	0	0	-	0	0	-	0	0	-	0	0	-	4	0	0	6	0	0	0	0	-	0	0	-
I	11603064	A-G	+	downstream	C17D12.2	7	2	0.285714	1	0	0	0	0	-	0	0	-	0	0	-	0	0	-	4	0	0	6	0	0	1	0	0	0	0	-
I	11603111	A-G	+	downstream	null	48	15	0.3125	27	9	0.333333	19	8	0.421053	5	1	0.2	0	0	-	8	3	0.375	15	0	0	40	1	0.025	7	0	0	0	0	-
I	11603125	A-G	+	downstream	null	57	4	0.0701754	29	3	0.103448	22	0	0	7	1	0.142857	0	0	-	8	2	0.25	18	0	0	50	0	0	8	1	0.125	0	0	-
I	11603133	A-G	+	downstream	null	61	25	0.409836	31	18	0.580645	24	9	0.375	8	4	0.5	0	0	-	9	3	0.333333	22	2	0.0909091	50	17	0.34	10	2	0.2	1	0	0
I	11603139	A-G	+	downstream	null	61	2	0.0327869	32	2	0.0625	24	1	0.0416667	8	0	0	0	0	-	9	0	0	23	0	0	53	8	0.150943	9	1	0.111111	1	0	0
I	11603150	A-G	+	downstream	null	66	65	0.984848	33	33	1	28	27	0.964286	8	8	1	0	0	-	9	9	1	25	24	0.96	65	60	0.923077	11	10	0.909091	1	1	1
I	11603151	A-G	+	downstream	null	66	9	0.136364	34	3	0.0882353	27	1	0.037037	8	0	0	0	0	-	9	1	0.111111	25	3	0.12	65	8	0.123077	11	3	0.272727	1	0	0
I	11603302	A-G	+	downstream	null	23	6	0.26087	6	5	0.833333	5	1	0.2	2	2	1	0	0	-	1	0	0	10	2	0.2	20	3	0.15	3	0	0	0	0	-
I	11603303	A-G	+	downstream	null	23	6	0.26087	6	4	0.666667	5	0	0	2	2	1	0	0	-	1	0	0	11	2	0.181818	20	2	0.1	3	0	0	0	0	-
I	11603304	A-G	+	downstream	null	22	0	0	6	2	0.333333	4	0	0	2	1	0.5	0	0	-	1	0	0	11	0	0	20	2	0.1	3	0	0	0	0	-
I	11603305	A-G	+	downstream	null	21	4	0.190476	6	3	0.5	4	2	0.5	2	2	1	0	0	-	1	0	0	11	0	0	19	6	0.315789	3	0	0	0	0	-
I	11603306	A-G	+	downstream	null	22	1	0.0454545	6	2	0.333333	4	0	0	1	0	0	0	0	-	1	0	0	11	0	0	20	1	0.05	3	0	0	0	0	-
I	11603307	A-G	+	downstream	null	22	0	0	6	2	0.333333	4	0	0	2	1	0.5	0	0	-	1	0	0	11	0	0	20	1	0.05	3	0	0	0	0	-
I	11603332	A-G	+	downstream	null	27	19	0.703704	9	8	0.888889	4	2	0.5	3	3	1	2	1	0.5	0	0	-	26	10	0.384615	22	10	0.454545	6	2	0.333333	0	0	-
I	11603333	A-G	+	downstream	null	25	7	0.28	9	6	0.666667	4	2	0.5	3	2	0.666667	2	0	0	0	0	-	26	4	0.153846	22	3	0.136364	6	0	0	0	0	-
I	11603334	A-G	+	downstream	null	25	17	0.68	8	7	0.875	4	3	0.75	3	3	1	2	1	0.5	1	1	1	27	11	0.407407	22	10	0.454545	6	1	0.166667	0	0	-
I	11603339	A-G	+	downstream	null	26	12	0.461538	10	9	0.9	4	2	0.5	3	3	1	2	2	1	1	1	1	26	11	0.423077	22	13	0.590909	6	1	0.166667	0	0	-
I	11603340	A-G	+	downstream	null	27	9	0.333333	10	7	0.7	4	0	0	3	0	0	2	0	0	1	1	1	27	6	0.222222	22	8	0.363636	6	1	0.166667	0	0	-
I	11603347	A-G	-	downstream	C17D12.7	33	0	0	14	0	0	7	0	0	3	0	0	2	0	0	1	0	0	31	0	0	27	0	0	5	0	0	0	0	-
I	11603348	A-G	+	downstream	null	34	1	0.0294118	14	4	0.285714	8	2	0.25	3	1	0.333333	2	1	0.5	1	0	0	32	2	0.0625	28	1	0.0357143	5	0	0	0	0	-
I	11603422	A-G	+	downstream	null	78	2	0.025641	20	4	0.2	24	2	0.0833333	9	1	0.111111	3	0	0	2	0	0	43	0	0	51	2	0.0392157	14	0	0	1	0	0
I	11603425	A-G	+	downstream	null	83	13	0.156627	25	9	0.36	25	6	0.24	10	4	0.4	3	1	0.333333	3	1	0.333333	47	6	0.12766	57	12	0.210526	16	3	0.1875	1	0	0
I	11603427	A-G	+	downstream	null	83	13	0.156627	28	7	0.25	25	3	0.12	10	3	0.3	3	0	0	3	2	0.666667	50	1	0.02	55	1	0.0181818	15	0	0	1	0	0
I	11603444	A-G	+	downstream	null	133	15	0.112782	57	10	0.175439	43	6	0.139535	17	4	0.235294	5	1	0.2	7	0	0	79	13	0.164557	91	19	0.208791	27	3	0.111111	5	3	0.6
I	11603445	A-G	+	downstream	null	136	35	0.257353	58	16	0.275862	44	12	0.272727	16	5	0.3125	5	0	0	8	1	0.125	80	23	0.2875	95	31	0.326316	27	6	0.222222	5	3	0.6
I	11603446	A-G	+	downstream	null	136	1	0.00735294	58	7	0.12069	43	0	0	17	0	0	5	0	0	8	0	0	79	2	0.0253165	94	5	0.0531915	26	0	0	5	0	0
I	11603447	A-G	+	downstream	null	138	3	0.0217391	58	1	0.0172414	44	0	0	18	1	0.0555556	5	0	0	8	1	0.125	80	0	0	95	6	0.0631579	27	0	0	5	1	0.2
I	11603472	A-G	+	downstream	null	179	73	0.407821	73	47	0.643836	57	26	0.45614	21	9	0.428571	7	3	0.428571	9	4	0.444444	88	22	0.25	99	22	0.222222	36	3	0.0833333	5	2	0.4
I	11603473	A-G	+	downstream	null	179	18	0.100559	73	7	0.0958904	57	4	0.0701754	21	2	0.0952381	7	1	0.142857	9	0	0	88	1	0.0113636	101	0	0	37	0	0	5	0	0
I	11603481	A-G	+	downstream	null	181	4	0.0220994	74	6	0.0810811	57	1	0.0175439	21	0	0	7	0	0	9	1	0.111111	88	0	0	98	1	0.0102041	38	0	0	5	0	0
I	11603624	A-G	+	downstream	null	65	2	0.0307692	25	2	0.08	13	1	0.0769231	7	0	0	3	0	0	2	0	0	28	1	0.0357143	26	2	0.0769231	17	2	0.117647	0	0	-
I	11603625	A-G	+	downstream	null	63	1	0.015873	21	0	0	13	0	0	7	0	0	3	0	0	2	0	0	25	0	0	27	5	0.185185	15	0	0	0	0	-
I	11603626	A-G	+	downstream	null	62	0	0	21	0	0	13	0	0	7	0	0	3	0	0	2	1	0.5	25	1	0.04	27	3	0.111111	15	0	0	0	0	-
I	11603627	A-G	+	downstream	null	61	15	0.245902	18	7	0.388889	13	2	0.153846	7	0	0	3	0	0	2	1	0.5	24	12	0.5	25	15	0.6	15	11	0.733333	0	0	-
I	11603635	A-G	+	downstream	null	58	0	0	19	1	0.0526316	13	0	0	7	0	0	2	0	0	2	0	0	23	5	0.217391	28	3	0.107143	15	3	0.2	0	0	-
I	11603639	A-G	-	downstream	C17D12.7	56	0	0	18	0	0	13	0	0	7	0	0	2	0	0	2	0	0	21	0	0	26	0	0	13	0	0	0	0	-
I	11603640	A-G	+	downstream	null	56	9	0.160714	18	3	0.166667	13	0	0	7	3	0.428571	2	1	0.5	2	2	1	20	3	0.15	24	10	0.416667	13	1	0.0769231	0	0	-
I	11603641	A-G	+	downstream	null	56	6	0.107143	18	1	0.0555556	13	1	0.0769231	7	0	0	2	1	0.5	2	0	0	20	3	0.15	25	3	0.12	13	1	0.0769231	0	0	-
I	11603649	A-G	+	downstream	null	6	0	0	4	0	0	3	0	0	3	0	0	0	0	-	0	0	-	9	0	0	18	2	0.111111	2	0	0	0	0	-
I	11603723	A-G	+	downstream	null	70	1	0.0142857	31	3	0.0967742	23	0	0	5	1	0.2	0	0	-	6	0	0	40	0	0	120	3	0.025	9	0	0	0	0	-
I	11603728	A-G	+	downstream	null	70	1	0.0142857	31	3	0.0967742	24	0	0	5	0	0	0	0	-	6	0	0	41	0	0	119	7	0.0588235	9	0	0	0	0	-
I	11603745	A-G	+	downstream	null	111	29	0.261261	60	20	0.333333	40	8	0.2	9	3	0.333333	1	1	1	8	3	0.375	69	28	0.405797	160	91	0.56875	15	7	0.466667	3	3	1
I	11603746	A-G	+	downstream	null	113	16	0.141593	60	12	0.2	40	5	0.125	9	2	0.222222	1	0	0	8	1	0.125	69	27	0.391304	163	84	0.515337	16	5	0.3125	3	3	1
I	11603747	A-G	+	downstream	null	113	1	0.00884956	61	0	0	41	1	0.0243902	9	0	0	1	0	0	8	1	0.125	70	3	0.0428571	163	12	0.0736196	17	0	0	3	0	0
I	11603748	A-G	+	downstream	null	114	3	0.0263158	63	5	0.0793651	41	2	0.0487805	9	0	0	1	0	0	8	0	0	71	6	0.084507	163	24	0.147239	17	0	0	3	0	0
I	11603764	A-G	+	downstream	null	132	23	0.174242	72	34	0.472222	43	10	0.232558	12	1	0.0833333	1	1	1	8	3	0.375	82	49	0.597561	156	108	0.692308	18	9	0.5	3	3	1
I	11603765	A-G	+	downstream	null	133	6	0.0451128	72	23	0.319444	43	7	0.162791	13	0	0	1	0	0	8	1	0.125	83	33	0.39759	158	92	0.582278	19	4	0.210526	3	1	0.333333
I	11603767	A-G	+	downstream	null	135	2	0.0148148	69	6	0.0869565	44	3	0.0681818	13	0	0	1	0	0	8	0	0	84	3	0.0357143	152	25	0.164474	19	0	0	3	0	0
I	11604337	A-G	-	downstream	C17D12.7	0	0	-	0	0	-	0	0	-	0	0	-	0	0	-	0	0	-	0	0	-	0	0	-	0	0	-	0	0	-
I	11604347	A-G	-	downstream	C17D12.7	0	0	-	0	0	-	0	0	-	0	0	-	0	0	-	0	0	-	0	0	-	0	0	-	0	0	-	0	0	-
I	11604443	A-G	-	downstream	C17D12.7	0	0	-	0	0	-	0	0	-	0	0	-	0	0	-	0	0	-	0	0	-	0	0	-	0	0	-	0	0	-
I	11604448	A-G	-	downstream	C17D12.7	0	0	-	0	0	-	0	0	-	0	0	-	0	0	-	0	0	-	0	0	-	0	0	-	0	0	-	0	0	-
I	11606007	A-G	-	intron	C17D12.7	0	0	-	0	0	-	0	0	-	0	0	-	0	0	-	0	0	-	0	0	-	0	0	-	0	0	-	0	0	-
I	11606008	A-G	-	intron	C17D12.7	0	0	-	0	0	-	0	0	-	0	0	-	0	0	-	0	0	-	0	0	-	0	0	-	0	0	-	0	0	-
I	1161151	A-G	+	intron	Y48G8AL.7	0	0	-	0	0	-	0	0	-	0	0	-	0	0	-	0	0	-	0	0	-	1	1	1	0	0	-	1	1	1
I	11612857	A-G	+	intron	C17D12.1	1	0	0	2	1	0.5	0	0	-	0	0	-	0	0	-	1	1	1	0	0	-	0	0	-	0	0	-	1	1	1
I	1161501	A-G	+	intron	Y48G8AL.7	0	0	-	0	0	-	1	1	1	0	0	-	0	0	-	0	0	-	1	1	1	0	0	-	1	1	1	0	0	-
I	1161502	A-G	+	intron	Y48G8AL.7	0	0	-	0	0	-	1	1	1	0	0	-	0	0	-	0	0	-	1	1	1	0	0	-	1	1	1	0	0	-
I	1161517	A-G	+	intron	Y48G8AL.7	0	0	-	0	0	-	1	1	1	0	0	-	0	0	-	0	0	-	1	1	1	0	0	-	1	1	1	0	0	-
I	1161587	A-G	+	intron	Y48G8AL.7	0	0	-	0	0	-	1	1	1	0	0	-	0	0	-	1	1	1	2	1	0.5	0	0	-	2	1	0.5	0	0	-
I	1161588	A-G	+	intron	Y48G8AL.7	0	0	-	0	0	-	1	0	0	0	0	-	0	0	-	1	1	1	2	2	1	0	0	-	2	2	1	0	0	-
I	1161614	A-G	+	intron	Y48G8AL.7	0	0	-	0	0	-	1	1	1	0	0	-	0	0	-	1	1	1	2	2	1	0	0	-	2	1	0.5	0	0	-
I	1161615	A-G	+	intron	Y48G8AL.7	0	0	-	0	0	-	1	1	1	0	0	-	0	0	-	1	0	0	2	1	0.5	0	0	-	2	1	0.5	0	0	-
I	1161620	A-G	+	intron	Y48G8AL.7	0	0	-	0	0	-	1	0	0	0	0	-	0	0	-	1	0	0	2	1	0.5	0	0	-	2	1	0.5	0	0	-
I	1161625	A-G	+	intron	Y48G8AL.7	0	0	-	0	0	-	1	1	1	0	0	-	0	0	-	1	1	1	2	2	1	0	0	-	2	2	1	0	0	-
I	1161626	A-G	+	intron	Y48G8AL.7	0	0	-	0	0	-	1	1	1	0	0	-	0	0	-	1	1	1	2	1	0.5	0	0	-	2	2	1	0	0	-
I	1161633	A-G	+	intron	Y48G8AL.7	0	0	-	0	0	-	1	1	1	0	0	-	0	0	-	1	1	1	2	0	0	0	0	-	2	0	0	0	0	-
I	1161639	A-G	+	intron	Y48G8AL.7	0	0	-	0	0	-	1	0	0	0	0	-	0	0	-	1	0	0	2	2	1	0	0	-	2	1	0.5	0	0	-
I	1161640	A-G	+	intron	Y48G8AL.7	0	0	-	0	0	-	1	0	0	0	0	-	0	0	-	1	0	0	2	1	0.5	0	0	-	2	1	0.5	0	0	-
I	1161644	A-G	+	intron	Y48G8AL.7	0	0	-	0	0	-	1	1	1	0	0	-	0	0	-	1	0	0	2	1	0.5	0	0	-	2	1	0.5	0	0	-
I	1162058	A-G	-	intron	null	0	0	-	0	0	-	0	0	-	0	0	-	0	0	-	0	0	-	0	0	-	0	0	-	0	0	-	0	0	-
I	1163779	A-G	+	downstream	Y48G8AL.7	1	1	1	2	2	1	0	0	-	0	0	-	0	0	-	0	0	-	0	0	-	0	0	-	0	0	-	0	0	-
I	1163828	A-G	+	downstream	Y48G8AL.7	2	2	1	2	1	0.5	0	0	-	0	0	-	0	0	-	0	0	-	0	0	-	0	0	-	0	0	-	0	0	-
I	1163856	A-G	+	downstream	Y48G8AL.7	2	1	0.5	2	2	1	0	0	-	0	0	-	0	0	-	0	0	-	0	0	-	0	0	-	0	0	-	0	0	-
I	1163888	A-G	-	intron	Y48G8AL.11	2	0	0	2	0	0	0	0	-	0	0	-	0	0	-	0	0	-	0	0	-	0	0	-	0	0	-	0	0	-
I	1163959	A-G	-	intron	Y48G8AL.11	1	0	0	0	0	-	0	0	-	0	0	-	0	0	-	0	0	-	0	0	-	0	0	-	0	0	-	0	0	-
I	1163992	A-G	-	intron	Y48G8AL.11	0	0	-	0	0	-	0	0	-	0	0	-	0	0	-	0	0	-	0	0	-	0	0	-	0	0	-	0	0	-
I	1163993	A-G	-	intron	Y48G8AL.11	0	0	-	0	0	-	0	0	-	0	0	-	0	0	-	0	0	-	0	0	-	0	0	-	0	0	-	0	0	-
I	1163994	A-G	-	intron	Y48G8AL.11	0	0	-	0	0	-	0	0	-	0	0	-	0	0	-	0	0	-	0	0	-	0	0	-	0	0	-	0	0	-
I	1164007	A-G	-	intron	Y48G8AL.11	0	0	-	0	0	-	0	0	-	0	0	-	0	0	-	0	0	-	0	0	-	0	0	-	0	0	-	0	0	-
I	1164855	A-G	-	intron	Y48G8AL.11	0	0	-	0	0	-	0	0	-	0	0	-	0	0	-	0	0	-	0	0	-	0	0	-	0	0	-	0	0	-
I	1164899	A-G	-	intron	Y48G8AL.11	0	0	-	0	0	-	0	0	-	0	0	-	0	0	-	0	0	-	0	0	-	0	0	-	0	0	-	0	0	-
I	1164908	A-G	-	intron	Y48G8AL.11	0	0	-	0	0	-	0	0	-	0	0	-	0	0	-	0	0	-	0	0	-	0	0	-	0	0	-	0	0	-
I	1164918	A-G	-	intron	Y48G8AL.11	0	0	-	0	0	-	0	0	-	0	0	-	0	0	-	0	0	-	0	0	-	0	0	-	0	0	-	0	0	-
I	1164919	A-G	-	intron	Y48G8AL.11	0	0	-	0	0	-	0	0	-	0	0	-	0	0	-	0	0	-	0	0	-	0	0	-	0	0	-	0	0	-
I	1164926	A-G	-	intron	Y48G8AL.11	0	0	-	0	0	-	0	0	-	0	0	-	0	0	-	0	0	-	0	0	-	0	0	-	0	0	-	0	0	-
I	1164929	A-G	-	intron	Y48G8AL.11	0	0	-	0	0	-	0	0	-	0	0	-	0	0	-	0	0	-	0	0	-	0	0	-	0	0	-	0	0	-
I	1164935	A-G	-	intron	Y48G8AL.11	0	0	-	0	0	-	0	0	-	0	0	-	0	0	-	0	0	-	0	0	-	0	0	-	0	0	-	0	0	-
I	1164936	A-G	-	intron	Y48G8AL.11	0	0	-	0	0	-	0	0	-	0	0	-	0	0	-	0	0	-	0	0	-	0	0	-	0	0	-	0	0	-
I	1164937	A-G	-	intron	Y48G8AL.11	0	0	-	0	0	-	0	0	-	0	0	-	0	0	-	0	0	-	0	0	-	0	0	-	0	0	-	0	0	-
I	1164939	A-G	-	intron	Y48G8AL.11	0	0	-	0	0	-	0	0	-	0	0	-	0	0	-	0	0	-	0	0	-	0	0	-	0	0	-	0	0	-
I	1164966	A-G	-	intron	Y48G8AL.11	0	0	-	0	0	-	0	0	-	0	0	-	0	0	-	0	0	-	0	0	-	0	0	-	0	0	-	0	0	-
I	1164967	A-G	-	intron	Y48G8AL.11	0	0	-	0	0	-	0	0	-	0	0	-	0	0	-	0	0	-	0	0	-	0	0	-	0	0	-	0	0	-
I	1164977	A-G	-	intron	Y48G8AL.11	0	0	-	0	0	-	0	0	-	0	0	-	0	0	-	0	0	-	0	0	-	0	0	-	0	0	-	0	0	-
I	1164978	A-G	-	intron	Y48G8AL.11	0	0	-	0	0	-	0	0	-	0	0	-	0	0	-	0	0	-	0	0	-	0	0	-	0	0	-	0	0	-
I	1164986	A-G	-	intron	Y48G8AL.11	0	0	-	0	0	-	0	0	-	0	0	-	0	0	-	0	0	-	0	0	-	0	0	-	0	0	-	0	0	-
I	1164987	A-G	-	intron	Y48G8AL.11	0	0	-	0	0	-	0	0	-	0	0	-	0	0	-	0	0	-	0	0	-	0	0	-	0	0	-	0	0	-
I	1164990	A-G	-	intron	Y48G8AL.11	0	0	-	0	0	-	0	0	-	0	0	-	0	0	-	0	0	-	0	0	-	0	0	-	0	0	-	0	0	-
I	1164991	A-G	-	intron	Y48G8AL.11	0	0	-	0	0	-	0	0	-	0	0	-	0	0	-	0	0	-	0	0	-	0	0	-	0	0	-	0	0	-
I	1164992	A-G	-	intron	Y48G8AL.11	0	0	-	0	0	-	0	0	-	0	0	-	0	0	-	0	0	-	0	0	-	0	0	-	0	0	-	0	0	-
I	1164995	A-G	-	intron	Y48G8AL.11	0	0	-	0	0	-	0	0	-	0	0	-	0	0	-	0	0	-	0	0	-	0	0	-	0	0	-	0	0	-
I	1164996	A-G	-	intron	Y48G8AL.11	0	0	-	0	0	-	0	0	-	0	0	-	0	0	-	0	0	-	0	0	-	0	0	-	0	0	-	0	0	-
I	1165000	A-G	-	intron	Y48G8AL.11	0	0	-	0	0	-	0	0	-	0	0	-	0	0	-	0	0	-	0	0	-	0	0	-	0	0	-	0	0	-
I	1165001	A-G	-	intron	Y48G8AL.11	0	0	-	0	0	-	0	0	-	0	0	-	0	0	-	0	0	-	0	0	-	0	0	-	0	0	-	0	0	-
I	1165028	A-G	-	intron	Y48G8AL.11	0	0	-	0	0	-	0	0	-	0	0	-	0	0	-	0	0	-	0	0	-	0	0	-	0	0	-	0	0	-
I	1165038	A-G	-	intron	Y48G8AL.11	0	0	-	0	0	-	0	0	-	0	0	-	0	0	-	0	0	-	0	0	-	0	0	-	0	0	-	0	0	-
I	1165247	A-G	-	intron	Y48G8AL.11	0	0	-	0	0	-	0	0	-	0	0	-	0	0	-	0	0	-	0	0	-	0	0	-	0	0	-	0	0	-
I	11668111	A-G	+	noncoding	F11A6.5	12	2	0.166667	4	2	0.5	2	0	0	0	0	-	0	0	-	1	0	0	2	0	0	0	0	-	0	0	-	0	0	-
I	11669975	A-G	+	upstream	F11A6.10	4	4	1	0	0	-	0	0	-	0	0	-	0	0	-	0	0	-	0	0	-	2	2	1	0	0	-	1	1	1
I	11669981	A-G	+	noncoding	F11A6.10	4	0	0	0	0	-	0	0	-	0	0	-	0	0	-	0	0	-	0	0	-	3	2	0.666667	0	0	-	1	0	0
I	11670010	A-G	+	noncoding	F11A6.10	8	8	1	0	0	-	0	0	-	1	1	1	0	0	-	0	0	-	1	0	0	4	4	1	1	1	1	1	1	1
I	11670011	A-G	+	noncoding	F11A6.10	8	7	0.875	0	0	-	0	0	-	1	0	0	0	0	-	0	0	-	1	0	0	4	1	0.25	1	0	0	1	0	0
I	11670012	A-G	+	noncoding	F11A6.10	8	4	0.5	0	0	-	0	0	-	1	0	0	0	0	-	0	0	-	1	0	0	5	0	0	1	0	0	1	0	0
I	11670048	A-G	+	noncoding	F11A6.10	13	12	0.923077	1	1	1	1	1	1	1	1	1	0	0	-	0	0	-	1	0	0	5	2	0.4	1	0	0	1	0	0
I	11670056	A-G	+	noncoding	F11A6.10	14	2	0.142857	2	1	0.5	1	0	0	1	1	1	0	0	-	0	0	-	1	0	0	5	2	0.4	1	0	0	1	1	1
I	11670062	A-G	+	noncoding	F11A6.10	13	5	0.384615	2	2	1	1	1	1	1	1	1	0	0	-	0	0	-	1	0	0	5	3	0.6	1	0	0	1	0	0
I	11670063	A-G	+	noncoding	F11A6.10	13	1	0.0769231	2	0	0	1	0	0	1	0	0	0	0	-	0	0	-	1	0	0	5	2	0.4	1	0	0	1	0	0
I	11670082	A-G	+	noncoding	F11A6.10	14	6	0.428571	3	1	0.333333	1	1	1	1	0	0	0	0	-	0	0	-	1	0	0	6	2	0.333333	1	0	0	1	0	0
I	11670083	A-G	+	noncoding	F11A6.10	14	7	0.5	3	3	1	1	1	1	1	1	1	0	0	-	0	0	-	1	0	0	6	1	0.166667	1	0	0	1	0	0
I	11670084	A-G	+	noncoding	F11A6.10	14	0	0	3	1	0.333333	1	0	0	1	0	0	0	0	-	0	0	-	1	0	0	6	2	0.333333	1	1	1	2	1	0.5
I	11670085	A-G	+	noncoding	F11A6.10	14	6	0.428571	3	0	0	1	0	0	1	1	1	0	0	-	0	0	-	1	0	0	6	1	0.166667	1	0	0	2	0	0
I	11670088	A-G	+	downstream	F11A6.10	14	2	0.142857	3	0	0	1	0	0	1	0	0	0	0	-	0	0	-	1	0	0	6	0	0	1	0	0	2	0	0
I	11677731	A-G	+	intron	F11A6.1	1	1	1	0	0	-	0	0	-	0	0	-	0	0	-	0	0	-	0	0	-	2	2	1	0	0	-	0	0	-
I	1168289	A-G	-	intron	Y48G8AL.11	0	0	-	0	0	-	0	0	-	0	0	-	0	0	-	0	0	-	0	0	-	0	0	-	0	0	-	0	0	-
I	1168292	A-G	-	intron	Y48G8AL.11	0	0	-	0	0	-	0	0	-	0	0	-	0	0	-	0	0	-	0	0	-	0	0	-	0	0	-	0	0	-
I	11682955	A-G	-	upstream	F11A6.2	0	0	-	0	0	-	0	0	-	0	0	-	0	0	-	0	0	-	0	0	-	0	0	-	0	0	-	0	0	-
I	11682956	A-G	-	upstream	F11A6.2	0	0	-	0	0	-	0	0	-	0	0	-	0	0	-	0	0	-	0	0	-	0	0	-	0	0	-	0	0	-
I	1168302	A-G	-	intron	Y48G8AL.11	0	0	-	0	0	-	0	0	-	0	0	-	0	0	-	0	0	-	0	0	-	0	0	-	0	0	-	0	0	-
I	1168313	A-G	-	intron	Y48G8AL.11	0	0	-	0	0	-	0	0	-	0	0	-	0	0	-	0	0	-	0	0	-	0	0	-	0	0	-	0	0	-
I	1168314	A-G	-	intron	Y48G8AL.11	0	0	-	0	0	-	0	0	-	0	0	-	0	0	-	0	0	-	0	0	-	0	0	-	0	0	-	0	0	-
I	1168315	A-G	-	intron	Y48G8AL.11	0	0	-	0	0	-	0	0	-	0	0	-	0	0	-	0	0	-	0	0	-	0	0	-	0	0	-	0	0	-
I	1168323	A-G	-	intron	Y48G8AL.11	0	0	-	0	0	-	0	0	-	0	0	-	0	0	-	0	0	-	0	0	-	0	0	-	0	0	-	0	0	-
I	1168337	A-G	-	intron	Y48G8AL.11	0	0	-	0	0	-	0	0	-	0	0	-	0	0	-	0	0	-	0	0	-	0	0	-	0	0	-	0	0	-
I	1168338	A-G	-	intron	Y48G8AL.11	0	0	-	0	0	-	0	0	-	0	0	-	0	0	-	0	0	-	0	0	-	0	0	-	0	0	-	0	0	-
I	1168350	A-G	-	intron	Y48G8AL.11	0	0	-	0	0	-	0	0	-	0	0	-	0	0	-	0	0	-	0	0	-	0	0	-	0	0	-	0	0	-
I	1168376	A-G	-	intron	Y48G8AL.11	0	0	-	0	0	-	0	0	-	0	0	-	0	0	-	0	0	-	0	0	-	0	0	-	0	0	-	0	0	-
I	1168378	A-G	-	intron	Y48G8AL.11	0	0	-	0	0	-	0	0	-	0	0	-	0	0	-	0	0	-	0	0	-	0	0	-	0	0	-	0	0	-
I	1168516	A-G	-	intron	Y48G8AL.11	0	0	-	0	0	-	0	0	-	0	0	-	0	0	-	0	0	-	0	0	-	0	0	-	0	0	-	0	0	-
I	1168517	A-G	-	intron	Y48G8AL.11	0	0	-	0	0	-	0	0	-	0	0	-	0	0	-	0	0	-	0	0	-	0	0	-	0	0	-	0	0	-
I	1168518	A-G	-	intron	Y48G8AL.11	0	0	-	0	0	-	0	0	-	0	0	-	0	0	-	0	0	-	0	0	-	0	0	-	0	0	-	0	0	-
I	1168519	A-G	-	intron	Y48G8AL.11	0	0	-	0	0	-	0	0	-	0	0	-	0	0	-	0	0	-	0	0	-	0	0	-	0	0	-	0	0	-
I	1168529	A-G	-	intron	Y48G8AL.11	0	0	-	0	0	-	0	0	-	0	0	-	0	0	-	0	0	-	0	0	-	0	0	-	0	0	-	0	0	-
I	1168532	A-G	-	intron	Y48G8AL.11	0	0	-	0	0	-	0	0	-	0	0	-	0	0	-	0	0	-	0	0	-	0	0	-	0	0	-	0	0	-
I	1168573	A-G	-	intron	Y48G8AL.11	0	0	-	0	0	-	0	0	-	0	0	-	0	0	-	0	0	-	0	0	-	0	0	-	0	0	-	0	0	-
I	1168574	A-G	-	intron	Y48G8AL.11	0	0	-	0	0	-	0	0	-	0	0	-	0	0	-	0	0	-	0	0	-	0	0	-	0	0	-	0	0	-
I	1168590	A-G	-	intron	Y48G8AL.11	0	0	-	0	0	-	0	0	-	0	0	-	0	0	-	0	0	-	0	0	-	0	0	-	0	0	-	0	0	-
I	1168596	A-G	-	intron	Y48G8AL.11	0	0	-	0	0	-	0	0	-	0	0	-	0	0	-	0	0	-	0	0	-	0	0	-	0	0	-	0	0	-
I	1168640	A-G	-	intron	Y48G8AL.11	0	0	-	0	0	-	0	0	-	0	0	-	0	0	-	0	0	-	0	0	-	0	0	-	0	0	-	0	0	-
I	1168641	A-G	-	intron	Y48G8AL.11	0	0	-	0	0	-	0	0	-	0	0	-	0	0	-	0	0	-	0	0	-	0	0	-	0	0	-	0	0	-
I	11691720	A-G	-	upstream	T22H2.5	0	0	-	0	0	-	0	0	-	0	0	-	0	0	-	0	0	-	0	0	-	1	0	0	0	0	-	0	0	-
I	11691764	A-G	-	upstream	T22H2.5	0	0	-	0	0	-	0	0	-	0	0	-	0	0	-	0	0	-	0	0	-	0	0	-	0	0	-	0	0	-
I	11691771	A-G	-	upstream	T22H2.5	0	0	-	0	0	-	0	0	-	0	0	-	0	0	-	0	0	-	0	0	-	0	0	-	0	0	-	0	0	-
I	11691780	A-G	-	upstream	T22H2.5	0	0	-	0	0	-	0	0	-	0	0	-	0	0	-	0	0	-	0	0	-	0	0	-	0	0	-	0	0	-
I	11691787	A-G	-	upstream	T22H2.5	0	0	-	0	0	-	0	0	-	0	0	-	0	0	-	0	0	-	0	0	-	0	0	-	0	0	-	0	0	-
I	11691801	A-G	-	upstream	T22H2.5	0	0	-	0	0	-	0	0	-	0	0	-	0	0	-	0	0	-	0	0	-	0	0	-	0	0	-	0	0	-
I	11691982	A-G	-	upstream	T22H2.5	0	0	-	0	0	-	0	0	-	0	0	-	0	0	-	0	0	-	0	0	-	0	0	-	0	0	-	0	0	-
I	11692019	A-G	-	upstream	T22H2.5	0	0	-	0	0	-	0	0	-	0	0	-	0	0	-	0	0	-	0	0	-	0	0	-	0	0	-	0	0	-
I	11692027	A-G	-	upstream	T22H2.5	0	0	-	0	0	-	0	0	-	0	0	-	0	0	-	0	0	-	0	0	-	0	0	-	0	0	-	0	0	-
I	11692044	A-G	-	upstream	T22H2.5	0	0	-	0	0	-	0	0	-	0	0	-	0	0	-	0	0	-	0	0	-	0	0	-	0	0	-	0	0	-
I	11692049	A-G	-	upstream	T22H2.5	0	0	-	0	0	-	0	0	-	0	0	-	0	0	-	0	0	-	0	0	-	0	0	-	0	0	-	0	0	-
I	11692054	A-G	-	upstream	T22H2.5	0	0	-	0	0	-	0	0	-	0	0	-	0	0	-	0	0	-	0	0	-	0	0	-	0	0	-	0	0	-
I	11692055	A-G	-	upstream	T22H2.5	0	0	-	0	0	-	0	0	-	0	0	-	0	0	-	0	0	-	0	0	-	0	0	-	0	0	-	0	0	-
I	11692062	A-G	-	upstream	T22H2.5	0	0	-	0	0	-	0	0	-	0	0	-	0	0	-	0	0	-	0	0	-	0	0	-	0	0	-	0	0	-
I	11692068	A-G	-	upstream	T22H2.5	0	0	-	0	0	-	0	0	-	0	0	-	0	0	-	0	0	-	0	0	-	0	0	-	0	0	-	0	0	-
I	11692076	A-G	-	upstream	T22H2.5	0	0	-	0	0	-	0	0	-	0	0	-	0	0	-	0	0	-	0	0	-	0	0	-	0	0	-	0	0	-
I	11697011	A-G	-	CDS	T22H2.3	0	0	-	0	0	-	0	0	-	0	0	-	0	0	-	0	0	-	0	0	-	0	0	-	0	0	-	0	0	-
I	1181435	A-G	-	intron	null	0	0	-	1	0	0	0	0	-	0	0	-	0	0	-	0	0	-	0	0	-	0	0	-	0	0	-	0	0	-
I	1181440	A-G	-	intron	null	0	0	-	1	0	0	0	0	-	0	0	-	0	0	-	0	0	-	0	0	-	0	0	-	0	0	-	0	0	-
I	1181474	A-G	-	intron	null	0	0	-	1	0	0	0	0	-	0	0	-	0	0	-	0	0	-	0	0	-	0	0	-	0	0	-	0	0	-
I	1181489	A-G	-	intron	null	0	0	-	1	0	0	0	0	-	0	0	-	0	0	-	0	0	-	0	0	-	0	0	-	0	0	-	0	0	-
I	1181503	A-G	-	intron	null	0	0	-	1	0	0	0	0	-	0	0	-	0	0	-	0	0	-	0	0	-	0	0	-	0	0	-	0	0	-
I	1181544	A-G	-	intron	null	0	0	-	1	0	0	0	0	-	0	0	-	0	0	-	0	0	-	0	0	-	0	0	-	0	0	-	0	0	-
I	1181546	A-G	-	intron	null	0	0	-	1	0	0	0	0	-	0	0	-	0	0	-	0	0	-	0	0	-	0	0	-	0	0	-	0	0	-
I	1181551	A-G	-	intron	null	0	0	-	1	0	0	0	0	-	0	0	-	0	0	-	0	0	-	0	0	-	0	0	-	0	0	-	0	0	-
I	1181583	A-G	-	intron	null	0	0	-	0	0	-	0	0	-	0	0	-	0	0	-	0	0	-	0	0	-	0	0	-	0	0	-	0	0	-
I	1181979	A-G	-	intron	null	1	0	0	0	0	-	0	0	-	0	0	-	0	0	-	0	0	-	0	0	-	1	0	0	0	0	-	0	0	-
I	1181984	A-G	-	intron	null	1	0	0	0	0	-	0	0	-	0	0	-	0	0	-	0	0	-	0	0	-	1	0	0	0	0	-	0	0	-
I	1182012	A-G	-	intron	null	0	0	-	0	0	-	0	0	-	0	0	-	0	0	-	0	0	-	0	0	-	0	0	-	0	0	-	0	0	-
I	1182061	A-G	-	intron	null	1	0	0	0	0	-	0	0	-	0	0	-	0	0	-	0	0	-	0	0	-	1	0	0	0	0	-	0	0	-
I	1182064	A-G	-	intron	null	1	0	0	0	0	-	0	0	-	0	0	-	0	0	-	0	0	-	0	0	-	1	0	0	0	0	-	0	0	-
I	11832591	A-G	-	intron	Y47H9C.1	0	0	-	0	0	-	0	0	-	0	0	-	0	0	-	0	0	-	0	0	-	0	0	-	0	0	-	0	0	-
I	11832604	A-G	-	intron	Y47H9C.1	0	0	-	0	0	-	0	0	-	0	0	-	0	0	-	0	0	-	0	0	-	0	0	-	0	0	-	0	0	-
I	1184224	A-G	+	intron	Y48G8AL.6	1	1	1	0	0	-	0	0	-	1	1	1	0	0	-	1	0	0	0	0	-	0	0	-	0	0	-	0	0	-
I	1184227	A-G	+	intron	Y48G8AL.6	1	1	1	0	0	-	0	0	-	1	1	1	0	0	-	1	0	0	0	0	-	0	0	-	0	0	-	0	0	-
I	1184242	A-G	+	intron	Y48G8AL.6	1	1	1	0	0	-	0	0	-	1	1	1	0	0	-	1	0	0	0	0	-	0	0	-	0	0	-	0	0	-
I	1184243	A-G	+	intron	Y48G8AL.6	1	1	1	0	0	-	0	0	-	1	1	1	0	0	-	1	0	0	0	0	-	0	0	-	0	0	-	0	0	-
I	1184253	A-G	+	intron	Y48G8AL.6	1	1	1	0	0	-	0	0	-	1	1	1	0	0	-	1	0	0	0	0	-	0	0	-	0	0	-	0	0	-
I	1184257	A-G	+	intron	Y48G8AL.6	1	1	1	0	0	-	0	0	-	1	1	1	0	0	-	1	0	0	0	0	-	0	0	-	0	0	-	0	0	-
I	1184258	A-G	+	intron	Y48G8AL.6	1	1	1	0	0	-	0	0	-	1	1	1	0	0	-	1	0	0	0	0	-	0	0	-	0	0	-	0	0	-
I	11842854	A-G	-	antisense	Y47H9C.2	0	0	-	0	0	-	0	0	-	1	0	0	0	0	-	0	0	-	1	0	0	0	0	-	1	0	0	0	0	-
I	11842855	A-G	+	intron	Y47H9C.2	0	0	-	0	0	-	0	0	-	1	1	1	0	0	-	0	0	-	1	1	1	0	0	-	1	1	1	0	0	-
I	11842953	A-G	+	intron	Y47H9C.2	0	0	-	0	0	-	0	0	-	1	0	0	0	0	-	0	0	-	1	1	1	0	0	-	1	1	1	0	0	-
I	1184297	A-G	+	intron	Y48G8AL.6	1	1	1	0	0	-	0	0	-	1	1	1	0	0	-	0	0	-	0	0	-	0	0	-	0	0	-	0	0	-
I	11842970	A-G	+	intron	Y47H9C.2	0	0	-	0	0	-	0	0	-	1	0	0	0	0	-	0	0	-	1	1	1	0	0	-	1	1	1	0	0	-
I	1184298	A-G	+	intron	Y48G8AL.6	1	1	1	0	0	-	0	0	-	1	1	1	0	0	-	0	0	-	0	0	-	0	0	-	0	0	-	0	0	-
I	11842971	A-G	+	intron	Y47H9C.2	0	0	-	0	0	-	0	0	-	1	0	0	0	0	-	0	0	-	1	1	1	0	0	-	1	1	1	0	0	-
I	1184302	A-G	+	intron	Y48G8AL.6	1	1	1	0	0	-	0	0	-	1	1	1	0	0	-	0	0	-	0	0	-	0	0	-	0	0	-	0	0	-
I	1184303	A-G	+	intron	Y48G8AL.6	1	1	1	0	0	-	0	0	-	1	1	1	0	0	-	0	0	-	0	0	-	0	0	-	0	0	-	0	0	-
I	11845924	A-G	+	intron	Y47H9C.2	1	1	1	1	0	0	1	1	1	0	0	-	1	0	0	0	0	-	0	0	-	2	1	0.5	0	0	-	0	0	-
I	11845935	A-G	+	intron	Y47H9C.2	1	0	0	1	0	0	1	0	0	0	0	-	0	0	-	0	0	-	0	0	-	2	2	1	0	0	-	0	0	-
I	11845962	A-G	+	intron	Y47H9C.2	1	0	0	1	0	0	2	1	0.5	0	0	-	1	1	1	0	0	-	0	0	-	2	0	0	1	0	0	1	0	0
I	11845992	A-G	+	intron	Y47H9C.2	1	1	1	0	0	-	2	2	1	0	0	-	1	1	1	0	0	-	0	0	-	2	2	1	1	1	1	1	1	1
I	11845993	A-G	+	intron	Y47H9C.2	1	0	0	0	0	-	2	2	1	0	0	-	1	1	1	0	0	-	0	0	-	2	1	0.5	1	0	0	1	0	0
I	11845994	A-G	+	intron	Y47H9C.2	1	1	1	0	0	-	2	2	1	0	0	-	1	0	0	0	0	-	0	0	-	2	0	0	1	0	0	1	0	0
I	11845995	A-G	+	intron	Y47H9C.2	1	1	1	0	0	-	2	1	0.5	0	0	-	1	0	0	0	0	-	0	0	-	2	2	1	1	0	0	1	1	1
I	11845998	A-G	+	intron	Y47H9C.2	1	1	1	0	0	-	2	2	1	0	0	-	1	1	1	0	0	-	0	0	-	2	2	1	1	1	1	1	1	1
I	11846008	A-G	+	intron	Y47H9C.2	1	0	0	0	0	-	2	2	1	0	0	-	1	1	1	0	0	-	0	0	-	2	1	0.5	1	0	0	1	0	0
I	11846015	A-G	+	intron	Y47H9C.2	1	0	0	0	0	-	2	2	1	0	0	-	1	1	1	0	0	-	0	0	-	2	2	1	1	1	1	1	0	0
I	11846021	A-G	+	intron	Y47H9C.2	1	0	0	0	0	-	2	2	1	0	0	-	1	1	1	0	0	-	0	0	-	2	2	1	1	0	0	1	1	1
I	11846022	A-G	+	intron	Y47H9C.2	1	1	1	0	0	-	2	2	1	0	0	-	1	0	0	0	0	-	0	0	-	2	2	1	1	1	1	1	1	1
I	11846035	A-G	+	intron	Y47H9C.2	1	1	1	0	0	-	2	1	0.5	0	0	-	1	0	0	0	0	-	0	0	-	2	2	1	1	0	0	1	1	1
I	11846036	A-G	+	intron	Y47H9C.2	1	0	0	0	0	-	2	2	1	0	0	-	1	1	1	0	0	-	0	0	-	2	2	1	1	1	1	1	1	1
I	11846041	A-G	+	intron	Y47H9C.2	1	1	1	0	0	-	2	1	0.5	0	0	-	1	1	1	0	0	-	0	0	-	2	2	1	1	1	1	1	1	1
I	11846054	A-G	+	intron	Y47H9C.2	1	1	1	0	0	-	2	2	1	0	0	-	1	1	1	0	0	-	0	0	-	0	0	-	0	0	-	1	0	0
I	11846055	A-G	+	intron	Y47H9C.2	1	0	0	0	0	-	2	1	0.5	0	0	-	1	1	1	0	0	-	0	0	-	0	0	-	0	0	-	1	0	0
I	11846064	A-G	+	intron	Y47H9C.2	1	0	0	0	0	-	2	2	1	0	0	-	1	0	0	0	0	-	0	0	-	0	0	-	1	0	0	1	0	0
I	11851586	A-G	+	antisense	Y47H9C.4	0	0	-	0	0	-	2	2	1	0	0	-	0	0	-	0	0	-	0	0	-	0	0	-	0	0	-	0	0	-
I	11871063	A-G	-	integenic	-	0	0	-	0	0	-	0	0	-	0	0	-	0	0	-	0	0	-	0	0	-	0	0	-	0	0	-	0	0	-
I	11871134	A-G	-	integenic	-	0	0	-	0	0	-	0	0	-	0	0	-	0	0	-	0	0	-	0	0	-	0	0	-	0	0	-	0	0	-
I	11872466	A-G	-	integenic	-	0	0	-	0	0	-	0	0	-	0	0	-	0	0	-	0	0	-	0	0	-	0	0	-	0	0	-	0	0	-
I	11872467	A-G	-	integenic	-	0	0	-	0	0	-	0	0	-	0	0	-	0	0	-	0	0	-	0	0	-	0	0	-	0	0	-	0	0	-
I	11872717	A-G	-	integenic	-	0	0	-	0	0	-	0	0	-	0	0	-	0	0	-	0	0	-	0	0	-	0	0	-	0	0	-	0	0	-
I	11872723	A-G	-	integenic	-	0	0	-	0	0	-	0	0	-	0	0	-	0	0	-	0	0	-	0	0	-	0	0	-	0	0	-	0	0	-
I	11872739	A-G	-	integenic	-	0	0	-	0	0	-	0	0	-	0	0	-	0	0	-	0	0	-	0	0	-	0	0	-	0	0	-	0	0	-
I	11872744	A-G	-	integenic	-	0	0	-	0	0	-	0	0	-	0	0	-	0	0	-	0	0	-	0	0	-	0	0	-	0	0	-	0	0	-
I	11872745	A-G	-	integenic	-	0	0	-	0	0	-	0	0	-	0	0	-	0	0	-	0	0	-	0	0	-	0	0	-	0	0	-	0	0	-
I	11872748	A-G	-	integenic	-	0	0	-	0	0	-	0	0	-	0	0	-	0	0	-	0	0	-	0	0	-	0	0	-	0	0	-	0	0	-
I	11872749	A-G	-	integenic	-	0	0	-	0	0	-	0	0	-	0	0	-	0	0	-	0	0	-	0	0	-	0	0	-	0	0	-	0	0	-
I	11905	A-G	+	intron	Y74C9A.2	0	0	-	0	0	-	0	0	-	0	0	-	0	0	-	0	0	-	0	0	-	1	1	1	2	1	0.5	0	0	-
I	11917218	A-G	-	intron	R06C1.1	0	0	-	0	0	-	0	0	-	0	0	-	0	0	-	0	0	-	0	0	-	0	0	-	0	0	-	0	0	-
I	11917219	A-G	-	intron	R06C1.1	0	0	-	0	0	-	0	0	-	0	0	-	0	0	-	0	0	-	0	0	-	0	0	-	0	0	-	0	0	-
I	11917251	A-G	-	intron	R06C1.1	0	0	-	1	0	0	0	0	-	0	0	-	0	0	-	0	0	-	0	0	-	1	0	0	0	0	-	0	0	-
I	11917258	A-G	-	intron	R06C1.1	0	0	-	1	0	0	0	0	-	0	0	-	0	0	-	0	0	-	0	0	-	1	0	0	0	0	-	0	0	-
I	11917261	A-G	-	intron	R06C1.1	0	0	-	1	0	0	0	0	-	0	0	-	0	0	-	0	0	-	0	0	-	1	0	0	0	0	-	0	0	-
I	11917284	A-G	-	intron	R06C1.1	0	0	-	1	0	0	0	0	-	0	0	-	0	0	-	0	0	-	0	0	-	1	0	0	0	0	-	0	0	-
I	11917285	A-G	-	intron	R06C1.1	0	0	-	1	0	0	0	0	-	0	0	-	0	0	-	0	0	-	0	0	-	1	0	0	0	0	-	0	0	-
I	11924687	A-G	-	downstream	R06C1.3	0	0	-	0	0	-	0	0	-	0	0	-	0	0	-	0	0	-	0	0	-	0	0	-	0	0	-	0	0	-
I	11924688	A-G	-	downstream	R06C1.3	0	0	-	0	0	-	0	0	-	0	0	-	0	0	-	0	0	-	0	0	-	0	0	-	0	0	-	0	0	-
I	11924689	A-G	-	downstream	R06C1.3	0	0	-	0	0	-	0	0	-	0	0	-	0	0	-	0	0	-	0	0	-	0	0	-	0	0	-	0	0	-
I	11924690	A-G	-	downstream	R06C1.3	0	0	-	0	0	-	0	0	-	0	0	-	0	0	-	0	0	-	0	0	-	0	0	-	0	0	-	0	0	-
I	11924714	A-G	-	downstream	R06C1.3	0	0	-	0	0	-	0	0	-	0	0	-	0	0	-	0	0	-	0	0	-	0	0	-	0	0	-	0	0	-
I	11924715	A-G	-	downstream	R06C1.3	0	0	-	0	0	-	0	0	-	0	0	-	0	0	-	0	0	-	0	0	-	0	0	-	0	0	-	0	0	-
I	11924718	A-G	-	downstream	R06C1.3	0	0	-	0	0	-	0	0	-	0	0	-	0	0	-	0	0	-	0	0	-	0	0	-	0	0	-	0	0	-
I	11924719	A-G	-	downstream	R06C1.3	0	0	-	0	0	-	0	0	-	0	0	-	0	0	-	0	0	-	0	0	-	0	0	-	0	0	-	0	0	-
I	11924725	A-G	-	downstream	R06C1.3	0	0	-	0	0	-	0	0	-	0	0	-	0	0	-	0	0	-	0	0	-	0	0	-	0	0	-	0	0	-
I	11924749	A-G	-	downstream	R06C1.3	0	0	-	0	0	-	0	0	-	0	0	-	0	0	-	0	0	-	0	0	-	0	0	-	0	0	-	0	0	-
I	11924761	A-G	-	downstream	R06C1.3	0	0	-	0	0	-	0	0	-	0	0	-	0	0	-	0	0	-	0	0	-	0	0	-	0	0	-	0	0	-
I	11924762	A-G	-	downstream	R06C1.3	0	0	-	0	0	-	0	0	-	0	0	-	0	0	-	0	0	-	0	0	-	0	0	-	0	0	-	0	0	-
I	11924781	A-G	-	3UTR	R06C1.3	0	0	-	0	0	-	0	0	-	0	0	-	0	0	-	0	0	-	0	0	-	0	0	-	0	0	-	0	0	-
I	11924782	A-G	-	3UTR	R06C1.3	0	0	-	0	0	-	0	0	-	0	0	-	0	0	-	0	0	-	0	0	-	0	0	-	0	0	-	0	0	-
I	11924783	A-G	-	3UTR	R06C1.3	0	0	-	0	0	-	0	0	-	0	0	-	0	0	-	0	0	-	0	0	-	0	0	-	0	0	-	0	0	-
I	11924792	A-G	-	3UTR	R06C1.3	0	0	-	0	0	-	0	0	-	0	0	-	0	0	-	0	0	-	0	0	-	0	0	-	0	0	-	0	0	-
I	11925190	A-G	-	3UTR	R06C1.3	0	0	-	0	0	-	0	0	-	0	0	-	0	0	-	0	0	-	0	0	-	0	0	-	0	0	-	0	0	-
I	11925191	A-G	-	3UTR	R06C1.3	0	0	-	0	0	-	0	0	-	0	0	-	0	0	-	0	0	-	0	0	-	0	0	-	0	0	-	0	0	-
I	11925192	A-G	-	3UTR	R06C1.3	0	0	-	0	0	-	0	0	-	0	0	-	0	0	-	0	0	-	0	0	-	0	0	-	0	0	-	0	0	-
I	11925194	A-G	-	3UTR	R06C1.3	0	0	-	0	0	-	0	0	-	0	0	-	0	0	-	0	0	-	0	0	-	0	0	-	0	0	-	0	0	-
I	11925214	A-G	-	3UTR	R06C1.3	0	0	-	0	0	-	0	0	-	0	0	-	0	0	-	1	0	0	0	0	-	0	0	-	0	0	-	0	0	-
I	11925220	A-G	-	3UTR	R06C1.3	0	0	-	0	0	-	0	0	-	0	0	-	0	0	-	1	0	0	0	0	-	0	0	-	0	0	-	0	0	-
I	11927994	A-G	-	intron	R06C1.3	0	0	-	0	0	-	0	0	-	0	0	-	0	0	-	0	0	-	0	0	-	0	0	-	0	0	-	0	0	-
I	11928027	A-G	-	intron	R06C1.3	0	0	-	0	0	-	0	0	-	0	0	-	0	0	-	0	0	-	0	0	-	0	0	-	0	0	-	0	0	-
I	11934763	A-G	+	downstream	R06C1.14;R06C1.9	0	0	-	3	2	0.666667	1	0	0	0	0	-	0	0	-	1	0	0	1	1	1	4	1	0.25	0	0	-	0	0	-
I	11938078	A-G	+	upstream	null	0	0	-	1	0	0	1	1	1	0	0	-	0	0	-	0	0	-	0	0	-	2	2	1	0	0	-	0	0	-
I	11938079	A-G	+	upstream	null	0	0	-	1	0	0	1	1	1	0	0	-	0	0	-	0	0	-	0	0	-	2	2	1	0	0	-	0	0	-
I	11938084	A-G	+	upstream	null	1	1	1	1	1	1	1	1	1	0	0	-	0	0	-	0	0	-	0	0	-	2	2	1	0	0	-	0	0	-
I	11938095	A-G	+	upstream	null	1	0	0	1	1	1	1	1	1	0	0	-	0	0	-	0	0	-	0	0	-	2	1	0.5	0	0	-	0	0	-
I	11938096	A-G	+	upstream	null	1	1	1	1	1	1	1	1	1	0	0	-	0	0	-	0	0	-	0	0	-	2	2	1	0	0	-	0	0	-
I	11939785	A-G	+	upstream	null	0	0	-	0	0	-	0	0	-	0	0	-	0	0	-	0	0	-	0	0	-	2	2	1	0	0	-	0	0	-
I	11939786	A-G	+	upstream	null	0	0	-	0	0	-	0	0	-	0	0	-	0	0	-	0	0	-	0	0	-	2	2	1	0	0	-	0	0	-
I	11939793	A-G	+	upstream	null	0	0	-	0	0	-	0	0	-	0	0	-	0	0	-	0	0	-	0	0	-	3	3	1	0	0	-	0	0	-
I	11939809	A-G	+	upstream	null	0	0	-	0	0	-	0	0	-	0	0	-	0	0	-	0	0	-	0	0	-	3	3	1	0	0	-	0	0	-
I	11939811	A-G	+	upstream	null	0	0	-	0	0	-	0	0	-	0	0	-	0	0	-	0	0	-	0	0	-	3	2	0.666667	0	0	-	0	0	-
I	11939856	A-G	+	upstream	null	0	0	-	0	0	-	0	0	-	0	0	-	0	0	-	0	0	-	0	0	-	2	2	1	0	0	-	0	0	-
I	11944786	A-G	+	downstream	R06C1.13	1	1	1	1	1	1	0	0	-	0	0	-	0	0	-	1	1	1	0	0	-	3	3	1	0	0	-	0	0	-
I	11944903	A-G	+	downstream	R06C1.13	1	1	1	1	1	1	0	0	-	0	0	-	0	0	-	2	2	1	0	0	-	3	3	1	0	0	-	0	0	-
I	11944904	A-G	+	downstream	R06C1.13	1	1	1	1	1	1	0	0	-	0	0	-	0	0	-	2	2	1	0	0	-	4	3	0.75	0	0	-	0	0	-
I	11944905	A-G	+	downstream	R06C1.13	1	1	1	1	1	1	0	0	-	0	0	-	0	0	-	2	2	1	0	0	-	4	3	0.75	0	0	-	0	0	-
I	11944907	A-G	+	downstream	R06C1.13	1	0	0	1	1	1	0	0	-	0	0	-	0	0	-	2	1	0.5	0	0	-	3	2	0.666667	0	0	-	0	0	-
I	11944909	A-G	+	downstream	R06C1.13	1	1	1	1	0	0	0	0	-	0	0	-	0	0	-	2	1	0.5	0	0	-	4	3	0.75	0	0	-	0	0	-
I	11944912	A-G	+	downstream	R06C1.13	1	1	1	1	1	1	0	0	-	0	0	-	0	0	-	2	2	1	0	0	-	3	3	1	0	0	-	0	0	-
I	11944929	A-G	+	downstream	R06C1.13	1	1	1	1	1	1	0	0	-	0	0	-	0	0	-	3	2	0.666667	0	0	-	8	3	0.375	0	0	-	0	0	-
I	11944941	A-G	+	downstream	R06C1.13	0	0	-	3	2	0.666667	0	0	-	0	0	-	0	0	-	2	0	0	0	0	-	9	1	0.111111	0	0	-	0	0	-
I	11944950	A-G	+	downstream	R06C1.13	0	0	-	3	2	0.666667	0	0	-	0	0	-	0	0	-	2	1	0.5	0	0	-	10	4	0.4	0	0	-	0	0	-
I	11944954	A-G	+	downstream	R06C1.13	0	0	-	3	0	0	0	0	-	0	0	-	0	0	-	2	1	0.5	0	0	-	10	3	0.3	0	0	-	0	0	-
I	11944964	A-G	+	downstream	R06C1.13	0	0	-	3	1	0.333333	0	0	-	0	0	-	0	0	-	2	1	0.5	0	0	-	9	2	0.222222	0	0	-	0	0	-
I	11944971	A-G	+	downstream	R06C1.13	0	0	-	3	0	0	0	0	-	0	0	-	0	0	-	2	1	0.5	0	0	-	9	2	0.222222	0	0	-	0	0	-
I	11944972	A-G	+	downstream	R06C1.13	0	0	-	3	1	0.333333	0	0	-	0	0	-	0	0	-	1	0	0	0	0	-	9	3	0.333333	0	0	-	0	0	-
I	11944973	A-G	+	downstream	R06C1.13	0	0	-	3	1	0.333333	0	0	-	0	0	-	0	0	-	2	1	0.5	0	0	-	9	1	0.111111	0	0	-	0	0	-
I	11944986	A-G	+	downstream	R06C1.13	0	0	-	3	3	1	0	0	-	0	0	-	0	0	-	2	2	1	0	0	-	9	9	1	0	0	-	0	0	-
I	11944989	A-G	+	downstream	R06C1.13	0	0	-	3	3	1	0	0	-	0	0	-	0	0	-	2	2	1	0	0	-	8	5	0.625	0	0	-	0	0	-
I	11945004	A-G	+	downstream	R06C1.13	0	0	-	3	2	0.666667	0	0	-	0	0	-	0	0	-	1	0	0	0	0	-	7	1	0.142857	0	0	-	0	0	-
I	11945009	A-G	+	downstream	R06C1.13	0	0	-	3	0	0	0	0	-	0	0	-	0	0	-	1	1	1	0	0	-	7	3	0.428571	0	0	-	0	0	-
I	11945016	A-G	+	downstream	R06C1.13	0	0	-	3	2	0.666667	0	0	-	0	0	-	0	0	-	1	0	0	0	0	-	4	1	0.25	0	0	-	0	0	-
I	11945021	A-G	+	downstream	R06C1.13	0	0	-	3	2	0.666667	0	0	-	0	0	-	0	0	-	2	1	0.5	0	0	-	4	2	0.5	0	0	-	0	0	-
I	11945041	A-G	+	downstream	R06C1.13	0	0	-	3	2	0.666667	0	0	-	0	0	-	0	0	-	3	3	1	0	0	-	6	3	0.5	0	0	-	0	0	-
I	11945057	A-G	+	downstream	R06C1.13	0	0	-	3	0	0	0	0	-	0	0	-	0	0	-	3	0	0	0	0	-	10	2	0.2	0	0	-	0	0	-
I	11945058	A-G	+	downstream	R06C1.13	0	0	-	3	2	0.666667	0	0	-	0	0	-	0	0	-	3	2	0.666667	0	0	-	10	5	0.5	0	0	-	0	0	-
I	11945060	A-G	+	downstream	R06C1.13	0	0	-	3	1	0.333333	0	0	-	0	0	-	0	0	-	3	1	0.333333	0	0	-	10	0	0	0	0	-	0	0	-
I	11945064	A-G	+	downstream	R06C1.13	0	0	-	4	3	0.75	0	0	-	0	0	-	0	0	-	3	0	0	0	0	-	10	4	0.4	0	0	-	0	0	-
I	11945068	A-G	+	downstream	R06C1.13	0	0	-	3	2	0.666667	0	0	-	0	0	-	0	0	-	3	3	1	0	0	-	10	6	0.6	0	0	-	0	0	-
I	11945070	A-G	+	downstream	R06C1.13	0	0	-	4	2	0.5	0	0	-	0	0	-	0	0	-	3	0	0	0	0	-	10	4	0.4	0	0	-	0	0	-
I	11945071	A-G	+	downstream	R06C1.13	0	0	-	4	3	0.75	0	0	-	0	0	-	0	0	-	3	2	0.666667	0	0	-	10	7	0.7	0	0	-	0	0	-
I	11945072	A-G	+	downstream	R06C1.13	0	0	-	4	0	0	0	0	-	0	0	-	0	0	-	3	2	0.666667	0	0	-	10	1	0.1	0	0	-	0	0	-
I	11945076	A-G	+	downstream	R06C1.13	0	0	-	4	1	0.25	0	0	-	0	0	-	0	0	-	3	1	0.333333	0	0	-	10	2	0.2	0	0	-	0	0	-
I	11945321	A-G	+	downstream/upstream	R06C1.13;R06C1.6	0	0	-	0	0	-	0	0	-	0	0	-	0	0	-	0	0	-	0	0	-	4	4	1	0	0	-	0	0	-
I	11945326	A-G	+	downstream/upstream	R06C1.13;R06C1.6	0	0	-	0	0	-	0	0	-	0	0	-	0	0	-	0	0	-	0	0	-	5	5	1	0	0	-	0	0	-
I	11945327	A-G	+	downstream/upstream	R06C1.13;R06C1.6	0	0	-	0	0	-	0	0	-	0	0	-	0	0	-	0	0	-	0	0	-	5	3	0.6	0	0	-	0	0	-
I	11945335	A-G	+	downstream/upstream	R06C1.13;R06C1.6	0	0	-	0	0	-	0	0	-	0	0	-	0	0	-	0	0	-	0	0	-	8	5	0.625	0	0	-	0	0	-
I	11945341	A-G	+	downstream/upstream	R06C1.13;R06C1.6	0	0	-	0	0	-	0	0	-	0	0	-	0	0	-	0	0	-	0	0	-	8	7	0.875	0	0	-	0	0	-
I	11945342	A-G	+	downstream/upstream	R06C1.13;R06C1.6	0	0	-	0	0	-	0	0	-	0	0	-	0	0	-	0	0	-	0	0	-	8	7	0.875	0	0	-	0	0	-
I	11945346	A-G	+	downstream/upstream	R06C1.13;R06C1.6	0	0	-	0	0	-	0	0	-	0	0	-	0	0	-	0	0	-	0	0	-	8	2	0.25	0	0	-	0	0	-
I	11945351	A-G	+	downstream/upstream	R06C1.13;R06C1.6	0	0	-	0	0	-	0	0	-	0	0	-	0	0	-	0	0	-	0	0	-	7	6	0.857143	0	0	-	0	0	-
I	11945352	A-G	+	downstream/upstream	R06C1.13;R06C1.6	0	0	-	0	0	-	0	0	-	0	0	-	0	0	-	0	0	-	0	0	-	7	4	0.571429	0	0	-	0	0	-
I	11945353	A-G	+	downstream/upstream	R06C1.13;R06C1.6	0	0	-	0	0	-	0	0	-	0	0	-	0	0	-	0	0	-	0	0	-	7	4	0.571429	0	0	-	0	0	-
I	11945367	A-G	+	downstream/upstream	R06C1.13;R06C1.6	0	0	-	0	0	-	0	0	-	0	0	-	0	0	-	0	0	-	0	0	-	5	3	0.6	0	0	-	0	0	-
I	11945389	A-G	+	downstream/upstream	R06C1.13;R06C1.6	0	0	-	0	0	-	0	0	-	0	0	-	0	0	-	0	0	-	0	0	-	4	2	0.5	0	0	-	0	0	-
I	11945394	A-G	+	downstream/upstream	R06C1.13;R06C1.6	0	0	-	0	0	-	0	0	-	0	0	-	0	0	-	0	0	-	0	0	-	7	4	0.571429	0	0	-	0	0	-
I	11945395	A-G	+	downstream/upstream	R06C1.13;R06C1.6	0	0	-	0	0	-	0	0	-	0	0	-	0	0	-	0	0	-	0	0	-	7	5	0.714286	0	0	-	0	0	-
I	11945396	A-G	+	downstream/upstream	R06C1.13;R06C1.6	0	0	-	0	0	-	0	0	-	0	0	-	0	0	-	0	0	-	0	0	-	7	4	0.571429	0	0	-	0	0	-
I	11945408	A-G	+	downstream/upstream	R06C1.13;R06C1.6	0	0	-	0	0	-	0	0	-	0	0	-	0	0	-	0	0	-	0	0	-	7	6	0.857143	0	0	-	0	0	-
I	11945412	A-G	+	downstream/upstream	R06C1.13;R06C1.6	0	0	-	0	0	-	0	0	-	0	0	-	0	0	-	0	0	-	0	0	-	7	2	0.285714	0	0	-	0	0	-
I	11945423	A-G	+	downstream/upstream	R06C1.13;R06C1.6	0	0	-	0	0	-	0	0	-	0	0	-	0	0	-	0	0	-	0	0	-	3	3	1	0	0	-	0	0	-
I	11945426	A-G	+	downstream/upstream	R06C1.13;R06C1.6	0	0	-	0	0	-	0	0	-	0	0	-	0	0	-	0	0	-	0	0	-	3	3	1	0	0	-	0	0	-
I	11945436	A-G	+	downstream/upstream	R06C1.13;R06C1.6	0	0	-	0	0	-	0	0	-	0	0	-	0	0	-	0	0	-	0	0	-	3	3	1	0	0	-	0	0	-
I	11945437	A-G	+	downstream/upstream	R06C1.13;R06C1.6	0	0	-	0	0	-	0	0	-	0	0	-	0	0	-	0	0	-	0	0	-	3	2	0.666667	0	0	-	0	0	-
I	11945438	A-G	+	downstream/upstream	R06C1.13;R06C1.6	0	0	-	0	0	-	0	0	-	0	0	-	0	0	-	0	0	-	0	0	-	3	3	1	0	0	-	0	0	-
I	11945439	A-G	+	downstream/upstream	R06C1.13;R06C1.6	0	0	-	0	0	-	0	0	-	0	0	-	0	0	-	0	0	-	0	0	-	3	2	0.666667	0	0	-	0	0	-
I	11945443	A-G	+	downstream/upstream	R06C1.13;R06C1.6	0	0	-	0	0	-	0	0	-	0	0	-	0	0	-	0	0	-	0	0	-	4	4	1	0	0	-	0	0	-
I	11945448	A-G	+	downstream/upstream	R06C1.13;R06C1.6	0	0	-	0	0	-	0	0	-	0	0	-	0	0	-	0	0	-	0	0	-	4	3	0.75	0	0	-	0	0	-
I	11945451	A-G	+	downstream/upstream	R06C1.13;R06C1.6	0	0	-	0	0	-	0	0	-	0	0	-	0	0	-	0	0	-	0	0	-	4	4	1	0	0	-	0	0	-
I	1194808	A-G	+	intron	Y48G8AL.5	1	1	1	1	1	1	1	1	1	0	0	-	0	0	-	0	0	-	0	0	-	0	0	-	0	0	-	0	0	-
I	1194809	A-G	+	intron	Y48G8AL.5	1	0	0	1	1	1	1	1	1	0	0	-	0	0	-	0	0	-	0	0	-	0	0	-	0	0	-	0	0	-
I	1194828	A-G	+	intron	Y48G8AL.5	1	1	1	1	1	1	1	1	1	0	0	-	0	0	-	0	0	-	0	0	-	0	0	-	0	0	-	0	0	-
I	1194837	A-G	+	intron	Y48G8AL.5	1	1	1	1	1	1	1	1	1	0	0	-	0	0	-	0	0	-	0	0	-	0	0	-	0	0	-	0	0	-
I	1194841	A-G	+	intron	Y48G8AL.5	1	1	1	1	1	1	1	1	1	0	0	-	0	0	-	0	0	-	0	0	-	0	0	-	0	0	-	0	0	-
I	1194844	A-G	+	intron	Y48G8AL.5	1	1	1	1	1	1	1	1	1	0	0	-	0	0	-	0	0	-	0	0	-	0	0	-	0	0	-	0	0	-
I	1194845	A-G	+	intron	Y48G8AL.5	1	1	1	1	1	1	1	1	1	0	0	-	0	0	-	0	0	-	0	0	-	0	0	-	0	0	-	0	0	-
I	1194851	A-G	+	intron	Y48G8AL.5	2	2	1	1	1	1	1	1	1	0	0	-	0	0	-	0	0	-	0	0	-	0	0	-	0	0	-	0	0	-
I	11960522	A-G	-	intron	Y53C10A.12	0	0	-	0	0	-	0	0	-	0	0	-	0	0	-	0	0	-	0	0	-	0	0	-	0	0	-	0	0	-
I	11960525	A-G	-	intron	Y53C10A.12	0	0	-	0	0	-	0	0	-	0	0	-	0	0	-	0	0	-	0	0	-	0	0	-	0	0	-	0	0	-
I	11960527	A-G	-	intron	Y53C10A.12	0	0	-	0	0	-	0	0	-	0	0	-	0	0	-	0	0	-	0	0	-	0	0	-	0	0	-	0	0	-
I	11960537	A-G	-	intron	Y53C10A.12	0	0	-	0	0	-	0	0	-	0	0	-	0	0	-	0	0	-	0	0	-	0	0	-	0	0	-	0	0	-
I	11960540	A-G	-	intron	Y53C10A.12	0	0	-	0	0	-	0	0	-	0	0	-	0	0	-	0	0	-	0	0	-	0	0	-	0	0	-	0	0	-
I	11960541	A-G	-	intron	Y53C10A.12	0	0	-	0	0	-	0	0	-	0	0	-	0	0	-	0	0	-	0	0	-	0	0	-	0	0	-	0	0	-
I	11960542	A-G	-	intron	Y53C10A.12	0	0	-	0	0	-	0	0	-	0	0	-	0	0	-	0	0	-	0	0	-	0	0	-	0	0	-	0	0	-
I	11960543	A-G	-	intron	Y53C10A.12	0	0	-	0	0	-	0	0	-	0	0	-	0	0	-	0	0	-	0	0	-	0	0	-	0	0	-	0	0	-
I	11960544	A-G	-	intron	Y53C10A.12	0	0	-	0	0	-	0	0	-	0	0	-	0	0	-	0	0	-	0	0	-	0	0	-	0	0	-	0	0	-
I	11960550	A-G	-	intron	Y53C10A.12	0	0	-	0	0	-	0	0	-	0	0	-	0	0	-	0	0	-	0	0	-	0	0	-	0	0	-	0	0	-
I	11960555	A-G	-	intron	Y53C10A.12	0	0	-	0	0	-	0	0	-	0	0	-	0	0	-	0	0	-	0	0	-	0	0	-	0	0	-	0	0	-
I	11960559	A-G	-	intron	Y53C10A.12	0	0	-	0	0	-	0	0	-	0	0	-	0	0	-	0	0	-	0	0	-	0	0	-	0	0	-	0	0	-
I	11960560	A-G	-	intron	Y53C10A.12	0	0	-	0	0	-	0	0	-	0	0	-	0	0	-	0	0	-	0	0	-	0	0	-	0	0	-	0	0	-
I	11960561	A-G	-	intron	Y53C10A.12	0	0	-	0	0	-	0	0	-	0	0	-	0	0	-	0	0	-	0	0	-	0	0	-	0	0	-	0	0	-
I	11960565	A-G	-	intron	Y53C10A.12	0	0	-	0	0	-	0	0	-	0	0	-	0	0	-	0	0	-	0	0	-	0	0	-	0	0	-	0	0	-
I	11960569	A-G	-	intron	Y53C10A.12	0	0	-	0	0	-	0	0	-	0	0	-	0	0	-	0	0	-	0	0	-	0	0	-	0	0	-	0	0	-
I	11960570	A-G	-	intron	Y53C10A.12	0	0	-	0	0	-	0	0	-	0	0	-	0	0	-	0	0	-	0	0	-	0	0	-	0	0	-	0	0	-
I	11960571	A-G	-	intron	Y53C10A.12	0	0	-	0	0	-	0	0	-	0	0	-	0	0	-	0	0	-	0	0	-	0	0	-	0	0	-	0	0	-
I	11960572	A-G	-	intron	Y53C10A.12	0	0	-	0	0	-	0	0	-	0	0	-	0	0	-	0	0	-	0	0	-	0	0	-	0	0	-	0	0	-
I	11960573	A-G	-	intron	Y53C10A.12	0	0	-	0	0	-	0	0	-	0	0	-	0	0	-	0	0	-	0	0	-	0	0	-	0	0	-	0	0	-
I	11960585	A-G	-	intron	Y53C10A.12	0	0	-	0	0	-	0	0	-	0	0	-	0	0	-	0	0	-	0	0	-	0	0	-	0	0	-	0	0	-
I	11960586	A-G	-	intron	Y53C10A.12	0	0	-	0	0	-	0	0	-	0	0	-	0	0	-	0	0	-	0	0	-	0	0	-	0	0	-	0	0	-
I	11960599	A-G	-	intron	Y53C10A.12	0	0	-	0	0	-	0	0	-	0	0	-	0	0	-	0	0	-	0	0	-	0	0	-	0	0	-	0	0	-
I	11960600	A-G	-	intron	Y53C10A.12	0	0	-	0	0	-	0	0	-	0	0	-	0	0	-	0	0	-	0	0	-	0	0	-	0	0	-	0	0	-
I	11960601	A-G	-	intron	Y53C10A.12	0	0	-	0	0	-	0	0	-	0	0	-	0	0	-	0	0	-	0	0	-	0	0	-	0	0	-	0	0	-
I	11960606	A-G	-	intron	Y53C10A.12	0	0	-	0	0	-	0	0	-	0	0	-	0	0	-	0	0	-	0	0	-	0	0	-	0	0	-	0	0	-
I	11960621	A-G	-	intron	Y53C10A.12	0	0	-	0	0	-	0	0	-	0	0	-	0	0	-	0	0	-	0	0	-	0	0	-	0	0	-	0	0	-
I	11960623	A-G	-	intron	Y53C10A.12	0	0	-	0	0	-	0	0	-	0	0	-	0	0	-	0	0	-	0	0	-	0	0	-	0	0	-	0	0	-
I	11960630	A-G	-	intron	Y53C10A.12	0	0	-	0	0	-	0	0	-	0	0	-	0	0	-	0	0	-	0	0	-	0	0	-	0	0	-	0	0	-
I	11960631	A-G	-	intron	Y53C10A.12	0	0	-	0	0	-	0	0	-	0	0	-	0	0	-	0	0	-	0	0	-	0	0	-	0	0	-	0	0	-
I	11960632	A-G	-	intron	Y53C10A.12	0	0	-	0	0	-	0	0	-	0	0	-	0	0	-	0	0	-	0	0	-	0	0	-	0	0	-	0	0	-
I	11960633	A-G	-	intron	Y53C10A.12	0	0	-	0	0	-	0	0	-	0	0	-	0	0	-	0	0	-	0	0	-	0	0	-	0	0	-	0	0	-
I	11960636	A-G	-	intron	Y53C10A.12	0	0	-	0	0	-	0	0	-	0	0	-	0	0	-	0	0	-	0	0	-	0	0	-	0	0	-	0	0	-
I	11960644	A-G	-	intron	Y53C10A.12	0	0	-	0	0	-	0	0	-	0	0	-	0	0	-	0	0	-	0	0	-	0	0	-	0	0	-	0	0	-
I	11960870	A-G	-	intron	Y53C10A.12	0	0	-	1	0	0	0	0	-	0	0	-	0	0	-	0	0	-	0	0	-	0	0	-	0	0	-	0	0	-
I	11960871	A-G	-	intron	Y53C10A.12	0	0	-	1	0	0	0	0	-	0	0	-	0	0	-	0	0	-	0	0	-	0	0	-	0	0	-	0	0	-
I	11960872	A-G	-	intron	Y53C10A.12	0	0	-	1	0	0	0	0	-	0	0	-	0	0	-	0	0	-	0	0	-	0	0	-	0	0	-	0	0	-
I	11960873	A-G	-	intron	Y53C10A.12	0	0	-	1	0	0	0	0	-	0	0	-	0	0	-	0	0	-	0	0	-	0	0	-	0	0	-	0	0	-
I	11960879	A-G	-	intron	Y53C10A.12	0	0	-	1	0	0	0	0	-	0	0	-	0	0	-	0	0	-	0	0	-	0	0	-	0	0	-	0	0	-
I	11960880	A-G	-	intron	Y53C10A.12	0	0	-	1	0	0	0	0	-	0	0	-	0	0	-	0	0	-	0	0	-	0	0	-	0	0	-	0	0	-
I	11960894	A-G	-	intron	Y53C10A.12	0	0	-	1	0	0	0	0	-	0	0	-	0	0	-	0	0	-	0	0	-	0	0	-	0	0	-	0	0	-
I	11960896	A-G	-	intron	Y53C10A.12	0	0	-	1	0	0	0	0	-	0	0	-	0	0	-	0	0	-	0	0	-	0	0	-	0	0	-	0	0	-
I	11960903	A-G	-	intron	Y53C10A.12	0	0	-	1	0	0	0	0	-	0	0	-	0	0	-	0	0	-	0	0	-	0	0	-	0	0	-	0	0	-
I	11960904	A-G	-	intron	Y53C10A.12	0	0	-	1	0	0	0	0	-	0	0	-	0	0	-	0	0	-	0	0	-	0	0	-	0	0	-	0	0	-
I	11960907	A-G	-	intron	Y53C10A.12	0	0	-	1	0	0	0	0	-	0	0	-	0	0	-	0	0	-	0	0	-	0	0	-	0	0	-	0	0	-
I	11960917	A-G	-	intron	Y53C10A.12	0	0	-	1	0	0	0	0	-	0	0	-	0	0	-	0	0	-	0	0	-	0	0	-	0	0	-	0	0	-
I	11960926	A-G	-	intron	Y53C10A.12	0	0	-	1	0	0	0	0	-	0	0	-	0	0	-	0	0	-	0	0	-	0	0	-	0	0	-	0	0	-
I	11960945	A-G	-	intron	Y53C10A.12	0	0	-	1	0	0	0	0	-	0	0	-	0	0	-	0	0	-	0	0	-	0	0	-	0	0	-	0	0	-
I	11960955	A-G	-	intron	Y53C10A.12	0	0	-	0	0	-	0	0	-	0	0	-	0	0	-	0	0	-	0	0	-	0	0	-	0	0	-	0	0	-
I	11960957	A-G	-	intron	Y53C10A.12	0	0	-	0	0	-	0	0	-	0	0	-	0	0	-	0	0	-	0	0	-	0	0	-	0	0	-	0	0	-
I	1197883	A-G	+	intron	Y48G8AL.5	2	1	0.5	8	5	0.625	0	0	-	0	0	-	2	0	0	1	1	1	0	0	-	1	1	1	0	0	-	1	1	1
I	1197886	A-G	+	intron	Y48G8AL.5	2	0	0	8	3	0.375	1	0	0	0	0	-	2	0	0	1	0	0	0	0	-	1	0	0	0	0	-	1	0	0
I	1197888	A-G	+	intron	Y48G8AL.5	2	0	0	7	2	0.285714	1	0	0	0	0	-	2	0	0	1	1	1	0	0	-	1	0	0	0	0	-	1	1	1
I	1197889	A-G	+	intron	Y48G8AL.5	2	0	0	7	1	0.142857	1	0	0	0	0	-	2	0	0	1	1	1	0	0	-	1	0	0	0	0	-	1	0	0
I	1197893	A-G	+	intron	Y48G8AL.5	2	0	0	8	2	0.25	1	0	0	0	0	-	2	0	0	1	0	0	0	0	-	1	0	0	0	0	-	1	0	0
I	1197896	A-G	+	intron	Y48G8AL.5	2	0	0	8	3	0.375	1	0	0	0	0	-	2	0	0	1	0	0	0	0	-	1	0	0	0	0	-	1	0	0
I	1197899	A-G	+	intron	Y48G8AL.5	2	1	0.5	8	6	0.75	1	0	0	0	0	-	2	0	0	1	1	1	0	0	-	1	0	0	0	0	-	0	0	-
I	1197912	A-G	+	intron	Y48G8AL.5	2	1	0.5	10	8	0.8	1	0	0	0	0	-	2	0	0	1	1	1	0	0	-	1	0	0	0	0	-	1	0	0
I	1197919	A-G	+	intron	Y48G8AL.5	2	1	0.5	10	7	0.7	1	0	0	0	0	-	2	0	0	1	1	1	0	0	-	1	1	1	0	0	-	0	0	-
I	1197920	A-G	+	intron	Y48G8AL.5	2	0	0	10	4	0.4	1	0	0	0	0	-	2	0	0	1	0	0	0	0	-	1	1	1	0	0	-	0	0	-
I	1197921	A-G	+	intron	Y48G8AL.5	2	0	0	10	2	0.2	1	0	0	0	0	-	2	0	0	1	0	0	0	0	-	1	1	1	0	0	-	1	1	1
I	1197924	A-G	+	intron	Y48G8AL.5	2	0	0	10	5	0.5	1	0	0	0	0	-	2	0	0	1	1	1	0	0	-	1	1	1	0	0	-	1	0	0
I	1197925	A-G	+	intron	Y48G8AL.5	2	1	0.5	10	7	0.7	1	1	1	0	0	-	2	0	0	1	1	1	0	0	-	1	0	0	0	0	-	1	0	0
I	1197931	A-G	+	intron	Y48G8AL.5	2	0	0	10	7	0.7	1	0	0	0	0	-	2	0	0	1	1	1	0	0	-	1	0	0	0	0	-	1	1	1
I	1197932	A-G	+	intron	Y48G8AL.5	2	2	1	9	6	0.666667	1	1	1	0	0	-	2	0	0	1	1	1	0	0	-	1	1	1	0	0	-	1	0	0
I	1197935	A-G	+	intron	Y48G8AL.5	2	1	0.5	9	7	0.777778	1	0	0	0	0	-	2	0	0	1	1	1	0	0	-	1	1	1	0	0	-	1	1	1
I	1197936	A-G	+	intron	Y48G8AL.5	2	1	0.5	9	7	0.777778	1	0	0	0	0	-	2	0	0	1	1	1	0	0	-	1	1	1	0	0	-	1	1	1
I	1197937	A-G	+	intron	Y48G8AL.5	2	0	0	9	2	0.222222	1	0	0	0	0	-	2	0	0	1	0	0	0	0	-	1	0	0	0	0	-	1	0	0
I	1197941	A-G	+	intron	Y48G8AL.5	1	0	0	9	1	0.111111	1	0	0	0	0	-	2	0	0	1	1	1	0	0	-	1	0	0	0	0	-	1	0	0
I	1197948	A-G	+	intron	Y48G8AL.5	1	0	0	9	1	0.111111	1	0	0	0	0	-	2	0	0	1	1	1	0	0	-	1	0	0	0	0	-	1	0	0
I	1197959	A-G	+	intron	Y48G8AL.5	1	1	1	4	1	0.25	1	1	1	0	0	-	1	0	0	0	0	-	0	0	-	0	0	-	0	0	-	1	0	0
I	1197960	A-G	+	intron	Y48G8AL.5	1	1	1	4	2	0.5	1	1	1	0	0	-	1	0	0	0	0	-	0	0	-	0	0	-	0	0	-	1	1	1
I	1197979	A-G	+	intron	Y48G8AL.5	0	0	-	3	1	0.333333	1	1	1	0	0	-	1	0	0	0	0	-	0	0	-	0	0	-	0	0	-	0	0	-
I	1197980	A-G	+	intron	Y48G8AL.5	0	0	-	3	1	0.333333	1	1	1	0	0	-	1	0	0	0	0	-	0	0	-	0	0	-	0	0	-	0	0	-
I	1198171	A-G	+	intron	Y48G8AL.5	0	0	-	1	1	1	0	0	-	0	0	-	0	0	-	0	0	-	0	0	-	0	0	-	3	2	0.666667	0	0	-
I	1198172	A-G	+	intron	Y48G8AL.5	0	0	-	1	0	0	0	0	-	0	0	-	0	0	-	0	0	-	0	0	-	0	0	-	3	3	1	0	0	-
I	1198193	A-G	-	intron	null	0	0	-	1	0	0	0	0	-	0	0	-	0	0	-	0	0	-	0	0	-	0	0	-	3	0	0	0	0	-
I	1198194	A-G	+	intron	Y48G8AL.5	0	0	-	1	1	1	0	0	-	0	0	-	0	0	-	0	0	-	0	0	-	0	0	-	3	3	1	0	0	-
I	1198203	A-G	+	intron	Y48G8AL.5	0	0	-	1	1	1	0	0	-	0	0	-	0	0	-	0	0	-	0	0	-	0	0	-	3	3	1	0	0	-
I	1198206	A-G	-	intron	null	0	0	-	1	0	0	0	0	-	0	0	-	0	0	-	0	0	-	0	0	-	0	0	-	3	0	0	0	0	-
I	1198219	A-G	-	intron	null	0	0	-	1	0	0	0	0	-	0	0	-	0	0	-	0	0	-	0	0	-	0	0	-	3	0	0	0	0	-
I	1198220	A-G	+	intron	Y48G8AL.5	0	0	-	1	0	0	0	0	-	0	0	-	0	0	-	0	0	-	0	0	-	0	0	-	3	2	0.666667	0	0	-
I	1198240	A-G	-	intron	null	0	0	-	1	0	0	0	0	-	0	0	-	0	0	-	0	0	-	0	0	-	0	0	-	3	0	0	0	0	-
I	1198241	A-G	-	intron	null	0	0	-	1	0	0	0	0	-	0	0	-	0	0	-	0	0	-	0	0	-	0	0	-	3	0	0	0	0	-
I	1198249	A-G	+	intron	Y48G8AL.5	0	0	-	1	1	1	0	0	-	0	0	-	0	0	-	0	0	-	0	0	-	0	0	-	3	2	0.666667	0	0	-
I	1198254	A-G	+	intron	Y48G8AL.5	0	0	-	1	1	1	0	0	-	0	0	-	0	0	-	0	0	-	0	0	-	0	0	-	3	2	0.666667	0	0	-
I	1198262	A-G	-	intron	null	0	0	-	1	0	0	0	0	-	0	0	-	0	0	-	0	0	-	0	0	-	0	0	-	3	0	0	0	0	-
I	1198284	A-G	+	intron	Y48G8AL.5	0	0	-	1	1	1	0	0	-	0	0	-	0	0	-	0	0	-	0	0	-	0	0	-	3	3	1	0	0	-
I	1198287	A-G	-	intron	null	0	0	-	1	0	0	0	0	-	0	0	-	0	0	-	0	0	-	0	0	-	0	0	-	3	0	0	0	0	-
I	1198297	A-G	-	intron	null	0	0	-	1	0	0	0	0	-	0	0	-	0	0	-	0	0	-	1	0	0	0	0	-	2	0	0	0	0	-
I	1198308	A-G	-	intron	null	0	0	-	1	0	0	0	0	-	0	0	-	0	0	-	0	0	-	1	0	0	0	0	-	1	0	0	0	0	-
I	1198318	A-G	+	intron	Y48G8AL.5	0	0	-	2	2	1	1	0	0	0	0	-	0	0	-	1	1	1	1	1	1	2	2	1	0	0	-	0	0	-
I	1198320	A-G	+	intron	Y48G8AL.5	0	0	-	2	1	0.5	1	0	0	0	0	-	0	0	-	1	1	1	1	0	0	2	0	0	0	0	-	0	0	-
I	1198323	A-G	-	intron	null	0	0	-	2	0	0	1	0	0	0	0	-	0	0	-	1	0	0	1	0	0	2	0	0	0	0	-	0	0	-
I	1198331	A-G	-	intron	null	0	0	-	4	0	0	2	0	0	0	0	-	0	0	-	1	0	0	1	0	0	2	0	0	0	0	-	2	0	0
I	1198342	A-G	-	intron	null	0	0	-	4	0	0	2	0	0	0	0	-	0	0	-	1	0	0	1	0	0	2	0	0	1	0	0	3	0	0
I	1198344	A-G	+	intron	Y48G8AL.5	0	0	-	4	4	1	2	2	1	0	0	-	0	0	-	1	1	1	1	1	1	2	2	1	1	1	1	3	2	0.666667
I	1198347	A-G	-	intron	null	0	0	-	4	0	0	2	0	0	0	0	-	0	0	-	1	0	0	1	0	0	2	0	0	1	0	0	3	0	0
I	1198348	A-G	-	intron	null	0	0	-	4	0	0	2	0	0	0	0	-	0	0	-	1	0	0	1	0	0	2	0	0	1	0	0	3	0	0
I	1198349	A-G	+	intron	Y48G8AL.5	0	0	-	4	4	1	2	2	1	0	0	-	0	0	-	1	1	1	1	0	0	2	1	0.5	1	1	1	3	2	0.666667
I	1198355	A-G	+	intron	Y48G8AL.5	0	0	-	4	4	1	2	2	1	0	0	-	0	0	-	1	1	1	1	1	1	3	2	0.666667	1	1	1	4	4	1
I	1198358	A-G	+	intron	Y48G8AL.5	0	0	-	4	3	0.75	2	2	1	0	0	-	0	0	-	1	1	1	1	0	0	3	1	0.333333	2	0	0	4	1	0.25
I	1198359	A-G	+	intron	Y48G8AL.5	1	1	1	4	2	0.5	2	1	0.5	0	0	-	0	0	-	1	1	1	1	0	0	3	1	0.333333	2	0	0	4	1	0.25
I	1198360	A-G	+	intron	Y48G8AL.5	1	0	0	4	1	0.25	2	1	0.5	0	0	-	0	0	-	1	0	0	1	0	0	3	1	0.333333	2	0	0	4	0	0
I	1198361	A-G	+	intron	Y48G8AL.5	1	0	0	4	1	0.25	2	1	0.5	0	0	-	0	0	-	1	0	0	1	0	0	3	1	0.333333	2	1	0.5	4	4	1
I	1198362	A-G	+	intron	Y48G8AL.5	1	0	0	5	4	0.8	2	1	0.5	0	0	-	0	0	-	1	1	1	1	1	1	3	1	0.333333	2	1	0.5	4	4	1
I	1198363	A-G	+	intron	Y48G8AL.5	1	0	0	5	5	1	2	2	1	0	0	-	0	0	-	1	1	1	1	1	1	3	3	1	2	1	0.5	4	4	1
I	1198365	A-G	+	intron	Y48G8AL.5	1	0	0	5	1	0.2	2	0	0	0	0	-	0	0	-	1	1	1	1	0	0	4	2	0.5	2	0	0	4	3	0.75
I	1198369	A-G	+	intron	Y48G8AL.5	1	0	0	6	4	0.666667	2	2	1	0	0	-	0	0	-	1	1	1	1	0	0	4	1	0.25	2	1	0.5	4	4	1
I	1198370	A-G	-	intron	null	1	0	0	6	0	0	2	0	0	0	0	-	0	0	-	1	0	0	1	0	0	4	0	0	2	0	0	4	0	0
I	1198372	A-G	-	intron	null	1	0	0	6	0	0	2	0	0	0	0	-	0	0	-	1	0	0	1	0	0	4	0	0	2	0	0	4	0	0
I	1198376	A-G	+	intron	Y48G8AL.5	1	0	0	6	1	0.166667	2	1	0.5	0	0	-	0	0	-	1	0	0	1	0	0	4	1	0.25	2	0	0	4	1	0.25
I	1198385	A-G	+	intron	Y48G8AL.5	1	0	0	6	5	0.833333	2	1	0.5	0	0	-	0	0	-	1	1	1	1	0	0	4	4	1	2	1	0.5	4	4	1
I	1198386	A-G	+	intron	Y48G8AL.5	1	0	0	6	6	1	2	1	0.5	0	0	-	0	0	-	1	1	1	1	0	0	4	2	0.5	2	1	0.5	4	3	0.75
I	11996877	A-G	+	upstream	Y53C10A.20	0	0	-	3	2	0.666667	0	0	-	1	0	0	0	0	-	0	0	-	0	0	-	0	0	-	0	0	-	0	0	-
I	11996879	A-G	+	upstream	Y53C10A.20	0	0	-	3	2	0.666667	0	0	-	1	1	1	0	0	-	0	0	-	0	0	-	0	0	-	0	0	-	0	0	-
I	11996884	A-G	+	upstream	Y53C10A.20	0	0	-	3	2	0.666667	0	0	-	1	0	0	0	0	-	0	0	-	0	0	-	0	0	-	0	0	-	0	0	-
I	11996889	A-G	+	upstream	Y53C10A.20	0	0	-	3	2	0.666667	0	0	-	1	1	1	0	0	-	0	0	-	0	0	-	0	0	-	0	0	-	0	0	-
I	11996907	A-G	+	upstream	Y53C10A.20	0	0	-	2	1	0.5	0	0	-	1	1	1	0	0	-	0	0	-	0	0	-	0	0	-	0	0	-	0	0	-
I	11996911	A-G	+	upstream	Y53C10A.20	0	0	-	2	2	1	0	0	-	1	1	1	0	0	-	0	0	-	0	0	-	0	0	-	0	0	-	0	0	-
I	11996955	A-G	+	upstream	Y53C10A.20	0	0	-	2	1	0.5	0	0	-	1	1	1	0	0	-	0	0	-	0	0	-	0	0	-	0	0	-	0	0	-
I	11996956	A-G	+	upstream	Y53C10A.20	0	0	-	1	1	1	0	0	-	1	1	1	0	0	-	0	0	-	0	0	-	0	0	-	0	0	-	0	0	-
I	11996967	A-G	+	noncoding	Y53C10A.20	0	0	-	2	1	0.5	0	0	-	1	1	1	0	0	-	0	0	-	0	0	-	0	0	-	0	0	-	0	0	-
I	1201668	A-G	+	intron	Y48G8AL.5	0	0	-	0	0	-	0	0	-	0	0	-	0	0	-	0	0	-	1	1	1	0	0	-	1	1	1	1	1	1
I	1201685	A-G	+	intron	Y48G8AL.5	0	0	-	0	0	-	0	0	-	0	0	-	0	0	-	0	0	-	1	1	1	0	0	-	1	0	0	1	1	1
I	1201729	A-G	+	intron	Y48G8AL.5	0	0	-	0	0	-	0	0	-	0	0	-	0	0	-	0	0	-	1	1	1	0	0	-	1	0	0	1	1	1
I	1201747	A-G	+	intron	Y48G8AL.5	0	0	-	0	0	-	0	0	-	0	0	-	0	0	-	0	0	-	1	1	1	0	0	-	0	0	-	1	1	1
I	1202808	A-G	+	intron	Y48G8AL.5	0	0	-	0	0	-	0	0	-	0	0	-	0	0	-	0	0	-	0	0	-	1	1	1	1	1	1	0	0	-
I	1202814	A-G	+	intron	Y48G8AL.5	0	0	-	0	0	-	0	0	-	0	0	-	0	0	-	0	0	-	0	0	-	1	1	1	1	1	1	0	0	-
I	1202823	A-G	+	intron	Y48G8AL.5	0	0	-	0	0	-	0	0	-	0	0	-	0	0	-	0	0	-	0	0	-	1	1	1	1	1	1	0	0	-
I	1202845	A-G	+	intron	Y48G8AL.5	0	0	-	0	0	-	0	0	-	0	0	-	0	0	-	0	0	-	0	0	-	2	1	0.5	1	1	1	0	0	-
I	1202860	A-G	+	intron	Y48G8AL.5	0	0	-	0	0	-	0	0	-	0	0	-	0	0	-	0	0	-	0	0	-	2	2	1	1	0	0	0	0	-
I	1202907	A-G	+	intron	Y48G8AL.5	0	0	-	0	0	-	0	0	-	0	0	-	0	0	-	0	0	-	0	0	-	1	1	1	1	1	1	0	0	-
I	1202935	A-G	+	intron	Y48G8AL.5	0	0	-	0	0	-	0	0	-	0	0	-	0	0	-	0	0	-	0	0	-	1	1	1	1	1	1	0	0	-
I	1202936	A-G	+	intron	Y48G8AL.5	0	0	-	0	0	-	0	0	-	0	0	-	0	0	-	0	0	-	0	0	-	1	1	1	1	1	1	0	0	-
I	1202966	A-G	+	intron	Y48G8AL.5	1	0	0	0	0	-	0	0	-	0	0	-	0	0	-	0	0	-	0	0	-	1	1	1	1	1	1	0	0	-
I	1203963	A-G	+	intron	Y48G8AL.5	1	1	1	0	0	-	0	0	-	0	0	-	1	0	0	2	2	1	0	0	-	0	0	-	1	1	1	0	0	-
I	1203964	A-G	+	intron	Y48G8AL.5	1	1	1	0	0	-	0	0	-	0	0	-	1	0	0	2	2	1	0	0	-	0	0	-	1	1	1	0	0	-
I	1203979	A-G	+	intron	Y48G8AL.5	1	1	1	0	0	-	0	0	-	0	0	-	0	0	-	2	1	0.5	0	0	-	0	0	-	1	0	0	0	0	-
I	1204002	A-G	+	intron	Y48G8AL.5	1	1	1	0	0	-	0	0	-	0	0	-	1	0	0	0	0	-	0	0	-	1	1	1	1	1	1	0	0	-
I	1204005	A-G	+	intron	Y48G8AL.5	1	0	0	0	0	-	0	0	-	0	0	-	1	0	0	0	0	-	0	0	-	1	1	1	1	1	1	0	0	-
I	1204031	A-G	+	intron	Y48G8AL.5	1	1	1	0	0	-	0	0	-	0	0	-	1	0	0	0	0	-	0	0	-	1	1	1	1	1	1	0	0	-
I	1204032	A-G	+	intron	Y48G8AL.5	1	0	0	0	0	-	0	0	-	0	0	-	1	0	0	0	0	-	0	0	-	1	1	1	1	1	1	0	0	-
I	1204039	A-G	+	intron	Y48G8AL.5	1	1	1	0	0	-	0	0	-	0	0	-	1	0	0	0	0	-	0	0	-	1	1	1	1	1	1	0	0	-
I	1204053	A-G	+	intron	Y48G8AL.5	1	0	0	0	0	-	0	0	-	0	0	-	1	0	0	0	0	-	0	0	-	1	1	1	1	1	1	0	0	-
I	1204065	A-G	+	intron	Y48G8AL.5	1	1	1	0	0	-	0	0	-	0	0	-	1	0	0	0	0	-	0	0	-	1	1	1	1	1	1	0	0	-
I	1204066	A-G	+	intron	Y48G8AL.5	1	1	1	0	0	-	0	0	-	0	0	-	1	0	0	0	0	-	0	0	-	1	1	1	1	1	1	0	0	-
I	12043071	A-G	+	downstream	F58D5.5	119	0	0	123	3	0.0243902	44	0	0	11	0	0	22	0	0	93	2	0.0215054	110	3	0.0272727	356	24	0.0674157	53	0	0	15	0	0
I	12043081	A-G	+	downstream	F58D5.5	119	2	0.0168067	122	6	0.0491803	44	1	0.0227273	11	0	0	22	0	0	95	8	0.0842105	112	10	0.0892857	355	53	0.149296	53	3	0.0566038	15	0	0
I	12043840	A-G	+	noncoding	null	21	1	0.047619	19	0	0	10	1	0.1	4	0	0	1	0	0	6	3	0.5	13	0	0	16	0	0	5	0	0	0	0	-
I	12043880	A-G	+	noncoding	null	6	3	0.5	5	2	0.4	1	1	1	3	2	0.666667	1	0	0	0	0	-	2	1	0.5	2	1	0.5	2	0	0	0	0	-
I	12043932	A-G	+	downstream	null	21	0	0	10	1	0.1	1	1	1	4	1	0.25	1	0	0	1	0	0	10	0	0	10	0	0	2	0	0	0	0	-
I	1204467	A-G	+	intron	Y48G8AL.5	0	0	-	0	0	-	0	0	-	2	1	0.5	0	0	-	1	1	1	0	0	-	2	0	0	0	0	-	0	0	-
I	1204471	A-G	+	intron	Y48G8AL.5	0	0	-	0	0	-	0	0	-	2	1	0.5	0	0	-	2	2	1	0	0	-	2	0	0	0	0	-	0	0	-
I	1204488	A-G	+	intron	Y48G8AL.5	0	0	-	0	0	-	0	0	-	2	1	0.5	0	0	-	2	2	1	0	0	-	3	0	0	0	0	-	0	0	-
I	1204528	A-G	+	intron	Y48G8AL.5	0	0	-	0	0	-	0	0	-	2	1	0.5	0	0	-	2	2	1	0	0	-	4	0	0	0	0	-	0	0	-
I	1204541	A-G	+	intron	Y48G8AL.5	0	0	-	0	0	-	0	0	-	1	1	1	0	0	-	2	2	1	0	0	-	4	0	0	0	0	-	0	0	-
I	1204548	A-G	+	intron	Y48G8AL.5	0	0	-	0	0	-	0	0	-	1	1	1	0	0	-	2	2	1	0	0	-	4	0	0	0	0	-	0	0	-
I	1204549	A-G	+	intron	Y48G8AL.5	0	0	-	0	0	-	0	0	-	1	1	1	0	0	-	2	1	0.5	0	0	-	4	0	0	0	0	-	0	0	-
I	12048489	A-G	-	intron	F58D5.4	0	0	-	0	0	-	0	0	-	0	0	-	0	0	-	0	0	-	0	0	-	0	0	-	0	0	-	0	0	-
I	12048498	A-G	-	intron	F58D5.4	0	0	-	0	0	-	0	0	-	0	0	-	0	0	-	0	0	-	0	0	-	0	0	-	0	0	-	0	0	-
I	12048518	A-G	-	intron	F58D5.4	0	0	-	0	0	-	0	0	-	0	0	-	0	0	-	0	0	-	0	0	-	0	0	-	0	0	-	0	0	-
I	12048524	A-G	-	intron	F58D5.4	0	0	-	0	0	-	0	0	-	0	0	-	0	0	-	0	0	-	0	0	-	0	0	-	0	0	-	0	0	-
I	12048525	A-G	-	intron	F58D5.4	0	0	-	0	0	-	0	0	-	0	0	-	0	0	-	0	0	-	0	0	-	0	0	-	0	0	-	0	0	-
I	12048539	A-G	-	intron	F58D5.4	0	0	-	0	0	-	0	0	-	0	0	-	0	0	-	0	0	-	0	0	-	0	0	-	0	0	-	0	0	-
I	12048543	A-G	-	intron	F58D5.4	0	0	-	0	0	-	0	0	-	0	0	-	0	0	-	0	0	-	0	0	-	0	0	-	0	0	-	0	0	-
I	12048544	A-G	-	intron	F58D5.4	0	0	-	0	0	-	0	0	-	0	0	-	0	0	-	0	0	-	0	0	-	0	0	-	0	0	-	0	0	-
I	12048560	A-G	-	intron	F58D5.4	0	0	-	0	0	-	0	0	-	0	0	-	0	0	-	0	0	-	0	0	-	0	0	-	0	0	-	0	0	-
I	12048636	A-G	-	intron	F58D5.4	0	0	-	0	0	-	0	0	-	0	0	-	0	0	-	0	0	-	0	0	-	0	0	-	0	0	-	0	0	-
I	12048786	A-G	+	antisense	F58D5.4	1	1	1	2	1	0.5	0	0	-	0	0	-	0	0	-	0	0	-	1	1	1	0	0	-	0	0	-	0	0	-
I	12048795	A-G	+	antisense	F58D5.4	1	1	1	2	1	0.5	0	0	-	0	0	-	0	0	-	0	0	-	1	0	0	0	0	-	0	0	-	0	0	-
I	12048806	A-G	+	antisense	F58D5.4	1	1	1	2	1	0.5	0	0	-	0	0	-	0	0	-	0	0	-	1	1	1	0	0	-	0	0	-	0	0	-
I	12048923	A-G	+	antisense	F58D5.4	0	0	-	0	0	-	0	0	-	0	0	-	0	0	-	0	0	-	2	2	1	0	0	-	0	0	-	0	0	-
I	12049048	A-G	+	antisense	F58D5.4	1	0	0	2	2	1	0	0	-	0	0	-	0	0	-	0	0	-	2	0	0	2	0	0	0	0	-	0	0	-
I	12049053	A-G	+	antisense	F58D5.4	1	1	1	2	2	1	0	0	-	0	0	-	0	0	-	0	0	-	2	2	1	2	1	0.5	0	0	-	0	0	-
I	12049062	A-G	+	antisense	F58D5.4	1	1	1	2	2	1	0	0	-	0	0	-	0	0	-	0	0	-	4	4	1	2	2	1	0	0	-	0	0	-
I	12049066	A-G	+	antisense	F58D5.4	1	0	0	2	0	0	0	0	-	0	0	-	0	0	-	0	0	-	4	2	0.5	2	1	0.5	0	0	-	0	0	-
I	12049067	A-G	+	antisense	F58D5.4	1	0	0	2	2	1	0	0	-	0	0	-	0	0	-	0	0	-	4	0	0	2	1	0.5	0	0	-	0	0	-
I	12049075	A-G	+	antisense	F58D5.4	1	1	1	2	2	1	0	0	-	0	0	-	0	0	-	0	0	-	4	2	0.5	2	1	0.5	0	0	-	0	0	-
I	12049084	A-G	+	antisense	F58D5.4	1	0	0	2	1	0.5	0	0	-	0	0	-	0	0	-	0	0	-	4	1	0.25	2	2	1	0	0	-	0	0	-
I	12049102	A-G	+	antisense	F58D5.4	1	0	0	2	2	1	0	0	-	0	0	-	0	0	-	0	0	-	4	3	0.75	2	2	1	0	0	-	0	0	-
I	12049289	A-G	-	intron	F58D5.4	1	0	0	0	0	-	0	0	-	0	0	-	0	0	-	0	0	-	1	0	0	1	0	0	0	0	-	1	0	0
I	12049305	A-G	+	antisense	F58D5.4	2	1	0.5	0	0	-	0	0	-	0	0	-	0	0	-	0	0	-	1	1	1	1	1	1	0	0	-	1	1	1
I	12049306	A-G	+	antisense	F58D5.4	2	1	0.5	0	0	-	0	0	-	0	0	-	0	0	-	0	0	-	1	1	1	1	0	0	0	0	-	1	1	1
I	12049311	A-G	-	intron	F58D5.4	2	0	0	0	0	-	0	0	-	0	0	-	0	0	-	0	0	-	1	0	0	1	0	0	0	0	-	1	0	0
I	12049320	A-G	-	intron	F58D5.4	2	0	0	0	0	-	0	0	-	0	0	-	0	0	-	0	0	-	1	0	0	1	0	0	0	0	-	1	0	0
I	12049321	A-G	-	intron	F58D5.4	1	0	0	0	0	-	0	0	-	0	0	-	0	0	-	0	0	-	1	0	0	1	0	0	0	0	-	1	0	0
I	12049368	A-G	-	intron	F58D5.4	2	0	0	0	0	-	0	0	-	0	0	-	0	0	-	0	0	-	1	0	0	1	0	0	0	0	-	1	0	0
I	12049534	A-G	-	intron	F58D5.4	0	0	-	2	0	0	0	0	-	0	0	-	0	0	-	1	0	0	0	0	-	0	0	-	0	0	-	0	0	-
I	12049558	A-G	+	antisense	F58D5.4	0	0	-	2	2	1	0	0	-	0	0	-	0	0	-	1	1	1	0	0	-	1	0	0	0	0	-	0	0	-
I	12049559	A-G	+	antisense	F58D5.4	0	0	-	2	2	1	0	0	-	0	0	-	0	0	-	1	1	1	0	0	-	1	0	0	0	0	-	0	0	-
I	12049561	A-G	-	intron	F58D5.4	0	0	-	2	0	0	0	0	-	0	0	-	0	0	-	1	0	0	0	0	-	1	0	0	0	0	-	0	0	-
I	12049562	A-G	-	intron	F58D5.4	0	0	-	2	0	0	0	0	-	0	0	-	0	0	-	1	0	0	0	0	-	1	0	0	0	0	-	0	0	-
I	12049563	A-G	+	antisense	F58D5.4	0	0	-	2	2	1	0	0	-	0	0	-	0	0	-	1	1	1	0	0	-	1	0	0	0	0	-	0	0	-
I	12049567	A-G	+	antisense	F58D5.4	0	0	-	2	1	0.5	0	0	-	0	0	-	0	0	-	1	1	1	0	0	-	1	0	0	0	0	-	0	0	-
I	12049569	A-G	+	antisense	F58D5.4	0	0	-	2	2	1	0	0	-	0	0	-	0	0	-	1	1	1	0	0	-	1	1	1	0	0	-	0	0	-
I	12049570	A-G	+	antisense	F58D5.4	0	0	-	2	2	1	0	0	-	0	0	-	0	0	-	1	1	1	0	0	-	1	1	1	0	0	-	0	0	-
I	12049576	A-G	+	antisense	F58D5.4	0	0	-	2	1	0.5	0	0	-	0	0	-	0	0	-	1	1	1	0	0	-	1	0	0	0	0	-	0	0	-
I	12049579	A-G	+	antisense	F58D5.4	0	0	-	2	2	1	0	0	-	0	0	-	0	0	-	1	1	1	0	0	-	1	1	1	0	0	-	0	0	-
I	12049580	A-G	+	antisense	F58D5.4	0	0	-	2	2	1	0	0	-	0	0	-	0	0	-	1	1	1	0	0	-	1	1	1	0	0	-	0	0	-
I	12049586	A-G	+	antisense	F58D5.4	0	0	-	2	2	1	0	0	-	0	0	-	0	0	-	1	1	1	0	0	-	1	0	0	0	0	-	0	0	-
I	12049587	A-G	+	antisense	F58D5.4	0	0	-	2	1	0.5	0	0	-	0	0	-	0	0	-	1	1	1	0	0	-	1	1	1	0	0	-	0	0	-
I	12049604	A-G	+	antisense	F58D5.4	0	0	-	2	2	1	0	0	-	0	0	-	0	0	-	1	0	0	0	0	-	1	0	0	0	0	-	0	0	-
I	12049616	A-G	+	antisense	F58D5.4	0	0	-	2	2	1	0	0	-	0	0	-	0	0	-	1	0	0	0	0	-	1	1	1	0	0	-	0	0	-
I	12049662	A-G	+	antisense	F58D5.4	0	0	-	2	1	0.5	0	0	-	0	0	-	0	0	-	1	1	1	0	0	-	0	0	-	0	0	-	0	0	-
I	12049666	A-G	+	antisense	F58D5.4	0	0	-	2	1	0.5	0	0	-	0	0	-	0	0	-	1	1	1	0	0	-	0	0	-	0	0	-	0	0	-
I	12049719	A-G	+	antisense	F58D5.4	1	0	0	3	2	0.666667	0	0	-	0	0	-	0	0	-	0	0	-	0	0	-	1	0	0	0	0	-	0	0	-
I	12049729	A-G	+	antisense	F58D5.4	2	1	0.5	3	1	0.333333	0	0	-	0	0	-	0	0	-	0	0	-	0	0	-	1	1	1	0	0	-	0	0	-
I	12049755	A-G	+	antisense	F58D5.4	2	2	1	3	1	0.333333	0	0	-	0	0	-	0	0	-	1	0	0	2	1	0.5	1	1	1	0	0	-	0	0	-
I	12049802	A-G	+	antisense	F58D5.4	4	3	0.75	3	1	0.333333	0	0	-	0	0	-	0	0	-	1	1	1	2	0	0	1	0	0	0	0	-	0	0	-
I	12049818	A-G	+	antisense	F58D5.4	4	1	0.25	3	0	0	0	0	-	0	0	-	0	0	-	1	1	1	2	1	0.5	1	0	0	0	0	-	0	0	-
I	12049819	A-G	+	antisense	F58D5.4	4	2	0.5	3	2	0.666667	0	0	-	0	0	-	0	0	-	1	0	0	2	1	0.5	1	1	1	0	0	-	0	0	-
I	12049820	A-G	+	antisense	F58D5.4	4	1	0.25	3	1	0.333333	0	0	-	0	0	-	0	0	-	1	0	0	2	0	0	1	0	0	0	0	-	0	0	-
I	12049832	A-G	-	intron	F58D5.4	4	0	0	3	0	0	0	0	-	0	0	-	0	0	-	1	0	0	2	0	0	1	0	0	0	0	-	0	0	-
I	12049834	A-G	-	intron	F58D5.4	4	0	0	3	0	0	0	0	-	0	0	-	0	0	-	1	0	0	2	0	0	1	0	0	0	0	-	0	0	-
I	12049835	A-G	-	intron	F58D5.4	4	0	0	3	0	0	0	0	-	0	0	-	0	0	-	1	0	0	2	0	0	1	0	0	0	0	-	0	0	-
I	12049836	A-G	-	intron	F58D5.4	4	0	0	3	0	0	0	0	-	0	0	-	0	0	-	1	0	0	2	0	0	1	0	0	0	0	-	0	0	-
I	12049837	A-G	-	intron	F58D5.4	4	0	0	3	0	0	0	0	-	0	0	-	0	0	-	1	0	0	2	0	0	1	0	0	0	0	-	0	0	-
I	12049840	A-G	-	intron	F58D5.4	4	0	0	3	0	0	0	0	-	0	0	-	0	0	-	1	0	0	2	0	0	1	0	0	0	0	-	0	0	-
I	12049841	A-G	-	intron	F58D5.4	5	0	0	3	0	0	0	0	-	0	0	-	0	0	-	1	0	0	2	0	0	1	0	0	0	0	-	0	0	-
I	12049847	A-G	-	intron	F58D5.4	5	0	0	4	0	0	0	0	-	0	0	-	0	0	-	1	0	0	2	0	0	2	0	0	1	0	0	0	0	-
I	12049848	A-G	-	intron	F58D5.4	5	0	0	4	0	0	0	0	-	0	0	-	0	0	-	1	0	0	2	0	0	2	0	0	1	0	0	0	0	-
I	12049851	A-G	-	intron	F58D5.4	5	0	0	4	0	0	0	0	-	0	0	-	0	0	-	1	0	0	2	0	0	2	0	0	1	0	0	0	0	-
I	12049854	A-G	-	intron	F58D5.4	5	0	0	4	0	0	0	0	-	0	0	-	0	0	-	1	0	0	2	0	0	2	0	0	1	0	0	0	0	-
I	12049857	A-G	-	intron	F58D5.4	5	0	0	4	0	0	0	0	-	0	0	-	0	0	-	1	0	0	2	0	0	2	0	0	1	0	0	0	0	-
I	12049858	A-G	-	intron	F58D5.4	5	0	0	4	0	0	0	0	-	0	0	-	0	0	-	1	0	0	2	0	0	2	0	0	1	0	0	0	0	-
I	12049859	A-G	+	antisense	F58D5.4	5	2	0.4	4	1	0.25	0	0	-	0	0	-	0	0	-	1	0	0	2	1	0.5	2	0	0	1	0	0	0	0	-
I	12049860	A-G	-	intron	F58D5.4	5	0	0	4	0	0	0	0	-	0	0	-	0	0	-	1	0	0	2	0	0	2	0	0	1	0	0	0	0	-
I	12049865	A-G	+	antisense	F58D5.4	5	5	1	4	4	1	0	0	-	0	0	-	0	0	-	1	0	0	2	1	0.5	2	1	0.5	2	2	1	0	0	-
I	12049866	A-G	+	antisense	F58D5.4	5	3	0.6	4	2	0.5	0	0	-	0	0	-	0	0	-	1	0	0	2	1	0.5	2	2	1	2	2	1	0	0	-
I	12062674	A-G	+	downstream	F58D5.10	0	0	-	0	0	-	0	0	-	0	0	-	0	0	-	0	0	-	0	0	-	4	3	0.75	0	0	-	0	0	-
I	12062684	A-G	+	downstream	F58D5.10	0	0	-	0	0	-	0	0	-	0	0	-	0	0	-	0	0	-	0	0	-	4	2	0.5	0	0	-	0	0	-
I	12062685	A-G	+	downstream	F58D5.10	0	0	-	0	0	-	0	0	-	0	0	-	0	0	-	0	0	-	0	0	-	4	3	0.75	0	0	-	0	0	-
I	12062690	A-G	+	downstream	F58D5.10	0	0	-	0	0	-	0	0	-	0	0	-	0	0	-	0	0	-	0	0	-	4	2	0.5	0	0	-	0	0	-
I	12062699	A-G	+	downstream	F58D5.10	0	0	-	0	0	-	0	0	-	0	0	-	0	0	-	0	0	-	0	0	-	4	3	0.75	0	0	-	0	0	-
I	12062700	A-G	+	downstream	F58D5.10	0	0	-	0	0	-	0	0	-	0	0	-	0	0	-	0	0	-	0	0	-	4	4	1	0	0	-	0	0	-
I	12073168	A-G	+	downstream	F58D5.3	0	0	-	4	2	0.5	0	0	-	0	0	-	0	0	-	0	0	-	0	0	-	3	0	0	0	0	-	0	0	-
I	12073179	A-G	+	downstream	F58D5.3	0	0	-	4	3	0.75	0	0	-	0	0	-	0	0	-	0	0	-	0	0	-	3	1	0.333333	0	0	-	0	0	-
I	12073182	A-G	+	downstream	F58D5.3	0	0	-	4	3	0.75	0	0	-	0	0	-	0	0	-	0	0	-	0	0	-	2	1	0.5	0	0	-	0	0	-
I	12073205	A-G	+	downstream	F58D5.3	0	0	-	4	3	0.75	0	0	-	0	0	-	0	0	-	0	0	-	0	0	-	3	3	1	0	0	-	0	0	-
I	12073206	A-G	+	downstream	F58D5.3	0	0	-	4	3	0.75	0	0	-	0	0	-	0	0	-	0	0	-	0	0	-	3	3	1	0	0	-	0	0	-
I	12073212	A-G	+	downstream	F58D5.3	0	0	-	4	2	0.5	0	0	-	0	0	-	0	0	-	0	0	-	0	0	-	2	1	0.5	0	0	-	0	0	-
I	12073217	A-G	+	downstream	F58D5.3	0	0	-	4	3	0.75	0	0	-	0	0	-	0	0	-	0	0	-	0	0	-	2	0	0	0	0	-	0	0	-
I	12073224	A-G	+	downstream	F58D5.3	0	0	-	4	3	0.75	0	0	-	0	0	-	0	0	-	0	0	-	0	0	-	2	1	0.5	0	0	-	0	0	-
I	12073236	A-G	+	downstream	F58D5.3	0	0	-	4	3	0.75	0	0	-	0	0	-	0	0	-	0	0	-	0	0	-	1	0	0	0	0	-	0	0	-
I	12073237	A-G	+	downstream	F58D5.3	0	0	-	4	2	0.5	0	0	-	0	0	-	0	0	-	0	0	-	0	0	-	1	0	0	0	0	-	0	0	-
I	12073252	A-G	+	downstream	F58D5.3	0	0	-	4	3	0.75	0	0	-	0	0	-	0	0	-	0	0	-	0	0	-	1	0	0	0	0	-	0	0	-
I	12073259	A-G	+	downstream	F58D5.3	0	0	-	4	3	0.75	0	0	-	0	0	-	0	0	-	0	0	-	0	0	-	2	1	0.5	0	0	-	0	0	-
I	12073265	A-G	+	downstream	F58D5.3	0	0	-	4	2	0.5	0	0	-	0	0	-	0	0	-	0	0	-	0	0	-	2	0	0	0	0	-	0	0	-
I	12073266	A-G	+	downstream	F58D5.3	0	0	-	3	2	0.666667	0	0	-	0	0	-	0	0	-	0	0	-	0	0	-	1	0	0	0	0	-	0	0	-
I	12073268	A-G	+	downstream	F58D5.3	0	0	-	3	2	0.666667	0	0	-	0	0	-	0	0	-	0	0	-	0	0	-	1	0	0	0	0	-	0	0	-
I	12073273	A-G	+	downstream	F58D5.3	0	0	-	3	2	0.666667	0	0	-	0	0	-	0	0	-	0	0	-	0	0	-	2	1	0.5	0	0	-	0	0	-
I	12073279	A-G	+	downstream	F58D5.3	0	0	-	3	2	0.666667	0	0	-	0	0	-	0	0	-	0	0	-	0	0	-	2	1	0.5	0	0	-	0	0	-
I	12073280	A-G	+	downstream	F58D5.3	0	0	-	3	2	0.666667	0	0	-	0	0	-	0	0	-	0	0	-	0	0	-	2	2	1	0	0	-	0	0	-
I	12073664	A-G	+	downstream	F58D5.3	0	0	-	1	1	1	0	0	-	0	0	-	0	0	-	0	0	-	0	0	-	2	2	1	0	0	-	0	0	-
I	12073682	A-G	+	downstream	F58D5.3	0	0	-	0	0	-	0	0	-	0	0	-	0	0	-	0	0	-	0	0	-	2	2	1	0	0	-	0	0	-
I	12073683	A-G	+	downstream	F58D5.3	0	0	-	0	0	-	0	0	-	0	0	-	0	0	-	0	0	-	0	0	-	2	2	1	0	0	-	0	0	-
I	12073759	A-G	+	downstream	F58D5.3	0	0	-	3	2	0.666667	0	0	-	0	0	-	0	0	-	0	0	-	0	0	-	0	0	-	0	0	-	0	0	-
I	12073764	A-G	+	downstream	F58D5.3	0	0	-	3	2	0.666667	0	0	-	0	0	-	0	0	-	0	0	-	0	0	-	0	0	-	0	0	-	0	0	-
I	12073774	A-G	+	downstream	F58D5.3	0	0	-	3	2	0.666667	0	0	-	0	0	-	0	0	-	0	0	-	0	0	-	0	0	-	0	0	-	0	0	-
I	12073790	A-G	-	intron	Y47H10A.1	0	0	-	2	0	0	0	0	-	0	0	-	0	0	-	0	0	-	0	0	-	0	0	-	0	0	-	0	0	-
I	12073804	A-G	-	intron	Y47H10A.1	0	0	-	2	0	0	0	0	-	0	0	-	0	0	-	0	0	-	0	0	-	0	0	-	0	0	-	0	0	-
I	12073805	A-G	-	intron	Y47H10A.1	0	0	-	2	0	0	0	0	-	0	0	-	0	0	-	0	0	-	0	0	-	0	0	-	0	0	-	0	0	-
I	12073835	A-G	+	downstream	F58D5.3	0	0	-	2	2	1	0	0	-	0	0	-	0	0	-	0	0	-	0	0	-	0	0	-	0	0	-	0	0	-
I	12073836	A-G	+	downstream	F58D5.3	0	0	-	2	2	1	0	0	-	0	0	-	0	0	-	0	0	-	0	0	-	0	0	-	0	0	-	0	0	-
I	12073847	A-G	+	downstream	F58D5.3	0	0	-	2	2	1	0	0	-	0	0	-	0	0	-	0	0	-	0	0	-	0	0	-	0	0	-	0	0	-
I	12073858	A-G	-	intron	Y47H10A.1	0	0	-	2	0	0	0	0	-	0	0	-	0	0	-	0	0	-	0	0	-	0	0	-	0	0	-	0	0	-
I	12073868	A-G	+	downstream	F58D5.3	0	0	-	2	2	1	0	0	-	0	0	-	0	0	-	0	0	-	0	0	-	0	0	-	0	0	-	0	0	-
I	12073888	A-G	-	intron	Y47H10A.1	0	0	-	2	0	0	0	0	-	0	0	-	0	0	-	0	0	-	0	0	-	0	0	-	0	0	-	0	0	-
I	12073891	A-G	-	intron	Y47H10A.1	0	0	-	3	0	0	0	0	-	0	0	-	0	0	-	0	0	-	0	0	-	0	0	-	0	0	-	0	0	-
I	12076027	A-G	+	upstream	Y47H10A.6	0	0	-	1	0	0	0	0	-	0	0	-	0	0	-	0	0	-	0	0	-	4	4	1	0	0	-	0	0	-
[truncated: 45,734 more rows]

## Sheet: Revised Supplemental Table 4
corrected on 2015/1/26						Wild type																		adr-1
						Embryo			L1			L2			L4			Day1 adult			Day8 adult			Embryo			L1			L4			Day1 adult
Chr	Position	Editing_type	strand	location	neighboring_gene	Depth	Edited_reads	Editing_frequency	Depth	Edited_reads	Editing_frequency	Depth	Edited_reads	Editing_frequency	Depth	Edited_reads	Editing_frequency	Depth	Edited_reads	Editing_frequency	Depth	Edited_reads	Editing_frequency	Depth	Edited_reads	Editing_frequency	Depth	Edited_reads	Editing_frequency	Depth	Edited_reads	Editing_frequency	Depth	Edited_reads	Editing_frequency
I	1000736	A-G	+	antisense	null	0	0	-	0	0	-	0	0	-	0	0	-	0	0	-	0	0	-	1	1	1	2	1	0.5	0	0	-	0	0	-
I	1000743	A-G	+	antisense	null	0	0	-	0	0	-	0	0	-	0	0	-	0	0	-	0	0	-	1	1	1	2	2	1	0	0	-	0	0	-
I	1000750	A-G	+	antisense	null	0	0	-	0	0	-	0	0	-	0	0	-	0	0	-	0	0	-	1	1	1	2	1	0.5	0	0	-	0	0	-
I	1000755	A-G	+	antisense	null	0	0	-	0	0	-	0	0	-	0	0	-	0	0	-	0	0	-	1	1	1	2	2	1	0	0	-	0	0	-
I	1000758	A-G	+	antisense	null	0	0	-	0	0	-	0	0	-	0	0	-	0	0	-	0	0	-	1	1	1	2	2	1	0	0	-	0	0	-
I	10064026	A-G	-	upstream	Y106G6C.1	1	1	1	1	1	1	0	0	-	0	0	-	0	0	-	0	0	-	0	0	-	0	0	-	0	0	-	0	0	-
I	10064031	A-G	-	upstream	Y106G6C.1	1	1	1	1	1	1	0	0	-	0	0	-	0	0	-	0	0	-	0	0	-	0	0	-	0	0	-	0	0	-
I	10064511	A-G	-	integenic	-	0	0	-	2	2	1	0	0	-	0	0	-	0	0	-	0	0	-	0	0	-	0	0	-	0	0	-	0	0	-
I	10064535	A-G	-	integenic	-	0	0	-	2	2	1	0	0	-	0	0	-	0	0	-	0	0	-	0	0	-	0	0	-	0	0	-	0	0	-
I	10064541	A-G	-	integenic	-	0	0	-	2	2	1	0	0	-	0	0	-	0	0	-	0	0	-	0	0	-	0	0	-	0	0	-	0	0	-
I	10064543	A-G	-	integenic	-	0	0	-	2	2	1	0	0	-	0	0	-	0	0	-	0	0	-	0	0	-	0	0	-	0	0	-	0	0	-
I	10064544	A-G	-	integenic	-	0	0	-	2	2	1	0	0	-	0	0	-	0	0	-	0	0	-	0	0	-	0	0	-	0	0	-	0	0	-
I	10064556	A-G	-	integenic	-	0	0	-	2	2	1	0	0	-	0	0	-	0	0	-	0	0	-	0	0	-	0	0	-	0	0	-	0	0	-
I	10064557	A-G	-	integenic	-	0	0	-	2	2	1	0	0	-	0	0	-	0	0	-	0	0	-	0	0	-	0	0	-	0	0	-	0	0	-
I	1016083	A-G	+	upstream	C54G6.5	0	0	-	0	0	-	0	0	-	0	0	-	1	1	1	0	0	-	0	0	-	0	0	-	2	0	0	7	2	0.285714
I	10169028	A-G	-	downstream	C25A1.4	0	0	-	2	2	1	0	0	-	0	0	-	0	0	-	0	0	-	0	0	-	0	0	-	0	0	-	0	0	-
I	10171175	A-G	-	intron	C25A1.4	8	0	0	25	10	0.4	8	1	0.125	5	0	0	0	0	-	3	2	0.666667	2	0	0	26	12	0.461538	7	0	0	2	1	0.5
I	10176661	A-G	+	upstream	C25A1.5	0	0	-	2	2	1	0	0	-	0	0	-	0	0	-	0	0	-	0	0	-	1	0	0	0	0	-	0	0	-
I	10176662	A-G	+	upstream	C25A1.5	0	0	-	2	2	1	0	0	-	0	0	-	0	0	-	0	0	-	0	0	-	1	0	0	0	0	-	0	0	-
I	1017804	A-G	+	downstream	C54G6.5	0	0	-	0	0	-	0	0	-	0	0	-	1	0	0	0	0	-	0	0	-	0	0	-	0	0	-	5	2	0.4
I	1017851	A-G	+	downstream	C54G6.5	0	0	-	0	0	-	0	0	-	0	0	-	1	0	0	0	0	-	0	0	-	0	0	-	0	0	-	5	2	0.4
I	1017852	A-G	+	downstream	C54G6.5	0	0	-	0	0	-	0	0	-	0	0	-	1	0	0	0	0	-	0	0	-	0	0	-	0	0	-	5	2	0.4
I	10184003	A-G	+	downstream	C25A1.7	12	0	0	16	0	0	9	0	0	1	0	0	15	0	0	1	0	0	3	1	0.333333	7	1	0.142857	8	0	0	5	1	0.2
I	10184004	A-G	+	downstream	C25A1.7	12	2	0.166667	16	1	0.0625	9	0	0	1	0	0	15	2	0.133333	1	0	0	3	0	0	7	3	0.428571	8	1	0.125	5	1	0.2
I	10184036	A-G	+	downstream	C25A1.7	10	1	0.1	14	1	0.0714286	7	0	0	1	0	0	12	2	0.166667	0	0	-	3	0	0	6	0	0	8	1	0.125	5	1	0.2
I	10184096	A-G	+	downstream	C25A1.7	0	0	-	1	0	0	1	0	0	0	0	-	0	0	-	0	0	-	1	1	1	0	0	-	1	0	0	1	1	1
I	10184269	A-G	+	downstream	C25A1.7	11	0	0	11	3	0.272727	13	0	0	3	0	0	11	1	0.0909091	1	0	0	4	1	0.25	7	3	0.428571	6	1	0.166667	6	1	0.166667
I	1018860	A-C	+	CDS	Y34D9A.11	0	0	-	70	2	0.0285714	6	0	0	25	9	0.36	51	5	0.0980392	23	0	0	1	0	0	47	0	0	20	3	0.15	81	11	0.135802
I	1018869	A-C	+	CDS	Y34D9A.11	0	0	-	83	2	0.0240964	6	0	0	28	9	0.321429	75	5	0.0666667	31	0	0	2	0	0	61	0	0	29	3	0.103448	94	11	0.117021
I	1018873	T-C	+	CDS	Y34D9A.11	0	0	-	98	2	0.0204082	6	0	0	31	9	0.290323	86	5	0.0581395	40	0	0	2	0	0	72	0	0	34	3	0.0882353	108	11	0.101852
I	1020231	A-G	-	intron	Y34D9A.1;Y34D9A.8	1	1	1	0	0	-	0	0	-	0	0	-	0	0	-	1	1	1	0	0	-	0	0	-	0	0	-	0	0	-
I	1020232	A-G	-	intron	Y34D9A.1;Y34D9A.8	1	1	1	0	0	-	0	0	-	0	0	-	0	0	-	1	1	1	0	0	-	0	0	-	0	0	-	0	0	-
I	1020253	A-G	-	intron	Y34D9A.1;Y34D9A.8	2	1	0.5	0	0	-	0	0	-	0	0	-	0	0	-	1	1	1	0	0	-	0	0	-	0	0	-	0	0	-
I	1020254	A-G	-	intron	Y34D9A.1;Y34D9A.8	2	2	1	0	0	-	0	0	-	0	0	-	0	0	-	1	1	1	0	0	-	0	0	-	0	0	-	0	0	-
I	1020257	A-G	-	intron	Y34D9A.1;Y34D9A.8	2	2	1	0	0	-	0	0	-	0	0	-	0	0	-	1	1	1	0	0	-	0	0	-	0	0	-	0	0	-
I	1020305	A-G	-	intron	Y34D9A.1;Y34D9A.8	2	2	1	0	0	-	0	0	-	0	0	-	0	0	-	2	0	0	0	0	-	0	0	-	0	0	-	0	0	-
I	1020306	A-G	-	intron	Y34D9A.1;Y34D9A.8	2	1	0.5	0	0	-	0	0	-	0	0	-	0	0	-	2	1	0.5	0	0	-	0	0	-	0	0	-	0	0	-
I	1020313	A-G	-	intron	Y34D9A.1;Y34D9A.8	2	0	0	0	0	-	0	0	-	0	0	-	0	0	-	2	2	1	0	0	-	0	0	-	0	0	-	0	0	-
I	1020315	A-G	-	intron	Y34D9A.1;Y34D9A.8	2	1	0.5	0	0	-	0	0	-	0	0	-	0	0	-	2	1	0.5	0	0	-	0	0	-	0	0	-	0	0	-
I	1020316	A-G	-	intron	Y34D9A.1;Y34D9A.8	2	2	1	0	0	-	0	0	-	0	0	-	0	0	-	2	2	1	0	0	-	0	0	-	0	0	-	0	0	-
I	1020322	A-G	-	intron	Y34D9A.1;Y34D9A.8	2	2	1	0	0	-	0	0	-	0	0	-	0	0	-	2	2	1	0	0	-	0	0	-	0	0	-	0	0	-
I	1020329	A-G	-	intron	Y34D9A.1;Y34D9A.8	2	2	1	0	0	-	0	0	-	0	0	-	0	0	-	2	1	0.5	0	0	-	0	0	-	0	0	-	0	0	-
I	1020343	A-G	-	intron	Y34D9A.1;Y34D9A.8	1	1	1	0	0	-	0	0	-	0	0	-	0	0	-	2	2	1	0	0	-	0	0	-	0	0	-	0	0	-
I	1020346	A-G	-	intron	Y34D9A.1;Y34D9A.8	1	1	1	0	0	-	0	0	-	0	0	-	0	0	-	2	2	1	0	0	-	0	0	-	0	0	-	0	0	-
I	1020369	A-G	-	intron	Y34D9A.1;Y34D9A.8	1	1	1	0	0	-	0	0	-	0	0	-	0	0	-	1	1	1	0	0	-	0	0	-	0	0	-	0	0	-
I	1020374	A-G	-	intron	Y34D9A.1;Y34D9A.8	1	1	1	0	0	-	0	0	-	0	0	-	0	0	-	1	1	1	0	0	-	0	0	-	0	0	-	0	0	-
I	1020375	A-G	-	intron	Y34D9A.1;Y34D9A.8	1	1	1	0	0	-	0	0	-	0	0	-	0	0	-	1	1	1	0	0	-	0	0	-	0	0	-	0	0	-
I	1020407	A-G	-	intron	Y34D9A.1;Y34D9A.8	1	1	1	0	0	-	0	0	-	0	0	-	0	0	-	1	1	1	0	0	-	0	0	-	0	0	-	0	0	-
I	1020416	A-G	-	intron	Y34D9A.1;Y34D9A.8	1	1	1	0	0	-	0	0	-	0	0	-	0	0	-	1	1	1	0	0	-	0	0	-	0	0	-	0	0	-
I	1020417	A-G	-	intron	Y34D9A.1;Y34D9A.8	1	1	1	0	0	-	0	0	-	0	0	-	0	0	-	1	1	1	0	0	-	0	0	-	0	0	-	0	0	-
I	1020418	A-G	-	intron	Y34D9A.1;Y34D9A.8	1	1	1	0	0	-	0	0	-	0	0	-	0	0	-	1	1	1	0	0	-	0	0	-	0	0	-	0	0	-
I	1020730	A-G	-	intron	Y34D9A.1;Y34D9A.8	2	0	0	1	1	1	2	2	1	0	0	-	0	0	-	3	2	0.666667	0	0	-	2	0	0	1	0	0	0	0	-
I	1020742	A-G	-	intron	Y34D9A.1;Y34D9A.8	2	2	1	1	1	1	2	2	1	0	0	-	0	0	-	3	1	0.333333	0	0	-	2	1	0.5	1	1	1	0	0	-
I	1020762	A-G	-	intron	Y34D9A.1;Y34D9A.8	2	0	0	1	0	0	2	1	0.5	0	0	-	0	0	-	3	1	0.333333	0	0	-	2	0	0	1	0	0	0	0	-
I	1020763	A-G	-	intron	Y34D9A.1;Y34D9A.8	2	1	0.5	1	0	0	2	1	0.5	0	0	-	0	0	-	3	1	0.333333	0	0	-	2	0	0	1	0	0	0	0	-
I	1020764	A-G	-	intron	Y34D9A.1;Y34D9A.8	2	1	0.5	1	1	1	2	1	0.5	0	0	-	0	0	-	3	2	0.666667	0	0	-	2	1	0.5	1	0	0	0	0	-
I	1020777	A-G	-	intron	Y34D9A.1;Y34D9A.8	2	1	0.5	1	0	0	2	0	0	0	0	-	0	0	-	3	2	0.666667	0	0	-	2	0	0	2	0	0	0	0	-
I	1020784	A-G	-	intron	Y34D9A.1;Y34D9A.8	2	0	0	1	0	0	2	0	0	0	0	-	0	0	-	3	2	0.666667	0	0	-	2	0	0	2	0	0	0	0	-
I	1020789	A-G	-	intron	Y34D9A.1;Y34D9A.8	2	1	0.5	1	0	0	2	1	0.5	0	0	-	0	0	-	3	2	0.666667	0	0	-	2	0	0	2	0	0	0	0	-
I	1020806	A-G	-	intron	Y34D9A.1;Y34D9A.8	2	0	0	1	1	1	2	2	1	0	0	-	0	0	-	3	2	0.666667	0	0	-	3	2	0.666667	2	0	0	0	0	-
I	1021486	A-G	-	intron	Y34D9A.1;Y34D9A.8	2	0	0	2	1	0.5	1	0	0	0	0	-	0	0	-	1	1	1	0	0	-	2	0	0	1	0	0	1	0	0
I	1021497	A-G	-	intron	Y34D9A.1;Y34D9A.8	2	0	0	2	1	0.5	3	0	0	0	0	-	0	0	-	2	2	1	0	0	-	3	1	0.333333	1	0	0	1	1	1
I	1021502	A-G	-	intron	Y34D9A.1;Y34D9A.8	2	1	0.5	2	2	1	3	2	0.666667	0	0	-	0	0	-	2	2	1	0	0	-	3	1	0.333333	1	0	0	1	1	1
I	1021503	A-G	-	intron	Y34D9A.1;Y34D9A.8	2	0	0	2	2	1	3	1	0.333333	0	0	-	0	0	-	2	1	0.5	0	0	-	3	1	0.333333	1	0	0	1	1	1
I	1021738	A-G	-	intron	Y34D9A.1;Y34D9A.8	0	0	-	1	0	0	0	0	-	0	0	-	1	0	0	3	2	0.666667	2	0	0	1	0	0	0	0	-	0	0	-
I	1021741	A-G	-	intron	Y34D9A.1;Y34D9A.8	0	0	-	1	0	0	0	0	-	0	0	-	1	0	0	4	1	0.25	2	2	1	1	0	0	0	0	-	0	0	-
I	1021758	A-G	-	intron	Y34D9A.1;Y34D9A.8	0	0	-	1	1	1	0	0	-	0	0	-	1	0	0	4	4	1	2	2	1	1	0	0	0	0	-	0	0	-
I	1021763	A-G	-	intron	Y34D9A.1;Y34D9A.8	0	0	-	0	0	-	0	0	-	0	0	-	1	0	0	4	2	0.5	1	0	0	1	0	0	0	0	-	0	0	-
I	1021764	A-G	-	intron	Y34D9A.1;Y34D9A.8	0	0	-	0	0	-	0	0	-	0	0	-	1	0	0	4	4	1	1	0	0	1	0	0	0	0	-	0	0	-
I	1021765	A-G	-	intron	Y34D9A.1;Y34D9A.8	0	0	-	0	0	-	0	0	-	0	0	-	1	0	0	4	3	0.75	1	1	1	1	1	1	0	0	-	0	0	-
I	1021766	A-G	-	intron	Y34D9A.1;Y34D9A.8	0	0	-	0	0	-	0	0	-	0	0	-	1	0	0	3	2	0.666667	1	1	1	1	0	0	0	0	-	0	0	-
I	1021767	A-G	-	intron	Y34D9A.1;Y34D9A.8	0	0	-	0	0	-	0	0	-	0	0	-	1	0	0	3	2	0.666667	1	0	0	1	1	1	0	0	-	0	0	-
I	1022394	A-G	-	intron	Y34D9A.1;Y34D9A.8	0	0	-	0	0	-	0	0	-	0	0	-	0	0	-	0	0	-	1	0	0	2	2	1	0	0	-	0	0	-
I	1022773	A-G	-	intron	Y34D9A.1;Y34D9A.8	0	0	-	2	2	1	0	0	-	0	0	-	0	0	-	0	0	-	0	0	-	0	0	-	1	1	1	0	0	-
I	1022806	A-G	-	intron	Y34D9A.1;Y34D9A.8	0	0	-	2	2	1	0	0	-	0	0	-	0	0	-	0	0	-	0	0	-	0	0	-	1	1	1	0	0	-
I	1022807	A-G	-	intron	Y34D9A.1;Y34D9A.8	0	0	-	2	2	1	0	0	-	0	0	-	0	0	-	0	0	-	0	0	-	0	0	-	1	1	1	0	0	-
I	10234186	A-G	-	downstream	Y106G6E.7	0	0	-	5	1	0.2	2	0	0	0	0	-	0	0	-	1	0	0	1	0	0	8	3	0.375	0	0	-	0	0	-
I	10234208	A-G	-	downstream	Y106G6E.7	0	0	-	4	2	0.5	2	0	0	0	0	-	0	0	-	1	0	0	1	0	0	7	5	0.714286	0	0	-	0	0	-
I	10234209	A-G	-	downstream	Y106G6E.7	0	0	-	4	2	0.5	2	0	0	0	0	-	0	0	-	1	0	0	1	0	0	7	2	0.285714	0	0	-	0	0	-
I	1024320	A-G	-	intron	Y34D9A.1;Y34D9A.8	1	0	0	5	2	0.4	2	2	1	0	0	-	1	1	1	0	0	-	1	1	1	1	0	0	2	2	1	0	0	-
I	1024341	A-G	-	intron	Y34D9A.1;Y34D9A.8	1	0	0	4	2	0.5	2	1	0.5	0	0	-	1	0	0	0	0	-	2	0	0	2	0	0	2	0	0	0	0	-
I	1024342	A-G	-	intron	Y34D9A.1;Y34D9A.8	1	0	0	4	3	0.75	2	1	0.5	0	0	-	1	1	1	0	0	-	2	0	0	2	1	0.5	2	0	0	0	0	-
I	1024376	A-G	-	intron	Y34D9A.1;Y34D9A.8	1	0	0	3	0	0	1	0	0	0	0	-	1	1	1	1	0	0	2	0	0	1	0	0	2	2	1	0	0	-
I	1024377	A-G	-	intron	Y34D9A.1;Y34D9A.8	1	0	0	3	1	0.333333	1	0	0	0	0	-	1	1	1	1	0	0	2	1	0.5	1	0	0	2	0	0	0	0	-
I	1025045	A-G	-	intron	Y34D9A.1;Y34D9A.8	2	1	0.5	2	1	0.5	0	0	-	0	0	-	0	0	-	0	0	-	0	0	-	0	0	-	0	0	-	0	0	-
I	1025127	A-G	-	intron	Y34D9A.1;Y34D9A.8	3	1	0.333333	2	1	0.5	0	0	-	0	0	-	0	0	-	0	0	-	0	0	-	0	0	-	1	1	1	0	0	-
I	1025129	A-G	-	intron	Y34D9A.1;Y34D9A.8	3	2	0.666667	2	1	0.5	0	0	-	0	0	-	0	0	-	0	0	-	0	0	-	0	0	-	1	0	0	0	0	-
I	1025137	A-G	-	intron	Y34D9A.1;Y34D9A.8	3	2	0.666667	2	1	0.5	0	0	-	0	0	-	0	0	-	0	0	-	0	0	-	0	0	-	1	1	1	0	0	-
I	1025400	A-G	-	intron	Y34D9A.1;Y34D9A.8	2	2	1	0	0	-	0	0	-	0	0	-	0	0	-	0	0	-	0	0	-	0	0	-	0	0	-	0	0	-
I	1025430	A-G	-	intron	Y34D9A.1;Y34D9A.8	3	2	0.666667	0	0	-	0	0	-	0	0	-	0	0	-	0	0	-	0	0	-	0	0	-	0	0	-	0	0	-
I	1025442	A-G	-	intron	Y34D9A.1;Y34D9A.8	3	2	0.666667	1	1	1	0	0	-	0	0	-	0	0	-	0	0	-	0	0	-	0	0	-	0	0	-	0	0	-
I	1025443	A-G	-	intron	Y34D9A.1;Y34D9A.8	3	2	0.666667	1	0	0	0	0	-	0	0	-	0	0	-	0	0	-	0	0	-	0	0	-	0	0	-	0	0	-
I	1025447	A-G	-	intron	Y34D9A.1;Y34D9A.8	3	2	0.666667	1	0	0	0	0	-	0	0	-	0	0	-	0	0	-	0	0	-	0	0	-	0	0	-	0	0	-
I	1025452	A-G	-	intron	Y34D9A.1;Y34D9A.8	3	2	0.666667	1	1	1	0	0	-	0	0	-	0	0	-	0	0	-	0	0	-	0	0	-	0	0	-	0	0	-
I	1025457	A-G	-	intron	Y34D9A.1;Y34D9A.8	2	1	0.5	1	1	1	0	0	-	0	0	-	0	0	-	0	0	-	0	0	-	0	0	-	0	0	-	0	0	-
I	1025471	A-G	-	intron	Y34D9A.1;Y34D9A.8	2	1	0.5	2	1	0.5	0	0	-	0	0	-	0	0	-	0	0	-	0	0	-	0	0	-	1	1	1	0	0	-
I	1025472	A-G	-	intron	Y34D9A.1;Y34D9A.8	2	2	1	2	1	0.5	0	0	-	0	0	-	0	0	-	0	0	-	0	0	-	0	0	-	1	1	1	0	0	-
I	1025473	A-G	-	intron	Y34D9A.1;Y34D9A.8	2	1	0.5	2	1	0.5	0	0	-	0	0	-	0	0	-	0	0	-	0	0	-	0	0	-	1	1	1	0	0	-
I	1025496	A-G	-	intron	Y34D9A.1;Y34D9A.8	2	0	0	2	1	0.5	1	0	0	0	0	-	0	0	-	1	1	1	0	0	-	0	0	-	1	0	0	0	0	-
I	1025498	A-G	-	intron	Y34D9A.1;Y34D9A.8	1	0	0	2	0	0	1	1	1	0	0	-	0	0	-	1	1	1	0	0	-	0	0	-	1	0	0	0	0	-
I	1025503	A-G	-	intron	Y34D9A.1;Y34D9A.8	1	1	1	2	1	0.5	1	1	1	0	0	-	0	0	-	1	1	1	0	0	-	0	0	-	1	1	1	0	0	-
I	1025504	A-G	-	intron	Y34D9A.1;Y34D9A.8	1	1	1	2	2	1	1	1	1	0	0	-	0	0	-	1	1	1	0	0	-	0	0	-	1	1	1	0	0	-
I	1025507	A-G	-	intron	Y34D9A.1;Y34D9A.8	1	1	1	2	1	0.5	1	1	1	0	0	-	0	0	-	1	1	1	0	0	-	0	0	-	1	1	1	0	0	-
I	1025516	A-G	-	intron	Y34D9A.1;Y34D9A.8	1	0	0	2	1	0.5	1	1	1	0	0	-	0	0	-	1	0	0	0	0	-	0	0	-	1	0	0	0	0	-
I	1025520	A-G	-	intron	Y34D9A.1;Y34D9A.8	1	0	0	2	1	0.5	1	1	1	0	0	-	0	0	-	1	1	1	0	0	-	0	0	-	1	1	1	0	0	-
I	1025526	A-G	-	intron	Y34D9A.1;Y34D9A.8	1	1	1	2	2	1	1	1	1	0	0	-	0	0	-	1	1	1	0	0	-	0	0	-	1	1	1	0	0	-
I	1025530	A-G	-	intron	Y34D9A.1;Y34D9A.8	1	1	1	2	2	1	1	1	1	0	0	-	0	0	-	1	1	1	0	0	-	0	0	-	1	0	0	0	0	-
I	1025531	A-G	-	intron	Y34D9A.1;Y34D9A.8	1	1	1	2	1	0.5	1	1	1	0	0	-	0	0	-	1	0	0	0	0	-	0	0	-	1	0	0	0	0	-
I	1025540	A-G	-	intron	Y34D9A.1;Y34D9A.8	1	1	1	2	1	0.5	1	1	1	0	0	-	0	0	-	1	1	1	0	0	-	0	0	-	1	1	1	0	0	-
I	1025619	A-G	-	intron	Y34D9A.1;Y34D9A.8	1	1	1	2	2	1	1	1	1	0	0	-	0	0	-	1	1	1	0	0	-	0	0	-	1	1	1	0	0	-
I	1025627	A-G	-	intron	Y34D9A.1;Y34D9A.8	1	1	1	2	2	1	1	1	1	0	0	-	0	0	-	1	0	0	0	0	-	0	0	-	1	0	0	0	0	-
I	1025636	A-G	-	intron	Y34D9A.1;Y34D9A.8	1	0	0	2	2	1	1	1	1	0	0	-	0	0	-	1	1	1	0	0	-	0	0	-	1	1	1	0	0	-
I	1025642	A-G	-	intron	Y34D9A.1;Y34D9A.8	1	1	1	2	1	0.5	1	1	1	0	0	-	0	0	-	1	1	1	0	0	-	0	0	-	1	1	1	0	0	-
I	1025643	A-G	-	intron	Y34D9A.1;Y34D9A.8	1	1	1	2	1	0.5	1	1	1	0	0	-	0	0	-	1	0	0	0	0	-	0	0	-	1	1	1	0	0	-
I	1025647	A-G	-	intron	Y34D9A.1;Y34D9A.8	1	0	0	2	1	0.5	1	1	1	0	0	-	0	0	-	1	1	1	0	0	-	0	0	-	1	1	1	0	0	-
I	1025683	A-G	-	intron	Y34D9A.1;Y34D9A.8	1	1	1	1	1	1	1	1	1	0	0	-	0	0	-	1	0	0	0	0	-	0	0	-	0	0	-	0	0	-
I	1025687	A-G	-	intron	Y34D9A.1;Y34D9A.8	1	1	1	1	0	0	1	1	1	0	0	-	0	0	-	1	1	1	0	0	-	0	0	-	0	0	-	0	0	-
I	1025696	A-G	-	intron	Y34D9A.1;Y34D9A.8	1	1	1	1	1	1	0	0	-	0	0	-	0	0	-	1	1	1	0	0	-	0	0	-	0	0	-	0	0	-
I	1025718	A-G	-	intron	Y34D9A.1;Y34D9A.8	1	1	1	1	1	1	0	0	-	0	0	-	0	0	-	0	0	-	0	0	-	0	0	-	0	0	-	0	0	-
I	1025816	A-G	-	intron	Y34D9A.1;Y34D9A.8	0	0	-	4	4	1	1	1	1	0	0	-	0	0	-	1	0	0	0	0	-	1	1	1	1	1	1	0	0	-
I	1025829	A-G	-	intron	Y34D9A.1;Y34D9A.8	0	0	-	4	2	0.5	1	1	1	0	0	-	0	0	-	1	0	0	0	0	-	1	1	1	1	0	0	0	0	-
I	1025833	A-G	-	intron	Y34D9A.1;Y34D9A.8	0	0	-	4	4	1	1	1	1	0	0	-	0	0	-	1	0	0	0	0	-	1	1	1	1	1	1	0	0	-
I	1025842	A-G	-	intron	Y34D9A.1;Y34D9A.8	0	0	-	4	3	0.75	1	1	1	0	0	-	0	0	-	1	0	0	0	0	-	1	1	1	1	1	1	0	0	-
I	1025864	A-G	-	intron	Y34D9A.1;Y34D9A.8	0	0	-	4	1	0.25	1	1	1	0	0	-	0	0	-	1	0	0	0	0	-	1	0	0	1	0	0	0	0	-
I	1025875	A-G	-	intron	Y34D9A.1;Y34D9A.8	0	0	-	4	2	0.5	1	0	0	0	0	-	0	0	-	1	0	0	0	0	-	1	1	1	1	0	0	0	0	-
I	1025880	A-G	-	intron	Y34D9A.1;Y34D9A.8	0	0	-	4	2	0.5	1	0	0	0	0	-	0	0	-	1	0	0	0	0	-	1	0	0	1	0	0	0	0	-
I	1025882	A-G	-	intron	Y34D9A.1;Y34D9A.8	0	0	-	4	2	0.5	1	1	1	0	0	-	0	0	-	1	0	0	0	0	-	1	0	0	1	0	0	0	0	-
I	1025885	A-G	-	intron	Y34D9A.1;Y34D9A.8	0	0	-	4	3	0.75	1	1	1	0	0	-	0	0	-	1	0	0	0	0	-	1	1	1	1	1	1	0	0	-
I	1025893	A-G	-	intron	Y34D9A.1;Y34D9A.8	0	0	-	4	4	1	0	0	-	0	0	-	0	0	-	1	0	0	0	0	-	1	1	1	1	0	0	0	0	-
I	1025931	A-G	-	intron	Y34D9A.1;Y34D9A.8	3	0	0	4	4	1	1	1	1	0	0	-	0	0	-	1	0	0	0	0	-	1	1	1	1	1	1	0	0	-
I	1025942	A-G	-	intron	Y34D9A.1;Y34D9A.8	4	2	0.5	4	2	0.5	1	1	1	0	0	-	0	0	-	1	0	0	0	0	-	1	1	1	1	0	0	0	0	-
I	1025949	A-G	-	intron	Y34D9A.1;Y34D9A.8	4	1	0.25	4	3	0.75	1	0	0	0	0	-	0	0	-	1	0	0	0	0	-	1	0	0	1	0	0	0	0	-
I	1025957	A-G	-	intron	Y34D9A.1;Y34D9A.8	4	3	0.75	4	2	0.5	1	1	1	0	0	-	0	0	-	1	0	0	0	0	-	1	1	1	1	0	0	0	0	-
I	1025969	A-G	-	intron	Y34D9A.1;Y34D9A.8	4	2	0.5	4	1	0.25	1	1	1	0	0	-	0	0	-	1	0	0	0	0	-	1	1	1	1	1	1	0	0	-
I	10268368	A-C	-	CDS	ZC247.1	7	0	0	15	0	0	100	4	0.04	90	6	0.0666667	25	2	0.08	52	4	0.0769231	11	1	0.0909091	11	2	0.181818	75	1	0.0133333	50	4	0.08
I	10268680	C-T	-	CDS	ZC247.1	3	0	0	61	8	0.131148	166	22	0.13253	158	21	0.132911	4	3	0.75	77	12	0.155844	17	3	0.176471	21	1	0.047619	99	9	0.0909091	67	17	0.253731
I	10270298	A-C	-	CDS	ZC247.1	0	0	-	18	18	1	19	19	1	19	19	1	3	3	1	9	9	1	1	1	1	3	3	1	3	3	1	6	6	1
I	1031165	A-G	-	intron	Y34D9A.4;Y34D9A.8	3	1	0.333333	1	0	0	0	0	-	0	0	-	0	0	-	4	2	0.5	2	1	0.5	4	3	0.75	0	0	-	0	0	-
I	1031168	A-G	-	intron	Y34D9A.4;Y34D9A.8	3	1	0.333333	1	0	0	0	0	-	0	0	-	0	0	-	4	2	0.5	2	0	0	4	3	0.75	0	0	-	0	0	-
I	1031169	A-G	-	intron	Y34D9A.4;Y34D9A.8	3	0	0	1	0	0	0	0	-	0	0	-	0	0	-	4	2	0.5	2	0	0	4	2	0.5	0	0	-	0	0	-
I	1031171	A-G	-	intron	Y34D9A.4;Y34D9A.8	3	1	0.333333	1	0	0	0	0	-	0	0	-	0	0	-	4	1	0.25	2	0	0	4	1	0.25	0	0	-	0	0	-
I	1031172	A-G	-	intron	Y34D9A.4;Y34D9A.8	3	0	0	1	0	0	0	0	-	0	0	-	0	0	-	4	0	0	2	2	1	4	0	0	0	0	-	0	0	-
I	1031182	A-G	-	intron	Y34D9A.4;Y34D9A.8	3	2	0.666667	1	0	0	0	0	-	0	0	-	0	0	-	4	2	0.5	1	0	0	4	3	0.75	0	0	-	0	0	-
I	1031194	A-G	-	intron	Y34D9A.4;Y34D9A.8	2	1	0.5	1	0	0	0	0	-	0	0	-	0	0	-	3	2	0.666667	2	1	0.5	4	3	0.75	0	0	-	0	0	-
I	1031196	A-G	+	antisense	Y34D9A.4;Y34D9A.8	0	0	-	1	1	1	0	0	-	1	1	1	1	1	1	0	0	-	0	0	-	0	0	-	0	0	-	0	0	-
I	1031199	A-G	+	antisense	Y34D9A.4;Y34D9A.8	0	0	-	1	1	1	0	0	-	1	1	1	1	0	0	0	0	-	0	0	-	0	0	-	0	0	-	0	0	-
I	1031202	A-G	-	intron	Y34D9A.4;Y34D9A.8	2	1	0.5	1	0	0	0	0	-	0	0	-	0	0	-	3	1	0.333333	2	0	0	4	0	0	0	0	-	0	0	-
I	1031205	A-G	+	antisense	Y34D9A.4;Y34D9A.8	0	0	-	1	1	1	0	0	-	1	1	1	1	1	1	0	0	-	0	0	-	0	0	-	0	0	-	0	0	-
I	1031206	A-G	+	antisense	Y34D9A.4;Y34D9A.8	0	0	-	1	1	1	0	0	-	1	1	1	1	1	1	0	0	-	0	0	-	0	0	-	0	0	-	0	0	-
I	1031207	A-G	+	antisense	Y34D9A.4;Y34D9A.8	0	0	-	1	0	0	0	0	-	1	1	1	1	1	1	0	0	-	0	0	-	0	0	-	0	0	-	0	0	-
I	1031208	A-G	+	antisense	Y34D9A.4;Y34D9A.8	0	0	-	1	1	1	0	0	-	1	1	1	1	1	1	0	0	-	0	0	-	0	0	-	0	0	-	0	0	-
I	1031209	A-G	-	intron	Y34D9A.4;Y34D9A.8	2	2	1	1	0	0	0	0	-	0	0	-	0	0	-	3	2	0.666667	2	2	1	4	3	0.75	0	0	-	0	0	-
I	1031210	A-G	-	intron	Y34D9A.4;Y34D9A.8	2	1	0.5	1	0	0	0	0	-	0	0	-	0	0	-	3	1	0.333333	1	0	0	4	2	0.5	0	0	-	0	0	-
I	1031211	A-G	-	intron	Y34D9A.4;Y34D9A.8	2	1	0.5	1	0	0	0	0	-	0	0	-	0	0	-	3	1	0.333333	2	0	0	4	3	0.75	0	0	-	0	0	-
I	1031220	A-G	-	intron	Y34D9A.4;Y34D9A.8	2	2	1	0	0	-	0	0	-	0	0	-	0	0	-	3	1	0.333333	2	1	0.5	4	2	0.5	0	0	-	0	0	-
I	1031223	A-G	-	intron	Y34D9A.4;Y34D9A.8	2	2	1	0	0	-	0	0	-	0	0	-	0	0	-	3	1	0.333333	2	0	0	4	0	0	0	0	-	0	0	-
I	1031246	A-G	-	intron	Y34D9A.4;Y34D9A.8	1	0	0	0	0	-	0	0	-	0	0	-	0	0	-	1	0	0	2	1	0.5	2	1	0.5	0	0	-	0	0	-
I	1031262	A-G	-	intron	Y34D9A.4;Y34D9A.8	1	1	1	0	0	-	0	0	-	0	0	-	0	0	-	1	1	1	0	0	-	2	1	0.5	0	0	-	0	0	-
I	1031264	A-G	-	intron	Y34D9A.4;Y34D9A.8	1	0	0	0	0	-	0	0	-	0	0	-	0	0	-	1	0	0	0	0	-	2	2	1	0	0	-	0	0	-
I	1031265	A-G	+	antisense	Y34D9A.4;Y34D9A.8	0	0	-	1	1	1	0	0	-	1	1	1	0	0	-	0	0	-	0	0	-	0	0	-	1	1	1	1	0	0
I	1031271	A-G	-	intron	Y34D9A.4;Y34D9A.8	1	1	1	0	0	-	0	0	-	0	0	-	0	0	-	1	1	1	1	1	1	2	1	0.5	0	0	-	0	0	-
I	1031292	A-G	-	intron	Y34D9A.4;Y34D9A.8	1	1	1	0	0	-	0	0	-	0	0	-	0	0	-	1	1	1	1	1	1	1	1	1	0	0	-	0	0	-
I	1031293	A-G	+	antisense	Y34D9A.4;Y34D9A.8	0	0	-	1	0	0	0	0	-	1	0	0	1	0	0	0	0	-	0	0	-	0	0	-	1	1	1	1	1	1
I	1031294	A-G	+	antisense	Y34D9A.4;Y34D9A.8	0	0	-	1	1	1	0	0	-	1	1	1	1	0	0	0	0	-	0	0	-	0	0	-	1	1	1	1	1	1
I	1031300	A-G	-	intron	Y34D9A.4;Y34D9A.8	1	1	1	0	0	-	0	0	-	0	0	-	0	0	-	1	1	1	1	0	0	1	1	1	0	0	-	0	0	-
I	1031301	A-G	-	intron	Y34D9A.4;Y34D9A.8	1	1	1	0	0	-	0	0	-	0	0	-	0	0	-	1	0	0	1	1	1	1	1	1	0	0	-	0	0	-
I	1031312	A-G	+	antisense	Y34D9A.4;Y34D9A.8	0	0	-	1	1	1	0	0	-	1	1	1	1	1	1	0	0	-	0	0	-	0	0	-	1	1	1	1	1	1
I	1031320	A-G	-	intron	Y34D9A.4;Y34D9A.8	1	1	1	0	0	-	0	0	-	0	0	-	0	0	-	1	1	1	1	1	1	1	0	0	0	0	-	0	0	-
I	1031322	A-G	+	antisense	Y34D9A.4;Y34D9A.8	0	0	-	1	1	1	0	0	-	1	1	1	1	0	0	0	0	-	0	0	-	0	0	-	1	0	0	1	0	0
I	1031323	A-G	+	antisense	Y34D9A.4;Y34D9A.8	0	0	-	1	1	1	0	0	-	1	1	1	1	1	1	0	0	-	0	0	-	0	0	-	1	0	0	1	0	0
I	1031324	A-G	+	antisense	Y34D9A.4;Y34D9A.8	0	0	-	1	1	1	0	0	-	1	1	1	1	0	0	0	0	-	0	0	-	0	0	-	1	1	1	1	0	0
I	1031330	A-G	-	intron	Y34D9A.4;Y34D9A.8	1	1	1	0	0	-	0	0	-	0	0	-	0	0	-	1	1	1	1	1	1	1	1	1	0	0	-	0	0	-
I	1031331	A-G	+	antisense	Y34D9A.4;Y34D9A.8	0	0	-	1	1	1	0	0	-	1	0	0	1	0	0	0	0	-	0	0	-	0	0	-	1	1	1	1	1	1
I	1031332	A-G	+	antisense	Y34D9A.4;Y34D9A.8	0	0	-	1	1	1	0	0	-	1	1	1	1	0	0	0	0	-	0	0	-	0	0	-	1	1	1	1	0	0
I	1031337	A-G	+	antisense	Y34D9A.4;Y34D9A.8	0	0	-	1	1	1	0	0	-	1	1	1	1	1	1	0	0	-	0	0	-	0	0	-	1	1	1	1	1	1
I	1031366	A-G	+	antisense	Y34D9A.4;Y34D9A.8	0	0	-	0	0	-	0	0	-	1	1	1	1	1	1	0	0	-	0	0	-	0	0	-	1	1	1	1	1	1
I	1031371	A-G	+	antisense	Y34D9A.4;Y34D9A.8	0	0	-	0	0	-	0	0	-	1	1	1	1	1	1	0	0	-	0	0	-	0	0	-	1	0	0	1	1	1
I	1031374	A-G	+	antisense	Y34D9A.4;Y34D9A.8	0	0	-	0	0	-	0	0	-	1	1	1	1	1	1	0	0	-	0	0	-	0	0	-	1	1	1	1	0	0
I	1031375	A-G	+	antisense	Y34D9A.4;Y34D9A.8	0	0	-	0	0	-	0	0	-	1	1	1	1	1	1	0	0	-	0	0	-	0	0	-	1	1	1	1	1	1
I	1031391	A-G	+	antisense	Y34D9A.4;Y34D9A.8	0	0	-	0	0	-	0	0	-	0	0	-	0	0	-	0	0	-	0	0	-	0	0	-	1	1	1	1	1	1
I	1031404	A-G	+	antisense	Y34D9A.4;Y34D9A.8	0	0	-	0	0	-	0	0	-	0	0	-	0	0	-	0	0	-	0	0	-	0	0	-	1	1	1	1	1	1
I	1031864	A-G	-	intron	Y34D9A.4;Y34D9A.8	0	0	-	1	0	0	0	0	-	0	0	-	2	1	0.5	0	0	-	1	0	0	3	1	0.333333	0	0	-	1	1	1
I	1031865	A-G	-	intron	Y34D9A.4;Y34D9A.8	0	0	-	1	1	1	0	0	-	0	0	-	2	1	0.5	0	0	-	1	0	0	3	2	0.666667	0	0	-	1	0	0
I	1031868	A-G	-	intron	Y34D9A.4;Y34D9A.8	0	0	-	1	1	1	0	0	-	0	0	-	2	1	0.5	0	0	-	1	0	0	3	3	1	0	0	-	1	0	0
I	1031891	A-G	-	intron	Y34D9A.4;Y34D9A.8	0	0	-	1	1	1	0	0	-	0	0	-	0	0	-	0	0	-	1	0	0	3	3	1	0	0	-	1	1	1
I	1031898	A-G	-	intron	Y34D9A.4;Y34D9A.8	0	0	-	1	0	0	0	0	-	0	0	-	0	0	-	0	0	-	1	0	0	3	3	1	0	0	-	1	0	0
I	1040031	A-G	-	intron	Y34D9A.8	0	0	-	0	0	-	0	0	-	0	0	-	0	0	-	0	0	-	0	0	-	1	1	1	1	1	1	0	0	-
I	1040037	A-G	-	intron	Y34D9A.8	0	0	-	0	0	-	0	0	-	0	0	-	0	0	-	0	0	-	0	0	-	1	1	1	1	1	1	0	0	-
I	10468996	A-G	-	intron	Y106G6H.12	0	0	-	2	1	0.5	0	0	-	0	0	-	0	0	-	0	0	-	3	1	0.333333	2	1	0.5	0	0	-	0	0	-
I	10469011	A-G	-	intron	Y106G6H.12	0	0	-	3	2	0.666667	0	0	-	0	0	-	0	0	-	1	0	0	3	3	1	2	1	0.5	0	0	-	0	0	-
I	10469026	A-G	-	intron	Y106G6H.12	0	0	-	3	2	0.666667	0	0	-	0	0	-	0	0	-	1	0	0	3	3	1	2	0	0	0	0	-	0	0	-
I	104821	A-G	-	intron	Y48G1C.8	2	1	0.5	1	1	1	0	0	-	1	0	0	0	0	-	1	0	0	0	0	-	0	0	-	0	0	-	0	0	-
I	104822	A-G	-	intron	Y48G1C.8	2	0	0	1	1	1	0	0	-	1	0	0	0	0	-	1	1	1	0	0	-	0	0	-	0	0	-	0	0	-
I	104828	A-G	-	intron	Y48G1C.8	2	1	0.5	0	0	-	0	0	-	1	1	1	0	0	-	1	1	1	0	0	-	0	0	-	0	0	-	0	0	-
I	104853	A-G	-	intron	Y48G1C.8	2	1	0.5	1	1	1	0	0	-	1	0	0	0	0	-	0	0	-	0	0	-	0	0	-	0	0	-	0	0	-
I	104854	A-G	-	intron	Y48G1C.8	2	0	0	1	1	1	0	0	-	1	1	1	0	0	-	0	0	-	0	0	-	0	0	-	0	0	-	0	0	-
I	104867	A-G	-	intron	Y48G1C.8	2	2	1	1	1	1	0	0	-	1	1	1	0	0	-	0	0	-	0	0	-	0	0	-	0	0	-	0	0	-
I	104872	A-G	-	intron	Y48G1C.8	2	0	0	1	1	1	0	0	-	1	1	1	0	0	-	0	0	-	0	0	-	0	0	-	0	0	-	0	0	-
I	1050777	A-G	-	3UTR/intron	Y34D9A.8	15	0	0	9	1	0.111111	4	0	0	4	0	0	1	0	0	3	0	0	16	0	0	47	7	0.148936	5	0	0	13	0	0
I	1051634	A-G	-	intron	Y34D9A.8	0	0	-	3	0	0	0	0	-	0	0	-	0	0	-	0	0	-	0	0	-	5	3	0.6	0	0	-	0	0	-
I	1051635	A-G	+	downstream	Y34D9A.6	0	0	-	0	0	-	0	0	-	0	0	-	0	0	-	0	0	-	0	0	-	3	2	0.666667	0	0	-	0	0	-
I	1053015	A-G	-	intron	Y34D9A.8	1	0	0	22	2	0.0909091	3	0	0	2	0	0	0	0	-	8	0	0	4	0	0	19	0	0	4	0	0	0	0	-
I	1053016	A-G	-	intron	Y34D9A.8	1	0	0	22	2	0.0909091	3	0	0	2	0	0	0	0	-	8	0	0	4	0	0	19	0	0	4	0	0	0	0	-
I	1053025	A-G	-	intron	Y34D9A.8	1	0	0	22	2	0.0909091	3	0	0	2	0	0	0	0	-	8	0	0	4	0	0	19	0	0	4	0	0	0	0	-
I	1053071	A-G	-	intron	Y34D9A.8	3	0	0	20	2	0.1	4	0	0	1	0	0	0	0	-	8	0	0	3	0	0	17	0	0	5	0	0	0	0	-
I	1053974	A-G	-	3UTR/intron	Y34D9A.10	78	0	0	63	2	0.031746	37	1	0.027027	53	0	0	53	0	0	108	2	0.0185185	132	7	0.0530303	129	15	0.116279	82	1	0.0121951	86	1	0.0116279
I	10550559	A-G	+	downstream	F25H2.3	0	0	-	1	1	1	0	0	-	1	1	1	0	0	-	0	0	-	0	0	-	0	0	-	0	0	-	0	0	-
I	10550580	A-G	+	downstream	F25H2.3	0	0	-	1	1	1	0	0	-	1	1	1	0	0	-	0	0	-	0	0	-	0	0	-	0	0	-	0	0	-
I	10550585	A-G	+	downstream	F25H2.3	0	0	-	1	1	1	0	0	-	1	1	1	0	0	-	0	0	-	0	0	-	0	0	-	0	0	-	0	0	-
I	10550586	A-G	+	downstream	F25H2.3	0	0	-	1	1	1	0	0	-	1	1	1	0	0	-	0	0	-	0	0	-	0	0	-	0	0	-	0	0	-
I	10550615	A-G	+	downstream	F25H2.3	0	0	-	1	1	1	0	0	-	1	1	1	0	0	-	0	0	-	0	0	-	0	0	-	0	0	-	0	0	-
I	10550659	A-G	+	downstream	F25H2.3	0	0	-	2	1	0.5	0	0	-	1	1	1	0	0	-	0	0	-	0	0	-	0	0	-	0	0	-	0	0	-
I	1056550	A-G	-	intron	Y34D9A.10	0	0	-	2	2	1	0	0	-	0	0	-	0	0	-	0	0	-	0	0	-	3	0	0	0	0	-	0	0	-
I	1056560	A-G	-	intron	Y34D9A.10	0	0	-	2	1	0.5	0	0	-	0	0	-	0	0	-	0	0	-	0	0	-	3	3	1	0	0	-	0	0	-
I	1056583	A-G	-	intron	Y34D9A.10	0	0	-	1	0	0	0	0	-	0	0	-	0	0	-	0	0	-	0	0	-	3	2	0.666667	0	0	-	0	0	-
I	1056614	A-G	-	intron	Y34D9A.10	0	0	-	2	2	1	0	0	-	0	0	-	0	0	-	0	0	-	0	0	-	1	0	0	0	0	-	0	0	-
I	1056619	A-G	-	intron	Y34D9A.10	0	0	-	2	2	1	0	0	-	0	0	-	0	0	-	0	0	-	0	0	-	1	1	1	0	0	-	0	0	-
I	1056625	A-G	-	intron	Y34D9A.10	0	0	-	2	2	1	0	0	-	0	0	-	0	0	-	0	0	-	0	0	-	2	0	0	0	0	-	0	0	-
I	1056626	A-G	-	intron	Y34D9A.10	0	0	-	2	2	1	0	0	-	0	0	-	0	0	-	0	0	-	0	0	-	2	1	0.5	0	0	-	0	0	-
I	1056632	A-G	-	intron	Y34D9A.10	0	0	-	2	0	0	0	0	-	0	0	-	0	0	-	0	0	-	0	0	-	2	2	1	0	0	-	0	0	-
I	1056637	A-G	-	intron	Y34D9A.10	0	0	-	2	1	0.5	0	0	-	0	0	-	0	0	-	0	0	-	0	0	-	2	2	1	0	0	-	0	0	-
I	1056638	A-G	-	intron	Y34D9A.10	0	0	-	2	1	0.5	0	0	-	0	0	-	0	0	-	0	0	-	0	0	-	2	2	1	0	0	-	0	0	-
I	1056652	A-G	-	intron	Y34D9A.10	0	0	-	2	2	1	0	0	-	0	0	-	0	0	-	0	0	-	0	0	-	2	0	0	0	0	-	0	0	-
I	1056653	A-G	-	intron	Y34D9A.10	0	0	-	2	2	1	0	0	-	0	0	-	0	0	-	0	0	-	0	0	-	2	0	0	0	0	-	0	0	-
I	1056739	A-G	-	intron	Y34D9A.10	5	5	1	0	0	-	0	0	-	0	0	-	0	0	-	0	0	-	0	0	-	3	2	0.666667	0	0	-	0	0	-
I	1056772	A-G	-	intron	Y34D9A.10	6	6	1	0	0	-	0	0	-	0	0	-	0	0	-	0	0	-	0	0	-	2	1	0.5	0	0	-	0	0	-
I	1056773	A-G	-	intron	Y34D9A.10	6	6	1	0	0	-	0	0	-	0	0	-	0	0	-	0	0	-	0	0	-	2	0	0	0	0	-	0	0	-
I	1056790	A-G	-	intron	Y34D9A.10	6	4	0.666667	0	0	-	0	0	-	0	0	-	0	0	-	0	0	-	0	0	-	2	2	1	0	0	-	0	0	-
I	1056797	A-G	-	intron	Y34D9A.10	5	3	0.6	0	0	-	0	0	-	0	0	-	0	0	-	0	0	-	0	0	-	2	1	0.5	0	0	-	0	0	-
I	1056799	A-G	-	intron	Y34D9A.10	5	2	0.4	0	0	-	0	0	-	0	0	-	0	0	-	0	0	-	0	0	-	2	0	0	0	0	-	0	0	-
I	1056801	A-G	-	intron	Y34D9A.10	5	5	1	0	0	-	0	0	-	0	0	-	0	0	-	0	0	-	0	0	-	2	2	1	0	0	-	0	0	-
I	1056802	A-G	-	intron	Y34D9A.10	5	2	0.4	0	0	-	0	0	-	0	0	-	0	0	-	0	0	-	0	0	-	2	1	0.5	0	0	-	0	0	-
I	1056813	A-G	-	intron	Y34D9A.10	5	2	0.4	0	0	-	0	0	-	0	0	-	0	0	-	0	0	-	0	0	-	1	1	1	0	0	-	0	0	-
I	1056840	A-G	-	intron	Y34D9A.10	4	2	0.5	0	0	-	0	0	-	0	0	-	0	0	-	0	0	-	0	0	-	0	0	-	0	0	-	0	0	-
I	1056841	A-G	-	intron	Y34D9A.10	4	2	0.5	0	0	-	0	0	-	0	0	-	0	0	-	0	0	-	0	0	-	0	0	-	0	0	-	0	0	-
I	1058148	A-G	-	intron	Y34D9A.10	0	0	-	2	2	1	1	0	0	0	0	-	0	0	-	0	0	-	1	0	0	1	0	0	0	0	-	1	1	1
I	1058162	A-G	-	intron	Y34D9A.10	0	0	-	2	0	0	1	0	0	0	0	-	0	0	-	0	0	-	1	0	0	2	1	0.5	0	0	-	1	1	1
I	1058163	A-G	-	intron	Y34D9A.10	0	0	-	2	0	0	1	1	1	0	0	-	0	0	-	0	0	-	1	0	0	2	2	1	0	0	-	1	0	0
I	1058164	A-G	-	intron	Y34D9A.10	0	0	-	2	1	0.5	1	1	1	0	0	-	0	0	-	0	0	-	1	1	1	2	2	1	0	0	-	1	1	1
I	1058165	A-G	-	intron	Y34D9A.10	0	0	-	2	1	0.5	1	1	1	0	0	-	0	0	-	0	0	-	1	0	0	2	1	0.5	0	0	-	1	0	0
I	1058167	A-G	-	intron	Y34D9A.10	0	0	-	2	1	0.5	1	0	0	0	0	-	0	0	-	0	0	-	1	1	1	2	1	0.5	0	0	-	1	0	0
I	1058173	A-G	-	intron	Y34D9A.10	0	0	-	2	2	1	1	1	1	0	0	-	0	0	-	0	0	-	1	0	0	2	1	0.5	0	0	-	1	1	1
I	1058174	A-G	-	intron	Y34D9A.10	0	0	-	2	0	0	1	1	1	0	0	-	0	0	-	0	0	-	1	1	1	2	1	0.5	0	0	-	1	1	1
I	1058189	A-G	-	intron	Y34D9A.10	0	0	-	2	1	0.5	1	1	1	0	0	-	0	0	-	0	0	-	1	1	1	2	2	1	0	0	-	1	0	0
I	1058190	A-G	-	intron	Y34D9A.10	0	0	-	2	2	1	1	1	1	0	0	-	0	0	-	0	0	-	1	1	1	2	2	1	0	0	-	1	1	1
I	1058191	A-G	-	intron	Y34D9A.10	0	0	-	2	2	1	1	1	1	0	0	-	0	0	-	0	0	-	1	0	0	2	1	0.5	0	0	-	1	1	1
I	1058196	A-G	-	intron	Y34D9A.10	0	0	-	2	2	1	1	1	1	0	0	-	0	0	-	0	0	-	1	1	1	3	3	1	0	0	-	1	1	1
I	1058203	A-G	-	intron	Y34D9A.10	0	0	-	1	1	1	1	1	1	0	0	-	0	0	-	0	0	-	1	1	1	3	2	0.666667	0	0	-	1	0	0
I	1058207	A-G	-	intron	Y34D9A.10	0	0	-	2	2	1	1	1	1	0	0	-	0	0	-	0	0	-	1	1	1	3	2	0.666667	0	0	-	1	1	1
I	1058212	A-G	-	intron	Y34D9A.10	0	0	-	2	2	1	1	0	0	0	0	-	0	0	-	0	0	-	1	0	0	3	1	0.333333	0	0	-	1	1	1
I	1058222	A-G	-	intron	Y34D9A.10	0	0	-	3	2	0.666667	1	0	0	0	0	-	0	0	-	0	0	-	1	1	1	3	0	0	0	0	-	0	0	-
I	1058227	A-G	-	intron	Y34D9A.10	0	0	-	3	2	0.666667	1	1	1	0	0	-	0	0	-	0	0	-	1	1	1	3	0	0	0	0	-	0	0	-
I	1058228	A-G	-	intron	Y34D9A.10	0	0	-	3	2	0.666667	1	1	1	0	0	-	0	0	-	0	0	-	1	1	1	3	0	0	0	0	-	0	0	-
I	1058245	A-G	-	intron	Y34D9A.10	0	0	-	3	3	1	1	1	1	0	0	-	0	0	-	0	0	-	1	1	1	2	2	1	0	0	-	0	0	-
I	1058246	A-G	-	intron	Y34D9A.10	0	0	-	3	3	1	1	0	0	0	0	-	0	0	-	0	0	-	1	0	0	2	1	0.5	0	0	-	0	0	-
I	1058252	A-G	-	intron	Y34D9A.10	0	0	-	2	2	1	1	1	1	0	0	-	0	0	-	0	0	-	1	0	0	1	0	0	0	0	-	0	0	-
I	1058255	A-G	-	intron	Y34D9A.10	0	0	-	2	2	1	1	0	0	0	0	-	0	0	-	0	0	-	1	0	0	1	1	1	0	0	-	0	0	-
I	1058256	A-G	-	intron	Y34D9A.10	0	0	-	2	2	1	1	1	1	0	0	-	0	0	-	0	0	-	1	1	1	1	1	1	0	0	-	0	0	-
I	1058262	A-G	-	intron	Y34D9A.10	0	0	-	2	2	1	1	1	1	0	0	-	0	0	-	0	0	-	0	0	-	1	0	0	0	0	-	0	0	-
I	1058270	A-G	-	intron	Y34D9A.10	0	0	-	2	2	1	0	0	-	0	0	-	0	0	-	0	0	-	0	0	-	1	1	1	0	0	-	0	0	-
I	1058275	A-G	-	intron	Y34D9A.10	0	0	-	2	2	1	0	0	-	0	0	-	0	0	-	0	0	-	0	0	-	1	1	1	0	0	-	0	0	-
I	1058278	A-G	-	intron	Y34D9A.10	0	0	-	2	2	1	0	0	-	0	0	-	0	0	-	0	0	-	0	0	-	1	0	0	0	0	-	0	0	-
I	1058499	A-G	-	intron	Y34D9A.10	0	0	-	0	0	-	0	0	-	0	0	-	0	0	-	0	0	-	0	0	-	1	1	1	0	0	-	1	1	1
I	1058509	A-G	-	intron	Y34D9A.10	0	0	-	0	0	-	0	0	-	0	0	-	0	0	-	0	0	-	0	0	-	1	1	1	0	0	-	1	1	1
I	1058548	A-G	-	intron	Y34D9A.10	0	0	-	0	0	-	0	0	-	0	0	-	0	0	-	0	0	-	0	0	-	1	1	1	0	0	-	1	1	1
I	1058565	A-G	-	intron	Y34D9A.10	0	0	-	0	0	-	0	0	-	0	0	-	0	0	-	0	0	-	0	0	-	1	1	1	0	0	-	1	1	1
I	1058575	A-G	-	intron	Y34D9A.10	0	0	-	0	0	-	0	0	-	0	0	-	0	0	-	0	0	-	0	0	-	1	1	1	0	0	-	1	1	1
I	1058590	A-G	-	intron	Y34D9A.10	0	0	-	0	0	-	0	0	-	0	0	-	0	0	-	0	0	-	0	0	-	1	1	1	0	0	-	1	1	1
I	1058643	A-G	-	intron	Y34D9A.10	1	1	1	0	0	-	0	0	-	0	0	-	0	0	-	0	0	-	2	2	1	0	0	-	0	0	-	0	0	-
I	1058649	A-G	-	intron	Y34D9A.10	1	1	1	0	0	-	0	0	-	0	0	-	0	0	-	0	0	-	2	2	1	0	0	-	0	0	-	0	0	-
I	1058670	A-G	-	intron	Y34D9A.10	1	1	1	0	0	-	0	0	-	0	0	-	0	0	-	0	0	-	2	2	1	0	0	-	0	0	-	0	0	-
I	1058671	A-G	-	intron	Y34D9A.10	1	1	1	0	0	-	0	0	-	0	0	-	0	0	-	0	0	-	2	2	1	0	0	-	0	0	-	0	0	-
I	10636360	A-G	-	downstream/upstream	B0511.13;B0511.8	0	0	-	6	3	0.5	4	0	0	0	0	-	1	0	0	2	0	0	0	0	-	3	1	0.333333	4	3	0.75	3	2	0.666667
I	1064093	A-G	-	intron	Y34D9A.10	0	0	-	1	0	0	0	0	-	0	0	-	1	0	0	2	2	1	0	0	-	0	0	-	0	0	-	0	0	-
I	1064115	A-G	-	intron	Y34D9A.10	0	0	-	0	0	-	0	0	-	0	0	-	1	1	1	2	2	1	0	0	-	0	0	-	0	0	-	0	0	-
I	1064120	A-G	-	intron	Y34D9A.10	0	0	-	1	1	1	0	0	-	0	0	-	1	1	1	2	1	0.5	0	0	-	0	0	-	0	0	-	0	0	-
I	1064125	A-G	-	intron	Y34D9A.10	0	0	-	0	0	-	0	0	-	0	0	-	1	1	1	2	2	1	0	0	-	0	0	-	0	0	-	0	0	-
I	1064130	A-G	-	intron	Y34D9A.10	0	0	-	1	1	1	0	0	-	0	0	-	1	1	1	2	2	1	0	0	-	0	0	-	0	0	-	0	0	-
I	1064131	A-G	-	intron	Y34D9A.10	0	0	-	0	0	-	0	0	-	0	0	-	1	1	1	2	2	1	0	0	-	0	0	-	0	0	-	0	0	-
I	1064138	A-G	-	intron	Y34D9A.10	0	0	-	1	1	1	0	0	-	0	0	-	1	0	0	2	2	1	0	0	-	0	0	-	0	0	-	0	0	-
I	1065182	A-G	+	3UTR	Y34D9A.2	8	0	0	13	0	0	5	0	0	4	0	0	2	0	0	2	0	0	10	1	0.1	57	7	0.122807	10	0	0	6	0	0
I	10728323	A-G	-	intron	B0205.13	0	0	-	2	1	0.5	0	0	-	0	0	-	0	0	-	0	0	-	0	0	-	4	2	0.5	0	0	-	0	0	-
I	10728325	A-G	-	intron	B0205.13	0	0	-	2	1	0.5	0	0	-	0	0	-	0	0	-	0	0	-	0	0	-	4	2	0.5	0	0	-	0	0	-
I	10731945	A-G	+	downstream	B0205.12	0	0	-	2	2	1	0	0	-	0	0	-	0	0	-	0	0	-	0	0	-	1	0	0	0	0	-	0	0	-
I	10731953	A-G	+	downstream	B0205.12	0	0	-	2	2	1	0	0	-	0	0	-	0	0	-	0	0	-	0	0	-	1	0	0	0	0	-	0	0	-
I	10731965	A-G	+	downstream	B0205.12	0	0	-	2	2	1	0	0	-	0	0	-	0	0	-	0	0	-	0	0	-	1	1	1	0	0	-	0	0	-
I	10731966	A-G	+	downstream	B0205.12	0	0	-	2	2	1	0	0	-	0	0	-	0	0	-	0	0	-	0	0	-	1	1	1	0	0	-	0	0	-
I	10731970	A-G	+	downstream	B0205.12	0	0	-	2	2	1	0	0	-	0	0	-	0	0	-	0	0	-	0	0	-	1	0	0	0	0	-	0	0	-
I	10732061	A-G	+	downstream	B0205.12	0	0	-	2	2	1	0	0	-	0	0	-	0	0	-	1	1	1	0	0	-	1	0	0	0	0	-	0	0	-
I	10748058	A-G	+	upstream	H36N01.4	0	0	-	0	0	-	0	0	-	0	0	-	0	0	-	0	0	-	0	0	-	1	1	1	1	1	1	0	0	-
I	10774375	A-G	+	intron	R13H8.1	1	0	0	1	1	1	2	0	0	2	0	0	0	0	-	1	0	0	0	0	-	3	0	0	2	1	0.5	2	1	0.5
I	10774383	A-G	+	intron	R13H8.1	1	1	1	1	1	1	2	0	0	2	2	1	0	0	-	1	0	0	0	0	-	3	2	0.666667	2	2	1	2	2	1
I	10774395	A-G	+	intron	R13H8.1	1	1	1	1	0	0	1	1	1	1	0	0	0	0	-	1	1	1	0	0	-	3	1	0.333333	2	1	0.5	2	0	0
I	10774396	A-G	+	intron	R13H8.1	1	1	1	1	0	0	1	1	1	1	0	0	0	0	-	1	1	1	0	0	-	1	0	0	2	1	0.5	2	0	0
I	10774400	A-G	+	intron	R13H8.1	0	0	-	1	1	1	1	1	1	1	0	0	0	0	-	1	1	1	0	0	-	1	1	1	2	1	0.5	2	2	1
I	10774407	A-G	+	intron	R13H8.1	1	1	1	1	1	1	2	2	1	2	2	1	0	0	-	1	1	1	0	0	-	1	1	1	2	2	1	2	2	1
I	10774413	A-G	+	intron	R13H8.1	1	0	0	1	1	1	2	1	0.5	2	0	0	0	0	-	1	0	0	0	0	-	1	1	1	2	0	0	2	2	1
I	10774422	A-G	+	intron	R13H8.1	1	1	1	1	0	0	2	1	0.5	2	1	0.5	0	0	-	1	0	0	0	0	-	3	0	0	2	0	0	2	1	0.5
I	10774429	A-G	+	intron	R13H8.1	1	1	1	1	1	1	2	2	1	2	2	1	0	0	-	1	1	1	0	0	-	3	2	0.666667	2	2	1	2	1	0.5
I	10774430	A-G	+	intron	R13H8.1	1	1	1	1	1	1	2	2	1	2	2	1	0	0	-	1	1	1	0	0	-	3	1	0.333333	2	2	1	2	0	0
I	10774431	A-G	+	intron	R13H8.1	1	0	0	1	1	1	2	0	0	2	2	1	0	0	-	1	1	1	0	0	-	3	0	0	2	1	0.5	2	1	0.5
I	10774613	A-G	+	intron	R13H8.1	0	0	-	1	1	1	1	1	1	0	0	-	0	0	-	0	0	-	0	0	-	0	0	-	0	0	-	0	0	-
I	10774626	A-G	+	intron	R13H8.1	0	0	-	1	1	1	1	1	1	0	0	-	0	0	-	0	0	-	0	0	-	1	0	0	0	0	-	0	0	-
I	10774627	A-G	+	intron	R13H8.1	0	0	-	1	1	1	1	1	1	0	0	-	0	0	-	0	0	-	0	0	-	1	0	0	0	0	-	0	0	-
I	10774639	A-G	+	intron	R13H8.1	0	0	-	2	2	1	1	0	0	0	0	-	0	0	-	0	0	-	0	0	-	1	0	0	0	0	-	0	0	-
I	10774649	A-G	+	intron	R13H8.1	0	0	-	2	2	1	1	1	1	0	0	-	0	0	-	0	0	-	0	0	-	1	0	0	0	0	-	0	0	-
I	10774652	A-G	+	intron	R13H8.1	0	0	-	2	2	1	1	0	0	0	0	-	0	0	-	0	0	-	0	0	-	1	0	0	0	0	-	0	0	-
I	10774672	A-G	+	intron	R13H8.1	0	0	-	3	3	1	1	0	0	0	0	-	0	0	-	0	0	-	0	0	-	1	0	0	0	0	-	0	0	-
I	10774681	A-G	+	intron	R13H8.1	0	0	-	3	2	0.666667	1	0	0	0	0	-	0	0	-	0	0	-	0	0	-	1	0	0	0	0	-	0	0	-
I	10774682	A-G	+	intron	R13H8.1	0	0	-	3	2	0.666667	1	1	1	0	0	-	0	0	-	0	0	-	0	0	-	1	0	0	0	0	-	0	0	-
I	10778667	A-G	-	antisense	R13H8.1	1	0	0	1	0	0	1	0	0	0	0	-	0	0	-	3	0	0	4	0	0	3	1	0.333333	0	0	-	1	1	1
I	10778668	A-G	-	antisense	R13H8.1	1	0	0	1	0	0	1	0	0	0	0	-	0	0	-	3	0	0	4	0	0	3	1	0.333333	0	0	-	1	1	1
I	10778675	A-G	-	antisense	R13H8.1	1	0	0	1	0	0	1	0	0	0	0	-	0	0	-	3	0	0	4	0	0	3	1	0.333333	0	0	-	1	1	1
I	10778678	A-G	-	antisense	R13H8.1	1	0	0	1	0	0	1	1	1	0	0	-	0	0	-	2	1	0.5	4	0	0	3	0	0	0	0	-	1	0	0
I	10778679	A-G	-	antisense	R13H8.1	1	0	0	1	0	0	1	1	1	0	0	-	0	0	-	3	1	0.333333	4	0	0	3	0	0	0	0	-	1	0	0
I	10778687	A-G	-	antisense	R13H8.1	1	0	0	2	0	0	1	1	1	0	0	-	1	0	0	6	1	0.166667	5	0	0	3	0	0	0	0	-	3	0	0
I	10778688	A-G	-	antisense	R13H8.1	1	0	0	2	0	0	1	1	1	0	0	-	1	1	1	6	2	0.333333	5	0	0	3	0	0	0	0	-	3	0	0
I	10778689	A-G	-	antisense	R13H8.1	1	0	0	2	0	0	1	1	1	0	0	-	1	1	1	6	3	0.5	5	0	0	3	1	0.333333	0	0	-	3	1	0.333333
I	10778706	A-G	-	integenic	-	1	0	0	2	0	0	1	1	1	0	0	-	1	1	1	6	3	0.5	5	0	0	4	1	0.25	0	0	-	3	1	0.333333
I	10778913	A-G	-	integenic	-	3	0	0	4	1	0.25	0	0	-	0	0	-	0	0	-	2	1	0.5	2	0	0	2	0	0	0	0	-	0	0	-
I	10778934	A-G	-	integenic	-	4	0	0	4	1	0.25	0	0	-	0	0	-	1	0	0	5	1	0.2	2	0	0	3	0	0	0	0	-	2	0	0
I	10778947	A-G	-	integenic	-	6	0	0	4	1	0.25	0	0	-	0	0	-	1	0	0	7	2	0.285714	1	0	0	10	2	0.2	0	0	-	8	3	0.375
I	10778948	A-G	-	integenic	-	6	0	0	4	1	0.25	0	0	-	0	0	-	1	0	0	7	3	0.428571	1	0	0	10	2	0.2	0	0	-	8	1	0.125
I	10778990	A-G	-	integenic	-	4	0	0	3	2	0.666667	0	0	-	0	0	-	1	0	0	6	2	0.333333	0	0	-	10	2	0.2	0	0	-	8	2	0.25
I	10779336	A-G	-	downstream	null	0	0	-	4	1	0.25	0	0	-	0	0	-	5	0	0	9	1	0.111111	0	0	-	3	0	0	0	0	-	5	0	0
I	10779373	A-G	-	downstream	null	0	0	-	5	2	0.4	0	0	-	0	0	-	6	1	0.166667	9	2	0.222222	1	0	0	2	1	0.5	0	0	-	6	1	0.166667
I	10779389	A-G	-	downstream	null	0	0	-	5	3	0.6	0	0	-	0	0	-	6	6	1	9	7	0.777778	1	0	0	3	2	0.666667	0	0	-	6	2	0.333333
I	10779390	A-G	-	downstream	null	0	0	-	5	2	0.4	0	0	-	0	0	-	6	3	0.5	9	3	0.333333	1	0	0	2	1	0.5	0	0	-	6	1	0.166667
I	10779391	A-G	-	downstream	null	0	0	-	5	3	0.6	0	0	-	0	0	-	6	2	0.333333	9	1	0.111111	1	0	0	2	0	0	0	0	-	6	0	0
I	10779409	A-G	-	downstream	null	0	0	-	5	0	0	0	0	-	0	0	-	6	0	0	6	2	0.333333	1	0	0	2	0	0	0	0	-	6	1	0.166667
I	10779415	A-G	-	downstream	null	0	0	-	4	1	0.25	0	0	-	0	0	-	4	1	0.25	6	3	0.5	1	0	0	2	1	0.5	0	0	-	4	1	0.25
I	10779416	A-G	-	downstream	null	0	0	-	4	1	0.25	0	0	-	0	0	-	4	1	0.25	5	3	0.6	1	0	0	2	1	0.5	0	0	-	4	0	0
I	10779420	A-G	-	downstream	null	0	0	-	4	0	0	0	0	-	0	0	-	5	0	0	6	3	0.5	1	0	0	2	0	0	0	0	-	6	1	0.166667
I	10779421	A-G	-	downstream	null	0	0	-	4	2	0.5	0	0	-	0	0	-	6	1	0.166667	6	4	0.666667	1	0	0	2	1	0.5	0	0	-	6	1	0.166667
I	10779422	A-G	-	downstream	null	0	0	-	4	0	0	0	0	-	0	0	-	6	1	0.166667	6	2	0.333333	1	0	0	3	1	0.333333	0	0	-	6	1	0.166667
I	10779443	A-G	-	downstream	null	0	0	-	2	0	0	0	0	-	0	0	-	4	1	0.25	7	1	0.142857	0	0	-	3	1	0.333333	0	0	-	6	1	0.166667
I	10779450	A-G	-	downstream	null	0	0	-	2	1	0.5	0	0	-	0	0	-	4	2	0.5	7	4	0.571429	0	0	-	3	2	0.666667	0	0	-	5	1	0.2
I	10779898	A-G	-	downstream	null	1	0	0	0	0	-	1	1	1	0	0	-	0	0	-	1	1	1	1	0	0	0	0	-	0	0	-	2	1	0.5
I	10779903	A-G	-	downstream	null	1	0	0	0	0	-	1	1	1	0	0	-	0	0	-	1	1	1	1	0	0	0	0	-	0	0	-	2	0	0
I	10779922	A-G	-	downstream	null	1	0	0	0	0	-	1	1	1	0	0	-	0	0	-	1	1	1	1	0	0	0	0	-	0	0	-	3	0	0
I	10779923	A-G	-	downstream	null	1	0	0	0	0	-	1	1	1	0	0	-	0	0	-	1	1	1	1	0	0	0	0	-	0	0	-	2	1	0.5
I	10779954	A-G	-	downstream	null	1	0	0	0	0	-	0	0	-	0	0	-	0	0	-	1	1	1	1	0	0	0	0	-	0	0	-	3	2	0.666667
I	10780072	A-G	-	downstream	null	1	0	0	3	3	1	0	0	-	0	0	-	1	1	1	2	0	0	0	0	-	0	0	-	0	0	-	2	1	0.5
I	10780079	A-G	-	downstream	null	1	0	0	3	3	1	1	1	1	0	0	-	1	1	1	1	1	1	0	0	-	0	0	-	0	0	-	2	1	0.5
I	10780124	A-G	-	downstream	null	0	0	-	3	3	1	0	0	-	0	0	-	1	0	0	1	0	0	0	0	-	0	0	-	0	0	-	1	0	0
I	10780134	A-G	-	downstream	null	0	0	-	3	2	0.666667	0	0	-	0	0	-	1	0	0	1	0	0	0	0	-	0	0	-	0	0	-	1	0	0
I	10781145	A-G	-	downstream	null	0	0	-	3	1	0.333333	0	0	-	0	0	-	0	0	-	2	1	0.5	0	0	-	2	0	0	0	0	-	3	0	0
I	10781301	A-G	-	noncoding	null	1	0	0	4	2	0.5	0	0	-	0	0	-	4	2	0.5	6	4	0.666667	0	0	-	3	2	0.666667	0	0	-	1	0	0
I	10781333	A-G	-	noncoding	null	1	0	0	3	0	0	0	0	-	0	0	-	5	1	0.2	6	1	0.166667	0	0	-	2	0	0	0	0	-	1	0	0
I	10781370	A-G	-	noncoding	null	1	0	0	4	0	0	0	0	-	0	0	-	5	1	0.2	6	1	0.166667	0	0	-	3	0	0	0	0	-	1	0	0
I	10781384	A-G	-	noncoding	null	1	0	0	3	0	0	0	0	-	0	0	-	5	1	0.2	6	1	0.166667	0	0	-	2	0	0	0	0	-	1	0	0
I	10781417	A-G	-	upstream	null	0	0	-	4	2	0.5	0	0	-	0	0	-	5	5	1	5	5	1	0	0	-	3	0	0	0	0	-	1	0	0
I	10781427	A-G	-	upstream	null	0	0	-	4	2	0.5	0	0	-	0	0	-	4	2	0.5	4	4	1	0	0	-	1	0	0	0	0	-	1	0	0
I	10781624	A-G	-	downstream/upstream	F55A3.5	0	0	-	6	1	0.166667	1	0	0	0	0	-	2	2	1	9	4	0.444444	0	0	-	3	1	0.333333	0	0	-	5	0	0
I	10781625	A-G	-	downstream/upstream	F55A3.5	0	0	-	6	1	0.166667	1	0	0	0	0	-	2	2	1	9	5	0.555556	0	0	-	4	1	0.25	0	0	-	5	3	0.6
I	10781626	A-G	-	downstream/upstream	F55A3.5	0	0	-	6	1	0.166667	1	0	0	0	0	-	2	2	1	9	5	0.555556	0	0	-	4	1	0.25	0	0	-	5	4	0.8
I	10781661	A-G	-	downstream/upstream	F55A3.5	0	0	-	7	1	0.142857	0	0	-	0	0	-	3	1	0.333333	7	1	0.142857	0	0	-	10	2	0.2	0	0	-	3	0	0
I	10781666	A-G	-	downstream/upstream	F55A3.5	0	0	-	6	0	0	0	0	-	0	0	-	3	1	0.333333	7	1	0.142857	0	0	-	11	2	0.181818	0	0	-	3	0	0
I	10781667	A-G	-	downstream/upstream	F55A3.5	0	0	-	6	1	0.166667	0	0	-	0	0	-	3	3	1	6	3	0.5	0	0	-	11	5	0.454545	0	0	-	3	1	0.333333
I	10781668	A-G	-	downstream/upstream	F55A3.5	0	0	-	6	2	0.333333	0	0	-	0	0	-	3	3	1	6	3	0.5	0	0	-	11	5	0.454545	0	0	-	3	1	0.333333
I	10781741	A-G	-	downstream/upstream	F55A3.5	0	0	-	4	0	0	0	0	-	0	0	-	2	1	0.5	4	1	0.25	0	0	-	5	3	0.6	0	0	-	0	0	-
I	10781742	A-G	-	downstream/upstream	F55A3.5	0	0	-	4	0	0	0	0	-	0	0	-	1	0	0	3	0	0	0	0	-	5	3	0.6	0	0	-	0	0	-
I	10781753	A-G	-	downstream/upstream	F55A3.5	0	0	-	4	0	0	0	0	-	0	0	-	2	0	0	3	0	0	0	0	-	6	4	0.666667	0	0	-	0	0	-
I	10781758	A-G	-	downstream/upstream	F55A3.5	0	0	-	4	0	0	0	0	-	0	0	-	2	0	0	3	2	0.666667	0	0	-	5	0	0	0	0	-	0	0	-
I	10781760	A-G	-	downstream/upstream	F55A3.5	0	0	-	4	0	0	0	0	-	0	0	-	2	0	0	3	0	0	0	0	-	5	2	0.4	0	0	-	0	0	-
I	10781809	A-G	-	downstream	F55A3.5	0	0	-	4	0	0	0	0	-	0	0	-	4	0	0	4	0	0	0	0	-	6	3	0.5	0	0	-	0	0	-
I	10781817	A-G	-	downstream	F55A3.5	0	0	-	4	1	0.25	0	0	-	0	0	-	3	0	0	3	1	0.333333	0	0	-	6	2	0.333333	0	0	-	0	0	-
I	10781820	A-G	-	downstream	F55A3.5	0	0	-	4	0	0	0	0	-	0	0	-	3	0	0	4	0	0	0	0	-	6	2	0.333333	0	0	-	0	0	-
I	10781823	A-G	-	downstream	F55A3.5	0	0	-	3	1	0.333333	0	0	-	0	0	-	3	0	0	4	1	0.25	0	0	-	4	3	0.75	0	0	-	0	0	-
I	10781824	A-G	-	downstream	F55A3.5	0	0	-	3	1	0.333333	0	0	-	0	0	-	3	0	0	4	2	0.5	0	0	-	3	2	0.666667	0	0	-	0	0	-
I	10781830	A-G	-	downstream	F55A3.5	0	0	-	3	0	0	0	0	-	0	0	-	3	0	0	4	0	0	0	0	-	2	2	1	0	0	-	0	0	-
I	10781831	A-G	-	downstream	F55A3.5	0	0	-	3	0	0	0	0	-	0	0	-	3	0	0	4	0	0	0	0	-	2	2	1	0	0	-	0	0	-
I	10781917	A-G	-	downstream	F55A3.5	0	0	-	1	0	0	0	0	-	0	0	-	2	1	0.5	3	0	0	0	0	-	5	2	0.4	0	0	-	2	0	0
I	10781920	A-G	-	downstream	F55A3.5	0	0	-	1	0	0	0	0	-	0	0	-	2	0	0	2	0	0	0	0	-	5	3	0.6	0	0	-	2	0	0
I	10806031	A-G	+	intron	F55A3.1	1	0	0	1	1	1	0	0	-	0	0	-	1	1	1	0	0	-	0	0	-	1	1	1	0	0	-	0	0	-
I	10813	A-G	-	upstream	Y74C9A.3	0	0	-	1	1	1	0	0	-	0	0	-	0	0	-	7	1	0.142857	0	0	-	2	2	1	0	0	-	0	0	-
I	10819145	A-G	+	downstream	C35E7.6	387	167	0.431525	173	79	0.456647	174	56	0.321839	51	19	0.372549	57	16	0.280702	41	26	0.634146	208	53	0.254808	248	103	0.415323	83	23	0.277108	13	3	0.230769
I	10819147	A-G	+	downstream	C35E7.6	390	174	0.446154	173	91	0.526012	176	65	0.369318	51	24	0.470588	57	18	0.315789	41	22	0.536585	209	21	0.100478	248	59	0.237903	84	6	0.0714286	13	1	0.0769231
I	10819169	A-G	+	downstream	C35E7.6	228	144	0.631579	83	56	0.674699	85	52	0.611765	27	20	0.740741	21	13	0.619048	16	12	0.75	100	6	0.06	116	13	0.112069	40	2	0.05	2	0	0
I	10819171	A-G	+	downstream	C35E7.6	227	21	0.092511	83	7	0.0843373	87	7	0.0804598	26	1	0.0384615	20	3	0.15	16	2	0.125	100	1	0.01	117	4	0.034188	40	1	0.025	2	0	0
I	10819178	A-G	+	downstream	C35E7.6	215	19	0.0883721	78	10	0.128205	84	13	0.154762	22	0	0	19	1	0.0526316	13	2	0.153846	97	2	0.0206186	110	7	0.0636364	38	2	0.0526316	2	0	0
I	10819179	A-G	+	downstream	C35E7.6	212	7	0.0330189	78	4	0.0512821	84	1	0.0119048	22	0	0	19	0	0	14	0	0	95	1	0.0105263	111	2	0.018018	39	0	0	2	0	0
I	10819183	A-G	+	downstream	C35E7.6	209	159	0.760766	78	68	0.871795	83	64	0.771084	23	18	0.782609	20	16	0.8	12	9	0.75	90	17	0.188889	105	34	0.32381	39	8	0.205128	2	2	1
I	10819184	A-G	+	downstream	C35E7.6	207	38	0.183575	78	21	0.269231	81	10	0.123457	24	3	0.125	20	3	0.15	12	5	0.416667	92	8	0.0869565	104	22	0.211538	40	3	0.075	2	0	0
I	10819185	A-G	+	downstream	C35E7.6	212	29	0.136792	79	20	0.253165	84	12	0.142857	24	4	0.166667	20	1	0.05	12	3	0.25	93	3	0.0322581	105	14	0.133333	40	4	0.1	2	0	0
I	10819186	A-G	+	downstream	C35E7.6	213	126	0.591549	80	60	0.75	84	40	0.47619	23	14	0.608696	20	11	0.55	13	11	0.846154	93	10	0.107527	104	30	0.288462	40	6	0.15	2	1	0.5
I	10819187	A-G	+	downstream	C35E7.6	217	53	0.24424	80	28	0.35	87	25	0.287356	25	6	0.24	21	3	0.142857	16	6	0.375	97	4	0.0412371	103	9	0.0873786	42	4	0.0952381	3	2	0.666667
I	10819188	A-G	+	downstream	C35E7.6	218	57	0.261468	82	33	0.402439	87	27	0.310345	25	6	0.24	21	6	0.285714	15	9	0.6	99	16	0.161616	104	21	0.201923	42	4	0.0952381	3	1	0.333333
I	10819193	A-G	+	downstream	C35E7.6	218	21	0.0963303	82	9	0.109756	85	16	0.188235	24	3	0.125	21	2	0.0952381	16	2	0.125	100	0	0	105	4	0.0380952	42	2	0.047619	3	0	0
I	10819196	A-G	+	downstream	C35E7.6	218	51	0.233945	82	28	0.341463	87	17	0.195402	25	11	0.44	21	8	0.380952	16	8	0.5	99	16	0.161616	108	38	0.351852	42	16	0.380952	3	1	0.333333
I	10819197	A-G	+	downstream	C35E7.6	218	4	0.0183486	81	4	0.0493827	87	2	0.0229885	24	0	0	20	0	0	15	0	0	98	1	0.0102041	114	5	0.0438596	42	3	0.0714286	3	0	0
I	10819198	A-G	+	downstream	C35E7.6	219	34	0.155251	81	22	0.271605	87	12	0.137931	24	5	0.208333	20	3	0.15	16	3	0.1875	99	19	0.191919	113	22	0.19469	42	8	0.190476	3	1	0.333333
I	10819199	A-G	+	downstream	C35E7.6	218	7	0.0321101	81	5	0.0617284	86	4	0.0465116	25	1	0.04	20	1	0.05	15	0	0	98	2	0.0204082	112	11	0.0982143	42	5	0.119048	3	1	0.333333
I	10819209	A-G	+	downstream	C35E7.6	208	1	0.00480769	80	4	0.05	82	3	0.0365854	23	1	0.0434783	19	0	0	15	0	0	85	1	0.0117647	103	5	0.0485437	37	3	0.0810811	3	0	0
I	10819211	A-G	+	downstream	C35E7.6	207	41	0.198068	80	32	0.4	87	20	0.229885	22	7	0.318182	19	6	0.315789	15	9	0.6	84	7	0.0833333	99	22	0.222222	38	5	0.131579	3	2	0.666667
I	10819221	A-G	+	downstream	C35E7.6	195	38	0.194872	77	15	0.194805	81	14	0.17284	24	3	0.125	18	1	0.0555556	15	5	0.333333	80	10	0.125	87	20	0.229885	36	5	0.138889	3	1	0.333333
I	10819224	A-G	+	downstream	C35E7.6	185	55	0.297297	73	25	0.342466	80	19	0.2375	23	7	0.304348	17	5	0.294118	15	5	0.333333	81	5	0.0617284	81	15	0.185185	34	4	0.117647	3	1	0.333333
I	10819229	A-G	+	downstream	C35E7.6	195	47	0.241026	80	35	0.4375	83	18	0.216867	23	6	0.26087	16	5	0.3125	15	8	0.533333	91	6	0.0659341	65	11	0.169231	38	2	0.0526316	3	2	0.666667
I	10819230	A-G	+	downstream	C35E7.6	202	56	0.277228	82	29	0.353659	86	24	0.27907	24	8	0.333333	18	2	0.111111	15	4	0.266667	94	6	0.0638298	64	11	0.171875	41	4	0.097561	3	2	0.666667
I	10819232	A-G	+	downstream	C35E7.6	215	11	0.0511628	81	6	0.0740741	83	2	0.0240964	25	1	0.04	20	2	0.1	16	3	0.1875	99	2	0.020202	58	0	0	43	0	0	3	0	0
I	10819233	A-G	+	downstream	C35E7.6	212	6	0.0283019	79	5	0.0632911	81	3	0.037037	24	1	0.0416667	19	0	0	16	2	0.125	99	1	0.010101	56	0	0	42	2	0.047619	3	0	0
I	10819238	A-G	+	downstream	C35E7.6	211	209	0.990521	82	82	1	84	84	1	25	24	0.96	20	20	1	17	17	1	100	93	0.93	75	70	0.933333	43	39	0.906977	3	3	1
I	10819254	A-G	+	downstream	C35E7.6	220	6	0.0272727	86	4	0.0465116	87	3	0.0344828	23	0	0	19	0	0	18	3	0.166667	102	7	0.0686275	124	7	0.0564516	45	4	0.0888889	3	0	0
I	10819257	A-G	+	downstream	C35E7.6	226	15	0.0663717	88	8	0.0909091	88	6	0.0681818	24	2	0.0833333	20	1	0.05	19	1	0.0526316	102	1	0.00980392	128	3	0.0234375	45	1	0.0222222	3	0	0
I	10819262	A-G	+	downstream	C35E7.6	224	53	0.236607	88	23	0.261364	88	18	0.204545	26	5	0.192308	21	7	0.333333	19	8	0.421053	100	17	0.17	128	37	0.289062	44	8	0.181818	3	0	0
I	10819268	A-G	+	downstream	C35E7.6	227	155	0.682819	89	58	0.651685	89	55	0.617978	23	18	0.782609	21	15	0.714286	19	14	0.736842	102	33	0.323529	128	61	0.476562	44	14	0.318182	4	3	0.75
I	10819269	A-G	+	downstream	C35E7.6	225	164	0.728889	91	70	0.769231	89	67	0.752809	26	17	0.653846	21	18	0.857143	19	13	0.684211	101	38	0.376238	127	75	0.590551	44	21	0.477273	4	1	0.25
I	10819270	A-G	+	downstream	C35E7.6	226	60	0.265487	90	30	0.333333	88	27	0.306818	26	4	0.153846	21	3	0.142857	19	5	0.263158	102	10	0.0980392	128	15	0.117188	44	5	0.113636	4	1	0.25
I	10819274	A-G	+	downstream	C35E7.6	226	71	0.314159	89	38	0.426966	89	29	0.325843	26	12	0.461538	21	4	0.190476	19	9	0.473684	103	23	0.223301	129	48	0.372093	43	13	0.302326	4	2	0.5
I	10819276	A-G	+	downstream	C35E7.6	227	169	0.744493	90	66	0.733333	89	67	0.752809	26	14	0.538462	21	14	0.666667	19	16	0.842105	103	50	0.485437	129	75	0.581395	43	25	0.581395	4	1	0.25
I	10819282	A-G	+	downstream	C35E7.6	225	43	0.191111	85	31	0.364706	85	22	0.258824	25	3	0.12	18	3	0.166667	19	6	0.315789	99	5	0.0505051	121	6	0.0495868	41	0	0	4	0	0
I	10819287	A-G	+	downstream	C35E7.6	197	61	0.309645	77	33	0.428571	69	18	0.26087	19	6	0.315789	16	5	0.3125	13	2	0.153846	88	26	0.295455	103	46	0.446602	35	11	0.314286	4	4	1
I	10819288	A-G	+	downstream	C35E7.6	190	72	0.378947	74	35	0.472973	66	18	0.272727	20	6	0.3	16	4	0.25	13	3	0.230769	86	32	0.372093	104	46	0.442308	35	12	0.342857	4	2	0.5
I	10819289	A-G	+	downstream	C35E7.6	191	45	0.235602	72	26	0.361111	67	13	0.19403	20	5	0.25	16	3	0.1875	13	0	0	84	33	0.392857	103	45	0.436893	35	7	0.2	4	1	0.25
I	10819291	A-G	+	downstream	C35E7.6	189	39	0.206349	72	11	0.152778	66	9	0.136364	20	5	0.25	16	3	0.1875	13	8	0.615385	83	9	0.108434	104	15	0.144231	35	6	0.171429	4	1	0.25
I	10819296	A-G	+	downstream	C35E7.6	191	94	0.492147	73	39	0.534247	68	26	0.382353	20	6	0.3	15	8	0.533333	13	10	0.769231	86	9	0.104651	105	33	0.314286	35	7	0.2	4	1	0.25
I	10819297	A-G	+	downstream	C35E7.6	191	53	0.277487	73	22	0.30137	68	14	0.205882	20	5	0.25	16	5	0.3125	13	6	0.461538	86	9	0.104651	104	33	0.317308	35	8	0.228571	4	1	0.25
I	10819298	A-G	+	downstream	C35E7.6	191	83	0.434555	73	36	0.493151	68	27	0.397059	20	9	0.45	16	6	0.375	13	10	0.769231	86	21	0.244186	104	38	0.365385	35	11	0.314286	4	1	0.25
I	10819299	A-G	+	downstream	C35E7.6	191	43	0.225131	73	22	0.30137	68	16	0.235294	20	7	0.35	16	2	0.125	13	6	0.461538	86	8	0.0930233	105	24	0.228571	35	4	0.114286	4	1	0.25
I	10819300	A-G	+	downstream	C35E7.6	191	5	0.026178	73	3	0.0410959	68	1	0.0147059	20	0	0	16	1	0.0625	13	0	0	86	0	0	104	7	0.0673077	35	0	0	4	0	0
I	10819303	A-G	+	downstream	C35E7.6	189	186	0.984127	72	71	0.986111	68	67	0.985294	20	20	1	16	16	1	13	13	1	86	86	1	104	102	0.980769	35	33	0.942857	4	4	1
I	10819319	A-G	+	downstream	C35E7.6	184	101	0.548913	71	34	0.478873	65	33	0.507692	19	9	0.473684	15	9	0.6	12	6	0.5	83	29	0.349398	94	46	0.489362	32	4	0.125	4	3	0.75
I	10819321	A-G	+	downstream	C35E7.6	183	53	0.289617	71	32	0.450704	66	17	0.257576	20	7	0.35	15	3	0.2	12	6	0.5	83	35	0.421687	95	53	0.557895	33	26	0.787879	4	3	0.75
I	10819341	A-G	+	downstream	C35E7.6	46	15	0.326087	18	9	0.5	10	2	0.2	3	2	0.666667	1	0	0	3	1	0.333333	16	0	0	14	0	0	4	0	0	2	1	0.5
I	10819342	A-G	+	downstream	C35E7.6	47	19	0.404255	18	6	0.333333	10	3	0.3	4	2	0.5	1	0	0	3	2	0.666667	16	0	0	14	2	0.142857	4	0	0	2	0	0
I	10819343	A-G	+	downstream	C35E7.6	47	12	0.255319	18	5	0.277778	9	5	0.555556	4	0	0	1	0	0	3	3	1	16	1	0.0625	13	4	0.307692	4	1	0.25	2	0	0
I	10819344	A-G	+	downstream	C35E7.6	47	9	0.191489	18	3	0.166667	9	1	0.111111	4	1	0.25	1	0	0	3	1	0.333333	16	1	0.0625	12	1	0.0833333	4	0	0	2	0	0
I	10819350	A-G	+	downstream	C35E7.6	47	6	0.12766	17	1	0.0588235	9	1	0.111111	4	0	0	1	0	0	3	1	0.333333	16	0	0	13	0	0	4	1	0.25	2	0	0
I	10819354	A-G	+	downstream	C35E7.6	47	13	0.276596	18	2	0.111111	10	2	0.2	4	1	0.25	1	0	0	3	2	0.666667	15	1	0.0666667	15	3	0.2	4	1	0.25	2	0	0
I	10819355	A-G	+	downstream	C35E7.6	46	6	0.130435	18	2	0.111111	10	2	0.2	4	1	0.25	1	0	0	3	1	0.333333	15	1	0.0666667	15	2	0.133333	4	1	0.25	2	0	0
I	10819356	A-G	+	downstream	C35E7.6	47	4	0.0851064	18	2	0.111111	10	1	0.1	4	0	0	1	0	0	3	0	0	15	0	0	16	1	0.0625	4	1	0.25	2	1	0.5
I	10819357	A-G	+	downstream	C35E7.6	47	3	0.0638298	18	0	0	10	1	0.1	4	0	0	1	0	0	3	0	0	15	3	0.2	15	2	0.133333	4	1	0.25	2	0	0
I	10819374	A-G	+	downstream	C35E7.6	56	18	0.321429	18	5	0.277778	14	3	0.214286	3	1	0.333333	2	0	0	3	1	0.333333	18	0	0	17	5	0.294118	9	4	0.444444	2	1	0.5
I	10819380	A-G	+	downstream	C35E7.6	59	35	0.59322	18	10	0.555556	14	6	0.428571	3	2	0.666667	2	0	0	4	3	0.75	18	12	0.666667	16	11	0.6875	9	6	0.666667	3	3	1
I	10819381	A-G	+	downstream	C35E7.6	62	61	0.983871	22	22	1	17	15	0.882353	3	3	1	2	2	1	5	5	1	19	19	1	17	16	0.941176	9	8	0.888889	3	3	1
I	10819382	A-G	+	downstream	C35E7.6	61	11	0.180328	22	7	0.318182	17	2	0.117647	3	1	0.333333	2	0	0	5	1	0.2	19	0	0	17	0	0	9	0	0	3	0	0
I	10819383	A-G	+	downstream	C35E7.6	62	10	0.16129	22	4	0.181818	17	2	0.117647	3	0	0	2	0	0	5	1	0.2	19	2	0.105263	17	1	0.0588235	9	0	0	4	1	0.25
I	10819384	A-G	+	downstream	C35E7.6	62	6	0.0967742	22	3	0.136364	17	0	0	3	0	0	2	0	0	5	1	0.2	19	2	0.105263	17	1	0.0588235	9	0	0	4	0	0
I	10819388	A-G	+	downstream	C35E7.6	63	9	0.142857	21	4	0.190476	17	5	0.294118	3	1	0.333333	2	0	0	5	2	0.4	19	4	0.210526	16	4	0.25	9	1	0.111111	3	1	0.333333
I	10819389	A-G	+	downstream	C35E7.6	63	29	0.460317	21	12	0.571429	17	10	0.588235	3	1	0.333333	2	1	0.5	5	2	0.4	19	8	0.421053	16	11	0.6875	9	5	0.555556	4	3	0.75
I	10819396	A-G	+	downstream	C35E7.6	64	4	0.0625	21	1	0.047619	19	2	0.105263	3	0	0	2	0	0	5	0	0	19	1	0.0526316	18	1	0.0555556	9	0	0	4	0	0
I	10819397	A-G	+	downstream	C35E7.6	64	5	0.078125	21	1	0.047619	19	1	0.0526316	3	0	0	2	0	0	5	0	0	19	0	0	19	0	0	9	0	0	4	0	0
I	10819406	A-G	+	downstream	C35E7.6	65	25	0.384615	20	9	0.45	19	7	0.368421	3	2	0.666667	2	1	0.5	5	3	0.6	19	5	0.263158	17	8	0.470588	9	5	0.555556	4	1	0.25
I	10819408	A-G	+	downstream	C35E7.6	66	3	0.0454545	20	1	0.05	19	2	0.105263	3	0	0	2	0	0	5	0	0	20	0	0	17	2	0.117647	10	0	0	4	0	0
I	10819416	A-G	+	downstream	C35E7.6	69	6	0.0869565	20	0	0	20	2	0.1	2	0	0	2	0	0	5	1	0.2	21	0	0	19	0	0	10	0	0	4	0	0
I	10819419	A-G	+	downstream	C35E7.6	70	9	0.128571	21	0	0	20	3	0.15	2	2	1	2	0	0	5	3	0.6	21	0	0	19	2	0.105263	10	0	0	4	0	0
I	10819442	A-G	+	downstream	C35E7.6	62	3	0.0483871	19	0	0	19	3	0.157895	3	1	0.333333	1	0	0	3	0	0	17	1	0.0588235	17	1	0.0588235	9	0	0	4	0	0
I	10819443	A-G	+	downstream	C35E7.6	60	6	0.1	20	2	0.1	19	0	0	3	1	0.333333	1	0	0	3	1	0.333333	18	1	0.0555556	17	2	0.117647	9	2	0.222222	4	0	0
I	10819452	A-G	+	downstream	C35E7.6	53	42	0.792453	16	12	0.75	18	12	0.666667	2	1	0.5	1	0	0	2	1	0.5	17	7	0.411765	13	7	0.538462	8	5	0.625	4	1	0.25
I	10819453	A-G	+	downstream	C35E7.6	53	7	0.132075	16	1	0.0625	18	0	0	2	0	0	1	0	0	2	0	0	17	3	0.176471	13	3	0.230769	9	2	0.222222	4	0	0
I	10819462	A-G	+	downstream	C35E7.6	49	19	0.387755	15	6	0.4	18	4	0.222222	2	0	0	2	0	0	3	1	0.333333	18	0	0	13	0	0	10	0	0	3	2	0.666667
I	10819468	A-G	+	downstream	C35E7.6	55	4	0.0727273	17	0	0	21	0	0	3	1	0.333333	2	0	0	3	0	0	17	0	0	13	0	0	10	0	0	4	1	0.25
I	10819469	A-G	+	downstream	C35E7.6	55	18	0.327273	17	3	0.176471	21	9	0.428571	3	0	0	2	1	0.5	3	2	0.666667	17	4	0.235294	14	3	0.214286	11	2	0.181818	4	2	0.5
I	10819473	A-G	+	downstream	C35E7.6	55	38	0.690909	17	13	0.764706	21	14	0.666667	3	3	1	2	1	0.5	3	2	0.666667	17	5	0.294118	16	5	0.3125	10	4	0.4	4	2	0.5
I	10819474	A-G	+	downstream	C35E7.6	55	7	0.127273	16	4	0.25	21	3	0.142857	3	0	0	2	0	0	3	0	0	17	0	0	16	1	0.0625	10	1	0.1	4	1	0.25
I	10819476	A-G	+	downstream	C35E7.6	55	8	0.145455	17	2	0.117647	21	3	0.142857	3	1	0.333333	1	0	0	3	1	0.333333	17	0	0	15	3	0.2	10	0	0	4	0	0
I	10819477	A-G	+	downstream	C35E7.6	55	8	0.145455	17	0	0	21	1	0.047619	3	0	0	2	0	0	3	1	0.333333	17	1	0.0588235	16	3	0.1875	10	1	0.1	4	1	0.25
I	10819485	A-G	+	downstream	C35E7.6	52	6	0.115385	15	1	0.0666667	21	4	0.190476	3	0	0	2	0	0	3	0	0	18	1	0.0555556	16	0	0	11	0	0	4	0	0
I	10819493	A-G	+	downstream	C35E7.6	51	33	0.647059	16	13	0.8125	20	14	0.7	3	3	1	2	1	0.5	3	1	0.333333	18	10	0.555556	13	8	0.615385	10	8	0.8	4	2	0.5
I	10819495	A-G	+	downstream	C35E7.6	52	3	0.0576923	16	2	0.125	20	3	0.15	3	0	0	1	0	0	3	0	0	18	0	0	13	0	0	10	0	0	4	0	0
I	10819502	A-G	+	downstream	C35E7.6	54	0	0	20	1	0.05	22	2	0.0909091	3	0	0	3	1	0.333333	4	1	0.25	19	1	0.0526316	16	3	0.1875	11	3	0.272727	4	0	0
I	10819507	A-G	+	downstream	C35E7.6	55	25	0.454545	21	12	0.571429	21	11	0.52381	3	2	0.666667	4	2	0.5	4	3	0.75	19	1	0.0526316	15	4	0.266667	12	1	0.0833333	4	0	0
I	10819508	A-G	+	downstream	C35E7.6	55	5	0.0909091	22	1	0.0454545	21	5	0.238095	3	0	0	4	1	0.25	4	0	0	20	0	0	15	0	0	12	1	0.0833333	4	0	0
I	10819511	A-G	+	downstream	C35E7.6	54	21	0.388889	23	3	0.130435	22	3	0.136364	4	1	0.25	4	1	0.25	4	2	0.5	21	3	0.142857	16	0	0	13	2	0.153846	5	2	0.4
I	10819513	A-G	+	downstream	C35E7.6	52	6	0.115385	23	0	0	21	0	0	4	0	0	4	0	0	4	0	0	20	0	0	17	0	0	14	1	0.0714286	5	1	0.2
I	10819514	A-G	+	downstream	C35E7.6	51	3	0.0588235	23	1	0.0434783	21	1	0.047619	3	0	0	4	0	0	4	0	0	21	1	0.047619	20	3	0.15	14	5	0.357143	4	0	0
I	10819519	A-G	+	downstream	C35E7.6	51	2	0.0392157	23	3	0.130435	22	4	0.181818	3	0	0	4	1	0.25	4	0	0	21	0	0	19	0	0	16	2	0.125	6	0	0
I	10819521	A-G	+	downstream	C35E7.6	52	3	0.0576923	22	4	0.181818	21	2	0.0952381	3	0	0	4	0	0	4	1	0.25	21	2	0.0952381	20	0	0	17	1	0.0588235	6	0	0
I	10819522	A-G	+	downstream	C35E7.6	52	15	0.288462	24	7	0.291667	20	6	0.3	3	2	0.666667	4	1	0.25	4	2	0.5	21	4	0.190476	21	8	0.380952	18	7	0.388889	6	2	0.333333
I	10819533	A-G	+	downstream	C35E7.6	61	14	0.229508	31	8	0.258065	25	2	0.08	5	0	0	5	1	0.2	4	0	0	28	5	0.178571	23	6	0.26087	22	6	0.272727	6	0	0
I	10819539	A-G	+	downstream	C35E7.6	70	4	0.0571429	34	2	0.0588235	25	3	0.12	5	1	0.2	6	1	0.166667	4	1	0.25	31	0	0	26	3	0.115385	28	1	0.0357143	6	0	0
I	10819544	A-G	+	downstream	C35E7.6	80	19	0.2375	40	7	0.175	27	2	0.0740741	5	1	0.2	8	0	0	4	0	0	35	5	0.142857	32	0	0	33	0	0	7	0	0
I	10819549	A-G	+	downstream	C35E7.6	86	16	0.186047	42	6	0.142857	29	6	0.206897	5	0	0	8	0	0	4	0	0	39	4	0.102564	32	4	0.125	34	3	0.0882353	8	2	0.25
I	10819554	A-G	+	downstream	C35E7.6	96	28	0.291667	51	12	0.235294	37	8	0.216216	5	1	0.2	10	5	0.5	4	2	0.5	42	2	0.047619	35	3	0.0857143	36	1	0.0277778	8	1	0.125
I	10819557	A-G	+	downstream	C35E7.6	96	3	0.03125	51	1	0.0196078	38	2	0.0526316	5	0	0	9	0	0	3	0	0	43	1	0.0232558	35	1	0.0285714	37	0	0	9	0	0
I	10819565	A-G	+	downstream	C35E7.6	96	2	0.0208333	52	1	0.0192308	37	0	0	6	0	0	10	1	0.1	2	0	0	40	5	0.125	40	3	0.075	36	2	0.0555556	8	2	0.25
I	10819569	A-G	+	downstream	C35E7.6	98	60	0.612245	56	36	0.642857	37	20	0.540541	6	5	0.833333	10	6	0.6	2	2	1	42	13	0.309524	41	8	0.195122	37	4	0.108108	8	4	0.5
I	10819570	A-G	+	downstream	C35E7.6	102	49	0.480392	57	25	0.438596	37	18	0.486486	6	5	0.833333	10	5	0.5	2	1	0.5	43	26	0.604651	41	18	0.439024	38	25	0.657895	8	6	0.75
I	10819573	A-G	+	downstream	C35E7.6	103	17	0.165049	56	13	0.232143	37	6	0.162162	6	0	0	10	1	0.1	2	1	0.5	43	7	0.162791	43	12	0.27907	38	15	0.394737	8	3	0.375
I	10819575	A-G	+	downstream	C35E7.6	103	20	0.194175	57	11	0.192982	37	7	0.189189	6	2	0.333333	10	2	0.2	2	0	0	42	4	0.0952381	43	4	0.0930233	38	6	0.157895	8	2	0.25
I	10819584	A-G	+	downstream	C35E7.6	103	15	0.145631	56	8	0.142857	36	11	0.305556	6	0	0	10	2	0.2	2	1	0.5	42	9	0.214286	43	6	0.139535	39	7	0.179487	9	3	0.333333
I	10819585	A-G	+	downstream	C35E7.6	102	19	0.186275	55	8	0.145455	36	9	0.25	6	1	0.166667	9	0	0	2	1	0.5	42	5	0.119048	43	3	0.0697674	39	5	0.128205	9	3	0.333333
I	10819607	A-G	+	downstream	C35E7.6	112	5	0.0446429	59	2	0.0338983	39	2	0.0512821	8	0	0	10	1	0.1	3	1	0.333333	47	0	0	38	1	0.0263158	40	1	0.025	8	0	0
I	10819608	A-G	+	downstream	C35E7.6	112	3	0.0267857	59	4	0.0677966	39	1	0.025641	8	0	0	10	1	0.1	3	0	0	47	0	0	37	1	0.027027	40	1	0.025	8	2	0.25
I	10819609	A-G	+	downstream	C35E7.6	112	3	0.0267857	59	4	0.0677966	39	1	0.025641	8	0	0	10	3	0.3	3	1	0.333333	46	2	0.0434783	40	0	0	40	1	0.025	8	2	0.25
I	10819622	A-G	+	downstream	C35E7.6	111	52	0.468468	56	30	0.535714	39	21	0.538462	9	5	0.555556	9	2	0.222222	3	3	1	45	6	0.133333	42	10	0.238095	36	6	0.166667	7	2	0.285714
I	10819625	A-G	+	downstream	C35E7.6	101	17	0.168317	48	8	0.166667	35	6	0.171429	9	0	0	9	3	0.333333	4	2	0.5	39	2	0.0512821	39	1	0.025641	34	1	0.0294118	8	0	0
I	10819631	A-G	+	downstream	C35E7.6	100	53	0.53	44	23	0.522727	33	16	0.484848	8	4	0.5	9	6	0.666667	4	4	1	37	8	0.216216	35	13	0.371429	32	7	0.21875	8	3	0.375
I	10819645	A-G	+	downstream	C35E7.6	105	105	1	50	47	0.94	35	33	0.942857	9	9	1	9	9	1	4	4	1	41	41	1	44	43	0.977273	37	36	0.972973	8	8	1
I	10819656	A-G	+	downstream	C35E7.6	106	91	0.858491	51	44	0.862745	35	24	0.685714	9	7	0.777778	10	5	0.5	4	4	1	41	12	0.292683	44	12	0.272727	39	10	0.25641	8	4	0.5
I	10819669	A-G	+	downstream	C35E7.6	101	1	0.00990099	49	2	0.0408163	33	4	0.121212	8	0	0	9	0	0	3	0	0	41	0	0	41	0	0	39	1	0.025641	8	0	0
I	10819672	A-G	+	downstream	C35E7.6	100	8	0.08	49	3	0.0612245	33	3	0.0909091	8	1	0.125	9	0	0	3	0	0	40	9	0.225	42	4	0.0952381	39	5	0.128205	8	2	0.25
I	10819680	A-G	+	downstream	C35E7.6	104	10	0.0961538	48	2	0.0416667	33	7	0.212121	8	0	0	9	2	0.222222	3	0	0	42	0	0	40	0	0	38	0	0	8	0	0
I	10819682	A-G	+	downstream	C35E7.6	104	85	0.817308	48	36	0.75	33	22	0.666667	8	5	0.625	9	7	0.777778	3	3	1	42	18	0.428571	39	11	0.282051	37	19	0.513514	8	7	0.875
I	10819686	A-G	+	downstream	C35E7.6	104	10	0.0961538	48	2	0.0416667	33	3	0.0909091	8	0	0	9	2	0.222222	3	1	0.333333	41	8	0.195122	44	4	0.0909091	38	3	0.0789474	7	1	0.142857
I	10819687	A-G	+	downstream	C35E7.6	104	39	0.375	48	17	0.354167	33	12	0.363636	8	4	0.5	9	5	0.555556	3	1	0.333333	41	14	0.341463	46	17	0.369565	38	13	0.342105	8	4	0.5
I	10819710	A-G	+	downstream	C35E7.6	95	94	0.989474	43	43	1	27	27	1	6	6	1	7	7	1	3	3	1	32	32	1	37	35	0.945946	35	35	1	7	7	1
I	10819712	A-G	+	downstream	C35E7.6	94	4	0.0425532	43	8	0.186047	27	1	0.037037	6	1	0.166667	7	0	0	2	1	0.5	32	1	0.03125	37	0	0	35	0	0	7	0	0
I	10819713	A-G	+	downstream	C35E7.6	94	9	0.0957447	43	5	0.116279	27	3	0.111111	6	0	0	7	0	0	3	2	0.666667	32	2	0.0625	37	7	0.189189	35	4	0.114286	7	2	0.285714
I	10819717	A-G	+	downstream	C35E7.6	94	20	0.212766	43	9	0.209302	27	5	0.185185	6	2	0.333333	7	2	0.285714	2	0	0	32	10	0.3125	37	9	0.243243	33	9	0.272727	7	2	0.285714
I	10819721	A-G	+	downstream	C35E7.6	98	67	0.683673	42	23	0.547619	27	12	0.444444	6	4	0.666667	7	4	0.571429	3	2	0.666667	33	7	0.212121	36	6	0.166667	34	12	0.352941	7	2	0.285714
I	10819726	A-G	+	downstream	C35E7.6	97	15	0.154639	41	2	0.0487805	26	3	0.115385	6	1	0.166667	7	1	0.142857	3	1	0.333333	32	1	0.03125	31	3	0.0967742	33	0	0	6	1	0.166667
I	10819729	A-G	+	downstream	C35E7.6	98	5	0.0510204	41	1	0.0243902	26	4	0.153846	6	0	0	7	0	0	3	2	0.666667	32	9	0.28125	33	5	0.151515	33	10	0.30303	6	3	0.5
I	10819730	A-G	+	downstream	C35E7.6	98	22	0.22449	41	9	0.219512	26	11	0.423077	6	0	0	7	1	0.142857	2	0	0	32	16	0.5	33	15	0.454545	34	13	0.382353	6	2	0.333333
I	10819737	A-G	+	downstream	C35E7.6	48	5	0.104167	15	5	0.333333	11	1	0.0909091	5	1	0.2	3	0	0	3	1	0.333333	16	3	0.1875	16	2	0.125	14	4	0.285714	2	0	0
I	10819749	A-G	+	downstream	C35E7.6	41	17	0.414634	9	2	0.222222	8	2	0.25	4	0	0	2	0	0	3	2	0.666667	12	5	0.416667	14	7	0.5	7	2	0.285714	1	0	0
I	10819750	A-G	+	downstream	C35E7.6	39	21	0.538462	9	4	0.444444	8	3	0.375	4	2	0.5	2	0	0	3	1	0.333333	11	7	0.636364	14	11	0.785714	7	6	0.857143	1	1	1
I	10819756	A-G	+	downstream	C35E7.6	33	0	0	8	0	0	4	1	0.25	4	0	0	1	0	0	3	1	0.333333	10	0	0	14	1	0.0714286	6	1	0.166667	1	0	0
I	10819758	A-G	+	downstream	C35E7.6	33	13	0.393939	9	4	0.444444	3	2	0.666667	5	5	1	0	0	-	3	1	0.333333	9	1	0.111111	15	3	0.2	7	0	0	0	0	-
I	10819759	A-G	+	downstream	C35E7.6	32	13	0.40625	9	6	0.666667	3	1	0.333333	5	5	1	0	0	-	3	3	1	10	7	0.7	14	7	0.5	7	3	0.428571	0	0	-
I	10819760	A-G	+	downstream	C35E7.6	32	1	0.03125	9	0	0	3	0	0	4	0	0	0	0	-	3	0	0	10	1	0.1	15	0	0	7	1	0.142857	0	0	-
I	10819885	A-G	+	downstream	C35E7.6	223	42	0.188341	127	31	0.244094	64	5	0.078125	13	2	0.153846	26	8	0.307692	23	9	0.391304	81	5	0.0617284	109	16	0.146789	53	3	0.0566038	17	0	0
I	10819886	A-G	+	downstream	C35E7.6	226	94	0.415929	129	65	0.503876	65	17	0.261538	13	3	0.230769	26	9	0.346154	23	20	0.869565	81	33	0.407407	108	42	0.388889	54	18	0.333333	16	3	0.1875
I	10819888	A-G	+	downstream	C35E7.6	230	3	0.0130435	130	6	0.0461538	67	1	0.0149254	13	1	0.0769231	26	0	0	23	3	0.130435	82	0	0	110	2	0.0181818	54	0	0	16	0	0
I	10819900	A-G	+	downstream	C35E7.6	235	53	0.225532	139	36	0.258993	74	14	0.189189	15	2	0.133333	24	5	0.208333	25	10	0.4	80	24	0.3	105	32	0.304762	55	13	0.236364	16	4	0.25
I	10819901	A-G	+	downstream	C35E7.6	239	81	0.338912	142	58	0.408451	75	28	0.373333	15	4	0.266667	24	7	0.291667	26	17	0.653846	80	44	0.55	107	57	0.53271	55	24	0.436364	17	10	0.588235
I	10819904	A-G	+	downstream	C35E7.6	238	6	0.0252101	148	1	0.00675676	78	0	0	15	0	0	24	0	0	26	3	0.115385	78	1	0.0128205	111	8	0.0720721	53	2	0.0377358	17	0	0
I	10819911	A-G	+	downstream	C35E7.6	243	45	0.185185	149	22	0.147651	79	8	0.101266	16	1	0.0625	25	2	0.08	24	7	0.291667	79	21	0.265823	102	42	0.411765	53	12	0.226415	18	3	0.166667
I	10819916	A-G	+	downstream	C35E7.6	241	7	0.0290456	149	2	0.0134228	79	1	0.0126582	16	0	0	24	0	0	25	1	0.04	76	2	0.0263158	95	6	0.0631579	52	2	0.0384615	17	0	0
I	10819926	A-G	+	downstream	C35E7.6	255	3	0.0117647	153	2	0.0130719	80	0	0	17	0	0	24	0	0	23	3	0.130435	86	5	0.0581395	111	19	0.171171	57	5	0.0877193	19	1	0.0526316
I	10819927	A-G	+	downstream	C35E7.6	254	8	0.0314961	153	14	0.0915033	80	5	0.0625	17	0	0	24	2	0.0833333	24	4	0.166667	87	6	0.0689655	111	16	0.144144	58	7	0.12069	19	1	0.0526316
I	10819928	A-G	+	downstream	C35E7.6	254	90	0.354331	152	70	0.460526	81	34	0.419753	16	6	0.375	24	8	0.333333	25	16	0.64	87	17	0.195402	112	39	0.348214	58	18	0.310345	19	4	0.210526
I	10819929	A-G	+	downstream	C35E7.6	252	128	0.507937	151	87	0.576159	80	42	0.525	17	10	0.588235	24	13	0.541667	24	12	0.5	88	12	0.136364	110	17	0.154545	58	14	0.241379	18	1	0.0555556
I	10819930	A-G	+	downstream	C35E7.6	253	136	0.537549	150	89	0.593333	79	50	0.632911	17	6	0.352941	24	16	0.666667	25	16	0.64	88	9	0.102273	108	20	0.185185	58	7	0.12069	18	1	0.0555556
I	10819932	A-G	+	downstream	C35E7.6	255	253	0.992157	150	148	0.986667	81	79	0.975309	17	16	0.941176	24	24	1	24	24	1	86	85	0.988372	108	106	0.981481	58	57	0.982759	18	18	1
I	10819952	A-G	+	downstream	C35E7.6	253	34	0.134387	143	29	0.202797	79	15	0.189873	16	3	0.1875	20	3	0.15	21	5	0.238095	85	5	0.0588235	106	5	0.0471698	57	2	0.0350877	16	0	0
I	10819959	A-G	+	downstream	C35E7.6	248	4	0.016129	148	10	0.0675676	80	1	0.0125	15	0	0	22	0	0	24	3	0.125	83	0	0	115	7	0.0608696	58	1	0.0172414	19	2	0.105263
I	10819960	A-G	+	downstream	C35E7.6	246	44	0.178862	148	40	0.27027	79	18	0.227848	15	1	0.0666667	22	3	0.136364	23	11	0.478261	82	6	0.0731707	112	22	0.196429	58	4	0.0689655	19	1	0.0526316
I	10819961	A-G	+	downstream	C35E7.6	244	13	0.0532787	147	16	0.108844	80	5	0.0625	15	2	0.133333	21	1	0.047619	23	4	0.173913	80	2	0.025	111	7	0.0630631	58	4	0.0689655	18	1	0.0555556
I	10819962	A-G	+	downstream	C35E7.6	246	30	0.121951	145	28	0.193103	80	13	0.1625	15	1	0.0666667	21	0	0	23	8	0.347826	80	3	0.0375	107	12	0.11215	58	7	0.12069	19	0	0
I	10819968	A-G	+	downstream	C35E7.6	242	8	0.0330579	142	7	0.0492958	77	2	0.025974	14	1	0.0714286	20	2	0.1	22	3	0.136364	75	0	0	95	3	0.0315789	57	2	0.0350877	16	1	0.0625
I	10819976	A-G	+	downstream	C35E7.6	232	6	0.0258621	144	5	0.0347222	78	0	0	16	0	0	20	0	0	23	2	0.0869565	79	0	0	78	0	0	53	0	0	19	0	0
I	10819983	A-G	+	downstream	C35E7.6	231	60	0.25974	146	60	0.410959	78	22	0.282051	15	6	0.4	23	6	0.26087	23	12	0.521739	76	29	0.381579	93	39	0.419355	52	23	0.442308	19	7	0.368421
I	10819985	A-G	+	downstream	C35E7.6	229	13	0.0567686	141	6	0.0425532	78	5	0.0641026	15	0	0	24	1	0.0416667	21	2	0.0952381	75	0	0	94	3	0.0319149	49	3	0.0612245	18	1	0.0555556
I	10819987	A-G	+	downstream	C35E7.6	231	118	0.510823	141	74	0.524823	76	42	0.552632	15	7	0.466667	24	12	0.5	21	13	0.619048	75	16	0.213333	93	26	0.27957	48	7	0.145833	18	1	0.0555556
I	10819995	A-G	+	downstream	C35E7.6	250	5	0.02	146	3	0.0205479	79	3	0.0379747	17	0	0	26	0	0	26	1	0.0384615	83	7	0.0843373	106	1	0.00943396	54	1	0.0185185	19	1	0.0526316
I	10819997	A-G	+	downstream	C35E7.6	250	196	0.784	145	106	0.731034	79	60	0.759494	17	14	0.823529	26	20	0.769231	26	23	0.884615	83	30	0.361446	102	49	0.480392	54	24	0.444444	19	8	0.421053
I	10819998	A-G	+	downstream	C35E7.6	250	237	0.948	146	133	0.910959	79	76	0.962025	17	16	0.941176	26	24	0.923077	26	24	0.923077	83	70	0.843373	105	94	0.895238	54	45	0.833333	19	18	0.947368
I	10820001	A-G	+	downstream	C35E7.6	250	102	0.408	145	67	0.462069	80	32	0.4	18	5	0.277778	26	10	0.384615	26	12	0.461538	83	16	0.192771	114	22	0.192982	54	13	0.240741	19	2	0.105263
I	10820002	A-G	+	downstream	C35E7.6	250	24	0.096	147	21	0.142857	80	6	0.075	18	1	0.0555556	26	4	0.153846	26	6	0.230769	83	9	0.108434	118	14	0.118644	54	6	0.111111	19	1	0.0526316
I	10820004	A-G	+	downstream	C35E7.6	249	8	0.0321285	147	13	0.0884354	79	2	0.0253165	18	0	0	26	0	0	26	3	0.115385	83	11	0.13253	126	20	0.15873	53	11	0.207547	19	0	0
I	10820005	A-G	+	downstream	C35E7.6	249	60	0.240964	146	45	0.308219	79	15	0.189873	18	5	0.277778	26	2	0.0769231	26	15	0.576923	83	30	0.361446	124	55	0.443548	53	19	0.358491	19	9	0.473684
I	10820015	A-G	+	downstream	C35E7.6	199	1	0.00502513	127	1	0.00787402	59	2	0.0338983	15	0	0	21	0	0	21	0	0	68	0	0	105	6	0.0571429	42	4	0.0952381	12	0	0
I	10820024	A-G	+	downstream	C35E7.6	169	63	0.372781	106	49	0.462264	48	17	0.354167	15	7	0.466667	19	7	0.368421	15	11	0.733333	56	10	0.178571	85	27	0.317647	31	7	0.225806	7	2	0.285714
I	10820025	A-G	+	downstream	C35E7.6	156	120	0.769231	101	80	0.792079	46	31	0.673913	14	10	0.714286	18	14	0.777778	14	14	1	49	33	0.673469	81	58	0.716049	27	16	0.592593	7	3	0.428571
I	10820026	A-G	+	downstream	C35E7.6	155	32	0.206452	101	21	0.207921	45	8	0.177778	14	0	0	19	2	0.105263	14	2	0.142857	49	22	0.44898	82	40	0.487805	27	12	0.444444	6	2	0.333333
I	10820027	A-G	+	downstream	C35E7.6	156	8	0.0512821	101	2	0.019802	46	1	0.0217391	14	0	0	19	0	0	14	6	0.428571	49	4	0.0816327	82	10	0.121951	27	4	0.148148	6	3	0.5
I	10820032	A-G	+	downstream	C35E7.6	156	40	0.25641	101	39	0.386139	47	13	0.276596	14	5	0.357143	19	6	0.315789	14	6	0.428571	48	8	0.166667	85	13	0.152941	26	3	0.115385	5	0	0
I	10820035	A-G	+	downstream	C35E7.6	153	8	0.0522876	96	3	0.03125	44	0	0	14	1	0.0714286	16	0	0	14	1	0.0714286	48	0	0	84	0	0	25	0	0	6	0	0
I	10820038	A-G	+	downstream	C35E7.6	149	25	0.167785	97	25	0.257732	45	7	0.155556	15	4	0.266667	17	1	0.0588235	14	6	0.428571	49	2	0.0408163	80	5	0.0625	26	0	0	6	0	0
I	10820039	A-G	+	downstream	C35E7.6	150	71	0.473333	97	62	0.639175	46	22	0.478261	15	9	0.6	17	7	0.411765	14	11	0.785714	49	11	0.22449	81	25	0.308642	26	5	0.192308	6	2	0.333333
I	10820040	A-G	+	downstream	C35E7.6	150	60	0.4	97	43	0.443299	46	20	0.434783	15	3	0.2	17	5	0.294118	14	5	0.357143	50	3	0.06	81	13	0.160494	26	1	0.0384615	6	2	0.333333
I	10820041	A-G	+	downstream	C35E7.6	150	9	0.06	97	6	0.0618557	46	4	0.0869565	15	0	0	17	3	0.176471	14	1	0.0714286	50	0	0	83	3	0.0361446	26	0	0	6	1	0.166667
I	10820047	A-G	+	downstream	C35E7.6	154	10	0.0649351	94	10	0.106383	45	3	0.0666667	15	0	0	17	1	0.0588235	13	2	0.153846	51	2	0.0392157	84	8	0.0952381	25	0	0	6	1	0.166667
I	10820050	A-G	+	downstream	C35E7.6	160	2	0.0125	96	1	0.0104167	46	0	0	14	1	0.0714286	19	0	0	15	2	0.133333	53	0	0	88	2	0.0227273	28	0	0	8	0	0
I	10820059	A-G	+	downstream	C35E7.6	162	4	0.0246914	95	2	0.0210526	47	2	0.0425532	14	0	0	19	0	0	15	2	0.133333	54	1	0.0185185	88	0	0	29	0	0	8	0	0
I	10820066	A-G	+	downstream	C35E7.6	162	6	0.037037	95	8	0.0842105	46	3	0.0652174	14	0	0	20	0	0	15	1	0.0666667	54	1	0.0185185	86	9	0.104651	29	2	0.0689655	8	0	0
I	10820067	A-G	+	downstream	C35E7.6	165	9	0.0545455	97	10	0.103093	50	4	0.08	14	1	0.0714286	20	2	0.1	15	3	0.2	57	4	0.0701754	90	11	0.122222	29	4	0.137931	9	0	0
I	10820071	A-G	+	downstream	C35E7.6	146	2	0.0136986	83	1	0.0120482	41	0	0	13	1	0.0769231	17	1	0.0588235	13	2	0.153846	53	0	0	83	2	0.0240964	28	3	0.107143	10	1	0.1
I	10820072	A-G	+	downstream	C35E7.6	126	11	0.0873016	73	9	0.123288	34	3	0.0882353	11	1	0.0909091	12	1	0.0833333	10	2	0.2	43	4	0.0930233	73	7	0.0958904	23	2	0.0869565	9	0	0
I	10820075	A-G	+	downstream	C35E7.6	116	100	0.862069	67	55	0.820896	34	28	0.823529	12	10	0.833333	11	10	0.909091	10	9	0.9	41	28	0.682927	69	50	0.724638	22	16	0.727273	9	6	0.666667
I	10820079	A-G	+	downstream	C35E7.6	104	14	0.134615	55	6	0.109091	26	5	0.192308	12	3	0.25	9	2	0.222222	9	1	0.111111	39	0	0	58	7	0.12069	21	2	0.0952381	9	1	0.111111
I	10820081	A-G	+	downstream	C35E7.6	90	1	0.0111111	49	3	0.0612245	24	1	0.0416667	10	1	0.1	6	1	0.166667	8	4	0.5	38	3	0.0789474	51	5	0.0980392	22	1	0.0454545	8	1	0.125
I	10820082	A-G	+	downstream	C35E7.6	86	21	0.244186	47	15	0.319149	23	7	0.304348	9	4	0.444444	6	1	0.166667	8	8	1	38	12	0.315789	45	19	0.422222	22	10	0.454545	8	2	0.25
I	10820083	A-G	+	downstream	C35E7.6	85	9	0.105882	43	2	0.0465116	23	2	0.0869565	8	0	0	6	2	0.333333	8	2	0.25	38	3	0.0789474	46	6	0.130435	22	2	0.0909091	8	0	0
I	10820087	A-G	+	downstream	C35E7.6	81	5	0.0617284	43	7	0.162791	23	0	0	8	0	0	5	0	0	8	1	0.125	36	2	0.0555556	45	0	0	22	1	0.0454545	8	1	0.125
I	10820089	A-G	+	downstream	C35E7.6	78	11	0.141026	41	8	0.195122	22	4	0.181818	8	1	0.125	5	2	0.4	7	1	0.142857	36	1	0.0277778	44	4	0.0909091	19	1	0.0526316	6	0	0
I	10820093	A-G	+	downstream	C35E7.6	48	9	0.1875	23	2	0.0869565	16	3	0.1875	5	0	0	3	1	0.333333	1	1	1	22	2	0.0909091	27	4	0.148148	12	1	0.0833333	6	0	0
I	10820095	A-G	+	downstream	C35E7.6	42	1	0.0238095	18	2	0.111111	14	0	0	5	2	0.4	3	0	0	1	0	0	22	0	0	23	1	0.0434783	10	1	0.1	5	0	0
I	10820102	A-G	+	downstream	C35E7.6	42	8	0.190476	18	7	0.388889	14	3	0.214286	5	2	0.4	3	0	0	1	0	0	22	1	0.0454545	22	1	0.0454545	10	0	0	6	2	0.333333
I	10820103	A-G	+	downstream	C35E7.6	42	19	0.452381	18	6	0.333333	14	4	0.285714	5	3	0.6	3	2	0.666667	1	1	1	22	4	0.181818	23	3	0.130435	10	0	0	6	0	0
I	10820114	A-G	+	downstream	C35E7.6	41	3	0.0731707	18	2	0.111111	14	1	0.0714286	4	0	0	3	0	0	0	0	-	22	0	0	21	0	0	10	0	0	6	0	0
I	10820117	A-G	+	downstream	C35E7.6	42	6	0.142857	17	5	0.294118	14	3	0.214286	4	2	0.5	3	0	0	1	0	0	21	1	0.047619	21	1	0.047619	10	1	0.1	6	0	0
I	10820121	A-G	+	downstream	C35E7.6	40	2	0.05	17	1	0.0588235	13	0	0	4	0	0	3	0	0	1	0	0	19	0	0	19	0	0	10	0	0	6	1	0.166667
I	10820126	A-G	+	downstream	C35E7.6	41	37	0.902439	15	10	0.666667	13	11	0.846154	4	3	0.75	3	2	0.666667	1	1	1	17	4	0.235294	19	7	0.368421	9	2	0.222222	6	3	0.5
I	10820127	A-G	+	downstream	C35E7.6	40	39	0.975	15	13	0.866667	14	11	0.785714	4	4	1	3	2	0.666667	1	1	1	17	15	0.882353	19	16	0.842105	9	9	1	6	5	0.833333
I	10820132	A-G	+	downstream	C35E7.6	39	16	0.410256	15	6	0.4	14	4	0.285714	5	1	0.2	3	0	0	1	1	1	18	5	0.277778	20	7	0.35	10	2	0.2	6	1	0.166667
I	10820133	A-G	+	downstream	C35E7.6	39	9	0.230769	16	4	0.25	14	4	0.285714	5	0	0	4	0	0	1	1	1	19	8	0.421053	19	4	0.210526	10	0	0	5	2	0.4
I	10820138	A-G	+	downstream	C35E7.6	41	4	0.097561	18	2	0.111111	14	0	0	4	0	0	6	1	0.166667	1	0	0	20	0	0	16	0	0	10	0	0	6	0	0
I	10820140	A-G	+	downstream	C35E7.6	41	4	0.097561	18	2	0.111111	14	2	0.142857	4	0	0	6	1	0.166667	1	1	1	20	0	0	14	2	0.142857	11	0	0	6	0	0
I	10820141	A-G	+	downstream	C35E7.6	42	6	0.142857	18	1	0.0555556	14	0	0	4	0	0	6	0	0	1	1	1	20	3	0.15	15	6	0.4	11	2	0.181818	6	4	0.666667
I	10820158	A-G	+	downstream	C35E7.6	41	4	0.097561	18	2	0.111111	14	4	0.285714	4	2	0.5	6	0	0	0	0	-	17	2	0.117647	16	1	0.0625	10	2	0.2	6	2	0.333333
I	10820164	A-G	+	downstream	C35E7.6	48	15	0.3125	19	2	0.105263	16	2	0.125	4	2	0.5	8	2	0.25	1	0	0	25	6	0.24	18	6	0.333333	12	4	0.333333	6	2	0.333333
I	10820170	A-G	+	downstream	C35E7.6	51	36	0.705882	21	12	0.571429	17	9	0.529412	5	4	0.8	8	6	0.75	2	1	0.5	27	9	0.333333	27	7	0.259259	13	4	0.307692	6	1	0.166667
I	10820171	A-G	+	downstream	C35E7.6	53	20	0.377358	21	8	0.380952	17	5	0.294118	5	3	0.6	8	2	0.25	2	0	0	27	3	0.111111	27	7	0.259259	13	1	0.0769231	6	1	0.166667
I	10820177	A-G	+	downstream	C35E7.6	56	14	0.25	21	6	0.285714	18	4	0.222222	5	1	0.2	8	1	0.125	2	1	0.5	27	6	0.222222	28	10	0.357143	13	3	0.230769	6	2	0.333333
I	10820178	A-G	+	downstream	C35E7.6	56	28	0.5	22	7	0.318182	19	8	0.421053	5	2	0.4	8	3	0.375	2	0	0	27	5	0.185185	27	9	0.333333	13	2	0.153846	6	1	0.166667
I	10820179	A-G	+	downstream	C35E7.6	56	11	0.196429	21	2	0.0952381	20	4	0.2	5	1	0.2	8	0	0	2	0	0	27	5	0.185185	27	3	0.111111	13	1	0.0769231	6	1	0.166667
I	10820180	A-G	+	downstream	C35E7.6	57	15	0.263158	21	10	0.47619	20	5	0.25	5	1	0.2	8	1	0.125	2	2	1	28	9	0.321429	27	6	0.222222	13	0	0	6	0	0
I	10820181	A-G	+	downstream	C35E7.6	56	13	0.232143	22	7	0.318182	20	6	0.3	5	0	0	8	1	0.125	3	2	0.666667	28	3	0.107143	27	4	0.148148	13	0	0	6	0	0
I	10820186	A-G	+	downstream	C35E7.6	57	16	0.280702	23	3	0.130435	21	1	0.047619	5	1	0.2	8	2	0.25	3	0	0	29	6	0.206897	27	6	0.222222	14	5	0.357143	6	1	0.166667
I	10820189	A-G	+	downstream	C35E7.6	60	3	0.05	28	5	0.178571	24	2	0.0833333	5	0	0	9	1	0.111111	3	0	0	33	3	0.0909091	27	5	0.185185	14	1	0.0714286	6	0	0
I	10820190	A-G	+	downstream	C35E7.6	60	1	0.0166667	28	2	0.0714286	25	1	0.04	4	0	0	9	0	0	3	0	0	34	3	0.0882353	27	0	0	14	0	0	6	0	0
I	10820191	A-G	+	downstream	C35E7.6	60	8	0.133333	29	3	0.103448	25	3	0.12	4	0	0	9	0	0	3	1	0.333333	35	1	0.0285714	27	3	0.111111	14	0	0	6	1	0.166667
I	10820197	A-G	+	downstream	C35E7.6	63	41	0.650794	31	18	0.580645	26	14	0.538462	4	4	1	9	5	0.555556	3	3	1	35	21	0.6	30	17	0.566667	14	5	0.357143	6	4	0.666667
I	10820198	A-G	+	downstream	C35E7.6	63	19	0.301587	30	7	0.233333	26	6	0.230769	4	1	0.25	9	2	0.222222	3	0	0	35	21	0.6	30	8	0.266667	14	6	0.428571	6	4	0.666667
I	10820199	A-G	+	downstream	C35E7.6	63	11	0.174603	30	7	0.233333	26	6	0.230769	4	0	0	9	0	0	3	1	0.333333	35	9	0.257143	30	6	0.2	14	3	0.214286	6	2	0.333333
I	10820203	A-G	+	downstream	C35E7.6	63	18	0.285714	31	8	0.258065	26	8	0.307692	4	1	0.25	9	2	0.222222	3	2	0.666667	35	4	0.114286	31	5	0.16129	14	2	0.142857	6	1	0.166667
I	10820204	A-G	+	downstream	C35E7.6	64	57	0.890625	31	27	0.870968	26	23	0.884615	4	4	1	9	6	0.666667	3	3	1	35	20	0.571429	32	22	0.6875	14	10	0.714286	6	4	0.666667
I	10820218	A-G	+	downstream	C35E7.6	67	48	0.716418	28	24	0.857143	26	18	0.692308	4	2	0.5	9	7	0.777778	3	2	0.666667	36	16	0.444444	31	13	0.419355	14	6	0.428571	5	1	0.2
I	10820223	A-G	+	downstream	C35E7.6	74	4	0.0540541	29	1	0.0344828	26	0	0	4	0	0	9	0	0	3	1	0.333333	38	1	0.0263158	29	1	0.0344828	14	0	0	6	0	0
I	10820235	A-G	+	downstream	C35E7.6	75	10	0.133333	26	3	0.115385	24	2	0.0833333	3	1	0.333333	7	0	0	3	1	0.333333	36	0	0	28	3	0.107143	12	0	0	5	0	0
I	10820240	A-G	+	downstream	C35E7.6	68	44	0.647059	25	19	0.76	23	14	0.608696	2	2	1	6	3	0.5	3	2	0.666667	32	7	0.21875	23	10	0.434783	12	2	0.166667	5	2	0.4
I	10820241	A-G	+	downstream	C35E7.6	70	33	0.471429	25	10	0.4	24	15	0.625	2	1	0.5	6	0	0	3	2	0.666667	32	6	0.1875	23	8	0.347826	12	1	0.0833333	5	1	0.2
I	10820242	A-G	+	downstream	C35E7.6	71	21	0.295775	24	9	0.375	25	9	0.36	2	0	0	7	0	0	3	2	0.666667	32	0	0	23	1	0.0434783	12	1	0.0833333	5	0	0
I	10820246	A-G	+	downstream	C35E7.6	71	13	0.183099	24	1	0.0416667	26	5	0.192308	2	1	0.5	8	1	0.125	3	1	0.333333	32	2	0.0625	23	2	0.0869565	12	0	0	5	0	0
I	10820247	A-G	+	downstream	C35E7.6	72	5	0.0694444	24	3	0.125	26	3	0.115385	2	0	0	9	0	0	3	1	0.333333	32	0	0	23	1	0.0434783	12	1	0.0833333	5	0	0
I	10820250	A-G	+	downstream	C35E7.6	73	43	0.589041	25	15	0.6	26	10	0.384615	2	0	0	9	2	0.222222	3	2	0.666667	32	14	0.4375	23	10	0.434783	12	2	0.166667	5	2	0.4
I	10820251	A-G	+	downstream	C35E7.6	73	3	0.0410959	25	0	0	26	1	0.0384615	2	0	0	9	0	0	3	0	0	32	1	0.03125	23	2	0.0869565	13	3	0.230769	5	1	0.2
I	10820253	A-G	+	downstream	C35E7.6	73	26	0.356164	24	7	0.291667	26	11	0.423077	2	1	0.5	8	1	0.125	3	1	0.333333	32	6	0.1875	22	9	0.409091	13	5	0.384615	5	1	0.2
I	10820254	A-G	+	downstream	C35E7.6	71	8	0.112676	24	2	0.0833333	25	1	0.04	2	1	0.5	9	1	0.111111	3	0	0	32	1	0.03125	23	2	0.0869565	14	1	0.0714286	4	0	0
I	10820259	A-G	+	downstream	C35E7.6	58	4	0.0689655	17	2	0.117647	19	1	0.0526316	1	0	0	10	0	0	2	0	0	28	4	0.142857	17	0	0	11	1	0.0909091	2	0	0
I	10820263	A-G	+	downstream	C35E7.6	53	19	0.358491	14	8	0.571429	17	5	0.294118	1	0	0	9	0	0	2	0	0	24	1	0.0416667	14	3	0.214286	10	0	0	0	0	-
I	10820264	A-G	+	downstream	C35E7.6	55	18	0.327273	13	8	0.615385	18	6	0.333333	1	0	0	9	0	0	2	0	0	24	1	0.0416667	14	2	0.142857	10	0	0	0	0	-
I	10820275	A-G	+	downstream	C35E7.6	57	26	0.45614	16	9	0.5625	21	8	0.380952	1	0	0	9	1	0.111111	3	3	1	31	12	0.387097	20	6	0.3	9	3	0.333333	0	0	-
I	10820276	A-G	+	downstream	C35E7.6	58	28	0.482759	16	9	0.5625	22	11	0.5	1	0	0	9	0	0	3	3	1	31	8	0.258065	19	5	0.263158	9	0	0	0	0	-
I	10820281	A-G	+	downstream	C35E7.6	59	44	0.745763	18	11	0.611111	23	17	0.73913	1	1	1	9	6	0.666667	3	2	0.666667	32	19	0.59375	21	17	0.809524	11	5	0.454545	0	0	-
I	10820291	A-G	+	downstream	C35E7.6	59	5	0.0847458	19	0	0	23	2	0.0869565	1	0	0	9	2	0.222222	4	1	0.25	32	5	0.15625	22	6	0.272727	11	1	0.0909091	0	0	-
I	10820292	A-G	+	downstream	C35E7.6	59	2	0.0338983	19	0	0	23	0	0	1	0	0	9	0	0	4	0	0	32	0	0	22	5	0.227273	11	1	0.0909091	0	0	-
I	10820293	A-G	+	downstream	C35E7.6	59	5	0.0847458	19	0	0	23	0	0	1	0	0	9	0	0	4	0	0	32	3	0.09375	21	0	0	11	1	0.0909091	0	0	-
I	10820295	A-G	+	downstream	C35E7.6	59	28	0.474576	17	5	0.294118	23	8	0.347826	1	0	0	9	2	0.222222	4	1	0.25	32	30	0.9375	22	21	0.954545	11	10	0.909091	0	0	-
I	10820301	A-G	+	downstream	C35E7.6	60	24	0.4	18	8	0.444444	23	6	0.26087	1	0	0	13	4	0.307692	5	2	0.4	35	3	0.0857143	24	4	0.166667	12	2	0.166667	0	0	-
I	10820302	A-G	+	downstream	C35E7.6	60	49	0.816667	19	15	0.789474	22	15	0.681818	1	1	1	13	9	0.692308	5	5	1	35	6	0.171429	24	6	0.25	12	3	0.25	0	0	-
I	10820303	A-G	+	downstream	C35E7.6	61	59	0.967213	19	18	0.947368	23	22	0.956522	1	1	1	14	14	1	5	5	1	35	5	0.142857	24	6	0.25	12	2	0.166667	0	0	-
I	10820304	A-G	+	downstream	C35E7.6	62	54	0.870968	19	19	1	22	22	1	1	1	1	15	15	1	5	5	1	35	4	0.114286	24	6	0.25	12	1	0.0833333	0	0	-
I	10820308	A-G	+	downstream	C35E7.6	67	2	0.0298507	20	1	0.05	22	1	0.0454545	1	0	0	19	0	0	5	0	0	38	3	0.0789474	28	0	0	12	0	0	0	0	-
I	10820310	A-G	+	downstream	C35E7.6	67	3	0.0447761	21	4	0.190476	23	1	0.0434783	1	0	0	21	0	0	5	0	0	39	0	0	28	0	0	12	0	0	0	0	-
I	10820316	A-G	+	downstream	C35E7.6	69	53	0.768116	20	16	0.8	26	17	0.653846	1	1	1	21	13	0.619048	5	2	0.4	39	25	0.641026	29	23	0.793103	12	8	0.666667	0	0	-
I	10820320	A-G	+	downstream	C35E7.6	73	3	0.0410959	22	2	0.0909091	32	3	0.09375	1	0	0	22	0	0	7	3	0.428571	46	1	0.0217391	35	3	0.0857143	13	1	0.0769231	0	0	-
I	10820321	A-G	+	downstream	C35E7.6	76	27	0.355263	28	9	0.321429	35	10	0.285714	3	1	0.333333	25	3	0.12	8	4	0.5	51	10	0.196078	42	20	0.47619	13	1	0.0769231	0	0	-
I	10820322	A-G	+	downstream	C35E7.6	79	30	0.379747	30	12	0.4	36	11	0.305556	4	1	0.25	25	3	0.12	9	5	0.555556	54	23	0.425926	46	27	0.586957	13	4	0.307692	0	0	-
I	10820323	A-G	+	downstream	C35E7.6	83	7	0.0843373	31	2	0.0645161	37	4	0.108108	4	0	0	25	1	0.04	9	0	0	53	13	0.245283	48	18	0.375	14	2	0.142857	0	0	-
I	10820331	A-G	+	downstream	C35E7.6	100	18	0.18	38	15	0.394737	49	5	0.102041	4	0	0	29	2	0.0689655	11	5	0.454545	63	8	0.126984	52	18	0.346154	16	2	0.125	0	0	-
I	10820332	A-G	+	downstream	C35E7.6	100	3	0.03	38	3	0.0789474	49	5	0.102041	4	0	0	29	1	0.0344828	11	2	0.181818	63	6	0.0952381	51	15	0.294118	15	0	0	0	0	-
I	10820333	A-G	+	downstream	C35E7.6	103	20	0.194175	39	13	0.333333	49	9	0.183673	4	0	0	29	2	0.0689655	12	4	0.333333	64	6	0.09375	53	17	0.320755	15	2	0.133333	0	0	-
I	10820348	A-G	+	downstream	C35E7.6	156	65	0.416667	59	22	0.372881	71	19	0.267606	8	2	0.25	29	9	0.310345	23	10	0.434783	91	17	0.186813	81	25	0.308642	16	3	0.1875	2	0	0
I	10820350	A-G	+	downstream	C35E7.6	167	108	0.646707	64	44	0.6875	80	43	0.5375	13	9	0.692308	31	14	0.451613	24	18	0.75	95	18	0.189474	85	28	0.329412	16	1	0.0625	3	0	0
I	10820353	A-G	+	downstream	C35E7.6	177	79	0.446328	67	42	0.626866	88	22	0.25	14	6	0.428571	32	11	0.34375	26	19	0.730769	100	16	0.16	104	33	0.317308	17	3	0.176471	3	0	0
I	10820357	A-G	+	downstream	C35E7.6	185	28	0.151351	72	23	0.319444	89	9	0.101124	13	3	0.230769	32	3	0.09375	25	11	0.44	104	7	0.0673077	107	4	0.0373832	19	2	0.105263	3	0	0
I	10820366	A-G	+	downstream	C35E7.6	204	50	0.245098	78	20	0.25641	95	28	0.294737	14	1	0.0714286	35	6	0.171429	30	9	0.3	108	36	0.333333	123	53	0.430894	33	13	0.393939	3	3	1
I	10820367	A-G	+	downstream	C35E7.6	206	83	0.402913	78	45	0.576923	96	37	0.385417	14	6	0.428571	36	13	0.361111	32	14	0.4375	109	39	0.357798	123	35	0.284553	32	10	0.3125	3	1	0.333333
I	10820374	A-G	+	downstream	C35E7.6	208	52	0.25	76	21	0.276316	96	16	0.166667	14	6	0.428571	38	2	0.0526316	32	13	0.40625	110	10	0.0909091	128	15	0.117188	34	2	0.0588235	3	0	0
I	10820375	A-G	+	downstream	C35E7.6	212	15	0.0707547	83	7	0.0843373	97	5	0.0515464	14	1	0.0714286	38	1	0.0263158	32	5	0.15625	112	4	0.0357143	130	11	0.0846154	35	1	0.0285714	3	1	0.333333
I	10820376	A-G	+	downstream	C35E7.6	214	19	0.088785	84	9	0.107143	97	6	0.0618557	15	2	0.133333	39	1	0.025641	32	8	0.25	112	3	0.0267857	130	5	0.0384615	35	0	0	3	0	0
I	10820378	A-G	+	downstream	C35E7.6	218	39	0.178899	81	16	0.197531	95	13	0.136842	15	0	0	38	6	0.157895	32	12	0.375	115	8	0.0695652	129	14	0.108527	35	0	0	3	0	0
I	10820393	A-G	+	downstream	C35E7.6	276	24	0.0869565	107	16	0.149533	116	6	0.0517241	24	3	0.125	49	3	0.0612245	37	4	0.108108	129	10	0.0775194	146	8	0.0547945	39	1	0.025641	5	2	0.4
I	10820395	A-G	+	downstream	C35E7.6	287	69	0.240418	117	44	0.376068	127	26	0.204724	25	7	0.28	51	10	0.196078	39	19	0.487179	134	36	0.268657	152	60	0.394737	40	9	0.225	4	3	0.75
I	10820401	A-G	+	downstream	C35E7.6	298	146	0.489933	122	70	0.57377	137	64	0.467153	32	14	0.4375	49	15	0.306122	49	34	0.693878	140	77	0.55	157	98	0.624204	48	28	0.583333	5	4	0.8
I	10820402	A-G	+	downstream	C35E7.6	296	111	0.375	121	49	0.404959	134	38	0.283582	32	14	0.4375	49	9	0.183673	50	22	0.44	139	60	0.431655	157	80	0.509554	47	23	0.489362	5	1	0.2
I	10820405	A-G	+	downstream	C35E7.6	302	31	0.102649	126	12	0.0952381	140	7	0.05	32	3	0.09375	47	6	0.12766	49	8	0.163265	141	8	0.0567376	157	11	0.0700637	48	3	0.0625	5	0	0
I	10820407	A-G	+	downstream	C35E7.6	303	256	0.844884	128	114	0.890625	140	115	0.821429	32	30	0.9375	46	34	0.73913	49	45	0.918367	141	80	0.567376	160	96	0.6	48	27	0.5625	5	2	0.4
I	10820408	A-G	+	downstream	C35E7.6	304	223	0.733553	124	89	0.717742	138	97	0.702899	32	25	0.78125	46	31	0.673913	50	37	0.74	140	60	0.428571	157	66	0.420382	48	22	0.458333	5	0	0
I	10820409	A-G	+	downstream	C35E7.6	306	18	0.0588235	129	2	0.0155039	138	8	0.057971	32	0	0	44	1	0.0227273	49	5	0.102041	139	1	0.00719424	156	0	0	48	1	0.0208333	5	0	0
I	10820416	A-G	+	downstream	C35E7.6	311	66	0.212219	135	46	0.340741	142	25	0.176056	32	8	0.25	47	9	0.191489	51	31	0.607843	143	5	0.034965	150	12	0.08	48	2	0.0416667	6	0	0
I	10820417	A-G	+	downstream	C35E7.6	311	201	0.646302	137	98	0.715328	145	93	0.641379	32	21	0.65625	50	33	0.66	52	42	0.807692	142	18	0.126761	151	43	0.284768	49	8	0.163265	6	2	0.333333
I	10820418	A-G	+	downstream	C35E7.6	311	80	0.257235	134	40	0.298507	143	27	0.188811	32	7	0.21875	50	16	0.32	52	30	0.576923	140	3	0.0214286	149	20	0.134228	46	7	0.152174	6	1	0.166667
I	10820419	A-G	+	downstream	C35E7.6	311	6	0.0192926	137	9	0.0656934	142	2	0.0140845	32	0	0	53	1	0.0188679	51	5	0.0980392	140	0	0	149	0	0	47	0	0	6	0	0
I	10820421	A-G	+	downstream	C35E7.6	299	0	0	133	1	0.0075188	143	1	0.00699301	32	0	0	51	0	0	51	4	0.0784314	135	0	0	146	0	0	47	1	0.0212766	6	0	0
I	10820423	A-G	+	downstream	C35E7.6	297	19	0.0639731	133	13	0.0977444	143	7	0.048951	32	2	0.0625	53	1	0.0188679	51	13	0.254902	133	1	0.0075188	150	7	0.0466667	47	0	0	6	0	0
I	10820425	A-G	+	downstream	C35E7.6	295	30	0.101695	133	26	0.195489	138	14	0.101449	32	2	0.0625	53	2	0.0377358	50	20	0.4	129	4	0.0310078	149	9	0.0604027	45	1	0.0222222	6	0	0
I	10820426	A-G	+	downstream	C35E7.6	287	3	0.010453	132	3	0.0227273	138	0	0	32	0	0	53	0	0	52	5	0.0961538	129	0	0	149	1	0.00671141	45	0	0	6	0	0
I	10820431	A-G	+	downstream	C35E7.6	281	6	0.0213523	127	5	0.0393701	130	1	0.00769231	32	0	0	48	1	0.0208333	51	3	0.0588235	124	1	0.00806452	154	2	0.012987	42	1	0.0238095	6	0	0
I	10820442	A-G	+	downstream	C35E7.6	291	46	0.158076	134	22	0.164179	134	16	0.119403	32	2	0.0625	54	6	0.111111	53	19	0.358491	139	6	0.0431655	129	9	0.0697674	45	1	0.0222222	6	0	0
I	10820444	A-G	+	downstream	C35E7.6	292	24	0.0821918	137	16	0.116788	139	14	0.100719	32	1	0.03125	54	3	0.0555556	53	8	0.150943	141	2	0.0141844	127	3	0.023622	45	2	0.0444444	6	0	0
I	10820450	A-G	+	downstream	C35E7.6	295	42	0.142373	140	36	0.257143	136	10	0.0735294	32	4	0.125	55	3	0.0545455	54	19	0.351852	148	4	0.027027	164	6	0.0365854	46	3	0.0652174	6	1	0.166667
I	10820451	A-G	+	downstream	C35E7.6	295	86	0.291525	138	55	0.398551	135	28	0.207407	32	14	0.4375	55	10	0.181818	54	33	0.611111	149	14	0.0939597	165	18	0.109091	46	6	0.130435	6	0	0
I	10820462	A-G	+	downstream	C35E7.6	298	49	0.16443	141	23	0.163121	137	20	0.145985	33	4	0.121212	54	10	0.185185	55	13	0.236364	156	8	0.0512821	190	22	0.115789	44	3	0.0681818	6	0	0
I	10820464	A-G	+	downstream	C35E7.6	302	139	0.460265	144	83	0.576389	139	61	0.438849	33	22	0.666667	53	15	0.283019	54	30	0.555556	159	12	0.0754717	199	34	0.170854	45	2	0.0444444	6	0	0
I	10820465	A-G	+	downstream	C35E7.6	306	267	0.872549	143	129	0.902098	136	117	0.860294	33	31	0.939394	54	41	0.759259	55	51	0.927273	158	80	0.506329	199	120	0.603015	45	24	0.533333	6	2	0.333333
I	10820466	A-G	+	downstream	C35E7.6	304	26	0.0855263	141	13	0.0921986	138	9	0.0652174	33	2	0.0606061	53	1	0.0188679	52	7	0.134615	159	20	0.125786	202	37	0.183168	47	11	0.234043	6	0	0
I	10820467	A-G	+	downstream	C35E7.6	302	67	0.221854	141	33	0.234043	138	16	0.115942	33	8	0.242424	51	5	0.0980392	51	18	0.352941	156	25	0.160256	204	62	0.303922	48	10	0.208333	6	2	0.333333
I	10820475	A-G	+	downstream	C35E7.6	304	236	0.776316	148	126	0.851351	139	108	0.776978	33	27	0.818182	50	36	0.72	60	57	0.95	159	70	0.440252	213	110	0.516432	52	21	0.403846	6	4	0.666667
I	10820480	A-G	+	downstream	C35E7.6	315	5	0.015873	152	5	0.0328947	141	5	0.035461	33	1	0.030303	50	0	0	56	4	0.0714286	165	0	0	221	7	0.0316742	55	0	0	8	0	0
I	10820488	A-G	+	downstream	C35E7.6	319	139	0.435737	147	60	0.408163	140	57	0.407143	32	15	0.46875	54	20	0.37037	59	36	0.610169	180	27	0.15	206	44	0.213592	57	6	0.105263	8	0	0
I	10820496	A-G	+	downstream	C35E7.6	335	5	0.0149254	154	7	0.0454545	143	3	0.020979	34	0	0	57	0	0	64	4	0.0625	192	4	0.0208333	230	20	0.0869565	57	2	0.0350877	10	1	0.1
I	10820497	A-G	+	downstream	C35E7.6	336	164	0.488095	154	86	0.558442	142	45	0.316901	33	18	0.545455	57	17	0.298246	63	37	0.587302	190	59	0.310526	230	116	0.504348	58	16	0.275862	10	5	0.5
I	10820499	A-G	+	downstream	C35E7.6	335	56	0.167164	157	29	0.184713	141	30	0.212766	34	5	0.147059	57	13	0.22807	61	13	0.213115	189	41	0.216931	239	50	0.209205	58	9	0.155172	11	0	0
I	10820505	A-G	+	downstream	C35E7.6	343	1	0.00291545	162	3	0.0185185	147	1	0.00680272	34	0	0	56	0	0	64	5	0.078125	205	2	0.0097561	254	6	0.023622	65	1	0.0153846	12	0	0
I	10820506	A-G	+	downstream	C35E7.6	342	10	0.0292398	161	13	0.0807453	147	5	0.0340136	34	1	0.0294118	56	0	0	63	10	0.15873	204	5	0.0245098	257	16	0.0622568	65	1	0.0153846	12	0	0
I	10820507	A-G	+	downstream	C35E7.6	341	17	0.0498534	162	35	0.216049	147	11	0.0748299	34	1	0.0294118	56	5	0.0892857	64	19	0.296875	203	4	0.0197044	261	16	0.0613027	66	4	0.0606061	12	1	0.0833333
I	10820508	A-G	+	downstream	C35E7.6	342	43	0.125731	162	39	0.240741	147	19	0.129252	34	6	0.176471	56	3	0.0535714	64	18	0.28125	206	3	0.0145631	262	18	0.0687023	66	3	0.0454545	12	0	0
I	10820522	A-G	+	downstream	C35E7.6	313	18	0.057508	148	21	0.141892	126	7	0.0555556	29	2	0.0689655	44	0	0	57	5	0.0877193	205	5	0.0243902	247	16	0.0647773	68	2	0.0294118	12	1	0.0833333
I	10871443	A-G	-	intron	Y37F4.6	0	0	-	2	2	1	1	1	1	0	0	-	0	0	-	0	0	-	0	0	-	1	1	1	0	0	-	0	0	-
I	10871444	A-G	-	intron	Y37F4.6	0	0	-	2	2	1	1	1	1	0	0	-	0	0	-	0	0	-	0	0	-	1	1	1	0	0	-	0	0	-
I	10871461	A-G	-	intron	Y37F4.6	0	0	-	1	1	1	1	1	1	0	0	-	0	0	-	0	0	-	0	0	-	1	1	1	0	0	-	0	0	-
I	10871465	A-G	-	intron	Y37F4.6	0	0	-	1	1	1	1	1	1	0	0	-	0	0	-	0	0	-	0	0	-	1	1	1	0	0	-	0	0	-
I	10871483	A-G	-	intron	Y37F4.6	0	0	-	1	1	1	1	1	1	0	0	-	0	0	-	0	0	-	0	0	-	0	0	-	0	0	-	0	0	-
I	10871487	A-G	-	intron	Y37F4.6	0	0	-	1	1	1	1	1	1	0	0	-	0	0	-	0	0	-	0	0	-	0	0	-	0	0	-	0	0	-
I	10871493	A-G	-	intron	Y37F4.6	0	0	-	1	1	1	1	1	1	0	0	-	0	0	-	0	0	-	0	0	-	0	0	-	0	0	-	0	0	-
I	10939332	A-G	+	intron	F49D11.1	0	0	-	3	3	1	0	0	-	0	0	-	0	0	-	0	0	-	0	0	-	2	1	0.5	0	0	-	0	0	-
I	10939333	A-G	+	intron	F49D11.1	0	0	-	3	2	0.666667	0	0	-	0	0	-	0	0	-	0	0	-	0	0	-	2	1	0.5	0	0	-	0	0	-
I	10939347	A-G	+	intron	F49D11.1	0	0	-	3	2	0.666667	0	0	-	0	0	-	0	0	-	2	1	0.5	0	0	-	2	1	0.5	0	0	-	0	0	-
I	10939348	A-G	+	intron	F49D11.1	0	0	-	4	3	0.75	0	0	-	0	0	-	0	0	-	2	0	0	0	0	-	2	1	0.5	0	0	-	0	0	-
I	10939352	A-G	+	intron	F49D11.1	0	0	-	4	3	0.75	0	0	-	0	0	-	0	0	-	2	2	1	0	0	-	2	1	0.5	1	1	1	0	0	-
I	10939364	A-G	+	intron	F49D11.1	0	0	-	4	4	1	0	0	-	0	0	-	0	0	-	2	2	1	0	0	-	2	2	1	1	0	0	0	0	-
I	10939369	A-G	+	intron	F49D11.1	0	0	-	4	3	0.75	0	0	-	0	0	-	0	0	-	2	0	0	0	0	-	2	1	0.5	1	1	1	0	0	-
I	10939378	A-G	+	intron	F49D11.1	0	0	-	4	4	1	0	0	-	0	0	-	0	0	-	2	2	1	0	0	-	2	2	1	1	1	1	0	0	-
I	10939379	A-G	+	intron	F49D11.1	0	0	-	4	2	0.5	0	0	-	0	0	-	0	0	-	2	0	0	0	0	-	2	0	0	1	0	0	0	0	-
I	10939385	A-G	+	intron	F49D11.1	0	0	-	4	3	0.75	0	0	-	0	0	-	0	0	-	2	1	0.5	0	0	-	1	0	0	1	0	0	0	0	-
I	10939390	A-G	+	intron	F49D11.1	0	0	-	4	4	1	0	0	-	0	0	-	0	0	-	2	1	0.5	0	0	-	2	2	1	1	0	0	0	0	-
I	10939400	A-G	+	intron	F49D11.1	0	0	-	4	4	1	0	0	-	0	0	-	0	0	-	2	2	1	0	0	-	2	0	0	1	0	0	0	0	-
I	10939403	A-G	+	intron	F49D11.1	0	0	-	4	1	0.25	0	0	-	0	0	-	0	0	-	2	1	0.5	0	0	-	2	0	0	1	0	0	0	0	-
I	10944756	A-G	+	intron	Y95D11A.1	0	0	-	1	1	1	0	0	-	0	0	-	1	1	1	2	2	1	0	0	-	0	0	-	0	0	-	0	0	-
I	10945109	A-G	+	intron	Y95D11A.1	2	0	0	6	2	0.333333	0	0	-	0	0	-	0	0	-	0	0	-	1	0	0	0	0	-	0	0	-	0	0	-
I	10945120	A-G	+	intron	Y95D11A.1	2	1	0.5	7	4	0.571429	0	0	-	0	0	-	0	0	-	0	0	-	1	0	0	0	0	-	0	0	-	0	0	-
I	10945121	A-G	+	intron	Y95D11A.1	2	0	0	7	2	0.285714	0	0	-	0	0	-	0	0	-	0	0	-	1	0	0	0	0	-	0	0	-	0	0	-
I	10945130	A-G	+	intron	Y95D11A.1	2	0	0	7	2	0.285714	1	0	0	0	0	-	0	0	-	0	0	-	1	0	0	0	0	-	0	0	-	0	0	-
I	10979866	A-G	-	3UTR/intron	Y52B11A.4	36	3	0.0833333	11	0	0	11	0	0	2	0	0	1	0	0	0	0	-	28	1	0.0357143	91	8	0.0879121	5	1	0.2	0	0	-
I	11011466	A-G	+	upstream	Y52B11A.12	0	0	-	0	0	-	4	2	0.5	0	0	-	0	0	-	0	0	-	0	0	-	0	0	-	2	0	0	0	0	-
I	11011467	A-G	+	upstream	Y52B11A.12	0	0	-	0	0	-	4	2	0.5	0	0	-	0	0	-	0	0	-	0	0	-	0	0	-	2	0	0	0	0	-
I	11011468	A-G	+	upstream	Y52B11A.12	0	0	-	0	0	-	4	2	0.5	0	0	-	0	0	-	0	0	-	0	0	-	0	0	-	2	0	0	0	0	-
I	11011472	A-G	+	upstream	Y52B11A.12	0	0	-	0	0	-	4	2	0.5	0	0	-	0	0	-	0	0	-	0	0	-	0	0	-	2	0	0	0	0	-
I	11011478	A-G	+	upstream	Y52B11A.12	0	0	-	0	0	-	4	2	0.5	0	0	-	0	0	-	0	0	-	0	0	-	0	0	-	2	0	0	0	0	-
I	11011486	A-G	+	upstream	Y52B11A.12	0	0	-	0	0	-	4	2	0.5	0	0	-	0	0	-	0	0	-	0	0	-	1	0	0	2	0	0	0	0	-
I	11011489	A-G	+	upstream	Y52B11A.12	0	0	-	0	0	-	4	2	0.5	0	0	-	0	0	-	0	0	-	0	0	-	1	0	0	2	0	0	0	0	-
I	11011522	A-G	+	upstream	Y52B11A.12	0	0	-	0	0	-	6	2	0.333333	0	0	-	0	0	-	0	0	-	0	0	-	2	1	0.5	1	0	0	0	0	-
I	11012069	A-G	+	upstream	Y52B11A.12	0	0	-	1	1	1	1	1	1	0	0	-	0	0	-	0	0	-	0	0	-	0	0	-	0	0	-	0	0	-
I	11012070	A-G	-	intron/noncoding	Y52B11A.13	5	0	0	0	0	-	0	0	-	0	0	-	0	0	-	12	0	0	5	1	0.2	7	1	0.142857	0	0	-	0	0	-
I	11012074	A-G	+	upstream	Y52B11A.12	0	0	-	1	1	1	1	1	1	0	0	-	0	0	-	0	0	-	0	0	-	0	0	-	0	0	-	0	0	-
I	11012081	A-G	-	intron/noncoding	Y52B11A.13	6	2	0.333333	0	0	-	0	0	-	0	0	-	0	0	-	8	0	0	4	1	0.25	4	3	0.75	0	0	-	0	0	-
I	11012190	A-G	-	intron/noncoding	Y52B11A.13	4	1	0.25	3	1	0.333333	0	0	-	0	0	-	0	0	-	6	0	0	8	0	0	8	0	0	0	0	-	0	0	-
I	11012304	A-G	-	intron/noncoding	Y52B11A.13	3	0	0	2	1	0.5	0	0	-	0	0	-	0	0	-	3	0	0	6	2	0.333333	4	0	0	0	0	-	0	0	-
I	11012354	A-G	-	intron/noncoding	Y52B11A.13	3	0	0	3	2	0.666667	0	0	-	0	0	-	0	0	-	5	0	0	7	0	0	2	0	0	0	0	-	0	0	-
I	11012356	A-G	-	intron/noncoding	Y52B11A.13	3	0	0	3	2	0.666667	0	0	-	0	0	-	0	0	-	5	0	0	7	0	0	2	0	0	0	0	-	0	0	-
I	11012358	A-G	+	upstream	Y52B11A.12	0	0	-	0	0	-	2	2	1	0	0	-	0	0	-	0	0	-	0	0	-	0	0	-	0	0	-	0	0	-
I	11012361	A-G	-	intron/noncoding	Y52B11A.13	3	0	0	3	2	0.666667	0	0	-	0	0	-	0	0	-	4	0	0	7	0	0	2	0	0	0	0	-	0	0	-
I	11012373	A-G	-	intron/noncoding	Y52B11A.13	3	0	0	3	2	0.666667	0	0	-	0	0	-	0	0	-	5	0	0	7	0	0	0	0	-	0	0	-	0	0	-
I	11012445	A-G	-	intron/noncoding	Y52B11A.13	3	0	0	3	2	0.666667	0	0	-	0	0	-	0	0	-	3	0	0	4	0	0	1	0	0	0	0	-	0	0	-
I	11012446	A-G	-	intron/noncoding	Y52B11A.13	3	0	0	3	2	0.666667	0	0	-	0	0	-	0	0	-	3	0	0	4	0	0	1	0	0	0	0	-	0	0	-
I	11012755	A-G	-	intron/noncoding	Y52B11A.13	2	1	0.5	0	0	-	0	0	-	0	0	-	3	2	0.666667	3	0	0	5	0	0	5	2	0.4	0	0	-	0	0	-
I	11012771	A-G	-	intron/noncoding	Y52B11A.13	2	1	0.5	0	0	-	0	0	-	0	0	-	3	1	0.333333	4	0	0	5	0	0	5	1	0.2	0	0	-	0	0	-
I	11012793	A-G	-	intron/noncoding	Y52B11A.13	2	0	0	1	1	1	0	0	-	0	0	-	2	1	0.5	4	0	0	4	0	0	5	0	0	0	0	-	0	0	-
I	11012798	A-G	-	intron/noncoding	Y52B11A.13	2	1	0.5	1	1	1	0	0	-	0	0	-	1	1	1	4	0	0	3	3	1	5	1	0.2	0	0	-	0	0	-
I	11013045	A-G	+	CDS/noncoding	Y52B11A.12	23	0	0	2	2	1	4	4	1	0	0	-	1	0	0	9	0	0	27	0	0	5	0	0	2	2	1	0	0	-
I	11013051	A-G	+	CDS/noncoding	Y52B11A.12	23	0	0	1	1	1	4	1	0.25	0	0	-	1	0	0	10	0	0	27	0	0	5	0	0	2	0	0	0	0	-
I	11013067	A-G	+	CDS/noncoding	Y52B11A.12	25	0	0	3	0	0	3	2	0.666667	0	0	-	1	0	0	13	0	0	28	0	0	5	0	0	2	1	0.5	0	0	-
I	11013075	A-G	+	CDS/noncoding	Y52B11A.12	29	0	0	3	2	0.666667	3	1	0.333333	0	0	-	1	0	0	15	0	0	32	0	0	5	0	0	2	0	0	0	0	-
I	11013150	A-G	+	CDS/noncoding	Y52B11A.12	25	0	0	3	2	0.666667	1	1	1	0	0	-	0	0	-	13	0	0	18	0	0	1	0	0	1	0	0	0	0	-
I	11013456	A-G	+	CDS/noncoding	Y52B11A.12	10	0	0	1	0	0	2	2	1	0	0	-	0	0	-	4	0	0	8	0	0	0	0	-	0	0	-	0	0	-
I	11013614	A-G	-	intron/noncoding	null	2	0	0	3	0	0	0	0	-	2	1	0.5	2	1	0.5	1	0	0	2	0	0	2	0	0	1	0	0	0	0	-
I	11013661	A-G	-	intron/noncoding	null	3	1	0.333333	5	0	0	0	0	-	5	0	0	2	1	0.5	1	0	0	3	0	0	3	0	0	1	0	0	0	0	-
I	11013662	A-G	-	intron/noncoding	null	3	1	0.333333	5	0	0	0	0	-	5	1	0.2	2	1	0.5	1	0	0	3	1	0.333333	4	1	0.25	1	0	0	0	0	-
I	11013747	A-G	-	intron/noncoding	null	3	2	0.666667	7	1	0.142857	0	0	-	4	1	0.25	2	1	0.5	1	0	0	1	0	0	3	1	0.333333	1	0	0	0	0	-
I	11035932	A-G	-	intron	Y52B11A.9	0	0	-	1	1	1	1	1	1	0	0	-	0	0	-	0	0	-	0	0	-	0	0	-	1	0	0	0	0	-
I	11035940	A-G	-	intron	Y52B11A.9	0	0	-	1	1	1	1	1	1	0	0	-	0	0	-	0	0	-	0	0	-	0	0	-	0	0	-	0	0	-
I	11035941	A-G	-	intron	Y52B11A.9	0	0	-	1	1	1	1	1	1	0	0	-	0	0	-	0	0	-	0	0	-	0	0	-	0	0	-	0	0	-
I	11035971	A-G	-	intron	Y52B11A.9	0	0	-	1	1	1	1	1	1	0	0	-	0	0	-	0	0	-	0	0	-	0	0	-	1	1	1	0	0	-
I	11057054	A-G	-	integenic	-	0	0	-	0	0	-	0	0	-	0	0	-	0	0	-	2	1	0.5	0	0	-	1	0	0	1	1	1	2	1	0.5
I	11057056	A-G	-	integenic	-	0	0	-	0	0	-	0	0	-	0	0	-	0	0	-	3	3	1	0	0	-	1	1	1	1	1	1	2	2	1
I	11057057	A-G	-	integenic	-	0	0	-	0	0	-	0	0	-	0	0	-	0	0	-	3	2	0.666667	0	0	-	1	1	1	1	1	1	2	2	1
I	11057088	A-G	-	integenic	-	0	0	-	0	0	-	0	0	-	0	0	-	0	0	-	3	2	0.666667	0	0	-	0	0	-	1	1	1	1	1	1
I	11057093	A-G	-	integenic	-	0	0	-	0	0	-	0	0	-	0	0	-	0	0	-	3	3	1	0	0	-	0	0	-	1	1	1	1	1	1
I	11057109	A-G	-	integenic	-	0	0	-	0	0	-	0	0	-	0	0	-	0	0	-	3	3	1	0	0	-	1	1	1	1	1	1	1	1	1
I	11057114	A-G	-	integenic	-	0	0	-	0	0	-	0	0	-	0	0	-	0	0	-	2	2	1	0	0	-	0	0	-	1	0	0	1	1	1
I	11057144	A-G	-	integenic	-	0	0	-	0	0	-	0	0	-	0	0	-	0	0	-	2	0	0	0	0	-	1	0	0	1	1	1	1	1	1
I	11083215	A-G	-	intron	W02B9.1	0	0	-	2	2	1	0	0	-	0	0	-	0	0	-	0	0	-	1	1	1	0	0	-	0	0	-	0	0	-
I	11083222	A-G	-	intron	W02B9.1	0	0	-	2	2	1	0	0	-	0	0	-	0	0	-	0	0	-	1	1	1	0	0	-	0	0	-	0	0	-
I	11083234	A-G	-	intron	W02B9.1	0	0	-	2	2	1	0	0	-	0	0	-	0	0	-	0	0	-	1	1	1	0	0	-	0	0	-	0	0	-
I	11083235	A-G	-	intron	W02B9.1	0	0	-	2	2	1	0	0	-	0	0	-	0	0	-	0	0	-	1	1	1	0	0	-	0	0	-	0	0	-
I	11083258	A-G	-	intron	W02B9.1	0	0	-	2	2	1	0	0	-	0	0	-	0	0	-	0	0	-	1	1	1	0	0	-	0	0	-	0	0	-
I	11165615	A-G	-	intron	Y52B11C.1	1	0	0	3	2	0.666667	0	0	-	0	0	-	1	0	0	0	0	-	0	0	-	2	2	1	0	0	-	0	0	-
I	11165620	A-G	-	intron	Y52B11C.1	1	1	1	3	3	1	0	0	-	0	0	-	1	0	0	0	0	-	0	0	-	1	1	1	0	0	-	0	0	-
I	11165621	A-G	-	intron	Y52B11C.1	0	0	-	3	3	1	0	0	-	0	0	-	1	0	0	0	0	-	0	0	-	1	1	1	0	0	-	0	0	-
I	11165630	A-G	-	intron	Y52B11C.1	0	0	-	3	3	1	0	0	-	0	0	-	1	0	0	0	0	-	0	0	-	1	1	1	0	0	-	0	0	-
I	11165637	A-G	-	intron	Y52B11C.1	0	0	-	3	2	0.666667	0	0	-	0	0	-	1	0	0	0	0	-	0	0	-	1	1	1	0	0	-	0	0	-
I	11165645	A-G	-	intron	Y52B11C.1	0	0	-	3	3	1	0	0	-	0	0	-	1	0	0	0	0	-	0	0	-	1	1	1	0	0	-	0	0	-
I	11165662	A-G	-	intron	Y52B11C.1	0	0	-	3	3	1	0	0	-	0	0	-	1	1	1	0	0	-	0	0	-	1	1	1	0	0	-	0	0	-
I	11170081	A-G	-	intron	F28D9.1;F28D9.4;Y52B11C.1	0	0	-	1	1	1	2	2	1	0	0	-	0	0	-	0	0	-	0	0	-	2	2	1	0	0	-	1	0	0
I	11170091	A-G	-	intron	F28D9.1;F28D9.4;Y52B11C.1	1	1	1	3	2	0.666667	2	2	1	0	0	-	1	1	1	0	0	-	0	0	-	3	3	1	1	1	1	1	0	0
I	11170092	A-G	+	antisense	F28D9.1;F28D9.4;Y52B11C.1	7	3	0.428571	4	4	1	1	0	0	0	0	-	1	1	1	0	0	-	3	2	0.666667	0	0	-	0	0	-	0	0	-
I	11170100	A-G	-	intron	F28D9.1;F28D9.4;Y52B11C.1	1	1	1	3	2	0.666667	2	2	1	0	0	-	1	0	0	0	0	-	0	0	-	3	1	0.333333	1	1	1	1	0	0
I	11170102	A-G	+	antisense	F28D9.1;F28D9.4;Y52B11C.1	7	1	0.142857	4	1	0.25	1	0	0	0	0	-	1	1	1	0	0	-	3	0	0	0	0	-	0	0	-	0	0	-
I	11170103	A-G	-	intron	F28D9.1;F28D9.4;Y52B11C.1	1	0	0	3	1	0.333333	2	1	0.5	0	0	-	1	0	0	0	0	-	0	0	-	3	0	0	1	0	0	1	0	0
I	11170104	A-G	-	intron	F28D9.1;F28D9.4;Y52B11C.1	1	0	0	3	1	0.333333	2	2	1	0	0	-	1	1	1	0	0	-	0	0	-	3	0	0	1	0	0	1	0	0
I	11170105	A-G	-	intron	F28D9.1;F28D9.4;Y52B11C.1	1	0	0	3	1	0.333333	2	0	0	0	0	-	1	1	1	0	0	-	0	0	-	3	2	0.666667	1	0	0	1	0	0
I	11170112	A-G	-	intron	F28D9.1;F28D9.4;Y52B11C.1	1	0	0	2	1	0.5	2	1	0.5	0	0	-	1	0	0	0	0	-	0	0	-	3	1	0.333333	1	1	1	1	0	0
I	11170113	A-G	-	intron	F28D9.1;F28D9.4;Y52B11C.1	1	1	1	2	2	1	2	2	1	0	0	-	1	1	1	0	0	-	0	0	-	3	3	1	1	1	1	1	1	1
I	11170114	A-G	-	intron	F28D9.1;F28D9.4;Y52B11C.1	1	1	1	2	2	1	2	2	1	0	0	-	1	1	1	0	0	-	0	0	-	2	1	0.5	1	1	1	1	0	0
I	11170116	A-G	-	intron	F28D9.1;F28D9.4;Y52B11C.1	1	1	1	2	2	1	2	2	1	0	0	-	1	1	1	0	0	-	0	0	-	3	2	0.666667	1	0	0	1	0	0
I	11170125	A-G	-	intron	F28D9.1;F28D9.4;Y52B11C.1	1	0	0	2	2	1	2	2	1	0	0	-	1	0	0	0	0	-	0	0	-	2	1	0.5	1	0	0	1	0	0
I	11170126	A-G	-	intron	F28D9.1;F28D9.4;Y52B11C.1	1	1	1	2	2	1	2	2	1	0	0	-	1	1	1	0	0	-	0	0	-	1	1	1	1	1	1	1	0	0
I	11170127	A-G	+	antisense	F28D9.1;F28D9.4;Y52B11C.1	4	3	0.75	2	2	1	1	1	1	0	0	-	1	1	1	0	0	-	2	2	1	0	0	-	0	0	-	0	0	-
I	11170130	A-G	+	antisense	F28D9.1;F28D9.4;Y52B11C.1	5	4	0.8	2	2	1	1	0	0	0	0	-	1	1	1	0	0	-	2	1	0.5	0	0	-	0	0	-	0	0	-
I	11170136	A-G	-	intron	F28D9.1;F28D9.4;Y52B11C.1	1	0	0	2	2	1	2	2	1	0	0	-	1	0	0	0	0	-	0	0	-	2	0	0	1	0	0	1	0	0
I	11170139	A-G	-	intron	F28D9.1;F28D9.4;Y52B11C.1	1	1	1	2	2	1	2	2	1	0	0	-	1	1	1	0	0	-	0	0	-	2	2	1	1	1	1	1	1	1
I	11170140	A-G	+	antisense	F28D9.1;F28D9.4;Y52B11C.1	5	3	0.6	2	2	1	1	1	1	0	0	-	1	0	0	0	0	-	2	2	1	0	0	-	0	0	-	0	0	-
I	11170141	A-G	+	antisense	F28D9.1;F28D9.4;Y52B11C.1	5	4	0.8	2	2	1	1	1	1	0	0	-	1	1	1	0	0	-	2	1	0.5	0	0	-	0	0	-	0	0	-
I	11170147	A-G	-	intron	F28D9.1;F28D9.4;Y52B11C.1	1	0	0	2	1	0.5	2	1	0.5	0	0	-	1	1	1	0	0	-	0	0	-	2	1	0.5	1	0	0	0	0	-
I	11170152	A-G	-	intron	F28D9.1;F28D9.4;Y52B11C.1	1	1	1	2	2	1	2	2	1	0	0	-	1	1	1	0	0	-	0	0	-	2	2	1	1	0	0	1	0	0
I	11170180	A-G	+	antisense	F28D9.1;F28D9.4;Y52B11C.1	4	3	0.75	1	0	0	1	1	1	0	0	-	1	1	1	0	0	-	2	2	1	2	1	0.5	0	0	-	0	0	-
I	11170181	A-G	+	antisense	F28D9.1;F28D9.4;Y52B11C.1	4	1	0.25	1	0	0	1	1	1	0	0	-	1	1	1	0	0	-	2	2	1	2	1	0.5	0	0	-	0	0	-
I	11170184	A-G	-	intron	F28D9.1;F28D9.4;Y52B11C.1	1	0	0	2	1	0.5	2	1	0.5	0	0	-	0	0	-	1	0	0	0	0	-	3	0	0	1	1	1	1	0	0
I	11170185	A-G	-	intron	F28D9.1;F28D9.4;Y52B11C.1	1	0	0	2	2	1	2	1	0.5	0	0	-	0	0	-	1	0	0	0	0	-	3	1	0.333333	1	0	0	1	0	0
I	11170189	A-G	-	intron	F28D9.1;F28D9.4;Y52B11C.1	1	0	0	2	1	0.5	2	1	0.5	0	0	-	0	0	-	1	0	0	0	0	-	3	0	0	1	0	0	1	0	0
I	11170191	A-G	+	antisense	F28D9.1;F28D9.4;Y52B11C.1	4	1	0.25	1	0	0	1	0	0	0	0	-	1	0	0	0	0	-	2	1	0.5	2	2	1	0	0	-	0	0	-
I	11170192	A-G	+	antisense	F28D9.1;F28D9.4;Y52B11C.1	4	0	0	1	0	0	1	0	0	0	0	-	1	0	0	0	0	-	2	2	1	2	1	0.5	0	0	-	0	0	-
I	11170193	A-G	+	antisense	F28D9.1;F28D9.4;Y52B11C.1	4	1	0.25	1	1	1	1	0	0	0	0	-	1	0	0	0	0	-	2	1	0.5	2	2	1	0	0	-	0	0	-
I	11170195	A-G	+	antisense	F28D9.1;F28D9.4;Y52B11C.1	4	1	0.25	1	0	0	1	0	0	0	0	-	1	0	0	0	0	-	2	1	0.5	2	1	0.5	0	0	-	0	0	-
I	11170196	A-G	+	antisense	F28D9.1;F28D9.4;Y52B11C.1	4	3	0.75	1	1	1	1	1	1	0	0	-	1	1	1	0	0	-	2	1	0.5	2	2	1	0	0	-	0	0	-
I	11170203	A-G	+	antisense	F28D9.1;F28D9.4;Y52B11C.1	4	3	0.75	1	1	1	1	1	1	0	0	-	1	1	1	0	0	-	2	1	0.5	2	2	1	0	0	-	0	0	-
I	11170207	A-G	-	intron	F28D9.1;F28D9.4;Y52B11C.1	1	0	0	2	1	0.5	2	0	0	0	0	-	1	1	1	1	0	0	0	0	-	2	1	0.5	1	0	0	1	0	0
I	11170209	A-G	+	antisense	F28D9.1;F28D9.4;Y52B11C.1	4	2	0.5	1	1	1	1	1	1	0	0	-	1	1	1	0	0	-	2	1	0.5	2	2	1	0	0	-	0	0	-
I	11170216	A-G	-	intron	F28D9.1;F28D9.4;Y52B11C.1	1	1	1	2	2	1	1	1	1	0	0	-	1	1	1	1	1	1	0	0	-	2	2	1	1	1	1	1	0	0
I	11170217	A-G	+	antisense	F28D9.1;F28D9.4;Y52B11C.1	4	3	0.75	1	1	1	1	1	1	0	0	-	1	1	1	0	0	-	2	2	1	2	2	1	0	0	-	0	0	-
I	11170225	A-G	+	antisense	F28D9.1;F28D9.4;Y52B11C.1	4	1	0.25	1	0	0	1	0	0	0	0	-	1	0	0	0	0	-	2	1	0.5	2	1	0.5	0	0	-	0	0	-
I	11170226	A-G	+	antisense	F28D9.1;F28D9.4;Y52B11C.1	4	0	0	1	0	0	1	0	0	0	0	-	1	0	0	0	0	-	2	2	1	2	2	1	0	0	-	0	0	-
I	11170230	A-G	-	intron	F28D9.1;F28D9.4;Y52B11C.1	1	1	1	2	1	0.5	0	0	-	0	0	-	1	1	1	1	0	0	0	0	-	2	0	0	1	0	0	1	0	0
I	11170232	A-G	-	intron	F28D9.1;F28D9.4;Y52B11C.1	1	1	1	2	2	1	0	0	-	0	0	-	1	1	1	0	0	-	0	0	-	2	2	1	1	1	1	1	1	1
I	11170233	A-G	+	antisense	F28D9.1;F28D9.4;Y52B11C.1	4	1	0.25	1	1	1	1	0	0	0	0	-	1	1	1	0	0	-	2	0	0	2	2	1	0	0	-	0	0	-
I	11170234	A-G	+	antisense	F28D9.1;F28D9.4;Y52B11C.1	4	2	0.5	1	1	1	1	1	1	0	0	-	1	1	1	0	0	-	2	1	0.5	2	1	0.5	0	0	-	0	0	-
I	11170249	A-G	-	intron	F28D9.1;F28D9.4;Y52B11C.1	1	1	1	2	2	1	0	0	-	0	0	-	1	1	1	1	0	0	0	0	-	2	2	1	1	0	0	1	0	0
I	11170250	A-G	-	intron	F28D9.1;F28D9.4;Y52B11C.1	1	0	0	2	1	0.5	0	0	-	0	0	-	1	1	1	1	0	0	0	0	-	2	0	0	1	0	0	1	0	0
I	11170252	A-G	-	intron	F28D9.1;F28D9.4;Y52B11C.1	1	1	1	2	2	1	0	0	-	0	0	-	1	0	0	1	1	1	0	0	-	2	0	0	1	1	1	0	0	-
I	11170253	A-G	+	antisense	F28D9.1;F28D9.4;Y52B11C.1	5	2	0.4	1	1	1	1	0	0	0	0	-	1	0	0	0	0	-	2	2	1	0	0	-	0	0	-	0	0	-
I	11170264	A-G	-	intron	F28D9.1;F28D9.4;Y52B11C.1	0	0	-	0	0	-	0	0	-	0	0	-	1	1	1	2	1	0.5	0	0	-	1	0	0	0	0	-	0	0	-
I	11170271	A-G	-	intron	F28D9.1;F28D9.4;Y52B11C.1	0	0	-	0	0	-	0	0	-	0	0	-	1	1	1	2	2	1	0	0	-	1	1	1	0	0	-	0	0	-
I	11170276	A-G	-	intron	F28D9.1;F28D9.4;Y52B11C.1	0	0	-	0	0	-	0	0	-	0	0	-	1	1	1	1	1	1	0	0	-	0	0	-	0	0	-	0	0	-
I	11170277	A-G	-	intron	F28D9.1;F28D9.4;Y52B11C.1	0	0	-	0	0	-	0	0	-	0	0	-	1	1	1	2	1	0.5	0	0	-	0	0	-	0	0	-	0	0	-
I	11170283	A-G	-	intron	F28D9.1;F28D9.4;Y52B11C.1	0	0	-	0	0	-	0	0	-	0	0	-	1	1	1	2	2	1	0	0	-	0	0	-	0	0	-	0	0	-
I	11170285	A-G	+	antisense	F28D9.1;F28D9.4;Y52B11C.1	3	2	0.666667	0	0	-	0	0	-	0	0	-	0	0	-	0	0	-	2	2	1	2	2	1	0	0	-	0	0	-
I	11170287	A-G	+	antisense	F28D9.1;F28D9.4;Y52B11C.1	3	2	0.666667	0	0	-	0	0	-	0	0	-	0	0	-	0	0	-	2	1	0.5	2	2	1	0	0	-	0	0	-
I	11170288	A-G	+	antisense	F28D9.1;F28D9.4;Y52B11C.1	3	2	0.666667	0	0	-	0	0	-	0	0	-	0	0	-	0	0	-	2	2	1	2	2	1	0	0	-	0	0	-
I	11170312	A-G	+	antisense	F28D9.1;F28D9.4;Y52B11C.1	3	1	0.333333	0	0	-	0	0	-	0	0	-	0	0	-	0	0	-	2	1	0.5	2	1	0.5	0	0	-	0	0	-
I	11170313	A-G	+	antisense	F28D9.1;F28D9.4;Y52B11C.1	3	1	0.333333	0	0	-	0	0	-	0	0	-	0	0	-	0	0	-	2	1	0.5	2	2	1	0	0	-	0	0	-
I	11170334	A-G	+	antisense	F28D9.1;F28D9.4;Y52B11C.1	2	1	0.5	0	0	-	0	0	-	0	0	-	0	0	-	0	0	-	2	2	1	2	2	1	0	0	-	0	0	-
I	11170335	A-G	+	antisense	F28D9.1;F28D9.4;Y52B11C.1	2	2	1	0	0	-	0	0	-	0	0	-	0	0	-	0	0	-	2	2	1	2	2	1	0	0	-	0	0	-
I	11170340	A-G	+	antisense	F28D9.1;F28D9.4;Y52B11C.1	2	2	1	0	0	-	0	0	-	0	0	-	0	0	-	0	0	-	2	2	1	2	2	1	0	0	-	0	0	-
I	11170341	A-G	+	antisense	F28D9.1;F28D9.4;Y52B11C.1	2	2	1	0	0	-	0	0	-	0	0	-	0	0	-	0	0	-	2	2	1	2	2	1	0	0	-	0	0	-
I	11170362	A-G	+	antisense	F28D9.1;F28D9.4;Y52B11C.1	2	2	1	0	0	-	0	0	-	0	0	-	0	0	-	0	0	-	1	1	1	0	0	-	0	0	-	0	0	-
I	11170374	A-G	+	antisense	F28D9.1;F28D9.4;Y52B11C.1	2	2	1	0	0	-	0	0	-	0	0	-	0	0	-	0	0	-	0	0	-	0	0	-	0	0	-	0	0	-
I	11170375	A-G	+	antisense	F28D9.1;F28D9.4;Y52B11C.1	3	2	0.666667	0	0	-	0	0	-	0	0	-	0	0	-	0	0	-	0	0	-	0	0	-	0	0	-	0	0	-
I	11170384	A-G	+	antisense	F28D9.1;F28D9.4;Y52B11C.1	5	5	1	0	0	-	0	0	-	0	0	-	0	0	-	0	0	-	1	0	0	0	0	-	0	0	-	0	0	-
I	11170400	A-G	+	antisense	F28D9.1;F28D9.4;Y52B11C.1	5	2	0.4	0	0	-	0	0	-	0	0	-	0	0	-	1	1	1	1	0	0	0	0	-	0	0	-	0	0	-
I	11170409	A-G	+	antisense	F28D9.1;F28D9.4;Y52B11C.1	6	3	0.5	0	0	-	0	0	-	0	0	-	0	0	-	1	0	0	1	0	0	0	0	-	0	0	-	0	0	-
I	11170410	A-G	+	antisense	F28D9.1;F28D9.4;Y52B11C.1	6	6	1	0	0	-	0	0	-	0	0	-	0	0	-	1	0	0	1	1	1	0	0	-	0	0	-	0	0	-
I	11170429	A-G	+	antisense	F28D9.1;F28D9.4;Y52B11C.1	5	2	0.4	0	0	-	0	0	-	0	0	-	0	0	-	1	1	1	1	0	0	0	0	-	0	0	-	0	0	-
I	11170430	A-G	+	antisense	F28D9.1;F28D9.4;Y52B11C.1	5	5	1	0	0	-	0	0	-	0	0	-	0	0	-	1	1	1	1	1	1	0	0	-	0	0	-	0	0	-
I	11170435	A-G	+	antisense	F28D9.1;F28D9.4;Y52B11C.1	5	5	1	0	0	-	0	0	-	0	0	-	0	0	-	1	1	1	1	0	0	0	0	-	0	0	-	0	0	-
I	11170440	A-G	+	antisense	F28D9.1;F28D9.4;Y52B11C.1	5	5	1	0	0	-	0	0	-	0	0	-	0	0	-	1	1	1	1	1	1	0	0	-	0	0	-	0	0	-
I	11170442	A-G	+	antisense	F28D9.1;F28D9.4;Y52B11C.1	5	2	0.4	0	0	-	0	0	-	0	0	-	0	0	-	1	1	1	1	0	0	0	0	-	0	0	-	0	0	-
I	11170462	A-G	+	antisense	F28D9.1;F28D9.4;Y52B11C.1	6	3	0.5	0	0	-	0	0	-	0	0	-	0	0	-	1	1	1	1	0	0	0	0	-	0	0	-	0	0	-
I	11170469	A-G	+	antisense	F28D9.1;F28D9.4;Y52B11C.1	5	3	0.6	0	0	-	0	0	-	0	0	-	0	0	-	1	1	1	1	1	1	0	0	-	0	0	-	0	0	-
I	11170470	A-G	+	antisense	F28D9.1;F28D9.4;Y52B11C.1	5	1	0.2	0	0	-	0	0	-	0	0	-	0	0	-	1	1	1	1	1	1	0	0	-	0	0	-	0	0	-
I	11170473	A-G	+	antisense	F28D9.1;F28D9.4;Y52B11C.1	5	4	0.8	0	0	-	0	0	-	0	0	-	0	0	-	1	1	1	1	0	0	0	0	-	0	0	-	0	0	-
I	11170479	A-G	+	antisense	F28D9.1;F28D9.4;Y52B11C.1	5	1	0.2	0	0	-	0	0	-	0	0	-	0	0	-	2	2	1	0	0	-	0	0	-	0	0	-	0	0	-
I	11170482	A-G	+	antisense	F28D9.1;F28D9.4;Y52B11C.1	5	1	0.2	0	0	-	0	0	-	0	0	-	0	0	-	2	1	0.5	0	0	-	0	0	-	0	0	-	0	0	-
I	11170485	A-G	+	antisense	F28D9.1;F28D9.4;Y52B11C.1	5	2	0.4	0	0	-	0	0	-	0	0	-	0	0	-	2	1	0.5	0	0	-	0	0	-	0	0	-	0	0	-
I	11170489	A-G	+	antisense	F28D9.1;F28D9.4;Y52B11C.1	5	2	0.4	0	0	-	0	0	-	0	0	-	0	0	-	2	0	0	0	0	-	0	0	-	0	0	-	0	0	-
I	11170490	A-G	+	antisense	F28D9.1;F28D9.4;Y52B11C.1	5	4	0.8	0	0	-	0	0	-	0	0	-	0	0	-	2	2	1	0	0	-	0	0	-	0	0	-	0	0	-
I	11172034	A-G	-	intron	F28D9.1;F28D9.4;Y52B11C.1	1	1	1	1	1	1	0	0	-	0	0	-	0	0	-	1	1	1	0	0	-	0	0	-	0	0	-	0	0	-
I	11172055	A-G	-	intron	F28D9.1;F28D9.4;Y52B11C.1	1	1	1	1	1	1	1	0	0	0	0	-	0	0	-	1	1	1	0	0	-	0	0	-	0	0	-	0	0	-
I	11172064	A-G	-	intron	F28D9.1;F28D9.4;Y52B11C.1	1	0	0	1	1	1	1	0	0	0	0	-	0	0	-	1	1	1	0	0	-	0	0	-	0	0	-	0	0	-
I	11172065	A-G	-	intron	F28D9.1;F28D9.4;Y52B11C.1	1	0	0	1	1	1	1	0	0	0	0	-	0	0	-	1	1	1	0	0	-	0	0	-	0	0	-	0	0	-
I	11172066	A-G	-	intron	F28D9.1;F28D9.4;Y52B11C.1	1	1	1	1	1	1	1	0	0	0	0	-	0	0	-	1	1	1	0	0	-	0	0	-	0	0	-	0	0	-
I	11172067	A-G	-	intron	F28D9.1;F28D9.4;Y52B11C.1	1	1	1	1	1	1	1	0	0	0	0	-	0	0	-	1	0	0	0	0	-	0	0	-	0	0	-	0	0	-
I	11172072	A-G	-	intron	F28D9.1;F28D9.4;Y52B11C.1	1	1	1	1	1	1	1	0	0	0	0	-	0	0	-	1	1	1	0	0	-	0	0	-	0	0	-	0	0	-
I	11172080	A-G	-	intron	F28D9.1;F28D9.4;Y52B11C.1	1	1	1	1	1	1	1	0	0	0	0	-	0	0	-	1	1	1	0	0	-	0	0	-	0	0	-	0	0	-
I	11172086	A-G	-	intron	F28D9.1;F28D9.4;Y52B11C.1	1	1	1	1	1	1	1	0	0	0	0	-	0	0	-	1	1	1	0	0	-	0	0	-	0	0	-	0	0	-
I	11172093	A-G	-	intron	F28D9.1;F28D9.4;Y52B11C.1	1	1	1	1	1	1	1	0	0	0	0	-	0	0	-	1	1	1	0	0	-	0	0	-	0	0	-	0	0	-
I	11172094	A-G	-	intron	F28D9.1;F28D9.4;Y52B11C.1	1	1	1	1	0	0	1	0	0	0	0	-	0	0	-	1	1	1	0	0	-	0	0	-	0	0	-	0	0	-
I	11172095	A-G	-	intron	F28D9.1;F28D9.4;Y52B11C.1	1	1	1	1	0	0	1	0	0	0	0	-	0	0	-	1	1	1	0	0	-	0	0	-	0	0	-	0	0	-
I	11172108	A-G	-	intron	F28D9.1;F28D9.4;Y52B11C.1	1	1	1	1	1	1	1	0	0	0	0	-	0	0	-	1	0	0	0	0	-	0	0	-	0	0	-	0	0	-
I	11172109	A-G	-	intron	F28D9.1;F28D9.4;Y52B11C.1	1	1	1	1	1	1	1	0	0	0	0	-	0	0	-	1	1	1	0	0	-	0	0	-	0	0	-	0	0	-
I	11172122	A-G	-	intron	F28D9.1;F28D9.4;Y52B11C.1	1	0	0	3	1	0.333333	2	0	0	0	0	-	0	0	-	1	1	1	0	0	-	0	0	-	0	0	-	1	0	0
I	11172123	A-G	-	intron	F28D9.1;F28D9.4;Y52B11C.1	1	1	1	3	2	0.666667	2	1	0.5	0	0	-	0	0	-	1	0	0	0	0	-	0	0	-	0	0	-	1	0	0
I	11172124	A-G	-	intron	F28D9.1;F28D9.4;Y52B11C.1	1	1	1	3	2	0.666667	2	1	0.5	0	0	-	0	0	-	1	1	1	0	0	-	0	0	-	0	0	-	1	0	0
I	11172125	A-G	-	intron	F28D9.1;F28D9.4;Y52B11C.1	1	1	1	3	2	0.666667	2	1	0.5	0	0	-	0	0	-	1	1	1	0	0	-	0	0	-	0	0	-	1	0	0
I	11172126	A-G	-	intron	F28D9.1;F28D9.4;Y52B11C.1	1	1	1	3	2	0.666667	2	1	0.5	0	0	-	0	0	-	1	1	1	0	0	-	0	0	-	0	0	-	1	0	0
I	11172137	A-G	+	antisense	F28D9.1;F28D9.4;Y52B11C.1	6	4	0.666667	1	0	0	0	0	-	0	0	-	0	0	-	0	0	-	0	0	-	1	1	1	1	0	0	0	0	-
I	11172142	A-G	+	antisense	F28D9.1;F28D9.4;Y52B11C.1	5	2	0.4	2	2	1	0	0	-	0	0	-	0	0	-	0	0	-	4	0	0	1	0	0	1	0	0	0	0	-
I	11172143	A-G	-	intron	F28D9.1;F28D9.4;Y52B11C.1	1	1	1	2	0	0	2	0	0	0	0	-	0	0	-	1	1	1	0	0	-	0	0	-	0	0	-	1	0	0
I	11172148	A-G	-	intron	F28D9.1;F28D9.4;Y52B11C.1	1	1	1	2	1	0.5	2	0	0	0	0	-	0	0	-	1	1	1	0	0	-	0	0	-	0	0	-	1	0	0
I	11172149	A-G	-	intron	F28D9.1;F28D9.4;Y52B11C.1	1	1	1	2	1	0.5	2	0	0	0	0	-	0	0	-	1	1	1	0	0	-	0	0	-	0	0	-	1	0	0
I	11172150	A-G	+	antisense	F28D9.1;F28D9.4;Y52B11C.1	7	6	0.857143	2	2	1	0	0	-	0	0	-	0	0	-	0	0	-	4	4	1	3	2	0.666667	1	0	0	0	0	-
I	11172156	A-G	-	intron	F28D9.1;F28D9.4;Y52B11C.1	1	1	1	3	2	0.666667	2	0	0	0	0	-	0	0	-	1	1	1	0	0	-	0	0	-	0	0	-	1	0	0
I	11172157	A-G	-	intron	F28D9.1;F28D9.4;Y52B11C.1	1	1	1	3	1	0.333333	2	1	0.5	0	0	-	0	0	-	1	0	0	0	0	-	0	0	-	0	0	-	1	0	0
I	11172159	A-G	-	intron	F28D9.1;F28D9.4;Y52B11C.1	1	1	1	3	2	0.666667	2	1	0.5	0	0	-	0	0	-	1	1	1	0	0	-	0	0	-	0	0	-	1	0	0
I	11172162	A-G	-	intron	F28D9.1;F28D9.4;Y52B11C.1	1	1	1	2	1	0.5	2	1	0.5	0	0	-	0	0	-	1	1	1	0	0	-	0	0	-	0	0	-	1	0	0
I	11172163	A-G	+	antisense	F28D9.1;F28D9.4;Y52B11C.1	8	8	1	3	3	1	0	0	-	0	0	-	0	0	-	1	1	1	5	5	1	4	4	1	1	1	1	0	0	-
I	11172164	A-G	+	antisense	F28D9.1;F28D9.4;Y52B11C.1	8	6	0.75	3	2	0.666667	0	0	-	0	0	-	0	0	-	1	0	0	5	3	0.6	4	1	0.25	1	0	0	0	0	-
I	11172166	A-G	+	antisense	F28D9.1;F28D9.4;Y52B11C.1	8	4	0.5	3	1	0.333333	0	0	-	0	0	-	0	0	-	1	0	0	5	1	0.2	4	3	0.75	1	0	0	0	0	-
I	11172167	A-G	+	antisense	F28D9.1;F28D9.4;Y52B11C.1	8	0	0	3	0	0	0	0	-	0	0	-	0	0	-	1	0	0	5	0	0	4	2	0.5	1	0	0	0	0	-
I	11172173	A-G	+	antisense	F28D9.1;F28D9.4;Y52B11C.1	7	4	0.571429	3	2	0.666667	0	0	-	0	0	-	0	0	-	1	1	1	6	2	0.333333	4	3	0.75	1	0	0	0	0	-
I	11172175	A-G	+	antisense	F28D9.1;F28D9.4;Y52B11C.1	7	3	0.428571	3	2	0.666667	0	0	-	0	0	-	0	0	-	1	1	1	6	0	0	4	1	0.25	1	0	0	0	0	-
I	11172176	A-G	+	antisense	F28D9.1;F28D9.4;Y52B11C.1	7	3	0.428571	3	3	1	0	0	-	0	0	-	0	0	-	1	0	0	6	2	0.333333	4	3	0.75	1	0	0	0	0	-
I	11172184	A-G	+	antisense	F28D9.1;F28D9.4;Y52B11C.1	9	5	0.555556	3	2	0.666667	0	0	-	0	0	-	0	0	-	1	1	1	6	1	0.166667	4	1	0.25	1	0	0	0	0	-
I	11172185	A-G	+	antisense	F28D9.1;F28D9.4;Y52B11C.1	9	6	0.666667	3	1	0.333333	0	0	-	0	0	-	0	0	-	1	0	0	6	2	0.333333	4	3	0.75	1	0	0	0	0	-
I	11172186	A-G	+	antisense	F28D9.1;F28D9.4;Y52B11C.1	9	2	0.222222	3	0	0	0	0	-	0	0	-	0	0	-	1	0	0	6	0	0	4	1	0.25	1	0	0	0	0	-
I	11172187	A-G	-	intron	F28D9.1;F28D9.4;Y52B11C.1	1	1	1	2	1	0.5	2	1	0.5	0	0	-	0	0	-	1	1	1	0	0	-	0	0	-	0	0	-	1	0	0
I	11172189	A-G	+	antisense	F28D9.1;F28D9.4;Y52B11C.1	9	3	0.333333	3	1	0.333333	0	0	-	0	0	-	0	0	-	1	0	0	6	1	0.166667	4	2	0.5	1	0	0	0	0	-
I	11172194	A-G	+	antisense	F28D9.1;F28D9.4;Y52B11C.1	9	0	0	3	0	0	0	0	-	0	0	-	0	0	-	1	0	0	6	2	0.333333	4	0	0	1	0	0	0	0	-
I	11172197	A-G	-	intron	F28D9.1;F28D9.4;Y52B11C.1	1	1	1	3	2	0.666667	2	0	0	0	0	-	0	0	-	1	0	0	0	0	-	0	0	-	0	0	-	1	0	0
I	11172210	A-G	+	antisense	F28D9.1;F28D9.4;Y52B11C.1	9	6	0.666667	3	2	0.666667	0	0	-	0	0	-	0	0	-	1	1	1	6	3	0.5	3	3	1	1	0	0	0	0	-
I	11172212	A-G	+	antisense	F28D9.1;F28D9.4;Y52B11C.1	9	4	0.444444	3	1	0.333333	0	0	-	0	0	-	0	0	-	1	0	0	6	1	0.166667	3	0	0	1	0	0	0	0	-
I	11172215	A-G	+	antisense	F28D9.1;F28D9.4;Y52B11C.1	10	1	0.1	3	1	0.333333	0	0	-	0	0	-	0	0	-	1	0	0	6	0	0	3	2	0.666667	1	0	0	0	0	-
I	11172217	A-G	-	intron	F28D9.1;F28D9.4;Y52B11C.1	2	1	0.5	2	1	0.5	2	0	0	0	0	-	0	0	-	1	0	0	0	0	-	0	0	-	0	0	-	1	0	0
I	11173736	A-G	-	intron	F28D9.1;F28D9.4;Y52B11C.1	1	1	1	1	1	1	0	0	-	0	0	-	0	0	-	0	0	-	0	0	-	0	0	-	0	0	-	0	0	-
I	11173744	A-G	-	intron	F28D9.1;F28D9.4;Y52B11C.1	1	1	1	1	1	1	0	0	-	0	0	-	0	0	-	0	0	-	1	0	0	0	0	-	0	0	-	0	0	-
I	11173752	A-G	-	intron	F28D9.1;F28D9.4;Y52B11C.1	1	1	1	1	1	1	0	0	-	0	0	-	0	0	-	0	0	-	1	0	0	0	0	-	0	0	-	0	0	-
I	11173775	A-G	-	intron	F28D9.1;F28D9.4;Y52B11C.1	1	1	1	2	2	1	0	0	-	0	0	-	0	0	-	0	0	-	1	0	0	0	0	-	0	0	-	1	1	1
I	11173787	A-G	-	intron	F28D9.1;F28D9.4;Y52B11C.1	1	1	1	2	2	1	0	0	-	0	0	-	0	0	-	0	0	-	1	0	0	0	0	-	0	0	-	1	1	1
I	11173789	A-G	-	intron	F28D9.1;F28D9.4;Y52B11C.1	1	1	1	2	2	1	0	0	-	0	0	-	0	0	-	0	0	-	1	1	1	0	0	-	0	0	-	1	1	1
I	11173799	A-G	-	intron	F28D9.1;F28D9.4;Y52B11C.1	1	1	1	2	2	1	0	0	-	0	0	-	0	0	-	0	0	-	1	0	0	0	0	-	0	0	-	1	1	1
I	11173839	A-G	-	intron	F28D9.1;F28D9.4;Y52B11C.1	1	1	1	4	1	0.25	0	0	-	0	0	-	0	0	-	0	0	-	1	0	0	1	0	0	0	0	-	2	1	0.5
I	11173855	A-G	-	intron	F28D9.1;F28D9.4;Y52B11C.1	1	1	1	4	4	1	0	0	-	0	0	-	0	0	-	0	0	-	1	1	1	1	1	1	0	0	-	2	2	1
I	11173872	A-G	-	intron	F28D9.1;F28D9.4;Y52B11C.1	1	1	1	4	2	0.5	0	0	-	0	0	-	0	0	-	0	0	-	1	0	0	1	1	1	0	0	-	2	2	1
I	11173879	A-G	-	intron	F28D9.1;F28D9.4;Y52B11C.1	1	1	1	4	3	0.75	0	0	-	0	0	-	0	0	-	0	0	-	1	0	0	1	1	1	0	0	-	2	0	0
I	11173894	A-G	-	intron	F28D9.1;F28D9.4;Y52B11C.1	0	0	-	4	3	0.75	0	0	-	0	0	-	0	0	-	0	0	-	1	0	0	1	0	0	0	0	-	2	2	1
I	11173903	A-G	-	intron	F28D9.1;F28D9.4;Y52B11C.1	1	1	1	4	1	0.25	0	0	-	0	0	-	0	0	-	0	0	-	1	0	0	1	0	0	0	0	-	2	1	0.5
I	11173913	A-G	-	intron	F28D9.1;F28D9.4;Y52B11C.1	1	0	0	4	1	0.25	0	0	-	0	0	-	0	0	-	0	0	-	1	1	1	1	0	0	0	0	-	2	2	1
I	11173924	A-G	-	intron	F28D9.1;F28D9.4;Y52B11C.1	1	0	0	4	2	0.5	0	0	-	0	0	-	0	0	-	0	0	-	1	0	0	1	0	0	0	0	-	2	0	0
I	11173926	A-G	-	intron	F28D9.1;F28D9.4;Y52B11C.1	1	0	0	4	0	0	0	0	-	0	0	-	0	0	-	0	0	-	1	0	0	1	1	1	0	0	-	2	1	0.5
I	11173965	A-G	-	intron	F28D9.1;F28D9.4;Y52B11C.1	1	0	0	3	0	0	0	0	-	0	0	-	0	0	-	0	0	-	0	0	-	1	1	1	0	0	-	1	1	1
I	11173967	A-G	-	intron	F28D9.1;F28D9.4;Y52B11C.1	1	1	1	3	3	1	0	0	-	0	0	-	0	0	-	0	0	-	0	0	-	1	0	0	0	0	-	1	0	0
I	11173970	A-G	-	intron	F28D9.1;F28D9.4;Y52B11C.1	1	1	1	3	3	1	0	0	-	0	0	-	0	0	-	0	0	-	0	0	-	1	1	1	0	0	-	1	1	1
I	11173978	A-G	-	intron	F28D9.1;F28D9.4;Y52B11C.1	0	0	-	3	0	0	0	0	-	0	0	-	0	0	-	0	0	-	0	0	-	1	1	1	0	0	-	1	1	1
I	11173979	A-G	-	intron	F28D9.1;F28D9.4;Y52B11C.1	0	0	-	3	0	0	0	0	-	0	0	-	0	0	-	0	0	-	0	0	-	1	1	1	0	0	-	1	1	1
I	11173986	A-G	-	intron	F28D9.1;F28D9.4;Y52B11C.1	0	0	-	3	0	0	0	0	-	0	0	-	0	0	-	0	0	-	0	0	-	1	1	1	0	0	-	1	1	1
I	11173989	A-G	-	intron	F28D9.1;F28D9.4;Y52B11C.1	0	0	-	3	1	0.333333	0	0	-	0	0	-	0	0	-	0	0	-	0	0	-	1	1	1	0	0	-	1	1	1
I	11173990	A-G	-	intron	F28D9.1;F28D9.4;Y52B11C.1	0	0	-	3	2	0.666667	0	0	-	0	0	-	0	0	-	0	0	-	0	0	-	1	1	1	0	0	-	1	1	1
I	11173991	A-G	-	intron	F28D9.1;F28D9.4;Y52B11C.1	0	0	-	3	3	1	0	0	-	0	0	-	0	0	-	0	0	-	0	0	-	1	1	1	0	0	-	1	1	1
I	11174000	A-G	-	intron	F28D9.1;F28D9.4;Y52B11C.1	0	0	-	3	2	0.666667	0	0	-	0	0	-	0	0	-	0	0	-	0	0	-	1	1	1	0	0	-	1	0	0
I	11174061	A-G	-	intron	F28D9.1;F28D9.4;Y52B11C.1	1	1	1	1	1	1	0	0	-	0	0	-	0	0	-	0	0	-	0	0	-	0	0	-	1	1	1	0	0	-
I	11174081	A-G	-	intron	F28D9.1;F28D9.4;Y52B11C.1	1	1	1	1	1	1	0	0	-	0	0	-	0	0	-	0	0	-	0	0	-	0	0	-	1	1	1	0	0	-
I	11174099	A-G	-	intron	F28D9.1;F28D9.4;Y52B11C.1	1	1	1	1	1	1	0	0	-	0	0	-	0	0	-	0	0	-	0	0	-	0	0	-	1	0	0	0	0	-
I	11174207	A-G	-	intron	F28D9.1;F28D9.4;Y52B11C.1	0	0	-	1	1	1	0	0	-	0	0	-	0	0	-	0	0	-	1	1	1	0	0	-	1	1	1	0	0	-
I	11174208	A-G	-	intron	F28D9.1;F28D9.4;Y52B11C.1	0	0	-	1	1	1	0	0	-	0	0	-	0	0	-	0	0	-	1	1	1	0	0	-	1	1	1	0	0	-
I	11215409	A-G	+	downstream	null	1	1	1	1	1	1	0	0	-	0	0	-	0	0	-	0	0	-	1	0	0	0	0	-	0	0	-	0	0	-
I	11215441	A-G	+	downstream	null	1	1	1	1	1	1	0	0	-	0	0	-	0	0	-	0	0	-	0	0	-	0	0	-	0	0	-	0	0	-
I	11224299	A-G	+	downstream	Y53H1A.2	1	0	0	7	2	0.285714	2	0	0	5	0	0	5	0	0	8	1	0.125	4	0	0	2	0	0	1	0	0	0	0	-
I	11224304	A-G	+	downstream	Y53H1A.2	1	0	0	7	3	0.428571	2	0	0	5	0	0	5	0	0	8	2	0.25	4	0	0	2	0	0	1	0	0	0	0	-
I	11224742	A-G	+	upstream	Y53H1A.5	4	0	0	0	0	-	4	1	0.25	1	0	0	0	0	-	3	1	0.333333	11	2	0.181818	4	2	0.5	0	0	-	0	0	-
I	11224743	A-G	+	upstream	Y53H1A.5	4	2	0.5	0	0	-	4	0	0	1	0	0	0	0	-	3	0	0	11	0	0	3	0	0	0	0	-	0	0	-
I	11224753	A-G	+	upstream	Y53H1A.5	3	0	0	0	0	-	4	0	0	0	0	-	0	0	-	3	0	0	9	1	0.111111	4	1	0.25	0	0	-	0	0	-
I	11224761	A-G	+	upstream	Y53H1A.5	4	2	0.5	0	0	-	4	1	0.25	1	0	0	0	0	-	3	1	0.333333	11	4	0.363636	5	2	0.4	0	0	-	0	0	-
I	11226076	A-G	+	intron	Y53H1A.5	2	0	0	0	0	-	0	0	-	0	0	-	0	0	-	3	0	0	5	1	0.2	3	1	0.333333	1	0	0	2	0	0
I	11226082	A-G	+	intron	Y53H1A.5	2	0	0	0	0	-	0	0	-	0	0	-	0	0	-	3	2	0.666667	5	0	0	3	1	0.333333	1	0	0	2	2	1
I	11226819	A-G	+	intron	Y53H1A.5	0	0	-	0	0	-	0	0	-	0	0	-	1	1	1	0	0	-	2	2	1	1	1	1	0	0	-	1	1	1
I	11226829	A-G	+	intron	Y53H1A.5	1	1	1	0	0	-	0	0	-	0	0	-	1	1	1	0	0	-	3	1	0.333333	1	1	1	0	0	-	1	1	1
I	11226838	A-G	+	intron	Y53H1A.5	1	1	1	0	0	-	0	0	-	0	0	-	1	0	0	1	1	1	3	0	0	1	1	1	0	0	-	1	0	0
I	11226897	A-G	+	intron	Y53H1A.5	1	1	1	0	0	-	0	0	-	0	0	-	1	1	1	1	1	1	3	1	0.333333	1	1	1	0	0	-	1	0	0
I	11226898	A-G	+	intron	Y53H1A.5	1	1	1	0	0	-	0	0	-	0	0	-	1	1	1	1	1	1	3	2	0.666667	1	1	1	0	0	-	1	1	1
I	11226900	A-G	+	intron	Y53H1A.5	1	1	1	0	0	-	0	0	-	0	0	-	1	0	0	1	0	0	3	2	0.666667	1	0	0	0	0	-	1	0	0
I	11226911	A-G	+	intron	Y53H1A.5	1	1	1	0	0	-	0	0	-	0	0	-	1	1	1	1	1	1	3	2	0.666667	0	0	-	0	0	-	1	1	1
I	11227604	A-G	+	intron	Y53H1A.5	2	0	0	0	0	-	2	2	1	0	0	-	0	0	-	3	0	0	0	0	-	0	0	-	0	0	-	0	0	-
I	11227631	A-G	+	intron	Y53H1A.5	2	0	0	0	0	-	2	2	1	0	0	-	0	0	-	3	0	0	0	0	-	0	0	-	0	0	-	0	0	-
I	11227638	A-G	+	intron	Y53H1A.5	2	0	0	0	0	-	2	2	1	0	0	-	0	0	-	3	0	0	0	0	-	0	0	-	0	0	-	0	0	-
I	11227681	A-G	+	intron	Y53H1A.5	2	0	0	0	0	-	2	2	1	0	0	-	0	0	-	3	0	0	0	0	-	0	0	-	0	0	-	0	0	-
I	11227692	A-G	+	intron	Y53H1A.5	2	1	0.5	0	0	-	2	2	1	0	0	-	0	0	-	3	1	0.333333	0	0	-	0	0	-	0	0	-	0	0	-
I	11227693	A-G	+	intron	Y53H1A.5	2	2	1	0	0	-	2	2	1	0	0	-	0	0	-	3	1	0.333333	0	0	-	0	0	-	0	0	-	0	0	-
I	11227699	A-G	+	intron	Y53H1A.5	2	0	0	0	0	-	2	1	0.5	0	0	-	0	0	-	3	1	0.333333	0	0	-	0	0	-	0	0	-	0	0	-
I	11227703	A-G	+	intron	Y53H1A.5	2	2	1	0	0	-	1	1	1	0	0	-	0	0	-	3	1	0.333333	0	0	-	0	0	-	0	0	-	0	0	-
I	11227704	A-G	+	intron	Y53H1A.5	2	2	1	0	0	-	1	1	1	0	0	-	0	0	-	3	1	0.333333	0	0	-	0	0	-	0	0	-	0	0	-
I	11227707	A-G	+	intron	Y53H1A.5	2	1	0.5	0	0	-	1	1	1	0	0	-	0	0	-	3	0	0	0	0	-	0	0	-	0	0	-	0	0	-
I	11227708	A-G	+	intron	Y53H1A.5	2	0	0	0	0	-	1	1	1	0	0	-	0	0	-	3	1	0.333333	0	0	-	0	0	-	0	0	-	0	0	-
I	11227825	A-G	+	intron	Y53H1A.5	0	0	-	0	0	-	0	0	-	1	1	1	0	0	-	1	1	1	0	0	-	1	1	1	0	0	-	0	0	-
I	11227845	A-G	+	intron	Y53H1A.5	0	0	-	0	0	-	0	0	-	1	1	1	0	0	-	1	1	1	0	0	-	1	1	1	0	0	-	0	0	-
I	11227905	A-G	+	intron	Y53H1A.5	4	4	1	0	0	-	0	0	-	1	1	1	3	3	1	1	1	1	1	1	1	0	0	-	1	1	1	1	1	1
I	11227914	A-G	+	intron	Y53H1A.5	5	0	0	1	0	0	0	0	-	1	0	0	3	0	0	1	0	0	1	1	1	1	1	1	1	1	1	1	0	0
I	11227915	A-G	+	intron	Y53H1A.5	5	1	0.2	1	0	0	0	0	-	1	0	0	3	0	0	1	0	0	1	1	1	1	1	1	1	0	0	1	0	0
I	11227919	A-G	+	intron	Y53H1A.5	5	1	0.2	1	1	1	0	0	-	1	0	0	3	1	0.333333	1	1	1	1	0	0	1	0	0	1	0	0	1	0	0
I	11227920	A-G	+	intron	Y53H1A.5	5	3	0.6	1	1	1	0	0	-	1	1	1	3	1	0.333333	1	1	1	1	1	1	1	1	1	1	1	1	1	0	0
I	11227924	A-G	+	intron	Y53H1A.5	5	3	0.6	1	0	0	1	1	1	1	0	0	3	1	0.333333	1	1	1	1	0	0	1	0	0	1	0	0	1	1	1
I	11227926	A-G	+	intron	Y53H1A.5	6	0	0	2	1	0.5	1	0	0	1	0	0	3	0	0	2	0	0	1	0	0	1	1	1	1	1	1	1	0	0
I	11227937	A-G	+	intron	Y53H1A.5	7	7	1	2	2	1	1	1	1	1	1	1	4	4	1	3	3	1	2	2	1	2	2	1	1	1	1	1	1	1
I	11227938	A-G	+	intron	Y53H1A.5	7	5	0.714286	2	1	0.5	1	0	0	1	1	1	4	2	0.5	3	3	1	2	0	0	2	1	0.5	1	1	1	1	1	1
I	11227940	A-G	+	intron	Y53H1A.5	7	4	0.571429	2	1	0.5	1	1	1	1	0	0	4	4	1	3	1	0.333333	2	1	0.5	2	0	0	1	0	0	1	1	1
I	11227941	A-G	+	intron	Y53H1A.5	7	1	0.142857	2	1	0.5	1	1	1	1	0	0	4	1	0.25	3	0	0	2	0	0	1	0	0	1	0	0	1	0	0
I	11227948	A-G	+	intron	Y53H1A.5	7	2	0.285714	2	2	1	1	0	0	1	0	0	4	0	0	3	1	0.333333	2	0	0	3	1	0.333333	1	0	0	1	0	0
I	11227950	A-G	+	intron	Y53H1A.5	7	2	0.285714	2	0	0	1	1	1	1	1	1	4	0	0	3	0	0	2	0	0	3	2	0.666667	1	1	1	1	0	0
I	11227954	A-G	+	intron	Y53H1A.5	7	2	0.285714	2	0	0	1	0	0	1	0	0	4	0	0	3	0	0	2	1	0.5	3	0	0	1	0	0	1	0	0
I	11227956	A-G	+	intron	Y53H1A.5	7	4	0.571429	2	1	0.5	1	1	1	1	1	1	4	3	0.75	3	3	1	2	0	0	3	3	1	0	0	-	1	1	1
I	11227957	A-G	+	intron	Y53H1A.5	7	5	0.714286	2	2	1	1	1	1	1	1	1	4	4	1	3	3	1	2	2	1	3	3	1	0	0	-	1	1	1
I	11227958	A-G	+	intron	Y53H1A.5	5	1	0.2	2	0	0	1	0	0	1	0	0	4	1	0.25	3	0	0	2	1	0.5	3	0	0	0	0	-	1	0	0
I	11227959	A-G	+	intron	Y53H1A.5	7	1	0.142857	2	1	0.5	1	1	1	1	0	0	4	1	0.25	3	0	0	2	1	0.5	3	1	0.333333	0	0	-	1	0	0
I	11227961	A-G	+	intron	Y53H1A.5	6	2	0.333333	2	0	0	1	0	0	1	0	0	4	1	0.25	3	1	0.333333	2	0	0	3	2	0.666667	0	0	-	1	1	1
I	11227965	A-G	+	intron	Y53H1A.5	7	3	0.428571	2	0	0	1	1	1	1	0	0	4	0	0	3	2	0.666667	2	0	0	3	2	0.666667	0	0	-	1	0	0
I	11227968	A-G	+	intron	Y53H1A.5	7	3	0.428571	2	0	0	1	0	0	1	0	0	4	4	1	3	2	0.666667	2	0	0	3	1	0.333333	0	0	-	1	1	1
I	11227969	A-G	+	intron	Y53H1A.5	7	1	0.142857	2	0	0	1	0	0	1	0	0	4	2	0.5	3	0	0	2	0	0	3	1	0.333333	0	0	-	1	0	0
I	11227971	A-G	+	intron	Y53H1A.5	7	1	0.142857	2	1	0.5	1	1	1	1	0	0	4	0	0	3	0	0	2	1	0.5	3	0	0	0	0	-	1	1	1
I	11227972	A-G	+	intron	Y53H1A.5	7	5	0.714286	2	2	1	1	1	1	1	0	0	4	2	0.5	3	2	0.666667	2	1	0.5	3	2	0.666667	0	0	-	1	1	1
I	11227973	A-G	+	intron	Y53H1A.5	7	2	0.285714	2	1	0.5	1	1	1	1	0	0	4	1	0.25	3	0	0	2	0	0	3	0	0	0	0	-	1	0	0
I	11227975	A-G	+	intron	Y53H1A.5	5	1	0.2	2	1	0.5	1	0	0	1	0	0	3	1	0.333333	3	0	0	2	0	0	3	1	0.333333	0	0	-	1	1	1
I	11227976	A-G	+	intron	Y53H1A.5	7	2	0.285714	2	1	0.5	1	1	1	1	1	1	3	0	0	3	1	0.333333	2	2	1	3	1	0.333333	1	0	0	1	1	1
I	11227977	A-G	+	intron	Y53H1A.5	7	0	0	2	1	0.5	1	1	1	1	1	1	4	0	0	3	0	0	2	0	0	3	0	0	1	0	0	1	1	1
I	11227978	A-G	+	intron	Y53H1A.5	7	2	0.285714	2	0	0	1	0	0	1	0	0	4	0	0	3	0	0	2	0	0	3	0	0	1	0	0	1	0	0
I	11227982	A-G	+	intron	Y53H1A.5	6	6	1	2	2	1	1	1	1	1	1	1	4	4	1	3	3	1	2	2	1	3	3	1	1	1	1	1	1	1
I	11227991	A-G	+	intron	Y53H1A.5	4	1	0.25	2	1	0.5	1	0	0	0	0	-	4	1	0.25	3	1	0.333333	2	0	0	4	0	0	1	1	1	1	0	0
I	11227998	A-G	+	intron	Y53H1A.5	5	4	0.8	2	2	1	1	1	1	0	0	-	4	1	0.25	3	0	0	2	2	1	3	2	0.666667	1	1	1	1	1	1
I	11227999	A-G	+	intron	Y53H1A.5	5	2	0.4	2	1	0.5	1	1	1	0	0	-	4	1	0.25	3	3	1	2	1	0.5	3	2	0.666667	1	1	1	1	1	1
I	11228001	A-G	+	intron	Y53H1A.5	5	1	0.2	2	0	0	1	0	0	0	0	-	3	1	0.333333	3	0	0	2	0	0	3	0	0	1	0	0	1	0	0
I	11228005	A-G	+	intron	Y53H1A.5	5	0	0	2	0	0	1	1	1	0	0	-	4	1	0.25	2	0	0	1	1	1	3	0	0	1	0	0	1	0	0
I	11228007	A-G	+	intron	Y53H1A.5	5	3	0.6	2	1	0.5	1	1	1	0	0	-	4	3	0.75	2	2	1	1	0	0	3	1	0.333333	1	0	0	1	1	1
I	11228008	A-G	+	intron	Y53H1A.5	5	5	1	2	2	1	1	1	1	0	0	-	4	4	1	2	2	1	1	0	0	3	3	1	1	1	1	1	1	1
I	11228014	A-G	+	intron	Y53H1A.5	5	1	0.2	2	1	0.5	2	0	0	0	0	-	4	0	0	2	0	0	1	0	0	3	0	0	1	0	0	1	1	1
I	11228015	A-G	+	intron	Y53H1A.5	5	0	0	2	0	0	2	0	0	0	0	-	4	2	0.5	2	0	0	1	0	0	3	0	0	1	0	0	1	0	0
I	11228016	A-G	+	intron	Y53H1A.5	4	0	0	2	0	0	2	1	0.5	0	0	-	4	1	0.25	2	0	0	1	0	0	3	0	0	1	0	0	1	0	0
I	11228017	A-G	+	intron	Y53H1A.5	4	2	0.5	2	0	0	2	1	0.5	0	0	-	4	3	0.75	2	0	0	1	1	1	3	2	0.666667	1	0	0	1	1	1
I	11228018	A-G	+	intron	Y53H1A.5	5	1	0.2	2	0	0	2	0	0	0	0	-	4	1	0.25	2	1	0.5	1	0	0	3	1	0.333333	1	0	0	1	0	0
I	11228025	A-G	+	intron	Y53H1A.5	6	3	0.5	1	1	1	2	1	0.5	0	0	-	4	2	0.5	2	1	0.5	2	0	0	2	1	0.5	1	0	0	1	1	1
I	11228030	A-G	+	intron	Y53H1A.5	6	5	0.833333	2	1	0.5	2	2	1	0	0	-	4	3	0.75	2	1	0.5	2	2	1	2	2	1	1	1	1	1	0	0
I	11228035	A-G	+	intron	Y53H1A.5	6	4	0.666667	2	2	1	2	2	1	0	0	-	4	4	1	2	2	1	2	2	1	3	3	1	1	1	1	1	1	1
I	11228040	A-G	+	intron	Y53H1A.5	6	0	0	2	0	0	2	2	1	0	0	-	5	0	0	2	0	0	2	0	0	2	0	0	1	0	0	1	0	0
I	11228052	A-G	+	intron	Y53H1A.5	7	5	0.714286	2	2	1	2	2	1	0	0	-	5	4	0.8	3	2	0.666667	2	2	1	3	3	1	1	1	1	2	2	1
I	11228062	A-G	+	intron	Y53H1A.5	8	1	0.125	2	0	0	2	0	0	0	0	-	5	1	0.2	3	0	0	2	0	0	3	0	0	1	0	0	2	0	0
I	11228231	A-G	+	intron	Y53H1A.5	3	0	0	2	0	0	0	0	-	0	0	-	1	0	0	4	0	0	0	0	-	8	1	0.125	0	0	-	3	1	0.333333
I	11228237	A-G	+	intron	Y53H1A.5	4	0	0	2	0	0	0	0	-	0	0	-	1	0	0	6	0	0	0	0	-	9	1	0.111111	0	0	-	3	1	0.333333
I	11228251	A-G	+	intron	Y53H1A.5	4	0	0	2	0	0	0	0	-	0	0	-	1	0	0	8	1	0.125	0	0	-	8	1	0.125	0	0	-	3	1	0.333333
I	11228289	A-G	+	intron	Y53H1A.5	3	0	0	1	0	0	0	0	-	0	0	-	0	0	-	6	0	0	0	0	-	8	1	0.125	0	0	-	2	1	0.5
I	11231538	A-G	+	intron	Y53H1A.5	2	0	0	3	1	0.333333	1	1	1	0	0	-	0	0	-	0	0	-	2	1	0.5	5	3	0.6	0	0	-	0	0	-
I	11231543	A-G	+	intron	Y53H1A.5	3	0	0	3	1	0.333333	1	1	1	0	0	-	0	0	-	0	0	-	2	0	0	5	1	0.2	0	0	-	0	0	-
I	11231544	A-G	+	intron	Y53H1A.5	3	0	0	3	2	0.666667	1	1	1	0	0	-	0	0	-	0	0	-	2	0	0	5	1	0.2	0	0	-	0	0	-
I	11231545	A-G	+	intron	Y53H1A.5	3	0	0	3	0	0	1	0	0	0	0	-	0	0	-	0	0	-	2	0	0	5	2	0.4	0	0	-	0	0	-
I	11231546	A-G	+	intron	Y53H1A.5	3	0	0	3	1	0.333333	1	0	0	0	0	-	0	0	-	0	0	-	2	0	0	5	3	0.6	0	0	-	0	0	-
I	11231551	A-G	+	intron	Y53H1A.5	3	0	0	3	2	0.666667	1	0	0	0	0	-	0	0	-	0	0	-	2	1	0.5	5	1	0.2	0	0	-	0	0	-
I	11231558	A-G	+	intron	Y53H1A.5	3	1	0.333333	3	3	1	1	1	1	0	0	-	0	0	-	0	0	-	2	2	1	6	4	0.666667	0	0	-	0	0	-
I	11231565	A-G	+	intron	Y53H1A.5	3	1	0.333333	3	3	1	1	1	1	0	0	-	0	0	-	0	0	-	2	2	1	6	3	0.5	0	0	-	0	0	-
I	11231575	A-G	+	intron	Y53H1A.5	1	0	0	3	3	1	1	1	1	0	0	-	0	0	-	0	0	-	2	0	0	4	0	0	0	0	-	0	0	-
I	11231578	A-G	+	intron	Y53H1A.5	1	0	0	3	1	0.333333	1	1	1	0	0	-	0	0	-	0	0	-	2	0	0	4	0	0	0	0	-	0	0	-
I	11231580	A-G	+	intron	Y53H1A.5	1	0	0	3	2	0.666667	1	0	0	0	0	-	0	0	-	0	0	-	2	1	0.5	4	3	0.75	0	0	-	0	0	-
I	11231581	A-G	+	intron	Y53H1A.5	1	0	0	3	3	1	1	1	1	0	0	-	0	0	-	0	0	-	2	2	1	4	3	0.75	0	0	-	0	0	-
I	11231586	A-G	+	intron	Y53H1A.5	1	0	0	3	2	0.666667	1	0	0	0	0	-	0	0	-	0	0	-	2	1	0.5	4	2	0.5	0	0	-	0	0	-
I	11231587	A-G	+	intron	Y53H1A.5	1	0	0	3	3	1	1	1	1	0	0	-	0	0	-	0	0	-	2	1	0.5	4	0	0	0	0	-	0	0	-
I	11231588	A-G	+	intron	Y53H1A.5	1	0	0	3	3	1	1	0	0	0	0	-	0	0	-	0	0	-	2	0	0	4	0	0	0	0	-	0	0	-
I	11231592	A-G	+	intron	Y53H1A.5	1	0	0	3	3	1	1	0	0	0	0	-	0	0	-	0	0	-	2	1	0.5	4	3	0.75	0	0	-	0	0	-
I	11231595	A-G	+	intron	Y53H1A.5	1	0	0	3	3	1	1	0	0	0	0	-	0	0	-	0	0	-	2	0	0	4	1	0.25	0	0	-	0	0	-
I	11231602	A-G	+	intron	Y53H1A.5	1	0	0	3	3	1	1	0	0	0	0	-	0	0	-	0	0	-	2	1	0.5	5	1	0.2	0	0	-	0	0	-
I	11231623	A-G	+	intron	Y53H1A.5	0	0	-	3	2	0.666667	0	0	-	0	0	-	0	0	-	0	0	-	1	0	0	2	0	0	0	0	-	0	0	-
I	11231638	A-G	+	intron	Y53H1A.5	0	0	-	3	3	1	0	0	-	0	0	-	0	0	-	0	0	-	2	0	0	2	0	0	0	0	-	0	0	-
I	11231646	A-G	+	intron	Y53H1A.5	0	0	-	2	2	1	0	0	-	0	0	-	0	0	-	0	0	-	2	0	0	3	1	0.333333	0	0	-	0	0	-
I	11231647	A-G	+	intron	Y53H1A.5	0	0	-	2	2	1	0	0	-	0	0	-	0	0	-	0	0	-	2	0	0	3	1	0.333333	0	0	-	0	0	-
I	11231650	A-G	+	intron	Y53H1A.5	0	0	-	2	2	1	0	0	-	0	0	-	0	0	-	0	0	-	2	0	0	3	1	0.333333	0	0	-	0	0	-
I	11231667	A-G	+	intron	Y53H1A.5	0	0	-	2	2	1	0	0	-	0	0	-	0	0	-	0	0	-	2	1	0.5	3	1	0.333333	0	0	-	0	0	-
I	11232243	A-G	+	intron	Y53H1A.5	2	2	1	0	0	-	0	0	-	0	0	-	1	1	1	0	0	-	0	0	-	0	0	-	1	1	1	0	0	-
I	11232244	A-G	+	intron	Y53H1A.5	2	2	1	0	0	-	0	0	-	0	0	-	1	0	0	0	0	-	0	0	-	0	0	-	1	0	0	1	0	0
I	11232254	A-G	+	intron	Y53H1A.5	2	1	0.5	0	0	-	0	0	-	0	0	-	1	1	1	0	0	-	0	0	-	0	0	-	1	1	1	1	1	1
I	11232262	A-G	+	intron	Y53H1A.5	2	1	0.5	0	0	-	0	0	-	0	0	-	1	1	1	0	0	-	0	0	-	0	0	-	1	1	1	1	1	1
I	11232267	A-G	+	intron	Y53H1A.5	2	1	0.5	0	0	-	0	0	-	0	0	-	1	1	1	0	0	-	0	0	-	0	0	-	1	1	1	1	1	1
I	11232268	A-G	+	intron	Y53H1A.5	2	1	0.5	0	0	-	0	0	-	0	0	-	1	1	1	0	0	-	0	0	-	0	0	-	1	0	0	1	1	1
I	11232277	A-G	+	intron	Y53H1A.5	2	2	1	0	0	-	0	0	-	0	0	-	1	1	1	0	0	-	0	0	-	0	0	-	1	1	1	1	1	1
I	11232278	A-G	+	intron	Y53H1A.5	2	2	1	0	0	-	0	0	-	0	0	-	1	1	1	0	0	-	0	0	-	0	0	-	0	0	-	1	1	1
I	11232287	A-G	+	intron	Y53H1A.5	1	1	1	0	0	-	0	0	-	0	0	-	1	1	1	0	0	-	0	0	-	0	0	-	1	0	0	1	0	0
I	11232293	A-G	+	intron	Y53H1A.5	1	1	1	0	0	-	0	0	-	0	0	-	1	1	1	0	0	-	0	0	-	0	0	-	0	0	-	1	1	1
I	11232313	A-G	+	intron	Y53H1A.5	2	2	1	0	0	-	0	0	-	0	0	-	1	1	1	0	0	-	0	0	-	0	0	-	1	0	0	1	1	1
I	11232314	A-G	+	intron	Y53H1A.5	2	1	0.5	0	0	-	0	0	-	0	0	-	1	0	0	0	0	-	0	0	-	0	0	-	1	1	1	1	1	1
I	11232315	A-G	+	intron	Y53H1A.5	2	2	1	0	0	-	0	0	-	0	0	-	1	0	0	0	0	-	0	0	-	0	0	-	1	1	1	1	1	1
I	11232316	A-G	+	intron	Y53H1A.5	2	1	0.5	0	0	-	0	0	-	0	0	-	1	0	0	0	0	-	0	0	-	0	0	-	1	1	1	1	1	1
I	11232317	A-G	+	intron	Y53H1A.5	2	2	1	0	0	-	0	0	-	0	0	-	1	0	0	0	0	-	0	0	-	0	0	-	1	1	1	1	0	0
I	11232331	A-G	+	intron	Y53H1A.5	2	2	1	0	0	-	0	0	-	0	0	-	1	0	0	0	0	-	0	0	-	0	0	-	1	1	1	1	0	0
I	11232338	A-G	+	intron	Y53H1A.5	2	2	1	0	0	-	0	0	-	0	0	-	1	0	0	0	0	-	0	0	-	0	0	-	1	0	0	1	0	0
I	11232346	A-G	+	intron	Y53H1A.5	2	2	1	0	0	-	0	0	-	0	0	-	0	0	-	0	0	-	0	0	-	0	0	-	1	1	1	0	0	-
I	11232347	A-G	+	intron	Y53H1A.5	2	2	1	0	0	-	0	0	-	0	0	-	0	0	-	0	0	-	0	0	-	0	0	-	1	1	1	0	0	-
I	11232348	A-G	+	intron	Y53H1A.5	2	2	1	0	0	-	0	0	-	0	0	-	0	0	-	0	0	-	0	0	-	0	0	-	1	0	0	0	0	-
I	11232353	A-G	+	intron	Y53H1A.5	2	2	1	0	0	-	0	0	-	0	0	-	0	0	-	0	0	-	0	0	-	0	0	-	1	1	1	0	0	-
I	11232374	A-G	+	intron	Y53H1A.5	2	2	1	0	0	-	0	0	-	0	0	-	0	0	-	0	0	-	0	0	-	0	0	-	1	0	0	0	0	-
I	11232375	A-G	+	intron	Y53H1A.5	2	2	1	0	0	-	0	0	-	0	0	-	0	0	-	0	0	-	0	0	-	0	0	-	1	0	0	0	0	-
I	11232379	A-G	+	intron	Y53H1A.5	2	2	1	0	0	-	0	0	-	0	0	-	0	0	-	0	0	-	0	0	-	0	0	-	1	0	0	0	0	-
I	11232385	A-G	+	intron	Y53H1A.5	2	2	1	0	0	-	0	0	-	0	0	-	0	0	-	0	0	-	0	0	-	0	0	-	1	0	0	0	0	-
I	11232437	A-G	+	intron	Y53H1A.5	1	1	1	0	0	-	0	0	-	0	0	-	0	0	-	0	0	-	1	1	1	2	2	1	0	0	-	0	0	-
I	11232451	A-G	+	intron	Y53H1A.5	5	4	0.8	1	1	1	0	0	-	1	0	0	0	0	-	0	0	-	1	1	1	3	2	0.666667	0	0	-	0	0	-
I	11232454	A-G	+	intron	Y53H1A.5	5	0	0	2	1	0.5	0	0	-	1	0	0	0	0	-	0	0	-	1	0	0	3	3	1	0	0	-	0	0	-
I	11232474	A-G	+	intron	Y53H1A.5	5	3	0.6	2	1	0.5	0	0	-	1	0	0	0	0	-	0	0	-	2	1	0.5	3	3	1	0	0	-	0	0	-
I	11260331	A-G	+	antisense	F36D1.12;F36D1.8	0	0	-	0	0	-	0	0	-	0	0	-	0	0	-	2	2	1	0	0	-	0	0	-	0	0	-	0	0	-
I	11300712	A-G	+	upstream	Y53H1B.4	1	1	1	1	1	1	0	0	-	0	0	-	0	0	-	0	0	-	0	0	-	2	2	1	0	0	-	0	0	-
I	11300718	A-G	+	upstream	Y53H1B.4	1	1	1	1	1	1	0	0	-	0	0	-	0	0	-	0	0	-	0	0	-	3	1	0.333333	0	0	-	0	0	-
I	11300719	A-G	+	upstream	Y53H1B.4	1	1	1	1	1	1	0	0	-	0	0	-	0	0	-	0	0	-	0	0	-	4	3	0.75	0	0	-	0	0	-
I	11300722	A-G	+	upstream	Y53H1B.4	1	1	1	1	1	1	0	0	-	0	0	-	0	0	-	0	0	-	0	0	-	4	3	0.75	0	0	-	0	0	-
I	11300724	A-G	+	upstream	Y53H1B.4	1	1	1	1	1	1	0	0	-	0	0	-	0	0	-	0	0	-	0	0	-	4	0	0	0	0	-	0	0	-
I	11300734	A-G	+	upstream	Y53H1B.4	1	1	1	1	0	0	0	0	-	0	0	-	0	0	-	0	0	-	0	0	-	5	5	1	0	0	-	0	0	-
I	11300735	A-G	+	CDS	Y53H1B.4	2	2	1	1	1	1	0	0	-	0	0	-	0	0	-	0	0	-	0	0	-	5	5	1	0	0	-	0	0	-
I	11300752	A-G	+	CDS	Y53H1B.4	4	0	0	2	1	0.5	0	0	-	0	0	-	0	0	-	0	0	-	1	0	0	12	2	0.166667	0	0	-	0	0	-
I	11300764	A-G	+	CDS	Y53H1B.4	5	0	0	3	2	0.666667	0	0	-	0	0	-	0	0	-	0	0	-	2	0	0	15	4	0.266667	0	0	-	0	0	-
I	11300765	A-G	+	CDS	Y53H1B.4	5	0	0	3	2	0.666667	0	0	-	0	0	-	0	0	-	0	0	-	2	0	0	16	6	0.375	0	0	-	0	0	-
I	11300771	A-G	+	intron	Y53H1B.4	5	0	0	3	2	0.666667	0	0	-	0	0	-	0	0	-	0	0	-	2	0	0	18	4	0.222222	0	0	-	0	0	-
I	11301252	A-G	+	CDS	Y53H1B.4	0	0	-	2	2	1	0	0	-	0	0	-	0	0	-	0	0	-	1	0	0	4	1	0.25	0	0	-	0	0	-
I	11301257	A-G	+	CDS	Y53H1B.4	0	0	-	2	2	1	0	0	-	0	0	-	0	0	-	0	0	-	1	0	0	4	1	0.25	0	0	-	0	0	-
I	11301270	A-G	+	CDS	Y53H1B.4	0	0	-	1	1	1	0	0	-	0	0	-	0	0	-	0	0	-	1	0	0	5	2	0.4	0	0	-	0	0	-
I	11301271	A-G	+	CDS	Y53H1B.4	0	0	-	2	2	1	0	0	-	0	0	-	0	0	-	0	0	-	1	0	0	5	4	0.8	0	0	-	0	0	-
I	11301272	A-G	+	CDS	Y53H1B.4	0	0	-	2	2	1	0	0	-	0	0	-	0	0	-	0	0	-	1	0	0	5	4	0.8	0	0	-	0	0	-
I	11302190	A-G	+	upstream	H25P06.4;Y53H1B.6	0	0	-	0	0	-	0	0	-	0	0	-	0	0	-	0	0	-	0	0	-	2	2	1	0	0	-	0	0	-
I	11302196	A-G	+	upstream	H25P06.4;Y53H1B.6	0	0	-	0	0	-	0	0	-	0	0	-	0	0	-	0	0	-	0	0	-	2	2	1	0	0	-	0	0	-
I	11325628	A-G	+	intron	H25P06.2	0	0	-	2	2	1	0	0	-	0	0	-	0	0	-	0	0	-	0	0	-	0	0	-	0	0	-	0	0	-
I	11325632	A-G	+	intron	H25P06.2	0	0	-	2	2	1	0	0	-	0	0	-	0	0	-	0	0	-	0	0	-	0	0	-	0	0	-	0	0	-
I	11325633	A-G	+	intron	H25P06.2	0	0	-	2	2	1	0	0	-	0	0	-	0	0	-	0	0	-	0	0	-	0	0	-	0	0	-	0	0	-
I	11325637	A-G	+	intron	H25P06.2	0	0	-	2	2	1	0	0	-	0	0	-	0	0	-	0	0	-	0	0	-	0	0	-	0	0	-	0	0	-
I	11325638	A-G	+	intron	H25P06.2	0	0	-	2	2	1	0	0	-	0	0	-	0	0	-	0	0	-	0	0	-	0	0	-	0	0	-	0	0	-
I	11325677	A-G	+	intron	H25P06.2	0	0	-	3	3	1	0	0	-	0	0	-	0	0	-	0	0	-	0	0	-	0	0	-	0	0	-	0	0	-
I	11325679	A-G	+	intron	H25P06.2	0	0	-	3	2	0.666667	0	0	-	0	0	-	0	0	-	0	0	-	0	0	-	0	0	-	0	0	-	0	0	-
I	11325680	A-G	+	intron	H25P06.2	0	0	-	3	3	1	0	0	-	0	0	-	0	0	-	0	0	-	0	0	-	0	0	-	0	0	-	0	0	-
I	11354307	A-G	+	intron	null	1	0	0	0	0	-	0	0	-	0	0	-	0	0	-	2	2	1	0	0	-	1	1	1	0	0	-	0	0	-
I	11354321	A-G	+	intron	null	1	0	0	0	0	-	0	0	-	0	0	-	0	0	-	2	2	1	0	0	-	1	0	0	0	0	-	0	0	-
I	11354322	A-G	+	intron	null	1	1	1	0	0	-	0	0	-	0	0	-	0	0	-	2	2	1	0	0	-	1	1	1	0	0	-	0	0	-
I	11367218	A-G	-	intron	F56G4.6	3	1	0.333333	4	0	0	0	0	-	0	0	-	6	0	0	4	0	0	0	0	-	1	1	1	2	0	0	6	2	0.333333
I	11367232	A-G	-	intron	F56G4.6	3	1	0.333333	4	0	0	0	0	-	0	0	-	6	0	0	4	0	0	0	0	-	1	0	0	2	0	0	6	2	0.333333
I	11367562	A-G	-	intron	F56G4.6	1	0	0	1	1	1	1	0	0	1	1	1	0	0	-	1	0	0	2	0	0	2	0	0	0	0	-	0	0	-
I	11367599	A-G	-	intron	F56G4.6	4	1	0.25	5	1	0.2	1	0	0	1	0	0	0	0	-	3	0	0	1	1	1	4	0	0	0	0	-	2	0	0
I	11367733	A-G	-	intron	F56G4.6	3	1	0.333333	9	0	0	0	0	-	1	0	0	0	0	-	3	1	0.333333	0	0	-	4	2	0.5	0	0	-	4	2	0.5
I	11367734	A-G	-	intron	F56G4.6	3	0	0	9	1	0.111111	0	0	-	1	0	0	0	0	-	3	1	0.333333	0	0	-	4	2	0.5	0	0	-	4	3	0.75
I	11367735	A-G	-	intron	F56G4.6	3	0	0	9	1	0.111111	0	0	-	1	0	0	0	0	-	3	1	0.333333	0	0	-	4	1	0.25	0	0	-	4	1	0.25
I	11367736	A-G	-	intron	F56G4.6	3	1	0.333333	9	2	0.222222	0	0	-	1	0	0	0	0	-	3	2	0.666667	0	0	-	4	0	0	0	0	-	4	3	0.75
I	11367739	A-G	-	intron	F56G4.6	3	0	0	9	2	0.222222	0	0	-	1	0	0	0	0	-	3	1	0.333333	0	0	-	4	1	0.25	0	0	-	4	0	0
I	11367771	A-G	-	intron	F56G4.6	1	0	0	7	2	0.285714	0	0	-	0	0	-	0	0	-	3	1	0.333333	0	0	-	4	1	0.25	0	0	-	4	2	0.5
I	11367782	A-G	-	intron	F56G4.6	1	0	0	5	0	0	0	0	-	1	0	0	0	0	-	2	1	0.5	0	0	-	4	0	0	0	0	-	3	2	0.666667
I	11367791	A-G	-	intron	F56G4.6	0	0	-	4	1	0.25	0	0	-	1	0	0	0	0	-	1	1	1	0	0	-	3	0	0	0	0	-	2	2	1
I	11367792	A-G	-	intron	F56G4.6	0	0	-	4	2	0.5	0	0	-	1	0	0	0	0	-	1	1	1	0	0	-	4	3	0.75	0	0	-	2	2	1
I	1138296	A-G	-	intron	Y48G8AL.10;Y48G8AL.9	1	0	0	5	2	0.4	0	0	-	0	0	-	0	0	-	0	0	-	0	0	-	5	2	0.4	0	0	-	0	0	-
I	1138300	A-G	-	intron	Y48G8AL.10;Y48G8AL.9	1	0	0	5	1	0.2	0	0	-	0	0	-	0	0	-	0	0	-	0	0	-	5	3	0.6	0	0	-	0	0	-
I	1138301	A-G	-	intron	Y48G8AL.10;Y48G8AL.9	1	1	1	5	2	0.4	0	0	-	0	0	-	0	0	-	0	0	-	0	0	-	5	5	1	0	0	-	0	0	-
I	1138302	A-G	-	intron	Y48G8AL.10;Y48G8AL.9	1	0	0	5	3	0.6	0	0	-	0	0	-	0	0	-	0	0	-	0	0	-	5	1	0.2	0	0	-	0	0	-
I	1138308	A-G	-	intron	Y48G8AL.10;Y48G8AL.9	1	0	0	5	0	0	0	0	-	0	0	-	0	0	-	0	0	-	0	0	-	5	2	0.4	0	0	-	0	0	-
I	1138311	A-G	-	intron	Y48G8AL.10;Y48G8AL.9	1	0	0	5	3	0.6	0	0	-	0	0	-	0	0	-	0	0	-	0	0	-	5	0	0	0	0	-	0	0	-
I	1138327	A-G	-	intron	Y48G8AL.10;Y48G8AL.9	1	0	0	4	4	1	0	0	-	0	0	-	0	0	-	0	0	-	0	0	-	4	2	0.5	0	0	-	0	0	-
I	1138329	A-G	-	intron	Y48G8AL.10;Y48G8AL.9	1	1	1	4	3	0.75	0	0	-	0	0	-	0	0	-	0	0	-	0	0	-	4	2	0.5	0	0	-	0	0	-
I	1138331	A-G	-	intron	Y48G8AL.10;Y48G8AL.9	1	1	1	4	2	0.5	0	0	-	0	0	-	0	0	-	0	0	-	0	0	-	4	2	0.5	0	0	-	0	0	-
I	1138332	A-G	-	intron	Y48G8AL.10;Y48G8AL.9	1	1	1	4	4	1	0	0	-	0	0	-	0	0	-	0	0	-	0	0	-	4	4	1	0	0	-	0	0	-
I	1138339	A-G	-	intron	Y48G8AL.10;Y48G8AL.9	1	0	0	4	2	0.5	0	0	-	0	0	-	0	0	-	0	0	-	0	0	-	4	1	0.25	0	0	-	0	0	-
I	1138340	A-G	-	intron	Y48G8AL.10;Y48G8AL.9	1	0	0	4	2	0.5	0	0	-	0	0	-	0	0	-	0	0	-	0	0	-	4	0	0	0	0	-	0	0	-
I	1138345	A-G	-	intron	Y48G8AL.10;Y48G8AL.9	1	0	0	4	3	0.75	0	0	-	0	0	-	0	0	-	0	0	-	0	0	-	3	3	1	0	0	-	0	0	-
I	1138353	A-G	-	intron	Y48G8AL.10;Y48G8AL.9	1	1	1	3	3	1	0	0	-	0	0	-	0	0	-	0	0	-	0	0	-	3	1	0.333333	0	0	-	0	0	-
I	1138355	A-G	-	intron	Y48G8AL.10;Y48G8AL.9	1	0	0	3	2	0.666667	0	0	-	0	0	-	0	0	-	0	0	-	0	0	-	3	1	0.333333	0	0	-	0	0	-
I	1138362	A-G	-	intron	Y48G8AL.10;Y48G8AL.9	1	0	0	3	2	0.666667	0	0	-	0	0	-	0	0	-	0	0	-	0	0	-	2	1	0.5	0	0	-	0	0	-
I	1138365	A-G	-	intron	Y48G8AL.10;Y48G8AL.9	1	0	0	3	3	1	0	0	-	0	0	-	0	0	-	0	0	-	0	0	-	1	0	0	0	0	-	0	0	-
I	1138381	A-G	-	intron	Y48G8AL.10;Y48G8AL.9	1	0	0	2	2	1	0	0	-	0	0	-	0	0	-	0	0	-	0	0	-	1	1	1	0	0	-	0	0	-
I	1138388	A-G	-	intron	Y48G8AL.10;Y48G8AL.9	1	0	0	2	2	1	0	0	-	0	0	-	0	0	-	0	0	-	0	0	-	2	1	0.5	0	0	-	0	0	-
I	1138442	A-G	-	intron	Y48G8AL.10;Y48G8AL.9	1	1	1	1	1	1	0	0	-	0	0	-	0	0	-	0	0	-	0	0	-	1	1	1	0	0	-	0	0	-
I	1138602	A-G	-	intron	Y48G8AL.10;Y48G8AL.9	0	0	-	4	3	0.75	1	1	1	0	0	-	0	0	-	0	0	-	0	0	-	5	2	0.4	1	1	1	0	0	-
I	1138603	A-G	-	intron	Y48G8AL.10;Y48G8AL.9	0	0	-	4	3	0.75	1	1	1	0	0	-	0	0	-	0	0	-	0	0	-	5	3	0.6	1	1	1	0	0	-
I	1138607	A-G	-	intron	Y48G8AL.10;Y48G8AL.9	0	0	-	4	2	0.5	1	0	0	0	0	-	0	0	-	0	0	-	0	0	-	5	3	0.6	1	0	0	0	0	-
I	1138608	A-G	-	intron	Y48G8AL.10;Y48G8AL.9	0	0	-	4	4	1	1	0	0	0	0	-	0	0	-	0	0	-	0	0	-	5	5	1	1	1	1	0	0	-
I	1138617	A-G	-	intron	Y48G8AL.10;Y48G8AL.9	0	0	-	4	1	0.25	1	0	0	0	0	-	0	0	-	0	0	-	0	0	-	5	1	0.2	1	1	1	0	0	-
I	1138618	A-G	-	intron	Y48G8AL.10;Y48G8AL.9	0	0	-	4	2	0.5	1	0	0	0	0	-	0	0	-	0	0	-	0	0	-	5	3	0.6	1	1	1	0	0	-
I	1138623	A-G	-	intron	Y48G8AL.10;Y48G8AL.9	0	0	-	4	3	0.75	1	0	0	0	0	-	0	0	-	0	0	-	0	0	-	5	4	0.8	1	0	0	0	0	-
I	1138627	A-G	-	intron	Y48G8AL.10;Y48G8AL.9	0	0	-	4	3	0.75	1	0	0	0	0	-	0	0	-	0	0	-	0	0	-	5	2	0.4	0	0	-	0	0	-
I	1138630	A-G	-	intron	Y48G8AL.10;Y48G8AL.9	0	0	-	4	4	1	1	1	1	0	0	-	0	0	-	0	0	-	0	0	-	5	5	1	0	0	-	0	0	-
I	1138631	A-G	-	intron	Y48G8AL.10;Y48G8AL.9	0	0	-	4	4	1	1	1	1	0	0	-	0	0	-	0	0	-	0	0	-	4	4	1	0	0	-	0	0	-
I	1138641	A-G	-	intron	Y48G8AL.10;Y48G8AL.9	0	0	-	4	4	1	1	1	1	0	0	-	0	0	-	0	0	-	0	0	-	5	5	1	0	0	-	0	0	-
I	1138642	A-G	-	intron	Y48G8AL.10;Y48G8AL.9	0	0	-	4	4	1	1	1	1	0	0	-	0	0	-	0	0	-	0	0	-	5	2	0.4	0	0	-	0	0	-
I	1138646	A-G	-	intron	Y48G8AL.10;Y48G8AL.9	0	0	-	4	4	1	1	1	1	0	0	-	0	0	-	0	0	-	0	0	-	5	5	1	1	0	0	0	0	-
I	1138647	A-G	-	intron	Y48G8AL.10;Y48G8AL.9	0	0	-	4	4	1	1	1	1	0	0	-	0	0	-	0	0	-	0	0	-	5	5	1	1	0	0	0	0	-
I	1138651	A-G	-	intron	Y48G8AL.10;Y48G8AL.9	0	0	-	4	2	0.5	1	0	0	0	0	-	0	0	-	0	0	-	0	0	-	5	3	0.6	1	0	0	0	0	-
I	1138656	A-G	-	intron	Y48G8AL.10;Y48G8AL.9	0	0	-	4	4	1	1	1	1	0	0	-	0	0	-	0	0	-	0	0	-	5	5	1	1	1	1	0	0	-
I	1138661	A-G	-	intron	Y48G8AL.10;Y48G8AL.9	0	0	-	4	4	1	1	1	1	0	0	-	0	0	-	0	0	-	0	0	-	5	0	0	1	1	1	0	0	-
I	1138662	A-G	-	intron	Y48G8AL.10;Y48G8AL.9	0	0	-	4	2	0.5	1	1	1	0	0	-	0	0	-	0	0	-	0	0	-	5	0	0	1	1	1	0	0	-
I	1138663	A-G	-	intron	Y48G8AL.10;Y48G8AL.9	0	0	-	4	1	0.25	1	0	0	0	0	-	0	0	-	0	0	-	0	0	-	5	4	0.8	1	0	0	0	0	-
I	1138664	A-G	-	intron	Y48G8AL.10;Y48G8AL.9	0	0	-	4	3	0.75	1	0	0	0	0	-	0	0	-	0	0	-	0	0	-	5	3	0.6	1	0	0	0	0	-
I	1138672	A-G	-	intron	Y48G8AL.10;Y48G8AL.9	0	0	-	4	0	0	1	0	0	0	0	-	0	0	-	0	0	-	0	0	-	5	2	0.4	1	0	0	0	0	-
I	1138673	A-G	-	intron	Y48G8AL.10;Y48G8AL.9	0	0	-	4	2	0.5	1	0	0	0	0	-	0	0	-	0	0	-	0	0	-	5	1	0.2	1	1	1	0	0	-
I	1138678	A-G	-	intron	Y48G8AL.10;Y48G8AL.9	0	0	-	4	4	1	1	1	1	0	0	-	0	0	-	0	0	-	0	0	-	3	3	1	1	1	1	0	0	-
I	1138679	A-G	-	intron	Y48G8AL.10;Y48G8AL.9	0	0	-	4	4	1	1	1	1	0	0	-	0	0	-	0	0	-	0	0	-	3	1	0.333333	1	0	0	0	0	-
I	1138683	A-G	-	intron	Y48G8AL.10;Y48G8AL.9	0	0	-	4	0	0	1	0	0	0	0	-	0	0	-	0	0	-	0	0	-	3	2	0.666667	1	1	1	0	0	-
I	1138692	A-G	-	intron	Y48G8AL.10;Y48G8AL.9	0	0	-	4	2	0.5	1	1	1	0	0	-	0	0	-	0	0	-	0	0	-	3	0	0	1	0	0	0	0	-
I	1138696	A-G	-	intron	Y48G8AL.10;Y48G8AL.9	0	0	-	4	3	0.75	1	0	0	0	0	-	0	0	-	0	0	-	0	0	-	3	2	0.666667	1	0	0	0	0	-
I	1138702	A-G	-	intron	Y48G8AL.10;Y48G8AL.9	0	0	-	4	2	0.5	1	1	1	0	0	-	0	0	-	0	0	-	0	0	-	4	3	0.75	1	0	0	0	0	-
I	11387875	A-G	+	intron	F56G4.5	0	0	-	1	1	1	0	0	-	1	1	1	0	0	-	0	0	-	0	0	-	0	0	-	0	0	-	0	0	-
I	11390286	A-G	-	intron	Y53H1C.1	1	0	0	1	0	0	0	0	-	1	0	0	0	0	-	1	0	0	0	0	-	2	1	0.5	0	0	-	1	1	1
I	11390288	A-G	-	intron	Y53H1C.1	1	0	0	1	1	1	0	0	-	1	0	0	0	0	-	1	0	0	0	0	-	2	1	0.5	0	0	-	1	1	1
I	1139053	A-G	-	intron	Y48G8AL.10;Y48G8AL.9	1	1	1	1	1	1	0	0	-	0	0	-	0	0	-	0	0	-	0	0	-	1	1	1	0	0	-	0	0	-
I	1139058	A-G	-	intron	Y48G8AL.10;Y48G8AL.9	1	1	1	1	1	1	0	0	-	0	0	-	0	0	-	0	0	-	0	0	-	1	1	1	0	0	-	0	0	-
I	1139103	A-G	-	intron	Y48G8AL.10;Y48G8AL.9	1	1	1	1	1	1	0	0	-	0	0	-	0	0	-	0	0	-	0	0	-	1	1	1	0	0	-	0	0	-
I	1139106	A-G	-	intron	Y48G8AL.10;Y48G8AL.9	1	1	1	1	1	1	0	0	-	0	0	-	0	0	-	0	0	-	0	0	-	1	1	1	0	0	-	0	0	-
I	1139128	A-G	-	intron	Y48G8AL.10;Y48G8AL.9	1	1	1	1	1	1	0	0	-	0	0	-	0	0	-	0	0	-	0	0	-	1	1	1	0	0	-	0	0	-
I	1139161	A-G	-	intron	Y48G8AL.10;Y48G8AL.9	1	1	1	1	1	1	0	0	-	0	0	-	0	0	-	0	0	-	0	0	-	1	1	1	0	0	-	0	0	-
I	1139162	A-G	-	intron	Y48G8AL.10;Y48G8AL.9	1	1	1	1	1	1	0	0	-	0	0	-	0	0	-	0	0	-	0	0	-	1	1	1	0	0	-	0	0	-
I	1139182	A-G	-	intron	Y48G8AL.10;Y48G8AL.9	1	1	1	0	0	-	0	0	-	0	0	-	0	0	-	0	0	-	0	0	-	2	2	1	0	0	-	0	0	-
I	1139387	A-G	-	intron	Y48G8AL.10;Y48G8AL.9	1	0	0	0	0	-	0	0	-	0	0	-	0	0	-	0	0	-	0	0	-	0	0	-	1	1	1	1	1	1
I	1139397	A-G	-	intron	Y48G8AL.10;Y48G8AL.9	1	0	0	0	0	-	0	0	-	0	0	-	0	0	-	0	0	-	0	0	-	0	0	-	1	1	1	1	1	1
I	1139414	A-G	-	intron	Y48G8AL.10;Y48G8AL.9	1	1	1	0	0	-	0	0	-	0	0	-	0	0	-	0	0	-	0	0	-	0	0	-	1	1	1	1	1	1
I	1145407	A-G	-	intron	Y48G8AL.10	0	0	-	0	0	-	1	1	1	0	0	-	0	0	-	1	1	1	0	0	-	1	1	1	0	0	-	0	0	-
I	1145416	A-G	-	intron	Y48G8AL.10	0	0	-	0	0	-	1	1	1	0	0	-	0	0	-	1	1	1	0	0	-	1	0	0	0	0	-	0	0	-
I	1149056	A-G	-	intron	Y48G8AL.10	1	0	0	2	2	1	0	0	-	0	0	-	0	0	-	0	0	-	1	1	1	2	2	1	0	0	-	0	0	-
I	1149060	A-G	-	intron	Y48G8AL.10	1	1	1	2	0	0	0	0	-	0	0	-	0	0	-	0	0	-	1	1	1	2	1	0.5	0	0	-	0	0	-
I	1149061	A-G	-	intron	Y48G8AL.10	1	1	1	2	1	0.5	0	0	-	0	0	-	0	0	-	0	0	-	1	1	1	2	2	1	0	0	-	0	0	-
I	1149062	A-G	-	intron	Y48G8AL.10	1	0	0	2	1	0.5	0	0	-	0	0	-	0	0	-	0	0	-	1	1	1	2	2	1	0	0	-	0	0	-
I	1149069	A-G	-	intron	Y48G8AL.10	1	1	1	2	1	0.5	0	0	-	0	0	-	0	0	-	0	0	-	1	0	0	2	1	0.5	0	0	-	0	0	-
I	1149073	A-G	-	intron	Y48G8AL.10	1	0	0	2	2	1	0	0	-	0	0	-	0	0	-	0	0	-	1	1	1	2	0	0	0	0	-	0	0	-
I	1149078	A-G	-	intron	Y48G8AL.10	1	1	1	2	1	0.5	0	0	-	0	0	-	0	0	-	0	0	-	1	0	0	2	0	0	0	0	-	0	0	-
I	1149082	A-G	-	intron	Y48G8AL.10	1	0	0	2	2	1	0	0	-	0	0	-	0	0	-	0	0	-	1	0	0	2	0	0	0	0	-	0	0	-
I	1149083	A-G	-	intron	Y48G8AL.10	1	1	1	2	2	1	0	0	-	0	0	-	0	0	-	0	0	-	1	0	0	2	0	0	0	0	-	0	0	-
I	1149092	A-G	-	intron	Y48G8AL.10	1	1	1	2	2	1	0	0	-	0	0	-	0	0	-	0	0	-	1	1	1	2	2	1	0	0	-	0	0	-
I	1149093	A-G	-	intron	Y48G8AL.10	1	1	1	2	2	1	0	0	-	0	0	-	0	0	-	0	0	-	1	0	0	2	2	1	0	0	-	0	0	-
I	1149099	A-G	-	intron	Y48G8AL.10	1	1	1	2	2	1	0	0	-	0	0	-	0	0	-	0	0	-	1	0	0	2	0	0	0	0	-	0	0	-
I	1149100	A-G	-	intron	Y48G8AL.10	1	1	1	2	2	1	0	0	-	0	0	-	0	0	-	0	0	-	1	0	0	2	0	0	0	0	-	0	0	-
I	1149115	A-G	-	intron	Y48G8AL.10	1	1	1	2	2	1	0	0	-	0	0	-	0	0	-	0	0	-	1	0	0	2	2	1	0	0	-	0	0	-
I	1149120	A-G	-	intron	Y48G8AL.10	1	1	1	2	1	0.5	0	0	-	0	0	-	0	0	-	0	0	-	1	0	0	1	1	1	0	0	-	0	0	-
I	1149121	A-G	-	intron	Y48G8AL.10	1	1	1	2	1	0.5	0	0	-	0	0	-	0	0	-	0	0	-	1	0	0	1	1	1	0	0	-	0	0	-
I	1149122	A-G	-	intron	Y48G8AL.10	1	1	1	2	2	1	0	0	-	0	0	-	0	0	-	0	0	-	1	0	0	1	0	0	0	0	-	0	0	-
I	1149127	A-G	-	intron	Y48G8AL.10	1	1	1	2	1	0.5	0	0	-	0	0	-	0	0	-	0	0	-	1	0	0	1	1	1	0	0	-	0	0	-
I	1149133	A-G	-	intron	Y48G8AL.10	1	1	1	2	1	0.5	0	0	-	0	0	-	0	0	-	0	0	-	1	1	1	1	1	1	0	0	-	0	0	-
I	1149134	A-G	-	intron	Y48G8AL.10	1	0	0	2	1	0.5	0	0	-	0	0	-	0	0	-	0	0	-	1	1	1	1	1	1	0	0	-	0	0	-
I	1149149	A-G	-	intron	Y48G8AL.10	0	0	-	1	1	1	0	0	-	0	0	-	0	0	-	0	0	-	1	1	1	2	2	1	0	0	-	0	0	-
I	1149167	A-G	-	intron	Y48G8AL.10	1	1	1	2	2	1	0	0	-	0	0	-	0	0	-	0	0	-	1	1	1	2	2	1	0	0	-	0	0	-
I	1149182	A-G	-	intron	Y48G8AL.10	1	1	1	2	2	1	0	0	-	0	0	-	0	0	-	0	0	-	1	1	1	2	2	1	0	0	-	0	0	-
I	1149183	A-G	-	intron	Y48G8AL.10	1	1	1	2	2	1	0	0	-	0	0	-	0	0	-	0	0	-	1	0	0	2	1	0.5	0	0	-	0	0	-
I	1149184	A-G	-	intron	Y48G8AL.10	1	1	1	2	2	1	0	0	-	0	0	-	0	0	-	0	0	-	1	1	1	2	1	0.5	0	0	-	0	0	-
I	1149185	A-G	-	intron	Y48G8AL.10	1	0	0	2	0	0	0	0	-	0	0	-	0	0	-	0	0	-	1	0	0	2	2	1	0	0	-	0	0	-
I	1149186	A-G	-	intron	Y48G8AL.10	1	1	1	2	2	1	0	0	-	0	0	-	0	0	-	0	0	-	1	1	1	2	1	0.5	0	0	-	0	0	-
I	1149195	A-G	-	intron	Y48G8AL.10	1	1	1	2	2	1	0	0	-	0	0	-	0	0	-	0	0	-	1	0	0	2	1	0.5	0	0	-	0	0	-
I	1149196	A-G	-	intron	Y48G8AL.10	1	1	1	2	0	0	0	0	-	0	0	-	0	0	-	0	0	-	1	0	0	2	2	1	0	0	-	0	0	-
I	1149197	A-G	-	intron	Y48G8AL.10	1	1	1	2	0	0	0	0	-	0	0	-	0	0	-	0	0	-	1	0	0	2	2	1	0	0	-	0	0	-
I	1149204	A-G	-	intron	Y48G8AL.10	1	1	1	2	1	0.5	0	0	-	0	0	-	0	0	-	0	0	-	1	1	1	2	1	0.5	0	0	-	0	0	-
I	1149211	A-G	-	intron	Y48G8AL.10	1	1	1	2	2	1	0	0	-	0	0	-	0	0	-	0	0	-	1	0	0	2	2	1	0	0	-	0	0	-
I	1149212	A-G	-	intron	Y48G8AL.10	1	0	0	2	2	1	0	0	-	0	0	-	0	0	-	0	0	-	1	0	0	2	0	0	0	0	-	0	0	-
I	1149213	A-G	-	intron	Y48G8AL.10	1	1	1	2	2	1	0	0	-	0	0	-	0	0	-	0	0	-	1	1	1	2	2	1	0	0	-	0	0	-
I	1149214	A-G	-	intron	Y48G8AL.10	1	1	1	2	2	1	0	0	-	0	0	-	0	0	-	0	0	-	1	1	1	2	2	1	0	0	-	0	0	-
I	1149226	A-G	-	intron	Y48G8AL.10	1	1	1	2	2	1	0	0	-	0	0	-	0	0	-	0	0	-	1	1	1	1	1	1	0	0	-	0	0	-
I	1149232	A-G	-	intron	Y48G8AL.10	1	1	1	2	2	1	0	0	-	0	0	-	0	0	-	0	0	-	0	0	-	0	0	-	0	0	-	0	0	-
I	1149243	A-G	-	intron	Y48G8AL.10	1	1	1	2	1	0.5	0	0	-	0	0	-	0	0	-	0	0	-	0	0	-	0	0	-	0	0	-	0	0	-
I	1149244	A-G	-	intron	Y48G8AL.10	1	1	1	2	2	1	0	0	-	0	0	-	0	0	-	0	0	-	0	0	-	0	0	-	0	0	-	0	0	-
I	1149245	A-G	-	intron	Y48G8AL.10	1	1	1	1	1	1	0	0	-	0	0	-	0	0	-	0	0	-	0	0	-	0	0	-	0	0	-	0	0	-
I	11493497	A-G	-	intron	K08C9.8	0	0	-	2	2	1	1	1	1	0	0	-	0	0	-	0	0	-	0	0	-	0	0	-	0	0	-	0	0	-
I	11493503	A-G	-	intron	K08C9.8	0	0	-	2	2	1	1	0	0	0	0	-	0	0	-	0	0	-	0	0	-	0	0	-	0	0	-	0	0	-
I	11493520	A-G	-	intron	K08C9.8	0	0	-	2	2	1	1	0	0	0	0	-	0	0	-	0	0	-	0	0	-	0	0	-	0	0	-	0	0	-
I	11493537	A-G	-	intron	K08C9.8	0	0	-	2	2	1	1	1	1	0	0	-	0	0	-	0	0	-	0	0	-	0	0	-	0	0	-	0	0	-
I	115122	A-G	+	downstream	F53G12.8	0	0	-	0	0	-	0	0	-	1	1	1	1	1	1	0	0	-	0	0	-	0	0	-	0	0	-	0	0	-
I	115127	A-G	+	downstream	F53G12.8	0	0	-	0	0	-	0	0	-	1	1	1	1	1	1	0	0	-	0	0	-	0	0	-	0	0	-	0	0	-
I	115138	A-G	+	downstream	F53G12.8	0	0	-	0	0	-	0	0	-	1	1	1	1	1	1	0	0	-	0	0	-	0	0	-	0	0	-	0	0	-
I	115149	A-G	+	downstream/upstream	F53G12.7;F53G12.8	0	0	-	0	0	-	0	0	-	1	1	1	1	1	1	0	0	-	0	0	-	0	0	-	0	0	-	0	0	-
I	1154600	A-G	-	intron	null	192	20	0.104167	49	4	0.0816327	40	6	0.15	50	3	0.06	57	5	0.0877193	66	8	0.121212	77	1	0.012987	42	3	0.0714286	35	2	0.0571429	48	0	0
I	1154606	A-G	-	intron	null	277	188	0.6787	72	60	0.833333	45	28	0.622222	52	31	0.596154	64	29	0.453125	73	57	0.780822	85	34	0.4	56	32	0.571429	36	14	0.388889	55	10	0.181818
I	1154607	A-G	-	intron	null	281	6	0.0213523	72	5	0.0694444	45	0	0	52	2	0.0384615	64	2	0.03125	74	1	0.0135135	85	0	0	56	3	0.0535714	36	0	0	55	0	0
I	1154609	A-G	-	intron	null	284	264	0.929577	72	67	0.930556	45	39	0.866667	52	43	0.826923	65	56	0.861538	72	68	0.944444	85	49	0.576471	56	43	0.767857	36	21	0.583333	55	29	0.527273
I	1154636	A-G	-	intron	null	343	13	0.0379009	81	3	0.037037	48	1	0.0208333	53	1	0.0188679	70	3	0.0428571	82	4	0.0487805	89	2	0.0224719	57	4	0.0701754	37	1	0.027027	58	3	0.0517241
I	1154637	A-G	-	intron	null	344	7	0.0203488	82	4	0.0487805	49	3	0.0612245	52	0	0	70	2	0.0285714	82	4	0.0487805	89	3	0.0337079	58	3	0.0517241	38	3	0.0789474	58	1	0.0172414
I	1154647	A-G	-	intron	null	368	25	0.0679348	94	6	0.0638298	52	4	0.0769231	54	7	0.12963	75	5	0.0666667	83	5	0.060241	91	5	0.0549451	43	2	0.0465116	43	4	0.0930233	64	4	0.0625
I	1154648	A-G	-	intron	null	369	332	0.899729	94	87	0.925532	52	45	0.865385	55	51	0.927273	74	61	0.824324	83	78	0.939759	91	37	0.406593	38	21	0.552632	43	24	0.55814	64	26	0.40625
I	1154649	A-G	-	intron	null	368	112	0.304348	94	34	0.361702	52	13	0.25	55	16	0.290909	74	17	0.22973	83	30	0.361446	91	8	0.0879121	35	5	0.142857	43	3	0.0697674	63	2	0.031746
I	1154653	A-G	-	intron	null	371	315	0.849057	94	83	0.882979	51	42	0.823529	55	47	0.854545	73	59	0.808219	84	74	0.880952	90	59	0.655556	42	32	0.761905	44	28	0.636364	66	42	0.636364
I	1154654	A-G	-	intron	null	371	185	0.498652	91	49	0.538462	50	25	0.5	51	31	0.607843	70	35	0.5	83	44	0.53012	86	20	0.232558	41	15	0.365854	43	14	0.325581	63	20	0.31746
I	1154657	A-G	-	intron	null	384	58	0.151042	99	19	0.191919	53	7	0.132075	53	6	0.113208	70	7	0.1	84	15	0.178571	93	7	0.0752688	43	6	0.139535	40	7	0.175	73	5	0.0684932
I	1154658	A-G	-	intron	null	384	54	0.140625	99	24	0.242424	54	8	0.148148	53	8	0.150943	66	8	0.121212	81	14	0.17284	92	1	0.0108696	44	1	0.0227273	41	0	0	72	3	0.0416667
I	1154659	A-G	-	intron	null	390	86	0.220513	99	27	0.272727	55	6	0.109091	54	10	0.185185	70	8	0.114286	82	18	0.219512	96	6	0.0625	44	3	0.0681818	40	0	0	73	6	0.0821918
I	1154661	A-G	-	intron	null	392	13	0.0331633	99	6	0.0606061	53	2	0.0377358	56	0	0	73	3	0.0410959	81	0	0	96	6	0.0625	44	2	0.0454545	43	0	0	74	2	0.027027
I	1154662	A-G	-	intron	null	399	9	0.0225564	103	7	0.0679612	55	1	0.0181818	55	0	0	75	2	0.0266667	82	6	0.0731707	97	0	0	46	1	0.0217391	45	0	0	76	0	0
I	1154663	A-G	-	intron	null	409	139	0.339853	106	35	0.330189	55	18	0.327273	57	17	0.298246	79	25	0.316456	82	28	0.341463	101	14	0.138614	49	10	0.204082	47	6	0.12766	79	2	0.0253165
I	1154664	A-G	-	intron	null	414	22	0.0531401	109	14	0.12844	55	0	0	58	0	0	80	3	0.0375	87	6	0.0689655	101	0	0	53	2	0.0377358	48	0	0	83	0	0
I	1154672	A-G	-	intron	null	484	18	0.0371901	125	4	0.032	58	2	0.0344828	62	0	0	92	1	0.0108696	95	6	0.0631579	110	2	0.0181818	64	3	0.046875	62	1	0.016129	88	0	0
I	1154673	A-G	-	intron	null	486	18	0.037037	130	14	0.107692	59	2	0.0338983	63	1	0.015873	92	5	0.0543478	98	7	0.0714286	111	2	0.018018	67	0	0	63	1	0.015873	89	0	0
I	1154674	A-G	-	intron	null	489	109	0.222904	130	38	0.292308	60	9	0.15	64	12	0.1875	93	19	0.204301	97	28	0.28866	111	6	0.0540541	67	13	0.19403	63	4	0.0634921	89	4	0.0449438
I	1154675	A-G	-	intron	null	493	15	0.030426	129	3	0.0232558	60	2	0.0333333	64	1	0.015625	93	5	0.0537634	98	3	0.0306122	111	0	0	67	0	0	63	0	0	91	0	0
I	1154677	A-G	-	intron	null	515	251	0.487379	135	71	0.525926	61	24	0.393443	66	20	0.30303	101	39	0.386139	102	50	0.490196	115	12	0.104348	69	21	0.304348	67	13	0.19403	96	16	0.166667
I	1154678	A-G	-	intron	null	520	21	0.0403846	136	13	0.0955882	62	3	0.0483871	66	1	0.0151515	103	3	0.0291262	102	7	0.0686275	116	1	0.00862069	68	2	0.0294118	70	1	0.0142857	97	1	0.0103093
I	1154684	A-G	-	intron	null	537	7	0.0130354	139	3	0.0215827	64	2	0.03125	67	1	0.0149254	106	0	0	103	0	0	119	0	0	67	5	0.0746269	71	0	0	101	0	0
I	1154686	A-G	-	intron	null	540	66	0.122222	140	21	0.15	64	8	0.125	67	4	0.0597015	106	12	0.113208	102	13	0.127451	119	3	0.0252101	68	4	0.0588235	70	2	0.0285714	101	4	0.039604
I	1154704	A-G	-	intron	null	688	121	0.175872	211	38	0.180095	119	17	0.142857	100	14	0.14	159	15	0.0943396	143	29	0.202797	166	4	0.0240964	103	1	0.00970874	129	0	0	146	2	0.0136986
I	1154705	A-G	-	intron	null	690	188	0.272464	215	50	0.232558	120	21	0.175	100	20	0.2	158	27	0.170886	141	52	0.368794	167	3	0.0179641	104	6	0.0576923	129	3	0.0232558	147	2	0.0136054
I	1154706	A-G	-	intron	null	689	188	0.272859	216	60	0.277778	120	28	0.233333	101	13	0.128713	161	42	0.26087	143	53	0.370629	167	12	0.0718563	104	15	0.144231	128	3	0.0234375	147	5	0.0340136
I	1154709	A-G	-	intron	null	695	12	0.0172662	218	3	0.0137615	121	4	0.0330579	101	0	0	161	3	0.0186335	143	4	0.027972	169	1	0.00591716	105	6	0.0571429	131	1	0.00763359	148	1	0.00675676
I	1154711	A-G	-	intron	null	702	586	0.834758	215	178	0.827907	121	103	0.85124	98	79	0.806122	162	135	0.833333	142	119	0.838028	171	137	0.80117	108	94	0.87037	131	110	0.839695	149	131	0.879195
I	1154712	A-G	-	intron	null	706	665	0.941926	216	204	0.944444	119	103	0.865546	100	88	0.88	164	153	0.932927	142	133	0.93662	171	161	0.94152	109	106	0.972477	132	126	0.954545	148	139	0.939189
I	1154714	A-G	-	intron	null	711	299	0.420534	217	105	0.483871	122	56	0.459016	100	48	0.48	165	71	0.430303	144	59	0.409722	169	15	0.0887574	111	16	0.144144	133	11	0.0827068	151	15	0.0993377
I	1154715	A-G	-	intron	null	710	710	1	218	218	1	121	121	1	100	100	1	165	165	1	144	144	1	170	166	0.976471	112	112	1	132	131	0.992424	151	149	0.986755
I	1154728	A-G	-	intron	null	712	195	0.273876	220	73	0.331818	122	24	0.196721	99	23	0.232323	163	45	0.276074	145	51	0.351724	168	32	0.190476	113	36	0.318584	132	20	0.151515	150	26	0.173333
I	1154739	A-G	-	intron	null	705	64	0.0907801	220	15	0.0681818	119	6	0.0504202	96	4	0.0416667	166	6	0.0361446	140	14	0.1	167	2	0.011976	112	3	0.0267857	131	2	0.0152672	143	5	0.034965
I	1154749	A-G	-	intron	null	677	270	0.398818	210	72	0.342857	105	36	0.342857	80	23	0.2875	154	53	0.344156	118	57	0.483051	144	12	0.0833333	99	25	0.252525	127	24	0.188976	126	15	0.119048
I	1154757	A-G	-	intron	null	642	11	0.017134	201	10	0.0497512	94	0	0	63	0	0	138	4	0.0289855	102	3	0.0294118	124	0	0	83	0	0	118	0	0	119	1	0.00840336
I	1154758	A-G	-	intron	null	643	29	0.0451011	200	18	0.09	93	5	0.0537634	63	0	0	137	5	0.0364964	100	9	0.09	126	4	0.031746	83	10	0.120482	119	7	0.0588235	119	6	0.0504202
I	1154772	A-G	-	intron	null	610	34	0.0557377	194	13	0.0670103	86	5	0.0581395	58	5	0.0862069	123	9	0.0731707	89	7	0.0786517	116	2	0.0172414	78	8	0.102564	105	3	0.0285714	114	2	0.0175439
I	1154773	A-G	-	intron	null	606	40	0.0660066	193	16	0.0829016	85	4	0.0470588	57	4	0.0701754	121	9	0.0743802	88	6	0.0681818	115	2	0.0173913	76	6	0.0789474	105	5	0.047619	112	2	0.0178571
I	1154777	A-G	-	intron	null	576	186	0.322917	185	63	0.340541	83	26	0.313253	55	21	0.381818	114	40	0.350877	79	28	0.35443	109	9	0.0825688	73	15	0.205479	103	12	0.116505	106	17	0.160377
I	1154779	A-G	-	intron	null	566	34	0.0600707	180	17	0.0944444	83	8	0.0963855	56	1	0.0178571	112	7	0.0625	80	9	0.1125	109	1	0.00917431	72	9	0.125	104	2	0.0192308	105	1	0.00952381
I	1154780	A-G	-	intron	null	568	33	0.0580986	180	16	0.0888889	83	5	0.060241	58	4	0.0689655	113	7	0.0619469	81	5	0.0617284	109	3	0.0275229	72	12	0.166667	104	4	0.0384615	104	9	0.0865385
I	1154792	A-G	-	intron	null	550	38	0.0690909	175	20	0.114286	82	7	0.0853659	54	4	0.0740741	115	9	0.0782609	78	7	0.0897436	104	2	0.0192308	38	1	0.0263158	115	1	0.00869565	103	1	0.00970874
I	1154798	A-G	-	intron	null	540	166	0.307407	163	61	0.374233	72	21	0.291667	46	10	0.217391	104	32	0.307692	68	26	0.382353	91	6	0.0659341	36	1	0.0277778	120	8	0.0666667	97	3	0.0309278
I	1154813	A-G	-	intron	null	531	94	0.177024	168	35	0.208333	82	19	0.231707	50	9	0.18	120	13	0.108333	72	22	0.305556	99	9	0.0909091	44	13	0.295455	140	15	0.107143	105	13	0.12381
I	1154818	A-G	-	intron	null	515	67	0.130097	167	27	0.161677	80	11	0.1375	54	11	0.203704	121	19	0.157025	71	14	0.197183	100	7	0.07	51	4	0.0784314	143	11	0.0769231	106	5	0.0471698
I	1154821	A-G	-	intron	null	509	28	0.0550098	166	13	0.0783133	80	6	0.075	52	9	0.173077	120	8	0.0666667	71	9	0.126761	100	0	0	57	1	0.0175439	144	0	0	109	0	0
I	1154825	A-G	-	intron	null	499	360	0.721443	164	124	0.756098	78	57	0.730769	50	40	0.8	120	96	0.8	68	54	0.794118	100	73	0.73	56	46	0.821429	142	115	0.809859	103	88	0.854369
I	1154826	A-G	-	intron	null	500	456	0.912	163	144	0.883436	79	73	0.924051	52	50	0.961538	120	110	0.916667	67	61	0.910448	101	76	0.752475	55	48	0.872727	141	116	0.822695	104	84	0.807692
I	1154843	A-G	-	intron	null	456	357	0.782895	145	122	0.841379	77	62	0.805195	52	41	0.788462	114	82	0.719298	62	60	0.967742	94	67	0.712766	54	43	0.796296	133	80	0.601504	97	68	0.701031
I	1154848	A-G	-	intron	null	433	140	0.323326	142	53	0.373239	74	29	0.391892	51	20	0.392157	112	38	0.339286	55	25	0.454545	88	31	0.352273	54	25	0.462963	128	41	0.320312	91	26	0.285714
I	1154849	A-G	-	intron	null	428	141	0.329439	139	66	0.47482	73	29	0.39726	50	18	0.36	110	38	0.345455	55	26	0.472727	87	23	0.264368	54	18	0.333333	129	24	0.186047	93	19	0.204301
I	1154850	A-G	-	intron	null	425	46	0.108235	137	27	0.19708	73	10	0.136986	50	4	0.08	112	11	0.0982143	54	11	0.203704	87	4	0.045977	54	8	0.148148	127	5	0.0393701	91	5	0.0549451
I	1154851	A-G	-	intron	null	428	69	0.161215	137	23	0.167883	73	13	0.178082	50	6	0.12	113	18	0.159292	56	16	0.285714	87	0	0	53	3	0.0566038	128	2	0.015625	90	4	0.0444444
I	1154861	A-G	-	intron	null	369	40	0.108401	122	22	0.180328	65	8	0.123077	46	11	0.23913	101	5	0.049505	52	11	0.211538	75	9	0.12	45	9	0.2	118	9	0.0762712	75	6	0.08
I	1154864	A-G	-	intron	null	354	69	0.194915	119	39	0.327731	65	18	0.276923	43	13	0.302326	99	22	0.222222	51	20	0.392157	70	3	0.0428571	47	9	0.191489	119	6	0.0504202	75	6	0.08
I	1154866	A-G	-	intron	null	354	343	0.968927	118	117	0.991525	65	60	0.923077	44	44	1	98	96	0.979592	50	50	1	71	68	0.957746	46	46	1	119	119	1	77	77	1
I	1154868	A-G	-	intron	null	350	55	0.157143	117	12	0.102564	64	5	0.078125	44	4	0.0909091	98	6	0.0612245	50	16	0.32	71	2	0.028169	46	4	0.0869565	118	9	0.0762712	76	3	0.0394737
I	1154870	A-G	-	intron	null	339	10	0.0294985	116	6	0.0517241	62	1	0.016129	43	2	0.0465116	95	1	0.0105263	49	1	0.0204082	69	4	0.057971	46	8	0.173913	117	5	0.042735	76	6	0.0789474
I	1154873	A-G	-	intron	null	332	15	0.0451807	112	15	0.133929	61	4	0.0655738	42	2	0.047619	93	5	0.0537634	46	0	0	67	8	0.119403	41	3	0.0731707	114	10	0.0877193	73	10	0.136986
I	1154876	A-G	-	intron	null	303	128	0.422442	100	51	0.51	56	29	0.517857	38	21	0.552632	88	33	0.375	43	26	0.604651	65	29	0.446154	39	25	0.641026	103	45	0.436893	66	25	0.378788
I	1154877	A-G	-	intron	null	297	34	0.114478	98	18	0.183673	55	6	0.109091	38	8	0.210526	87	7	0.0804598	41	5	0.121951	65	26	0.4	39	27	0.692308	100	31	0.31	64	22	0.34375
I	1154881	A-G	-	intron	null	278	248	0.892086	90	78	0.866667	46	43	0.934783	35	31	0.885714	83	72	0.86747	38	35	0.921053	61	10	0.163934	36	4	0.111111	95	12	0.126316	60	12	0.2
I	1154882	A-G	-	intron	null	272	167	0.613971	88	57	0.647727	43	30	0.697674	35	22	0.628571	81	54	0.666667	36	24	0.666667	59	3	0.0508475	35	0	0	94	1	0.0106383	57	3	0.0526316
I	1154884	A-G	-	intron	null	259	21	0.0810811	86	7	0.0813953	41	4	0.097561	34	1	0.0294118	77	6	0.0779221	34	5	0.147059	58	1	0.0172414	36	4	0.111111	89	2	0.0224719	57	1	0.0175439
I	1154890	A-G	-	intron	null	236	0	0	77	0	0	35	0	0	32	0	0	72	0	0	27	0	0	52	0	0	32	2	0.0625	84	0	0	47	1	0.0212766
I	1154894	A-G	-	intron	null	219	110	0.502283	75	52	0.693333	30	17	0.566667	30	20	0.666667	67	41	0.61194	28	20	0.714286	46	6	0.130435	29	9	0.310345	82	7	0.0853659	43	6	0.139535
I	1154897	A-G	-	intron	null	203	10	0.0492611	67	2	0.0298507	25	2	0.08	27	3	0.111111	59	3	0.0508475	24	4	0.166667	43	0	0	28	2	0.0714286	76	3	0.0394737	41	4	0.097561
I	1154898	A-G	-	intron	null	205	19	0.0926829	68	4	0.0588235	25	4	0.16	26	1	0.0384615	58	2	0.0344828	23	1	0.0434783	42	0	0	28	2	0.0714286	75	3	0.04	41	2	0.0487805
I	1154900	A-G	-	intron	null	198	25	0.126263	66	11	0.166667	23	4	0.173913	23	3	0.130435	55	3	0.0545455	23	4	0.173913	40	0	0	26	3	0.115385	79	1	0.0126582	40	0	0
I	1154903	A-G	-	intron	null	180	91	0.505556	60	31	0.516667	19	12	0.631579	21	12	0.571429	50	14	0.28	20	11	0.55	34	2	0.0588235	20	10	0.5	74	12	0.162162	34	7	0.205882
I	1154915	A-G	-	intron	null	132	36	0.272727	35	17	0.485714	7	5	0.714286	7	1	0.142857	27	10	0.37037	6	0	0	16	1	0.0625	4	2	0.5	47	2	0.0425532	24	2	0.0833333
I	1154924	A-G	-	intron	null	134	6	0.0447761	35	2	0.0571429	7	0	0	7	0	0	27	1	0.037037	5	0	0	15	3	0.2	3	0	0	47	4	0.0851064	24	1	0.0416667
I	1154925	A-G	-	intron	null	132	12	0.0909091	34	6	0.176471	7	1	0.142857	7	1	0.142857	26	3	0.115385	5	0	0	15	7	0.466667	3	3	1	48	12	0.25	24	10	0.416667
I	1154926	A-G	-	intron	null	129	108	0.837209	35	30	0.857143	7	6	0.857143	7	7	1	26	24	0.923077	5	4	0.8	15	10	0.666667	3	3	1	48	30	0.625	24	15	0.625
I	1154934	A-G	-	intron	null	126	3	0.0238095	33	4	0.121212	7	0	0	5	0	0	25	1	0.04	3	0	0	15	1	0.0666667	3	0	0	47	2	0.0425532	24	1	0.0416667
I	1154940	A-G	-	intron	null	122	16	0.131148	32	8	0.25	7	3	0.428571	5	1	0.2	24	9	0.375	4	0	0	14	0	0	3	1	0.333333	47	2	0.0425532	24	1	0.0416667
I	1154941	A-G	-	intron	null	123	14	0.113821	31	3	0.0967742	7	2	0.285714	5	0	0	23	6	0.26087	4	1	0.25	14	0	0	3	2	0.666667	48	0	0	24	0	0
I	1154988	A-G	-	intron	null	47	16	0.340426	13	4	0.307692	2	0	0	3	1	0.333333	17	5	0.294118	2	2	1	8	0	0	1	1	1	29	4	0.137931	13	2	0.153846
I	1154989	A-G	-	intron	null	45	15	0.333333	12	4	0.333333	2	1	0.5	3	2	0.666667	16	4	0.25	2	0	0	8	2	0.25	1	1	1	27	5	0.185185	11	2	0.181818
I	1154990	A-G	-	intron	null	43	36	0.837209	12	8	0.666667	2	2	1	3	3	1	16	14	0.875	2	2	1	8	6	0.75	1	1	1	26	17	0.653846	13	9	0.692308
I	1154991	A-G	-	intron	null	38	2	0.0526316	9	0	0	2	0	0	3	0	0	16	0	0	2	0	0	7	0	0	1	0	0	22	0	0	12	1	0.0833333
I	1154999	A-G	-	intron	null	13	9	0.692308	1	1	1	0	0	-	2	1	0.5	8	6	0.75	2	2	1	6	3	0.5	0	0	-	11	5	0.454545	9	2	0.222222
I	1155000	A-G	-	intron	null	13	13	1	0	0	-	0	0	-	2	2	1	8	8	1	2	2	1	6	6	1	0	0	-	11	11	1	9	9	1
I	1155008	A-G	-	intron	null	9	0	0	0	0	-	0	0	-	2	0	0	5	0	0	2	0	0	5	1	0.2	0	0	-	9	2	0.222222	6	2	0.333333
I	1155009	A-G	-	intron	null	7	0	0	0	0	-	0	0	-	2	0	0	4	0	0	2	0	0	5	0	0	0	0	-	6	0	0	6	2	0.333333
I	1155023	A-G	-	intron	null	109	5	0.0458716	32	5	0.15625	29	3	0.103448	9	0	0	42	2	0.047619	16	1	0.0625	11	1	0.0909091	6	1	0.166667	47	7	0.148936	33	1	0.030303
I	1155025	A-G	-	intron	null	112	2	0.0178571	32	2	0.0625	30	0	0	9	1	0.111111	42	0	0	16	0	0	11	0	0	6	0	0	47	0	0	34	0	0
I	1155036	A-G	-	intron	null	115	24	0.208696	32	11	0.34375	31	6	0.193548	9	1	0.111111	39	8	0.205128	16	5	0.3125	12	1	0.0833333	6	2	0.333333	50	4	0.08	33	2	0.0606061
I	1155041	A-G	-	intron	null	115	8	0.0695652	32	7	0.21875	31	3	0.0967742	9	0	0	42	1	0.0238095	16	2	0.125	12	1	0.0833333	6	2	0.333333	50	0	0	35	3	0.0857143
I	1155042	A-G	-	intron	null	115	92	0.8	32	29	0.90625	31	30	0.967742	9	8	0.888889	42	30	0.714286	16	14	0.875	12	9	0.75	6	5	0.833333	50	37	0.74	35	22	0.628571
I	1155049	A-G	-	intron	null	114	97	0.850877	32	28	0.875	31	26	0.83871	8	8	1	42	31	0.738095	16	13	0.8125	12	6	0.5	6	6	1	50	30	0.6	34	17	0.5
I	1155058	A-G	-	intron	null	119	109	0.915966	34	28	0.823529	31	26	0.83871	8	7	0.875	42	35	0.833333	15	14	0.933333	13	2	0.153846	6	3	0.5	50	7	0.14	34	8	0.235294
I	1155060	A-G	-	intron	null	120	59	0.491667	34	17	0.5	31	14	0.451613	8	3	0.375	42	17	0.404762	15	7	0.466667	12	1	0.0833333	6	1	0.166667	50	7	0.14	34	5	0.147059
I	1155062	A-G	-	intron	null	120	4	0.0333333	34	0	0	31	1	0.0322581	8	0	0	40	0	0	15	1	0.0666667	11	0	0	6	2	0.333333	50	1	0.02	34	0	0
I	1155064	A-G	-	intron	null	120	6	0.05	35	6	0.171429	31	3	0.0967742	8	0	0	42	3	0.0714286	17	0	0	10	1	0.1	6	0	0	51	0	0	34	1	0.0294118
I	1155067	A-G	-	intron	null	121	3	0.0247934	35	2	0.0571429	31	0	0	8	0	0	42	0	0	17	0	0	10	1	0.1	6	0	0	51	0	0	34	2	0.0588235
I	1155069	A-G	-	intron	null	128	17	0.132812	36	5	0.138889	32	8	0.25	8	1	0.125	41	3	0.0731707	17	3	0.176471	10	1	0.1	6	0	0	52	1	0.0192308	34	3	0.0882353
I	1155070	A-G	-	intron	null	128	17	0.132812	36	5	0.138889	32	8	0.25	8	1	0.125	41	7	0.170732	17	4	0.235294	10	0	0	6	1	0.166667	52	4	0.0769231	34	0	0
I	1155071	A-G	-	intron	null	128	9	0.0703125	36	3	0.0833333	32	1	0.03125	8	1	0.125	42	3	0.0714286	17	1	0.0588235	10	0	0	6	1	0.166667	52	4	0.0769231	34	1	0.0294118
I	1155082	A-G	-	intron	null	127	24	0.188976	36	4	0.111111	32	6	0.1875	8	2	0.25	42	9	0.214286	17	5	0.294118	13	2	0.153846	6	3	0.5	52	10	0.192308	34	4	0.117647
I	1155083	A-G	-	intron	null	128	115	0.898438	36	33	0.916667	32	26	0.8125	8	7	0.875	41	38	0.926829	17	15	0.882353	13	12	0.923077	6	6	1	52	50	0.961538	34	30	0.882353
I	1155087	A-G	-	intron	null	129	6	0.0465116	36	3	0.0833333	32	0	0	8	0	0	40	3	0.075	17	1	0.0588235	13	0	0	6	0	0	54	2	0.037037	34	2	0.0588235
I	1155088	A-G	-	intron	null	131	1	0.00763359	36	1	0.0277778	32	1	0.03125	8	0	0	42	0	0	17	0	0	13	0	0	5	0	0	54	1	0.0185185	34	2	0.0588235
I	1155089	A-G	-	intron	null	132	34	0.257576	36	13	0.361111	32	10	0.3125	8	4	0.5	42	13	0.309524	17	5	0.294118	13	0	0	6	1	0.166667	54	3	0.0555556	34	0	0
I	1155090	A-G	-	intron	null	132	24	0.181818	36	9	0.25	32	4	0.125	8	2	0.25	42	6	0.142857	17	4	0.235294	13	0	0	6	0	0	54	2	0.037037	34	1	0.0294118
I	1155092	A-G	-	intron	null	132	7	0.0530303	36	0	0	32	2	0.0625	8	0	0	40	0	0	17	0	0	13	0	0	6	0	0	54	1	0.0185185	34	0	0
I	1155094	A-G	-	intron	null	135	39	0.288889	36	18	0.5	34	15	0.441176	8	1	0.125	42	12	0.285714	17	4	0.235294	13	0	0	6	1	0.166667	56	1	0.0178571	35	1	0.0285714
I	1155100	A-G	-	intron	null	151	74	0.490066	38	27	0.710526	34	16	0.470588	8	3	0.375	43	16	0.372093	17	10	0.588235	15	1	0.0666667	6	1	0.166667	64	7	0.109375	37	5	0.135135
I	1155107	A-G	-	intron	null	153	32	0.20915	39	15	0.384615	34	7	0.205882	8	3	0.375	43	6	0.139535	17	3	0.176471	15	1	0.0666667	4	2	0.5	64	6	0.09375	37	3	0.0810811
I	1155110	A-G	-	intron	null	152	23	0.151316	39	8	0.205128	34	4	0.117647	8	2	0.25	41	6	0.146341	17	5	0.294118	15	1	0.0666667	1	1	1	64	7	0.109375	37	3	0.0810811
I	1155112	A-G	-	intron	null	146	73	0.5	38	22	0.578947	33	15	0.454545	8	6	0.75	43	27	0.627907	17	11	0.647059	15	5	0.333333	1	0	0	56	20	0.357143	34	11	0.323529
I	1155113	A-G	-	intron	null	142	26	0.183099	36	8	0.222222	32	4	0.125	7	0	0	37	6	0.162162	15	3	0.2	14	1	0.0714286	1	0	0	56	8	0.142857	33	4	0.121212
I	1155118	A-G	-	intron	null	151	22	0.145695	33	4	0.121212	28	1	0.0357143	6	0	0	23	1	0.0434783	11	2	0.181818	13	1	0.0769231	1	0	0	54	2	0.037037	36	1	0.0277778
I	1155127	A-G	-	intron	null	240	27	0.1125	56	11	0.196429	34	6	0.176471	8	2	0.25	46	11	0.23913	19	8	0.421053	17	1	0.0588235	5	1	0.2	71	3	0.0422535	38	0	0
I	1155134	A-G	-	intron	null	267	96	0.359551	66	37	0.560606	34	5	0.147059	9	3	0.333333	55	21	0.381818	22	10	0.454545	17	3	0.176471	6	2	0.333333	80	32	0.4	40	11	0.275
I	1155137	A-G	-	intron	null	280	108	0.385714	69	27	0.391304	40	18	0.45	9	2	0.222222	60	19	0.316667	25	14	0.56	19	6	0.315789	8	5	0.625	81	32	0.395062	43	18	0.418605
I	1155138	A-G	-	intron	null	298	171	0.573826	70	44	0.628571	44	31	0.704545	10	5	0.5	63	38	0.603175	25	18	0.72	19	9	0.473684	8	4	0.5	83	30	0.361446	42	17	0.404762
I	1155145	A-G	-	intron	null	338	81	0.239645	81	28	0.345679	48	10	0.208333	10	0	0	71	22	0.309859	27	7	0.259259	22	0	0	10	1	0.1	89	9	0.101124	47	4	0.0851064
I	1155149	A-G	-	intron	null	338	8	0.0236686	81	3	0.037037	48	3	0.0625	10	1	0.1	71	7	0.0985915	26	0	0	22	0	0	10	0	0	88	1	0.0113636	47	2	0.0425532
I	1155159	A-G	-	intron	null	342	35	0.102339	81	13	0.160494	48	0	0	10	1	0.1	71	8	0.112676	26	2	0.0769231	22	1	0.0454545	10	1	0.1	88	8	0.0909091	46	1	0.0217391
I	1155160	A-G	-	intron	null	340	19	0.0558824	81	5	0.0617284	48	1	0.0208333	10	0	0	72	4	0.0555556	25	0	0	22	0	0	9	1	0.111111	88	2	0.0227273	46	1	0.0217391
I	1155164	A-G	-	intron	null	344	292	0.848837	80	71	0.8875	49	39	0.795918	10	8	0.8	72	65	0.902778	25	22	0.88	22	3	0.136364	10	1	0.1	87	14	0.16092	47	2	0.0425532
I	1155165	A-G	-	intron	null	343	304	0.886297	81	74	0.91358	49	42	0.857143	10	8	0.8	73	63	0.863014	24	22	0.916667	22	5	0.227273	10	4	0.4	87	20	0.229885	47	7	0.148936
I	1155171	A-G	-	intron	null	340	154	0.452941	81	49	0.604938	49	20	0.408163	9	4	0.444444	72	26	0.361111	24	14	0.583333	22	9	0.409091	10	5	0.5	86	17	0.197674	46	14	0.304348
I	1155172	A-G	-	intron	null	340	91	0.267647	81	30	0.37037	49	10	0.204082	9	1	0.111111	74	20	0.27027	25	12	0.48	22	1	0.0454545	10	2	0.2	85	5	0.0588235	45	4	0.0888889
I	1155175	A-G	-	intron	null	342	43	0.125731	81	14	0.17284	49	7	0.142857	9	0	0	72	15	0.208333	25	6	0.24	18	2	0.111111	10	1	0.1	86	7	0.0813953	46	4	0.0869565
I	1155176	A-G	-	intron	null	339	253	0.746313	81	66	0.814815	49	33	0.673469	9	7	0.777778	72	63	0.875	25	21	0.84	18	12	0.666667	10	7	0.7	86	42	0.488372	46	17	0.369565
I	1155177	A-G	-	intron	null	339	336	0.99115	81	80	0.987654	49	47	0.959184	9	9	1	73	73	1	25	24	0.96	18	18	1	10	10	1	85	84	0.988235	46	43	0.934783
I	1155184	A-G	-	intron	null	454	182	0.400881	102	48	0.470588	59	23	0.389831	16	7	0.4375	89	40	0.449438	44	18	0.409091	35	3	0.0857143	22	3	0.136364	110	8	0.0727273	64	4	0.0625
I	1155195	A-G	-	intron	null	444	20	0.045045	96	6	0.0625	54	3	0.0555556	16	0	0	88	6	0.0681818	42	3	0.0714286	35	0	0	21	0	0	104	1	0.00961538	56	2	0.0357143
I	1155196	A-G	-	intron	null	437	60	0.1373	96	13	0.135417	54	6	0.111111	16	2	0.125	87	11	0.126437	40	9	0.225	34	3	0.0882353	21	7	0.333333	101	8	0.0792079	56	3	0.0535714
I	1155197	A-G	-	intron	null	434	92	0.211982	96	28	0.291667	53	9	0.169811	16	5	0.3125	88	20	0.227273	38	16	0.421053	34	6	0.176471	21	10	0.47619	101	7	0.0693069	53	6	0.113208
I	1155200	A-G	-	intron	null	434	310	0.714286	94	72	0.765957	53	34	0.641509	15	9	0.6	88	53	0.602273	38	29	0.763158	35	4	0.114286	21	10	0.47619	99	12	0.121212	54	8	0.148148
I	1155201	A-G	-	intron	null	433	398	0.919169	91	86	0.945055	50	45	0.9	14	14	1	88	76	0.863636	38	35	0.921053	35	14	0.4	21	17	0.809524	98	51	0.520408	52	19	0.365385
I	1155203	A-G	-	intron	null	426	10	0.0234742	88	2	0.0227273	48	0	0	15	0	0	87	4	0.045977	38	2	0.0526316	35	0	0	21	1	0.047619	95	2	0.0210526	51	0	0
I	1155210	A-G	-	intron	null	417	98	0.235012	88	29	0.329545	46	3	0.0652174	14	5	0.357143	87	23	0.264368	38	20	0.526316	35	3	0.0857143	19	4	0.210526	93	9	0.0967742	50	7	0.14
I	1155213	A-G	-	intron	null	395	98	0.248101	81	24	0.296296	41	10	0.243902	12	4	0.333333	78	16	0.205128	36	11	0.305556	32	5	0.15625	19	6	0.315789	83	15	0.180723	41	8	0.195122
I	1155235	A-G	-	intron	null	401	181	0.451372	71	34	0.478873	39	13	0.333333	13	4	0.307692	58	22	0.37931	33	18	0.545455	42	1	0.0238095	18	3	0.166667	77	1	0.012987	40	2	0.05
I	1155237	A-G	-	intron	null	382	19	0.0497382	62	5	0.0806452	37	0	0	13	0	0	54	5	0.0925926	31	2	0.0645161	43	0	0	18	0	0	74	0	0	37	0	0
I	1155275	A-G	-	intron	null	450	236	0.524444	77	45	0.584416	41	24	0.585366	20	13	0.65	69	35	0.507246	41	25	0.609756	53	17	0.320755	15	7	0.466667	82	29	0.353659	49	18	0.367347
I	1155279	A-G	-	intron	null	445	87	0.195506	78	21	0.269231	42	5	0.119048	20	4	0.2	63	17	0.269841	41	13	0.317073	50	12	0.24	20	4	0.2	80	25	0.3125	50	13	0.26
I	1155280	A-G	-	intron	null	447	183	0.409396	77	37	0.480519	40	16	0.4	20	6	0.3	62	27	0.435484	39	20	0.512821	47	16	0.340426	23	9	0.391304	73	28	0.383562	48	15	0.3125
I	1155286	A-G	-	intron	null	501	202	0.403194	90	49	0.544444	43	20	0.465116	22	9	0.409091	71	30	0.422535	45	24	0.533333	65	22	0.338462	27	14	0.518519	83	45	0.542169	54	21	0.388889
I	1155292	A-G	-	intron	null	504	488	0.968254	87	85	0.977011	42	41	0.97619	23	22	0.956522	74	72	0.972973	48	46	0.958333	66	50	0.757576	30	25	0.833333	82	61	0.743902	55	33	0.6
I	1155293	A-G	-	intron	null	504	195	0.386905	86	50	0.581395	41	14	0.341463	24	7	0.291667	76	34	0.447368	47	25	0.531915	67	2	0.0298507	31	6	0.193548	81	1	0.0123457	54	3	0.0555556
I	1155303	A-G	-	intron	null	479	13	0.0271399	79	9	0.113924	40	0	0	23	0	0	74	6	0.0810811	49	4	0.0816327	66	0	0	30	3	0.1	77	1	0.012987	51	0	0
I	1155310	A-G	-	intron	null	466	60	0.128755	74	15	0.202703	39	2	0.0512821	24	2	0.0833333	69	13	0.188406	46	12	0.26087	65	1	0.0153846	31	5	0.16129	73	2	0.0273973	54	1	0.0185185
I	1155315	A-G	-	intron	null	487	451	0.926078	78	72	0.923077	37	33	0.891892	24	22	0.916667	68	61	0.897059	47	44	0.93617	69	54	0.782609	32	27	0.84375	74	68	0.918919	54	38	0.703704
I	1155325	A-G	-	intron	null	432	47	0.108796	68	8	0.117647	29	1	0.0344828	23	1	0.0434783	56	3	0.0535714	43	6	0.139535	63	7	0.111111	28	9	0.321429	65	9	0.138462	53	4	0.0754717
I	1155331	A-G	-	intron	null	405	72	0.177778	64	16	0.25	28	4	0.142857	21	6	0.285714	53	6	0.113208	42	14	0.333333	62	4	0.0645161	28	5	0.178571	62	3	0.0483871	53	3	0.0566038
I	1155338	A-G	-	intron	null	436	27	0.0619266	65	9	0.138462	31	2	0.0645161	22	0	0	55	5	0.0909091	45	5	0.111111	70	0	0	30	3	0.1	62	0	0	55	1	0.0181818
I	11577314	A-G	-	intron	F15D3.6	0	0	-	2	1	0.5	0	0	-	0	0	-	0	0	-	1	1	1	0	0	-	1	0	0	0	0	-	0	0	-
I	11589954	A-G	-	integenic	-	0	0	-	1	1	1	0	0	-	1	1	1	0	0	-	0	0	-	0	0	-	0	0	-	0	0	-	0	0	-
I	11589955	A-G	-	integenic	-	0	0	-	1	1	1	0	0	-	1	1	1	0	0	-	0	0	-	0	0	-	0	0	-	0	0	-	0	0	-
I	11596819	A-G	+	intron	C17D12.2	0	0	-	4	2	0.5	0	0	-	0	0	-	0	0	-	1	0	0	0	0	-	4	1	0.25	0	0	-	0	0	-
I	11598034	A-G	+	intron	C17D12.2	0	0	-	0	0	-	0	0	-	1	0	0	0	0	-	0	0	-	1	1	1	3	3	1	0	0	-	0	0	-
I	11598790	A-G	+	intron	C17D12.2	0	0	-	2	2	1	0	0	-	0	0	-	0	0	-	0	0	-	0	0	-	0	0	-	0	0	-	0	0	-
I	11598791	A-G	+	intron	C17D12.2	0	0	-	2	2	1	0	0	-	0	0	-	0	0	-	0	0	-	0	0	-	0	0	-	0	0	-	0	0	-
I	11600106	A-G	+	intron	C17D12.2	1	0	0	1	1	1	0	0	-	0	0	-	0	0	-	0	0	-	0	0	-	5	3	0.6	0	0	-	0	0	-
I	11600123	A-G	+	intron	C17D12.2	1	0	0	1	1	1	0	0	-	0	0	-	0	0	-	0	0	-	0	0	-	6	2	0.333333	0	0	-	0	0	-
I	11601003	A-G	+	intron	C17D12.2	0	0	-	2	0	0	3	0	0	1	0	0	0	0	-	1	0	0	3	1	0.333333	7	2	0.285714	0	0	-	0	0	-
I	11601007	A-G	+	intron	C17D12.2	0	0	-	2	0	0	3	0	0	1	0	0	0	0	-	1	0	0	3	1	0.333333	7	1	0.142857	0	0	-	0	0	-
I	11601020	A-G	+	intron	C17D12.2	2	0	0	4	0	0	4	1	0.25	1	0	0	0	0	-	1	0	0	3	0	0	8	3	0.375	0	0	-	0	0	-
I	11601025	A-G	+	intron	C17D12.2	2	0	0	4	0	0	4	0	0	1	1	1	0	0	-	1	1	1	3	1	0.333333	8	3	0.375	0	0	-	0	0	-
I	11601061	A-G	+	intron	C17D12.2	6	0	0	6	0	0	3	0	0	1	0	0	0	0	-	1	0	0	1	0	0	11	3	0.272727	1	0	0	0	0	-
I	11601069	A-G	+	intron	C17D12.2	6	0	0	6	0	0	3	0	0	1	0	0	0	0	-	1	0	0	1	0	0	9	2	0.222222	1	0	0	0	0	-
I	11603046	A-G	+	downstream	C17D12.2	6	4	0.666667	1	1	1	0	0	-	0	0	-	0	0	-	0	0	-	4	2	0.5	6	6	1	1	1	1	0	0	-
I	11603047	A-G	+	downstream	C17D12.2	6	3	0.5	1	0	0	0	0	-	0	0	-	0	0	-	0	0	-	4	3	0.75	6	5	0.833333	1	0	0	0	0	-
I	11603059	A-G	+	downstream	C17D12.2	7	2	0.285714	1	0	0	0	0	-	0	0	-	0	0	-	0	0	-	4	0	0	6	0	0	0	0	-	0	0	-
I	11603064	A-G	+	downstream	C17D12.2	7	2	0.285714	1	0	0	0	0	-	0	0	-	0	0	-	0	0	-	4	0	0	6	0	0	1	0	0	0	0	-
I	11603111	A-G	+	downstream	null	48	15	0.3125	27	9	0.333333	19	8	0.421053	5	1	0.2	0	0	-	8	3	0.375	15	0	0	40	1	0.025	7	0	0	0	0	-
I	11603125	A-G	+	downstream	null	57	4	0.0701754	29	3	0.103448	22	0	0	7	1	0.142857	0	0	-	8	2	0.25	18	0	0	50	0	0	8	1	0.125	0	0	-
I	11603133	A-G	+	downstream	null	61	25	0.409836	31	18	0.580645	24	9	0.375	8	4	0.5	0	0	-	9	3	0.333333	22	2	0.0909091	50	17	0.34	10	2	0.2	1	0	0
I	11603139	A-G	+	downstream	null	61	2	0.0327869	32	2	0.0625	24	1	0.0416667	8	0	0	0	0	-	9	0	0	23	0	0	53	8	0.150943	9	1	0.111111	1	0	0
I	11603150	A-G	+	downstream	null	66	65	0.984848	33	33	1	28	27	0.964286	8	8	1	0	0	-	9	9	1	25	24	0.96	65	60	0.923077	11	10	0.909091	1	1	1
I	11603151	A-G	+	downstream	null	66	9	0.136364	34	3	0.0882353	27	1	0.037037	8	0	0	0	0	-	9	1	0.111111	25	3	0.12	65	8	0.123077	11	3	0.272727	1	0	0
I	11603302	A-G	+	downstream	null	23	6	0.26087	6	5	0.833333	5	1	0.2	2	2	1	0	0	-	1	0	0	10	2	0.2	20	3	0.15	3	0	0	0	0	-
I	11603303	A-G	+	downstream	null	23	6	0.26087	6	4	0.666667	5	0	0	2	2	1	0	0	-	1	0	0	11	2	0.181818	20	2	0.1	3	0	0	0	0	-
I	11603304	A-G	+	downstream	null	22	0	0	6	2	0.333333	4	0	0	2	1	0.5	0	0	-	1	0	0	11	0	0	20	2	0.1	3	0	0	0	0	-
I	11603305	A-G	+	downstream	null	21	4	0.190476	6	3	0.5	4	2	0.5	2	2	1	0	0	-	1	0	0	11	0	0	19	6	0.315789	3	0	0	0	0	-
I	11603306	A-G	+	downstream	null	22	1	0.0454545	6	2	0.333333	4	0	0	1	0	0	0	0	-	1	0	0	11	0	0	20	1	0.05	3	0	0	0	0	-
I	11603307	A-G	+	downstream	null	22	0	0	6	2	0.333333	4	0	0	2	1	0.5	0	0	-	1	0	0	11	0	0	20	1	0.05	3	0	0	0	0	-
I	11603332	A-G	+	downstream	null	27	19	0.703704	9	8	0.888889	4	2	0.5	3	3	1	2	1	0.5	0	0	-	26	10	0.384615	22	10	0.454545	6	2	0.333333	0	0	-
I	11603333	A-G	+	downstream	null	25	7	0.28	9	6	0.666667	4	2	0.5	3	2	0.666667	2	0	0	0	0	-	26	4	0.153846	22	3	0.136364	6	0	0	0	0	-
I	11603334	A-G	+	downstream	null	25	17	0.68	8	7	0.875	4	3	0.75	3	3	1	2	1	0.5	1	1	1	27	11	0.407407	22	10	0.454545	6	1	0.166667	0	0	-
I	11603339	A-G	+	downstream	null	26	12	0.461538	10	9	0.9	4	2	0.5	3	3	1	2	2	1	1	1	1	26	11	0.423077	22	13	0.590909	6	1	0.166667	0	0	-
I	11603340	A-G	+	downstream	null	27	9	0.333333	10	7	0.7	4	0	0	3	0	0	2	0	0	1	1	1	27	6	0.222222	22	8	0.363636	6	1	0.166667	0	0	-
I	11603347	A-G	-	downstream	C17D12.7	0	0	-	2	2	1	1	0	0	0	0	-	0	0	-	0	0	-	0	0	-	0	0	-	0	0	-	1	0	0
I	11603348	A-G	+	downstream	null	34	1	0.0294118	14	4	0.285714	8	2	0.25	3	1	0.333333	2	1	0.5	1	0	0	32	2	0.0625	28	1	0.0357143	5	0	0	0	0	-
I	11603422	A-G	+	downstream	null	78	2	0.025641	20	4	0.2	24	2	0.0833333	9	1	0.111111	3	0	0	2	0	0	43	0	0	51	2	0.0392157	14	0	0	1	0	0
I	11603425	A-G	+	downstream	null	83	13	0.156627	25	9	0.36	25	6	0.24	10	4	0.4	3	1	0.333333	3	1	0.333333	47	6	0.12766	57	12	0.210526	16	3	0.1875	1	0	0
I	11603427	A-G	+	downstream	null	83	13	0.156627	28	7	0.25	25	3	0.12	10	3	0.3	3	0	0	3	2	0.666667	50	1	0.02	55	1	0.0181818	15	0	0	1	0	0
I	11603444	A-G	+	downstream	null	133	15	0.112782	57	10	0.175439	43	6	0.139535	17	4	0.235294	5	1	0.2	7	0	0	79	13	0.164557	91	19	0.208791	27	3	0.111111	5	3	0.6
I	11603445	A-G	+	downstream	null	136	35	0.257353	58	16	0.275862	44	12	0.272727	16	5	0.3125	5	0	0	8	1	0.125	80	23	0.2875	95	31	0.326316	27	6	0.222222	5	3	0.6
I	11603446	A-G	+	downstream	null	136	1	0.00735294	58	7	0.12069	43	0	0	17	0	0	5	0	0	8	0	0	79	2	0.0253165	94	5	0.0531915	26	0	0	5	0	0
I	11603447	A-G	+	downstream	null	138	3	0.0217391	58	1	0.0172414	44	0	0	18	1	0.0555556	5	0	0	8	1	0.125	80	0	0	95	6	0.0631579	27	0	0	5	1	0.2
I	11603472	A-G	+	downstream	null	179	73	0.407821	73	47	0.643836	57	26	0.45614	21	9	0.428571	7	3	0.428571	9	4	0.444444	88	22	0.25	99	22	0.222222	36	3	0.0833333	5	2	0.4
I	11603473	A-G	+	downstream	null	179	18	0.100559	73	7	0.0958904	57	4	0.0701754	21	2	0.0952381	7	1	0.142857	9	0	0	88	1	0.0113636	101	0	0	37	0	0	5	0	0
I	11603481	A-G	+	downstream	null	181	4	0.0220994	74	6	0.0810811	57	1	0.0175439	21	0	0	7	0	0	9	1	0.111111	88	0	0	98	1	0.0102041	38	0	0	5	0	0
I	11603624	A-G	+	downstream	null	65	2	0.0307692	25	2	0.08	13	1	0.0769231	7	0	0	3	0	0	2	0	0	28	1	0.0357143	26	2	0.0769231	17	2	0.117647	0	0	-
I	11603625	A-G	+	downstream	null	63	1	0.015873	21	0	0	13	0	0	7	0	0	3	0	0	2	0	0	25	0	0	27	5	0.185185	15	0	0	0	0	-
I	11603626	A-G	+	downstream	null	62	0	0	21	0	0	13	0	0	7	0	0	3	0	0	2	1	0.5	25	1	0.04	27	3	0.111111	15	0	0	0	0	-
I	11603627	A-G	+	downstream	null	61	15	0.245902	18	7	0.388889	13	2	0.153846	7	0	0	3	0	0	2	1	0.5	24	12	0.5	25	15	0.6	15	11	0.733333	0	0	-
I	11603635	A-G	+	downstream	null	58	0	0	19	1	0.0526316	13	0	0	7	0	0	2	0	0	2	0	0	23	5	0.217391	28	3	0.107143	15	3	0.2	0	0	-
I	11603639	A-G	-	downstream	C17D12.7	0	0	-	1	1	1	0	0	-	0	0	-	1	1	1	0	0	-	2	2	1	0	0	-	0	0	-	0	0	-
I	11603640	A-G	+	downstream	null	56	9	0.160714	18	3	0.166667	13	0	0	7	3	0.428571	2	1	0.5	2	2	1	20	3	0.15	24	10	0.416667	13	1	0.0769231	0	0	-
I	11603641	A-G	+	downstream	null	56	6	0.107143	18	1	0.0555556	13	1	0.0769231	7	0	0	2	1	0.5	2	0	0	20	3	0.15	25	3	0.12	13	1	0.0769231	0	0	-
I	11603649	A-G	+	downstream	null	6	0	0	4	0	0	3	0	0	3	0	0	0	0	-	0	0	-	9	0	0	18	2	0.111111	2	0	0	0	0	-
I	11603723	A-G	+	downstream	null	70	1	0.0142857	31	3	0.0967742	23	0	0	5	1	0.2	0	0	-	6	0	0	40	0	0	120	3	0.025	9	0	0	0	0	-
I	11603728	A-G	+	downstream	null	70	1	0.0142857	31	3	0.0967742	24	0	0	5	0	0	0	0	-	6	0	0	41	0	0	119	7	0.0588235	9	0	0	0	0	-
I	11603745	A-G	+	downstream	null	111	29	0.261261	60	20	0.333333	40	8	0.2	9	3	0.333333	1	1	1	8	3	0.375	69	28	0.405797	160	91	0.56875	15	7	0.466667	3	3	1
I	11603746	A-G	+	downstream	null	113	16	0.141593	60	12	0.2	40	5	0.125	9	2	0.222222	1	0	0	8	1	0.125	69	27	0.391304	163	84	0.515337	16	5	0.3125	3	3	1
I	11603747	A-G	+	downstream	null	113	1	0.00884956	61	0	0	41	1	0.0243902	9	0	0	1	0	0	8	1	0.125	70	3	0.0428571	163	12	0.0736196	17	0	0	3	0	0
I	11603748	A-G	+	downstream	null	114	3	0.0263158	63	5	0.0793651	41	2	0.0487805	9	0	0	1	0	0	8	0	0	71	6	0.084507	163	24	0.147239	17	0	0	3	0	0
I	11603764	A-G	+	downstream	null	132	23	0.174242	72	34	0.472222	43	10	0.232558	12	1	0.0833333	1	1	1	8	3	0.375	82	49	0.597561	156	108	0.692308	18	9	0.5	3	3	1
I	11603765	A-G	+	downstream	null	133	6	0.0451128	72	23	0.319444	43	7	0.162791	13	0	0	1	0	0	8	1	0.125	83	33	0.39759	158	92	0.582278	19	4	0.210526	3	1	0.333333
I	11603767	A-G	+	downstream	null	135	2	0.0148148	69	6	0.0869565	44	3	0.0681818	13	0	0	1	0	0	8	0	0	84	3	0.0357143	152	25	0.164474	19	0	0	3	0	0
I	11604337	A-G	-	downstream	C17D12.7	4	1	0.25	0	0	-	0	0	-	2	0	0	4	1	0.25	5	1	0.2	4	3	0.75	0	0	-	0	0	-	5	2	0.4
I	11604347	A-G	-	downstream	C17D12.7	4	1	0.25	0	0	-	0	0	-	2	0	0	4	0	0	5	1	0.2	4	0	0	0	0	-	0	0	-	5	1	0.2
I	11604443	A-G	-	downstream	C17D12.7	4	1	0.25	0	0	-	0	0	-	2	1	0.5	2	0	0	6	2	0.333333	2	1	0.5	0	0	-	1	0	0	3	2	0.666667
I	11604448	A-G	-	downstream	C17D12.7	4	2	0.5	0	0	-	0	0	-	2	2	1	2	1	0.5	6	2	0.333333	2	2	1	0	0	-	1	1	1	4	4	1
I	11606007	A-G	-	intron	C17D12.7	1	1	1	1	1	1	0	0	-	0	0	-	0	0	-	0	0	-	0	0	-	0	0	-	0	0	-	0	0	-
I	11606008	A-G	-	intron	C17D12.7	1	1	1	1	1	1	0	0	-	0	0	-	0	0	-	0	0	-	0	0	-	0	0	-	0	0	-	0	0	-
I	1161151	A-G	+	intron	Y48G8AL.7	0	0	-	0	0	-	0	0	-	0	0	-	0	0	-	0	0	-	0	0	-	1	1	1	0	0	-	1	1	1
I	11612857	A-G	+	intron	C17D12.1	1	0	0	2	1	0.5	0	0	-	0	0	-	0	0	-	1	1	1	0	0	-	0	0	-	0	0	-	1	1	1
[truncated: 46,286 more rows]

## Sheet: Supplementary Table 7
Editing site	Gene	Codon change	DNA-seq	RNA-seq										Primers
				N2						adr-1
[truncated: 12 more rows]

## Sheet: Supplemental Table 10
chr	position	species
[truncated: 62 more rows]
